# Supplementary material
Source: publisher site journal article supplement (https://www.dovepress.com/get_supplementary_file.php?f=350715-supplementary-table-S1.xlsx)
Supplement: Supplementary file 1 [file get_supplementary_file.php]

## Sheet: Summary
Header line description of table 1			Table 1. MS/MS spectrum database search analysis summary
Total spectrum	Number of spectrum produced by mass spectrometer
Matched spectrum	Number of spectrum matched with alignment protein		Total spectrums	Matched spectrums	Peptides	Unique peptides	Identified proteins	Quantifiable proteins
Peptides	Number of peptides which spectrum hit		383368	74259	18956	11891	1855	1640
Unique peptides	Number of unique peptides which spectrums hit
Identified proteins	Number of proteins detected by spectrum search analysis
Quantifiable proteins	Number of proteins quantifiable		Table 2. Differentially expressed protein summary (Filtered whith threshold value of expression fold change and P value < 0.05)
Header line description of worksheet "Protein_quant"			Compare group	Regulated type	fold change >1.2	fold change >1.3	fold change >1.5	fold change >2
Protein accession	Protein accession number of database used for search		S_E_1_2MIC_P/S_E	Up-regulated	128	67	31	6
Protein description	Protein functional description			Down-regulated	120	67	31	8
Gene name	Indicates the name of the gene that code for the protein sequence
MW [kDa]	Protein molecular weight ,unit [kDa]
Score	A simple rule to be used to judge whether a result is significant or not
Coverage [%]	Percent of identified peptdie sequence covering in protein sequence
Peptides	Number of peptides whitch spectrums hit
Unique peptides	Number of unique peptides which spectrums hit
Header line description of worksheet "Peptide_quant"
ID	Identified peptide index number
Sequence	Identified peptide amino acid sequence
Protein accession	Protein accession number of database used for search
Protein description	Protein functional description
Charge	Carried charge of peptide
m/z	Mass-to-charge ratio of peptide
mass error [ppm]	Parts per million ratio of peptide mass error between the theory and practice
PEP	The maximal posterior error probability for peptides

## Sheet: Protein Quant
Protein accession	Protein description	Gene name	MW [kDa]	Coverage [%]	Peptides	Unique peptides	PSMs	S_E_1	S_E_1_2MIC_P_1	S_E_1_2MIC_P_2	S_E_1_2MIC_P_3	S_E_2	S_E_3	S_E_1_2MIC_P/S_E Ratio	S_E_1_2MIC_P/S_E P value
I6TJQ3	Tail tape measure protein OS=Staphylococcus virus IPLA5 OX=1197952 GN=IPLA5_0016 PE=4 SV=1	IPLA5_0016	111.94	1	1	1	1	0.885	1.092	1.202	1.105	0.871	0.824	1.317	0.00177362
Q5HPL3	Threonine synthase OS=Staphylococcus epidermidis (strain ATCC 35984 / RP62A) OX=176279 GN=thrC PE=3 SV=1	thrC	38.277	11	3	3	5	1.02	0.938	0.992	1.246	0.926	0.888	1.121	0.324028
E5FXR0	Translation elongation factor Tu (Fragment) OS=Staphylococcus epidermidis OX=1282 GN=tuf PE=4 SV=1	tuf	20.901	93.1	19	2	268
Q5HL43	DHOdehase OS=Staphylococcus epidermidis (strain ATCC 35984 / RP62A) OX=176279 GN=pyrD PE=3 SV=1	pyrD	39.378	49.4	13	12	22	0.955	1.057	1.041	1.058	0.942	0.946	1.11	9.49397e-05
A0A7G9EA34	YycI domain-containing protein OS=Staphylococcus epidermidis OX=1282 GN=ATM22_00115 PE=4 SV=1	ATM22_00115	30.473	49.8	13	13	22	1.03	0.958	0.97	0.983	1.084	1.029	0.926	0.0151032
Q8CN01	Copper chaperone CopZ OS=Staphylococcus epidermidis (strain ATCC 12228 / FDA PCI 1200) OX=176280 GN=copZ PE=3 SV=1	copZ	45.688	24.6	10	1	109	0.885	1.067	1.096	1.13	0.916	0.895	1.221	0.000503448
Q8CNB8	Putative 2-hydroxyacid dehydrogenase SE_1879 OS=Staphylococcus epidermidis (strain ATCC 12228 / FDA PCI 1200) OX=176280 GN=SE_1879 PE=3 SV=1	SE_1879	34.75	75.4	22	22	142	1.069	0.96	0.952	0.951	1.07	1.041	0.9	0.000379907
Q8CSS7	Ribonuclease Y OS=Staphylococcus epidermidis (strain ATCC 12228 / FDA PCI 1200) OX=176280 GN=rny PE=3 SV=1	rny	58.696	38.9	23	23	43	0.92	1.072	1.103	1.043	0.954	0.944	1.142	0.00240415
Q5HS64	Penicillinase repressor OS=Staphylococcus epidermidis (strain ATCC 35984 / RP62A) OX=176279 GN=blaI-2 PE=3 SV=1	blaI-2	13.933	57.3	11	11	17	0.95	1.055	1.035	1.034	0.951	0.984	1.083	0.00387862
D4FID6	DNA-(apurinic or apyrimidinic site) lyase MutM OS=Staphylococcus epidermidis M23864:W2(grey) OX=525375 GN=mutM PE=3 SV=1	mutM	33.542	24.8	10	1	13	1.024	0.912	0.891	1.024	1.175	1.024	0.877	0.105911
A0A0E1VCU9	Asparagine--tRNA ligase OS=Staphylococcus epidermidis W23144 OX=525376 GN=asnS PE=3 SV=1	asnS	105.17	31.4	21	21	105	0.979	1.002	1.041	1.027	0.968	0.965	1.054	0.011754
Q8CSH5	Cytidylate kinase OS=Staphylococcus epidermidis (strain ATCC 12228 / FDA PCI 1200) OX=176280 GN=cmk PE=3 SV=1	cmk	24.254	71.6	15	15	32	1.012	1	1.011	1.016	0.98	1.004	1.01	0.389202
Q8CRA9	Putative hemin transport system permease protein HrtB OS=Staphylococcus epidermidis (strain ATCC 12228 / FDA PCI 1200) OX=176280 GN=hrtB PE=3 SV=1	hrtB	39.189	13.4	4	4	6	1.057	0.884	0.887	0.874	1.173	1.14	0.785	0.00153936
A0A7H5C9T3	Probable dual-specificity RNA methyltransferase RlmN OS=Staphylococcus epidermidis OX=1282 GN=rlmN PE=3 SV=1	rlmN	42.199	24.7	7	1	15
A0A0H2WYC2	Pathogenicity island protein OS=Staphylococcus aureus (strain COL) OX=93062 GN=SACOL0904 PE=4 SV=1	SACOL0904	59.023	5.1	3	1	3	1.14	0.966	0.861	1.059	1.004	1.009	0.915	0.283038
A0A0H2VDY3	Uncharacterized protein OS=Staphylococcus epidermidis (strain ATCC 12228 / FDA PCI 1200) OX=176280 GN=SE_0040 PE=4 SV=1	SE_0040	40.676	46	13	13	26	0.989	1.003	1.008	1.012	0.953	0.987	1.032	0.0615165
D4FMN6	Serine acetyltransferase OS=Staphylococcus epidermidis M23864:W2(grey) OX=525375 GN=cysE PE=3 SV=1	cysE	23.15	38.8	6	1	15	1.001	0.964	1.22	1.032	0.891	0.841	1.177	0.137982
Q8CTT4	50S ribosomal protein L1 OS=Staphylococcus epidermidis (strain ATCC 12228 / FDA PCI 1200) OX=176280 GN=rplA PE=3 SV=1	rplA	25.027	65.4	16	16	109	0.931	1.034	1.069	1.031	0.938	0.954	1.11	0.00157799
A0A7H5C9N2	SCP-like extracellular protein OS=Staphylococcus epidermidis OX=1282 GN=F9B71_03565 PE=4 SV=1	F9B71_03565	39.979	33.7	11	1	21	1.027	0.947	0.991	0.987	1.003	1.07	0.944	0.0717332
A0A7I0ALY8	Teichoic acid biosynthesis protein F OS=Staphylococcus epidermidis OX=1282 GN=E1N03_04655 PE=3 SV=1	E1N03_04655	65.706	40.1	21	1	53	1.156	0.835	0.767	1.016	1.147	1.148	0.759	0.0272439
Q5HN55	Aminopeptidase family protein OS=Staphylococcus epidermidis (strain ATCC 35984 / RP62A) OX=176279 GN=SERP1417 PE=3 SV=1	SERP1417	46.845	65.1	21	21	71	1.017	0.982	0.975	1.006	1.018	1.016	0.971	0.0364056
Q5HR68	Flavohemoglobin OS=Staphylococcus epidermidis (strain ATCC 35984 / RP62A) OX=176279 GN=SERP0325 PE=3 SV=1	SERP0325	42.983	64	21	20	300	1	0.988	1.011	0.976	1.002	1.003	0.99	0.383384
A0A7I0BJ37	LLM class flavin-dependent oxidoreductase OS=Staphylococcus epidermidis OX=1282 GN=E1N03_00895 PE=4 SV=1	E1N03_00895	37.206	45.9	12	1	54	1.017	0.989	1.024	0.926	1.022	1.048	0.952	0.181892
A0A0W1LUQ8	Alkaline shock protein 23 OS=Staphylococcus epidermidis OX=1282 GN=ATM22_06165 PE=3 SV=1	ATM22_06165	13.21	51.7	4	4	12	0.944	0.973	1.05	0.99	0.927	0.954	1.067	0.0595519
A0A7I0BHF2	TetR/AcrR family transcriptional regulator OS=Staphylococcus epidermidis OX=1282 GN=E1N03_04590 PE=4 SV=1	E1N03_04590	21.931	26.8	5	1	10	0.962	1.439	1.008	1.117	0.565	0.853	1.497	0.0964851
Q5HKB7	Arsenate reductase 2 OS=Staphylococcus epidermidis (strain ATCC 35984 / RP62A) OX=176279 GN=arsC2 PE=3 SV=1	arsC2	14.692	58.8	6	3	14	0.968	1.008	1.034	1.014	0.944	0.999	1.05	0.0542388
A0A7H5CAJ5	Lysostaphin OS=Staphylococcus epidermidis OX=1282 GN=F9B71_04610 PE=3 SV=1	F9B71_04610	160.2	1	1	1	1
D4FNW0	Argininosuccinate lyase OS=Staphylococcus epidermidis M23864:W2(grey) OX=525375 GN=argH PE=3 SV=1	argH	103.37	18.8	14	2	38
D4FHU6	Epoxyqueuosine reductase OS=Staphylococcus epidermidis M23864:W2(grey) OX=525375 GN=queG PE=3 SV=1	queG	133.64	25.9	25	9	45	0.984	1.052	1.052	0.9	1.021	0.943	1.019	0.783753
A0A0H2VF26	Uncharacterized protein OS=Staphylococcus epidermidis (strain ATCC 12228 / FDA PCI 1200) OX=176280 GN=SE_0369 PE=4 SV=1	SE_0369	50.409	36.1	13	1	30	1.051	0.992	0.986	0.954	1.037	1.01	0.946	0.0308146
A0A7H5C4C9	Replication initiator protein A OS=Staphylococcus epidermidis OX=1282 GN=F9B71_12445 PE=4 SV=1	F9B71_12445	37.725	14.1	4	1	4	0.992	0.953	0.88	1.045	1.092	1.074	0.911	0.177751
Q5HME1	bPH_2 domain-containing protein OS=Staphylococcus epidermidis (strain ATCC 35984 / RP62A) OX=176279 GN=SERP1687 PE=4 SV=1	SERP1687	18.739	8.2	1	1	2	1.01	0.994	1.059	1	0.969	0.985	1.03	0.280371
Q5HQ33	Uncharacterized protein OS=Staphylococcus epidermidis (strain ATCC 35984 / RP62A) OX=176279 GN=SERP0724 PE=4 SV=1	SERP0724	10.313	53.4	6	6	9	1.066	0.935	1.03	0.962	0.999	0.985	0.96	0.333123
A0A0H2VGK2	Uncharacterized protein OS=Staphylococcus epidermidis (strain ATCC 12228 / FDA PCI 1200) OX=176280 GN=SE_1306 PE=4 SV=1	SE_1306	37.297	52.9	12	1	57	0.878	0.952	1.067	0.99	1.111	0.926	1.032	0.673043
Q8CP18	Chaperone protein DnaJ OS=Staphylococcus epidermidis (strain ATCC 12228 / FDA PCI 1200) OX=176280 GN=dnaJ PE=3 SV=1	dnaJ	41.158	55.2	24	1	67	0.964	1.052	1.15	0.938	0.944	0.954	1.097	0.206565
Q5HKU0	Neutral metalloproteinase OS=Staphylococcus epidermidis (strain ATCC 35984 / RP62A) OX=176279 GN=sepA PE=3 SV=1	sepA	138	27.2	30	7	64	0.954	1.008	1.051	1.012	0.946	0.944	1.08	0.0050111
Q5HNT6	tRNA 5-hydroxyuridine methyltransferase OS=Staphylococcus epidermidis (strain ATCC 35984 / RP62A) OX=176279 GN=trmR PE=3 SV=1	trmR	24.689	26.5	5	1	14	1.016	0.996	0.899	1.035	1.056	1.011	0.95	0.301339
E9RGS5	VanY domain-containing protein OS=Staphylococcus epidermidis OX=1282 PE=4 SV=1	--	25.82	13.2	3	3	3	1.038	0.939	1.012	0.917	1.083	1.016	0.914	0.0621925
Q5HL61	Ferrous iron transport protein B OS=Staphylococcus epidermidis (strain ATCC 35984 / RP62A) OX=176279 GN=feoB PE=3 SV=1	feoB	74.49	4.8	2	2	2	0.942	1.06	1.03	1.224	0.911	0.826	1.237	0.0333834
A0A0H2VIT9	Tn552 transposase OS=Staphylococcus epidermidis (strain ATCC 12228 / FDA PCI 1200) OX=176280 GN=SE_p510 PE=4 SV=1	SE_p510	56.335	32.5	14	14	21	1.015	0.968	0.894	1.046	1.014	1	0.96	0.400959
Q8CS91	Holliday junction ATP-dependent DNA helicase RuvB OS=Staphylococcus epidermidis (strain ATCC 12228 / FDA PCI 1200) OX=176280 GN=ruvB PE=3 SV=1	ruvB	37.856	58.1	15	15	27	0.968	1.018	0.988	0.992	1.043	1.001	0.995	0.864463
Q8CS89	50S ribosomal protein L27 OS=Staphylococcus epidermidis (strain ATCC 12228 / FDA PCI 1200) OX=176280 GN=rpmA PE=3 SV=1	rpmA	10.317	45.7	6	6	21	1.018	0.992	0.923	1.059	1.085	0.946	0.975	0.679814
Q8CS25	Phosphoenolpyruvate carboxykinase (ATP) OS=Staphylococcus epidermidis (strain ATCC 12228 / FDA PCI 1200) OX=176280 GN=pckA PE=3 SV=1	pckA	59.549	27	11	11	14	1.104	0.944	0.959	0.997	1.058	0.996	0.918	0.0675651
D4FNR9	Uncharacterized protein OS=Staphylococcus epidermidis M23864:W2(grey) OX=525375 GN=HMPREF0794_2207 PE=4 SV=1	HMPREF0794_2207	38.569	5.9	2	2	4	1.009	1.219	1.154	0.762	0.77	1.072	1.1	0.664363
Q5HP72	DNA-binding protein HU OS=Staphylococcus epidermidis (strain ATCC 35984 / RP62A) OX=176279 GN=hup PE=3 SV=1	hup	54.343	23.7	17	4	332	0.926	1.022	1.069	1.048	0.96	0.97	1.099	0.00785996
Q8CTV7	UPF0312 protein SE_0264 OS=Staphylococcus epidermidis (strain ATCC 12228 / FDA PCI 1200) OX=176280 GN=SE_0264 PE=3 SV=1	SE_0264	19.194	93	13	13	91	1.019	0.983	0.946	1.007	1.009	1.023	0.962	0.106398
Q8CP90	Cold shock protein CspA OS=Staphylococcus epidermidis (strain ATCC 12228 / FDA PCI 1200) OX=176280 GN=cspA PE=3 SV=1	cspA	7.351	40.9	5	5	71	0.933	1.05	1.057	1.004	0.97	0.963	1.085	0.0151306
A0A0H2WZ85	Ribonucleoside-diphosphate reductase OS=Staphylococcus aureus (strain COL) OX=93062 GN=SACOL0792 PE=3 SV=1	SACOL0792	80.125	19.3	11	1	42	0.792	1.223	1.157	1.043	0.839	0.91	1.347	0.00849132
I0B6K2	Helix-turn-helix domain-containing protein OS=Staphylococcus epidermidis OX=1282 GN=E1M98_10105 PE=4 SV=1	E1M98_10105	23.794	30.5	4	4	5	1.04	1.01	0.973	0.938	1.03	1.018	0.946	0.065342
Q5HP04	Metallo-beta-lactamase family protein OS=Staphylococcus epidermidis (strain ATCC 35984 / RP62A) OX=176279 GN=SERP1110 PE=4 SV=1	SERP1110	23.171	72	10	10	32	1.099	0.953	0.917	0.973	1.072	1.037	0.886	0.00750649
Q8CUG0	Plasmid recombination enzyme type 3 OS=Staphylococcus epidermidis (strain ATCC 12228 / FDA PCI 1200) OX=176280 GN=SE_p102 PE=3 SV=1	SE_p102	48.525	55.7	23	22	66	1.06	0.937	0.945	0.926	1.056	1.064	0.883	3.82467e-05
A0A7I0AQV9	Riboflavin synthase OS=Staphylococcus epidermidis OX=1282 GN=ATM22_05020 PE=4 SV=1	ATM22_05020	23.311	31.9	6	6	8	0.982	1.007	1.023	1.013	0.934	0.996	1.045	0.0911668
Q5HQL8	ComA2 family protein OS=Staphylococcus epidermidis (strain ATCC 35984 / RP62A) OX=176279 GN=SERP0530 PE=4 SV=1	SERP0530	13.692	33.1	5	5	10	0.985	0.968	1.09	1.022	0.968	0.992	1.046	0.280788
Q8CTA4	Probable cysteine desulfurase OS=Staphylococcus epidermidis (strain ATCC 12228 / FDA PCI 1200) OX=176280 GN=csd PE=3 SV=1	csd	46.02	32.2	12	2	41	1.255	0.845	0.815	0.976	1.186	1.033	0.759	0.0259462
Q5HNG4	Glutamyl-aminopeptidase OS=Staphylococcus epidermidis (strain ATCC 35984 / RP62A) OX=176279 GN=pepA PE=3 SV=1	pepA	93.875	30.2	19	7	55	1.001	1.01	0.9	1.045	0.997	1.004	0.984	0.71417
A0A7T9WUG3	Sphingomyelin phosphodiesterase OS=Staphylococcus epidermidis OX=1282 GN=sph PE=4 SV=1	sph	37.579	10.7	3	3	3	1.054	0.968	0.857	1.025	1.064	1.071	0.894	0.0955321
A0A0H2WXQ3	Uncharacterized protein OS=Staphylococcus aureus (strain COL) OX=93062 GN=SACOL2429 PE=4 SV=1	SACOL2429	63.017	4.7	3	1	3	1.059	1.038	0.959	0.957	0.992	1.021	0.962	0.29393
Q8CSX8	Transcriptional regulator MraZ OS=Staphylococcus epidermidis (strain ATCC 12228 / FDA PCI 1200) OX=176280 GN=mraZ PE=3 SV=1	mraZ	17.207	36.4	4	2	6	1.027	0.947	0.954	0.966	1.045	1.057	0.916	0.00101167
D4FK99	3-oxoacyl-[acyl-carrier-protein] synthase 3 OS=Staphylococcus epidermidis M23864:W2(grey) OX=525375 GN=fabH PE=3 SV=1	fabH	92.375	24.5	14	12	86	0.971	0.972	1.013	1.014	0.992	0.995	1.014	0.440068
A0A5R1C1V6	Uncharacterized protein (Fragment) OS=Staphylococcus epidermidis OX=1282 GN=E1N04_10440 PE=4 SV=1	E1N04_10440	45.326	12.2	3	3	3	0.917	1.064	1.072	1.078	0.971	0.898	1.154	0.00373905
Q8CQT5	Nucleoid-associated protein SE_2306 OS=Staphylococcus epidermidis (strain ATCC 12228 / FDA PCI 1200) OX=176280 GN=SE_2306 PE=3 SV=1	SE_2306	11.598	83.8	9	9	70	1.004	1.003	0.977	0.987	1.038	1.004	0.974	0.12371
Q8CNJ1	ATP synthase subunit a OS=Staphylococcus epidermidis (strain ATCC 12228 / FDA PCI 1200) OX=176280 GN=atpB PE=3 SV=1	atpB	27.342	4.1	1	1	2	0.939	0.949	0.902	0.946	0.918	1.361	0.869	0.391374
A0A0E1VLX8	Ribosome maturation factor RimP OS=Staphylococcus epidermidis W23144 OX=525376 GN=rimP PE=3 SV=1	rimP	17.653	55.5	7	2	37	0.99	1.003	0.992	0.967	1.026	1.003	0.981	0.273498
A0A125SJH5	D-alanyl-D-alanine carboxypeptidase OS=Staphylococcus epidermidis OX=1282 PE=3 SV=1	--	44.367	6.2	2	2	2	1.014	0.92	1.052	1.05	0.99	0.994	1.008	0.898882
Q5HHQ9	UvrABC system protein A OS=Staphylococcus aureus (strain COL) OX=93062 GN=uvrA PE=3 SV=1	uvrA	105.37	25.9	20	1	46	1.025	1.123	1.093	0.896	0.831	1.028	1.079	0.490286
A0A0E1VL69	Aminomethyltransferase OS=Staphylococcus epidermidis W23144 OX=525376 GN=gcvT PE=3 SV=1	gcvT	70.475	34.7	16	1	39	0.966	0.987	0.981	0.983	1.022	1.081	0.962	0.305747
Q5HIF7	Lysine--tRNA ligase OS=Staphylococcus aureus (strain COL) OX=93062 GN=lysS PE=3 SV=1	lysS	56.719	19	11	1	42	0.985	1.031	1.008	0.931	1.094	0.98	0.971	0.571259
Q5HLR7	Flavin_Reduct domain-containing protein OS=Staphylococcus epidermidis (strain ATCC 35984 / RP62A) OX=176279 GN=SERP1916 PE=4 SV=1	SERP1916	22.531	16.7	3	3	5	0.943	1.028	1.064	0.996	0.945	0.95	1.088	0.0118838
Q5HLD4	MutT/nudix family protein OS=Staphylococcus epidermidis (strain ATCC 35984 / RP62A) OX=176279 GN=SERP2053 PE=4 SV=1	SERP2053	15.215	78	11	11	28	0.982	1	1.01	0.994	1.01	0.972	1.013	0.336111
A0A0H2VJ13	Uncharacterized protein OS=Staphylococcus epidermidis (strain ATCC 12228 / FDA PCI 1200) OX=176280 GN=SE_2383 PE=4 SV=1	SE_2383	28.506	48.6	11	1	19
Q8CS70	Dephospho-CoA kinase OS=Staphylococcus epidermidis (strain ATCC 12228 / FDA PCI 1200) OX=176280 GN=coaE PE=3 SV=1	coaE	23.113	37.4	8	8	24	0.921	1.06	1.078	1.009	0.94	0.962	1.115	0.00992839
A0A7Z1QSL3	L-asparaginase (Fragment) OS=Staphylococcus epidermidis OX=1282 GN=CP553_12450 PE=4 SV=1	CP553_12450	24.867	6.3	1	1	2	0.951	1.08	0.993	1.023	0.964	0.995	1.064	0.0929008
A0A0E1V915	50S ribosomal protein L29 OS=Staphylococcus epidermidis W23144 OX=525376 GN=rpmC PE=3 SV=1	rpmC	47.774	17.4	8	5	26	0.915	1.086	1.098	1.087	0.896	0.901	1.206	1.29055e-05
Q8CPJ3	Orotidine 5'-phosphate decarboxylase OS=Staphylococcus epidermidis (strain ATCC 12228 / FDA PCI 1200) OX=176280 GN=pyrF PE=3 SV=2	pyrF	25.555	60	12	12	17	1.051	0.96	0.98	1.019	1.011	1.023	0.959	0.115926
A0A7U0AC98	Uncharacterized protein OS=Staphylococcus epidermidis OX=1282 GN=I6I40_03335 PE=4 SV=1	I6I40_03335	17.83	69.5	12	1	35	1.03	0.924	1.03	1.116	0.98	0.946	1.039	0.586233
Q8CRM7	UDP-N-acetylglucosamine 1-carboxyvinyltransferase 2 OS=Staphylococcus epidermidis (strain ATCC 12228 / FDA PCI 1200) OX=176280 GN=murA2 PE=3 SV=1	murA2	45.177	71.4	22	3	60	0.974	1.011	1.056	0.985	0.986	0.96	1.045	0.113611
Q7ZAJ4	Tyrosine recombinase XerC OS=Staphylococcus epidermidis (strain ATCC 12228 / FDA PCI 1200) OX=176280 GN=xerC PE=3 SV=1	xerC	35.036	16.6	5	1	9	1.12	0.934	0.861	1.078	1.032	1.018	0.906	0.230971
A0A2G7I3I4	Cytidine deaminase OS=Staphylococcus epidermidis OX=1282 GN=cdd PE=3 SV=1	cdd	14.785	77.6	5	5	10	1.051	0.967	0.959	1.019	1.042	1.028	0.944	0.0436841
Q5HM66	Uncharacterized protein OS=Staphylococcus epidermidis (strain ATCC 35984 / RP62A) OX=176279 GN=SERP1763 PE=4 SV=1	SERP1763	34.912	46.6	13	13	29	1.014	0.998	1.019	1.006	0.997	1.014	0.999	0.939708
Q8CT26	Phosphoribosylamine--glycine ligase OS=Staphylococcus epidermidis (strain ATCC 12228 / FDA PCI 1200) OX=176280 GN=purD PE=3 SV=2	purD	45.326	40.2	15	15	36	1.1	0.967	0.94	0.906	1.111	1.053	0.862	0.00402284
Q5HFU7	30S ribosomal protein S1 OS=Staphylococcus aureus (strain COL) OX=93062 GN=rpsA PE=3 SV=1	rpsA	43.287	32	12	1	95
A0A0E1VBV9	3-deoxy-7-phosphoheptulonate synthase OS=Staphylococcus epidermidis W23144 OX=525376 GN=aroF PE=4 SV=1	aroF	92.648	38.4	30	17	98	1.012	1.004	0.99	0.996	1.01	1.004	0.988	0.0639249
A0A0E1VHD0	Uncharacterized protein OS=Staphylococcus epidermidis W23144 OX=525376 GN=HMPREF0791_0284 PE=3 SV=1	HMPREF0791_0284	38.366	44.4	11	1	44	1.11	0.949	0.879	1.056	1.071	0.981	0.912	0.221398
A0A0H2VHE8	3-oxoacyl-(Acyl-carrier protein) reductase OS=Staphylococcus epidermidis (strain ATCC 12228 / FDA PCI 1200) OX=176280 GN=SE_1830 PE=4 SV=1	SE_1830	29.134	28.5	6	2	14	0.974	1.103	0.823	1.076	0.922	0.943	1.057	0.643141
Q8CRC6	Ribulokinase OS=Staphylococcus epidermidis (strain ATCC 12228 / FDA PCI 1200) OX=176280 GN=araB PE=3 SV=1	araB	60.051	32.5	11	3	21	1.133	0.913	0.88	0.976	1.068	1.12	0.834	0.00665895
A0A0H2VIT3	Uncharacterized protein OS=Staphylococcus epidermidis (strain ATCC 12228 / FDA PCI 1200) OX=176280 GN=SE_p504 PE=4 SV=1	SE_p504	12.507	45.8	4	4	9	1.212	0.839	0.774	0.998	1.171	1.082	0.754	0.0249064
Q8CNJ9	3-hydroxyacyl-[acyl-carrier-protein] dehydratase FabZ OS=Staphylococcus epidermidis (strain ATCC 12228 / FDA PCI 1200) OX=176280 GN=fabZ PE=3 SV=1	fabZ	15.903	44.8	6	6	25	1.037	0.94	0.934	0.95	1.075	1.03	0.899	0.00167158
Q5HQZ8	Ribonucleoside-diphosphate reductase OS=Staphylococcus epidermidis (strain ATCC 35984 / RP62A) OX=176279 GN=nrdF-1 PE=3 SV=1	nrdF-1	37.424	45	13	13	49	0.954	1.042	1.045	1.048	0.935	0.952	1.103	0.000117102
Q8CPD8	Cardiolipin synthase 1 OS=Staphylococcus epidermidis (strain ATCC 12228 / FDA PCI 1200) OX=176280 GN=cls1 PE=3 SV=1	cls1	56.431	32.4	12	12	24	0.981	0.978	1.02	1.016	1.003	0.973	1.019	0.305739
Q8CPE6	Aerobic glycerol-3-phosphate dehydrogenase OS=Staphylococcus epidermidis (strain ATCC 12228 / FDA PCI 1200) OX=176280 GN=glpD PE=3 SV=1	glpD	62.275	75.8	40	32	373	1.005	0.986	0.978	1.018	1.01	1	0.989	0.425102
Q8CSC1	Probable nicotinate-nucleotide adenylyltransferase OS=Staphylococcus epidermidis (strain ATCC 12228 / FDA PCI 1200) OX=176280 GN=nadD PE=3 SV=1	nadD	22.424	17.3	4	4	4	1.114	0.932	0.889	1.002	1.078	1.032	0.876	0.0317352
D4FJP3	Coenzyme A biosynthesis bifunctional protein CoaBC OS=Staphylococcus epidermidis M23864:W2(grey) OX=525375 GN=coaBC PE=3 SV=1	coaBC	44.021	44.4	12	10	30	0.954	0.989	1.017	1.052	0.993	0.996	1.039	0.166468
Q5HNX0	Uncharacterized protein OS=Staphylococcus epidermidis (strain ATCC 35984 / RP62A) OX=176279 GN=SERP1144 PE=4 SV=1	SERP1144	50.986	42.4	15	15	38	1.002	0.995	1.01	1.014	1.009	1.023	0.995	0.586588
D4FN05	Uncharacterized protein OS=Staphylococcus epidermidis M23864:W2(grey) OX=525375 GN=HMPREF0794_1943 PE=4 SV=1	HMPREF0794_1943	89.115	7.2	5	1	10	0.505	0.756	1.82	1.659	0.554	0.589	2.57	0.0360806
Q8CNC7	Urease accessory protein UreF OS=Staphylococcus epidermidis (strain ATCC 12228 / FDA PCI 1200) OX=176280 GN=ureF PE=3 SV=1	ureF	26.716	21.8	4	4	9	1.026	1.01	1.002	0.936	1.003	1.059	0.955	0.180415
D4FJU0	Succinate dehydrogenase flavoprotein subunit OS=Staphylococcus epidermidis M23864:W2(grey) OX=525375 GN=sdhA PE=3 SV=1	sdhA	65.659	65	32	13	75	1.006	1.006	0.994	1.007	0.984	1.006	1.004	0.684686
Q8CS61	Putative universal stress protein SE_1385 OS=Staphylococcus epidermidis (strain ATCC 12228 / FDA PCI 1200) OX=176280 GN=SE_1385 PE=3 SV=1	SE_1385	18.423	71.7	10	1	107	0.916	1.083	1.117	1.077	0.872	0.904	1.217	0.000450026
Q8CNV9	Formate--tetrahydrofolate ligase OS=Staphylococcus epidermidis (strain ATCC 12228 / FDA PCI 1200) OX=176280 GN=fhs PE=3 SV=1	fhs	60.339	48.8	24	23	74	1.099	0.933	0.955	0.919	1.062	1.087	0.864	0.00063471
Q8CPH2	Methylenetetrahydrofolate--tRNA-(uracil-5-)-methyltransferase TrmFO OS=Staphylococcus epidermidis (strain ATCC 12228 / FDA PCI 1200) OX=176280 GN=trmFO PE=3 SV=1	trmFO	48.725	59.3	22	22	44	0.98	0.998	1.01	1.055	1.016	0.979	1.03	0.235993
Q5HS26	Yip1 domain-containing protein OS=Staphylococcus epidermidis (strain ATCC 35984 / RP62A) OX=176279 GN=SERP0013 PE=4 SV=1	SERP0013	23.09	8.1	1	1	1
Q8CU52	Alkylmercury lyase OS=Staphylococcus epidermidis (strain ATCC 12228 / FDA PCI 1200) OX=176280 GN=merB PE=3 SV=1	merB	23.594	29.6	3	3	8	1.01	0.95	1.004	1.058	0.988	1	1.005	0.912004
A0A0E1VPT3	Hypoxanthine phosphoribosyltransferase OS=Staphylococcus epidermidis W23144 OX=525376 GN=hpt PE=3 SV=1	hpt	85.327	15.1	15	15	51	1	1.036	1.005	0.986	0.979	0.982	1.022	0.239635
A0A0E1VG65	ATP synthase subunit c OS=Staphylococcus epidermidis W23144 OX=525376 GN=atpE PE=3 SV=1	atpE	70.204	3.2	2	1	5	0.931	1.031	1.004	1.054	1.038	0.958	1.055	0.197573
A0A509LV09	Uncharacterized protein OS=Staphylococcus epidermidis OX=1282 GN=D9V05_01045 PE=4 SV=1	D9V05_01045	13.462	9.5	1	1	1	0.711	1.211	1.464	1.24	0.494	0.781	1.971	0.0102845
Q5HMA1	Transcription termination factor Rho OS=Staphylococcus epidermidis (strain ATCC 35984 / RP62A) OX=176279 GN=rho PE=3 SV=1	rho	49.792	61.6	20	20	51	0.97	1.018	1.055	1.04	0.958	0.97	1.074	0.00306499
A0A2G7HXJ9	Cof-type HAD-IIB family hydrolase OS=Staphylococcus epidermidis OX=1282 GN=CP553_04180 PE=4 SV=1	CP553_04180	32.76	46.3	9	9	54	1.02	0.982	1.008	0.981	1.018	1.01	0.975	0.0521825
Q5HQ86	Histidine-containing protein OS=Staphylococcus epidermidis (strain ATCC 35984 / RP62A) OX=176279 GN=ptsH PE=4 SV=1	ptsH	9.5126	89.8	7	7	177	0.942	1.046	1.102	0.951	0.952	0.972	1.081	0.158341
Q8CPN9	Phosphoribosylformylglycinamidine synthase subunit PurL OS=Staphylococcus epidermidis (strain ATCC 12228 / FDA PCI 1200) OX=176280 GN=purL PE=3 SV=1	purL	79.732	59.9	31	1	65	1.043	0.816	1.078	0.84	1.146	1.127	0.824	0.0977699
A0A7I0BN24	Uncharacterized protein OS=Staphylococcus epidermidis OX=1282 GN=E1N00_06650 PE=4 SV=1	E1N00_06650	34.97	46	12	1	33
Q5HMI8	Lysostaphin OS=Staphylococcus epidermidis (strain ATCC 35984 / RP62A) OX=176279 GN=SERP1640 PE=3 SV=1	SERP1640	304.28	1.7	5	5	5	1.037	0.992	0.964	0.887	0.97	1.062	0.926	0.149358
A0A7I0ASL9	ATP-grasp domain-containing protein OS=Staphylococcus epidermidis OX=1282 GN=CP553_04280 PE=4 SV=1	CP553_04280	45.59	37.9	14	3	21	0.929	1.122	1.042	1.09	0.9	0.91	1.188	0.00184034
Q5HGD2	Glycerol kinase OS=Staphylococcus aureus (strain COL) OX=93062 GN=glpK PE=1 SV=1	glpK	55.625	14.3	7	1	21	0.681	1.227	1.497	0.887	0.762	0.879	1.555	0.0664724
Q8CRH2	50S ribosomal protein L5 OS=Staphylococcus epidermidis (strain ATCC 12228 / FDA PCI 1200) OX=176280 GN=rplE PE=3 SV=1	rplE	20.235	76	17	17	132	0.952	1.054	1.054	1.054	0.945	0.933	1.117	4.67137e-05
A0A6N4J108	mRNA interferase OS=Staphylococcus epidermidis OX=1282 GN=E1N09_00320 PE=3 SV=1	E1N09_00320	12.468	54.1	4	4	6	1.146	0.917	0.914	0.909	1.053	1.09	0.833	0.00180717
Q5HN72	NADH-dependent peroxiredoxin OS=Staphylococcus epidermidis (strain ATCC 35984 / RP62A) OX=176279 GN=bcp PE=4 SV=1	bcp	37.344	40.2	12	2	46	0.881	1.11	1.072	1.268	0.78	0.801	1.401	0.00598448
A0A0E1VG87	Uncharacterized protein OS=Staphylococcus epidermidis W23144 OX=525376 GN=HMPREF0791_0755 PE=4 SV=1	HMPREF0791_0755	7.7025	32.9	2	1	3	0.918	1.096	1.178	0.878	0.912	1.011	1.109	0.361078
Q5HHP1	Enolase OS=Staphylococcus aureus (strain COL) OX=93062 GN=eno PE=3 SV=1	eno	47.116	50.7	15	4	204
A0A0E1VH16	30S ribosomal protein S7 OS=Staphylococcus epidermidis W23144 OX=525376 GN=rpsG PE=3 SV=1	rpsG	115.86	38.2	38	9	184	0.916	1.068	1.07	1.078	0.923	0.92	1.166	1.8212e-06
Q5HNQ1	Uncharacterized protein OS=Staphylococcus epidermidis (strain ATCC 35984 / RP62A) OX=176279 GN=SERP1214 PE=4 SV=1	SERP1214	5.518	65.2	7	7	25	1.08	0.989	0.96	0.949	1.06	0.987	0.927	0.0660796
D4FMD7	Lipid II isoglutaminyl synthase (glutamine-hydrolyzing) subunit MurT OS=Staphylococcus epidermidis M23864:W2(grey) OX=525375 GN=murT PE=3 SV=1	murT	49.13	70.5	30	30	93	0.99	1.03	1.022	1.048	0.977	0.976	1.053	0.00399865
P0C0R4	Lipase OS=Staphylococcus epidermidis (strain ATCC 12228 / FDA PCI 1200) OX=176280 GN=lip PE=3 SV=1	lip	77.342	42.9	26	22	57	1.045	0.985	0.935	0.998	1	1.015	0.954	0.114666
Q8CMU9	Protein translocase subunit SecA 2 OS=Staphylococcus epidermidis (strain ATCC 12228 / FDA PCI 1200) OX=176280 GN=secA2 PE=3 SV=1	secA2	91.213	2.6	2	2	2	0.99	0.998	1.053	1.02	0.968	0.984	1.044	0.0654584
A0A0N1EXR8	MarR family transcriptional regulator OS=Staphylococcus epidermidis OX=1282 GN=ATM22_01250 PE=4 SV=1	ATM22_01250	17.473	44.6	6	1	8	0.997	1.051	0.999	0.982	1.014	0.977	1.015	0.568098
Q8CN17	D-ribose pyranase OS=Staphylococcus epidermidis (strain ATCC 12228 / FDA PCI 1200) OX=176280 GN=rbsD PE=3 SV=1	rbsD	14.995	56	8	8	21	1.065	0.971	0.926	0.929	1.053	1.066	0.888	0.00164077
Q8CRQ8	Redox-sensing transcriptional repressor Rex OS=Staphylococcus epidermidis (strain ATCC 12228 / FDA PCI 1200) OX=176280 GN=rex PE=3 SV=1	rex	23.829	40.3	6	6	11	1.174	0.876	0.828	0.988	1.158	1.034	0.8	0.0269884
Q5HR33	N-acetylglucosamine-6-phosphate deacetylase OS=Staphylococcus epidermidis (strain ATCC 35984 / RP62A) OX=176279 GN=nagA PE=3 SV=1	nagA	42.462	33.1	9	9	16	1.027	0.985	0.985	0.986	1.035	1.059	0.947	0.00417071
D4FKL5	TIGR00245 family protein OS=Staphylococcus epidermidis M23864:W2(grey) OX=525375 GN=HMPREF0794_1103 PE=3 SV=1	HMPREF0794_1103	49.052	15.8	7	2	11	0.942	1.029	1.15	0.998	0.89	0.987	1.127	0.0865683
A0A7I0AL81	Phenylalanine--tRNA ligase beta subunit OS=Staphylococcus epidermidis OX=1282 GN=pheT PE=3 SV=1	pheT	89.374	29.8	20	1	58	1.138	0.826	0.843	0.935	1.153	1.171	0.752	0.00188074
D4FML3	DUF536 domain-containing protein OS=Staphylococcus epidermidis M23864:W2(grey) OX=525375 GN=HMPREF0794_1801 PE=4 SV=1	HMPREF0794_1801	26.686	5.8	2	2	3	0.88	1.09	1.164	0.983	0.933	0.94	1.176	0.0401624
Q8L2R3	Glyceraldehyde-3-phosphate dehydrogenase (Fragment) OS=Staphylococcus epidermidis OX=1282 GN=gap PE=3 SV=1	gap	33.363	45.8	12	2	248
A0A0E1VN01	Cation diffusion facilitator family transporter OS=Staphylococcus epidermidis W23144 OX=525376 GN=HMPREF0791_0703 PE=4 SV=1	HMPREF0791_0703	95.537	2.7	2	1	2
Q8CTR6	GTP cyclohydrolase FolE2 OS=Staphylococcus epidermidis (strain ATCC 12228 / FDA PCI 1200) OX=176280 GN=folE2 PE=3 SV=1	folE2	33.634	52.1	13	1	24	1.104	0.932	0.846	0.992	1.122	1.056	0.844	0.0261383
A0A0H2VK98	Uncharacterized protein OS=Staphylococcus epidermidis (strain ATCC 12228 / FDA PCI 1200) OX=176280 GN=SE_p302 PE=4 SV=1	SE_p302	8.3942	40	4	4	22	0.949	1.027	1.066	0.995	0.965	0.976	1.069	0.0375199
D2JC05	Mercuric transport protein OS=Staphylococcus epidermidis OX=1282 GN=SAP105A_001 PE=4 SV=1	SAP105A_001	90.69	26.3	16	16	29	0.96	1.031	1.008	1.038	0.976	0.964	1.061	0.00432566
Q8CNY4	Trigger factor OS=Staphylococcus epidermidis (strain ATCC 12228 / FDA PCI 1200) OX=176280 GN=tig PE=3 SV=1	tig	48.731	60.3	27	27	324	0.994	1.006	0.999	1.007	1.001	1.011	1.002	0.734071
Q5HI88	Phosphate acetyltransferase OS=Staphylococcus aureus (strain COL) OX=93062 GN=pta PE=3 SV=1	pta	34.951	22.6	3	2	20	1.033	0.976	0.861	0.947	1.094	1.068	0.871	0.0282178
A0A1U9X4C2	Lactose phosphotransferase system repressor OS=Staphylococcus epidermidis OX=1282 GN=aadE PE=4 SV=1	aadE	28.247	3.8	1	1	1	1.168	0.894	0.818	0.94	1.129	1.116	0.777	0.0040854
Q5HN66	Adenine DNA glycosylase OS=Staphylococcus epidermidis (strain ATCC 35984 / RP62A) OX=176279 GN=mutY PE=3 SV=1	mutY	41.066	33.4	9	9	14	0.982	1.017	0.997	1.005	0.99	0.994	1.018	0.0596061
Q5HQA8	Chitinase-related protein OS=Staphylococcus epidermidis (strain ATCC 35984 / RP62A) OX=176279 GN=SERP0647 PE=4 SV=1	SERP0647	11.41	49.5	5	5	9	0.946	1.06	1.059	0.985	0.939	0.996	1.077	0.0718673
A0A0K0PS88	Nuclease SbcCD subunit C OS=Staphylococcus epidermidis OX=1282 PE=3 SV=1	--	105.16	1.1	1	1	2
Q8CRJ1	Lactose phosphotransferase system repressor OS=Staphylococcus epidermidis (strain ATCC 12228 / FDA PCI 1200) OX=176280 GN=lacR PE=3 SV=1	lacR	28.657	55.8	10	10	15	0.959	1.032	1.016	1.02	0.95	1.006	1.052	0.0485537
Q8CPV5	Type II NADH:quinone oxidoreductase OS=Staphylococcus epidermidis (strain ATCC 12228 / FDA PCI 1200) OX=176280 GN=SE_0635 PE=3 SV=1	SE_0635	44.255	48.5	16	13	95	1.046	0.949	0.946	1.024	1.034	1.004	0.946	0.1245
Q5HP84	MazG domain-containing protein OS=Staphylococcus epidermidis (strain ATCC 35984 / RP62A) OX=176279 GN=SERP1029 PE=4 SV=1	SERP1029	12.288	44.8	4	4	10	0.917	0.96	0.97	0.943	1.002	1.008	0.982	0.604965
Q5HGP6	Cell division protein FtsA OS=Staphylococcus aureus (strain COL) OX=93062 GN=ftsA PE=3 SV=1	ftsA	52.934	16.2	7	1	16
Q5HNI1	D-3-phosphoglycerate dehydrogenase OS=Staphylococcus epidermidis (strain ATCC 35984 / RP62A) OX=176279 GN=serA PE=3 SV=1	serA	191.34	13.5	19	16	30	0.913	1.068	1.04	1.05	0.926	0.943	1.135	0.000478136
A0A0H2VGN9	Transcription repressor of fructose operon OS=Staphylococcus epidermidis (strain ATCC 12228 / FDA PCI 1200) OX=176280 GN=SE_0470 PE=4 SV=1	SE_0470	28.453	38.9	10	4	21	0.94	1.08	1.116	1.057	0.888	0.954	1.169	0.00436919
A0A0H2VGU2	Aldehyde-alcohol dehydrogenase OS=Staphylococcus epidermidis (strain ATCC 12228 / FDA PCI 1200) OX=176280 GN=SE_0506 PE=3 SV=1	SE_0506	95.598	75.4	51	5	362	1.108	0.938	0.815	0.98	1.094	1.116	0.824	0.0243893
Q5HGD6	DNA mismatch repair protein MutS OS=Staphylococcus aureus (strain COL) OX=93062 GN=mutS PE=3 SV=1	mutS	99.902	14.2	17	1	39	0.832	1.091	1.226	1.045	0.864	0.916	1.287	0.0105293
A0A0E1VH80	CDP-glycerol:poly(Glycerophosphate) glycerophosphotransferase OS=Staphylococcus epidermidis W23144 OX=525376 GN=HMPREF0791_0417 PE=3 SV=1	HMPREF0791_0417	211.07	6.2	12	1	24	1.094	0.945	0.921	0.913	1.13	1.048	0.849	0.00251341
Q5HLQ2	DUF4097 domain-containing protein OS=Staphylococcus epidermidis (strain ATCC 35984 / RP62A) OX=176279 GN=SERP1932 PE=4 SV=1	SERP1932	30.276	3.4	1	1	1
Q8CNC8	Urease accessory protein UreE OS=Staphylococcus epidermidis (strain ATCC 12228 / FDA PCI 1200) OX=176280 GN=ureE PE=3 SV=1	ureE	17.497	62.7	9	9	45	1.108	0.877	0.857	0.856	1.177	1.157	0.752	0.000132478
A0A0H2WWU9	2-oxoisovalerate dehydrogenase subunit alpha OS=Staphylococcus aureus (strain COL) OX=93062 GN=SACOL1562 PE=3 SV=1	SACOL1562	89.627	4	3	1	7	0.952	0.993	1.094	1.117	0.904	0.938	1.147	0.026065
A0A5R1C305	Alanine--tRNA ligase OS=Staphylococcus epidermidis OX=1282 GN=alaS PE=3 SV=1	alaS	99.449	64	45	9	140	0.987	1.04	1.018	0.998	0.983	0.984	1.035	0.0475654
A0A7G9EBD9	DUF218 domain-containing protein OS=Staphylococcus epidermidis OX=1282 GN=ATM22_02495 PE=4 SV=1	ATM22_02495	36.575	7.5	1	1	1	0.944	0.967	1.041	1.071	0.945	1.04	1.051	0.321057
Q5HP33	DNA repair protein RecN OS=Staphylococcus epidermidis (strain ATCC 35984 / RP62A) OX=176279 GN=recN PE=3 SV=1	recN	159.79	25.2	33	22	77	1.076	0.925	0.895	0.952	1.062	1.098	0.857	0.00158115
Q8CTU3	Glutamate--tRNA ligase OS=Staphylococcus epidermidis (strain ATCC 12228 / FDA PCI 1200) OX=176280 GN=gltX PE=3 SV=1	gltX	56.369	65.7	30	30	137	1.049	0.982	0.964	0.989	1.01	1.004	0.958	0.0535849
Q5HPB3	Peptide methionine sulfoxide reductase MsrA OS=Staphylococcus epidermidis (strain ATCC 35984 / RP62A) OX=176279 GN=msrA-2 PE=3 SV=1	msrA-2	20.043	45.4	10	4	48	1.052	0.975	0.928	0.938	1.074	1.062	0.891	0.00202891
Q8CS98	Histidine--tRNA ligase OS=Staphylococcus epidermidis (strain ATCC 12228 / FDA PCI 1200) OX=176280 GN=hisS PE=3 SV=1	hisS	48.834	41	15	15	41	1.004	1.018	0.964	0.999	1.016	0.997	0.988	0.509493
Q5HPR0	ACT domain protein OS=Staphylococcus epidermidis (strain ATCC 35984 / RP62A) OX=176279 GN=SERP0848 PE=4 SV=1	SERP0848	31.818	25.8	6	6	11	1.006	0.989	0.975	0.966	1.028	1.015	0.961	0.0127673
Q5HLE1	Exopolyphosphatase OS=Staphylococcus epidermidis (strain ATCC 35984 / RP62A) OX=176279 GN=SERP2046 PE=3 SV=1	SERP2046	58.234	34.9	17	17	27	1.006	0.993	0.969	0.971	1.018	1.003	0.969	0.0251276
Q8CTJ6	Undecaprenyl-diphosphatase OS=Staphylococcus epidermidis (strain ATCC 12228 / FDA PCI 1200) OX=176280 GN=uppP PE=3 SV=1	uppP	32.211	13.8	3	3	6	0.946	0.987	1.014	0.957	0.978	1.033	1	0.982388
Q7ZAJ3	Segregation and condensation protein B OS=Staphylococcus epidermidis (strain ATCC 12228 / FDA PCI 1200) OX=176280 GN=scpB PE=3 SV=1	scpB	20.221	43.9	7	7	15	1.076	0.974	0.836	0.984	1.089	1.071	0.863	0.0475898
Q8CP71	3'-5' exonuclease DinG OS=Staphylococcus epidermidis (strain ATCC 12228 / FDA PCI 1200) OX=176280 GN=dinG PE=3 SV=1	dinG	105.33	21.4	18	3	26	1.043	0.971	0.974	1.025	0.999	1.031	0.966	0.19087
A0A0H2VKD5	DNA-invertase OS=Staphylococcus epidermidis (strain ATCC 12228 / FDA PCI 1200) OX=176280 GN=SE_p509 PE=3 SV=1	SE_p509	18.593	31.3	6	2	15
D4FIU5	Diaminopimelate decarboxylase OS=Staphylococcus epidermidis M23864:W2(grey) OX=525375 GN=lysA PE=3 SV=1	lysA	46.65	53.2	16	1	39	0.856	0.935	1.258	1.118	0.951	0.872	1.236	0.0895967
Q5HI31	Teichoic acids export ATP-binding protein TagH OS=Staphylococcus aureus (strain COL) OX=93062 GN=tagH PE=3 SV=1	tagH	29.762	2.7	1	1	1
A0A0H2VJL7	Acyltransferase OS=Staphylococcus epidermidis (strain ATCC 12228 / FDA PCI 1200) OX=176280 GN=SE_2125 PE=3 SV=1	SE_2125	69.337	17.3	9	1	15	0.884	1.073	0.991	1.175	0.922	0.946	1.177	0.0385983
Q5HLJ5	Transcriptional regulator NirR OS=Staphylococcus epidermidis (strain ATCC 35984 / RP62A) OX=176279 GN=nirR PE=4 SV=1	nirR	27.312	18.8	5	5	7	1.053	0.988	1.002	1.005	1.022	0.996	0.975	0.216136
A0A7I0AJ03	Tetratricopeptide repeat protein OS=Staphylococcus epidermidis OX=1282 GN=E1N03_09820 PE=4 SV=1	E1N03_09820	48.369	27.3	7	1	14
Q5HRR3	Ribonuclease M5 OS=Staphylococcus epidermidis (strain ATCC 35984 / RP62A) OX=176279 GN=rnmV PE=3 SV=1	rnmV	20.404	55.8	9	9	14	0.905	1.076	1.086	1.104	0.908	0.909	1.2	1.82425e-05
A0A0H2X005	FtsK/SpoIIIE family protein OS=Staphylococcus aureus (strain COL) OX=93062 GN=SACOL1791 PE=3 SV=1	SACOL1791	144.65	6.9	10	1	23	0.845	1.114	1.053	1.037	0.972	0.971	1.149	0.0518734
A0A0E1VH70	Elongation factor Tu OS=Staphylococcus epidermidis W23144 OX=525376 GN=tuf PE=3 SV=1	tuf	45.335	84.2	30	6	705	0.873	1.073	1.152	1	0.897	0.934	1.193	0.0181482
A0A7H5C972	DNA mismatch repair protein MutL OS=Staphylococcus epidermidis OX=1282 GN=mutL PE=3 SV=1	mutL	73.653	38	22	1	49
A0A0E1VJS4	Uncharacterized protein OS=Staphylococcus epidermidis W23144 OX=525376 GN=HMPREF0791_1802 PE=4 SV=1	HMPREF0791_1802	17.394	13.2	3	3	3	1.137	0.885	0.974	0.74	1.173	1.157	0.75	0.0220723
Q8CNF3	Protein translocase subunit SecY OS=Staphylococcus epidermidis (strain ATCC 12228 / FDA PCI 1200) OX=176280 GN=secY PE=3 SV=1	secY	47.419	6.7	4	4	5	1.194	0.835	0.756	1.061	1.143	1.081	0.776	0.0656395
Q8CQV8	Pyridoxal 5'-phosphate synthase subunit PdxT OS=Staphylococcus epidermidis (strain ATCC 12228 / FDA PCI 1200) OX=176280 GN=pdxT PE=3 SV=1	pdxT	20.68	51.4	9	9	14	0.943	1.062	1.04	0.997	1.01	0.971	1.06	0.0993066
D4FLE1	Triacylglycerol lipase OS=Staphylococcus epidermidis M23864:W2(grey) OX=525375 GN=HMPREF0794_1379 PE=4 SV=1	HMPREF0794_1379	81.702	13.5	11	7	15	1.07	0.867	0.949	1.021	1.054	1.072	0.888	0.0633022
D4FMU5	Uncharacterized protein OS=Staphylococcus epidermidis M23864:W2(grey) OX=525375 GN=HMPREF0794_1883 PE=4 SV=1	HMPREF0794_1883	13.631	21	1	1	1	1.029	0.992	1.025	1.029	1.005	0.943	1.023	0.457275
Q8CPX1	3-dehydroquinate dehydratase OS=Staphylococcus epidermidis (strain ATCC 12228 / FDA PCI 1200) OX=176280 GN=aroD PE=3 SV=1	aroD	26.944	29	7	7	11	0.976	0.993	0.994	0.954	1.031	1.027	0.969	0.235859
A0A2G7I1Y5	N-acetyl-alpha-D-glucosaminyl L-malate synthase BshA OS=Staphylococcus epidermidis OX=1282 GN=bshA PE=4 SV=1	bshA	43.076	46.1	13	4	31	0.997	0.971	0.984	0.959	1.06	1.014	0.949	0.0571971
Q5HRF3	Phosphomevalonate kinase OS=Staphylococcus epidermidis (strain ATCC 35984 / RP62A) OX=176279 GN=SERP0240 PE=4 SV=1	SERP0240	77.715	20.9	14	11	28	0.998	1.025	1.016	0.994	1.014	0.988	1.012	0.384188
Q5HNA8	Uncharacterized protein OS=Staphylococcus epidermidis (strain ATCC 35984 / RP62A) OX=176279 GN=SERP1362 PE=4 SV=1	SERP1362	114.53	2.5	2	1	2
Q8CSD1	UPF0365 protein SE_1260 OS=Staphylococcus epidermidis (strain ATCC 12228 / FDA PCI 1200) OX=176280 GN=SE_1260 PE=3 SV=1	SE_1260	35.173	46.8	12	4	69	0.934	1.045	1.007	0.99	1.018	0.966	1.042	0.230399
Q5HKT5	Acetoin(diacetyl) reductase OS=Staphylococcus epidermidis (strain ATCC 35984 / RP62A) OX=176279 GN=SERP2257 PE=3 SV=1	SERP2257	139.12	25.2	26	15	233	1.066	0.957	0.933	0.966	1.06	1.055	0.898	0.000566219
A0A7I0AMQ6	EIIA OS=Staphylococcus epidermidis OX=1282 GN=E1N03_02635 PE=4 SV=1	E1N03_02635	68.781	30.5	14	14	41	0.948	1.035	1.052	1.003	0.957	0.955	1.08	0.0056902
D4FIC2	DRTGG domain protein OS=Staphylococcus epidermidis M23864:W2(grey) OX=525375 GN=HMPREF0794_0310 PE=4 SV=1	HMPREF0794_0310	48.438	41.7	16	15	29	0.986	0.996	1.005	0.981	1.04	1.016	0.98	0.309477
Q8CSR9	Glutathione peroxidase homolog BsaA OS=Staphylococcus epidermidis (strain ATCC 12228 / FDA PCI 1200) OX=176280 GN=bsaA PE=3 SV=1	bsaA	18.22	74.1	10	10	73	1.068	0.949	0.98	0.942	1.06	1.05	0.903	0.00148145
Q5HQZ1	UDP-N-acetylenolpyruvoylglucosamine reductase OS=Staphylococcus epidermidis (strain ATCC 35984 / RP62A) OX=176279 GN=murB PE=3 SV=1	murB	33.38	58.8	14	14	33	0.981	0.999	1.011	0.997	0.994	1.003	1.01	0.279543
Q8CPM1	Protoheme IX farnesyltransferase OS=Staphylococcus epidermidis (strain ATCC 12228 / FDA PCI 1200) OX=176280 GN=ctaB PE=3 SV=2	ctaB	33.62	6.3	2	2	2	0.772	1.202	1.171	1.238	0.745	0.821	1.544	0.000182173
A0A7I0AK82	Bifunctional autolysin OS=Staphylococcus epidermidis OX=1282 GN=E1N03_07375 PE=3 SV=1	E1N03_07375	149.52	45.2	48	1	262
A0A7I0A4M2	Uncharacterized protein OS=Staphylococcus epidermidis OX=1282 GN=E1N12_10365 PE=4 SV=1	E1N12_10365	11.574	22.4	2	2	2
A0A7I0AWP0	Micrococcal nuclease OS=Staphylococcus epidermidis OX=1282 GN=E1M98_11505 PE=4 SV=1	E1M98_11505	20.75	37.6	7	7	10	0.946	1.039	1.05	1.062	1.009	0.986	1.071	0.0252846
Q8CRU4	Aspartyl/glutamyl-tRNA(Asn/Gln) amidotransferase subunit B OS=Staphylococcus epidermidis (strain ATCC 12228 / FDA PCI 1200) OX=176280 GN=gatB PE=3 SV=1	gatB	53.609	73.3	31	31	209	1.002	0.988	0.996	1.004	1.024	1.003	0.986	0.183338
Q8CTN9	Arginine--tRNA ligase OS=Staphylococcus epidermidis (strain ATCC 12228 / FDA PCI 1200) OX=176280 GN=argS PE=3 SV=1	argS	62.535	70.2	32	8	109	0.904	1.037	1.066	0.99	0.951	1.001	1.083	0.0930923
D4FLW4	YozE_SAM_like domain-containing protein OS=Staphylococcus epidermidis M23864:W2(grey) OX=525375 GN=HMPREF0794_1552 PE=4 SV=1	HMPREF0794_1552	51.53	29.1	11	2	29	0.917	1.077	1.087	1.052	0.918	0.93	1.163	0.00014841
Q8CMQ7	Inosine-5'-monophosphate dehydrogenase OS=Staphylococcus epidermidis (strain ATCC 12228 / FDA PCI 1200) OX=176280 GN=guaB PE=3 SV=1	guaB	52.622	78.7	33	1	143	1.018	1.002	0.977	1.025	1.003	0.994	0.996	0.818468
Q5HNM7	Uncharacterized protein OS=Staphylococcus epidermidis (strain ATCC 35984 / RP62A) OX=176279 GN=SERP1240 PE=4 SV=1	SERP1240	97.134	8.4	7	1	12	0.92	1.091	1.066	1.131	0.859	0.918	1.219	0.00219485
D4FNV8	Glutamate dehydrogenase OS=Staphylococcus epidermidis M23864:W2(grey) OX=525375 GN=gluD PE=3 SV=1	gluD	45.784	52.4	16	16	57	1.061	0.964	0.943	0.959	1.057	1.055	0.903	0.000119546
Q8CSY0	Uncharacterized N-acetyltransferase SE_0851 OS=Staphylococcus epidermidis (strain ATCC 12228 / FDA PCI 1200) OX=176280 GN=SE_0851 PE=3 SV=1	SE_0851	17.077	67.1	8	1	22	0.761	1.327	1.73	0.561	0.675	0.874	1.566	0.369893
A0A2T4LHP3	Cof-type HAD-IIB family hydrolase OS=Staphylococcus epidermidis OX=1282 GN=D9V05_09830 PE=4 SV=1	D9V05_09830	32.04	59.9	13	2	58	1.069	0.95	0.93	0.983	1.094	1.063	0.887	0.00288417
D4FNS7	Acid sugar phosphatase OS=Staphylococcus epidermidis M23864:W2(grey) OX=525375 GN=HMPREF0794_2215 PE=3 SV=1	HMPREF0794_2215	166.4	45.2	49	1	266	1.048	0.939	0.906	0.945	1.09	1.116	0.857	0.002421
Q5HMY5	Accessory gene regulator protein B OS=Staphylococcus epidermidis (strain ATCC 35984 / RP62A) OX=176279 GN=agrB PE=3 SV=1	agrB	22.573	11.9	2	2	2
A0A0E1VGX5	Uncharacterized protein OS=Staphylococcus epidermidis W23144 OX=525376 GN=HMPREF0791_0484 PE=4 SV=1	HMPREF0791_0484	65.305	3.1	2	1	5
A0A7I0C067	Zinc ribbon domain-containing protein OS=Staphylococcus epidermidis OX=1282 GN=E1M98_01445 PE=4 SV=1	E1M98_01445	28.501	10.8	3	3	3	0.971	1.048	1.074	0.918	0.93	1.068	1.024	0.736242
A0A0E1VAW4	Uncharacterized protein OS=Staphylococcus epidermidis W23144 OX=525376 GN=HMPREF0791_2022 PE=4 SV=1	HMPREF0791_2022	81.519	19.9	16	1	37	0.892	1.082	1.104	1.007	0.954	0.958	1.139	0.0232239
C3RY87	Heat shock protein 60 (Fragment) OS=Staphylococcus epidermidis OX=1282 GN=hsp60 PE=4 SV=1	hsp60	18.533	85.9	14	1	78
D4FNM7	Uncharacterized protein OS=Staphylococcus epidermidis M23864:W2(grey) OX=525375 GN=HMPREF0794_2165 PE=4 SV=1	HMPREF0794_2165	8.8849	63.6	4	1	5	0.905	1.025	1.26	0.913	0.825	1.055	1.148	0.319468
A0A0H2WW14	Uncharacterized protein OS=Staphylococcus aureus (strain COL) OX=93062 GN=SACOL1480 PE=4 SV=1	SACOL1480	133.11	3.8	4	1	9	1.18	0.928	0.755	0.957	1.177	1.074	0.769	0.0297589
D4FJS1	Cell division protein DivIB OS=Staphylococcus epidermidis M23864:W2(grey) OX=525375 GN=divIB PE=3 SV=1	divIB	53.794	38.5	17	17	37	1.059	0.986	0.965	0.97	1.055	1.023	0.931	0.0049986
A0A7I0B7G9	Uncharacterized protein (Fragment) OS=Staphylococcus epidermidis OX=1282 GN=E1N10_09780 PE=4 SV=1	E1N10_09780	4.8543	64.3	6	6	46	0.859	1.122	1.162	1.132	0.842	0.839	1.345	2.07664e-05
Q8CPY8	Thioredoxin reductase OS=Staphylococcus epidermidis (strain ATCC 12228 / FDA PCI 1200) OX=176280 GN=trxB PE=3 SV=1	trxB	33.544	76.5	18	1	96	0.951	1.043	1.152	0.988	0.96	0.976	1.103	0.104012
A0A7I0ANT4	Glycerophosphodiester phosphodiesterase OS=Staphylococcus epidermidis OX=1282 GN=E1N03_01330 PE=4 SV=1	E1N03_01330	28.858	57.7	14	1	44	1.151	0.881	0.726	1.074	1.135	1.088	0.795	0.101297
D4FNT8	Iron-sulfur cluster assembly accessory protein OS=Staphylococcus epidermidis M23864:W2(grey) OX=525375 GN=HMPREF0794_2226 PE=4 SV=1	HMPREF0794_2226	12.575	20.2	2	2	4	1.033	0.922	0.889	1.063	1.056	1.034	0.92	0.192756
Q5HQ58	Uncharacterized protein OS=Staphylococcus epidermidis (strain ATCC 35984 / RP62A) OX=176279 GN=SERP0699 PE=4 SV=1	SERP0699	6.056	70.6	4	4	12	1.089	0.954	0.958	0.887	1.07	1.096	0.86	0.00432693
Q5HLA4	Glyoxalase family protein OS=Staphylococcus epidermidis (strain ATCC 35984 / RP62A) OX=176279 GN=SERP2083 PE=3 SV=1	SERP2083	30.346	33.2	5	5	10	0.984	1.07	1.006	0.992	1.024	1.015	1.015	0.612378
Q5HQV7	Uncharacterized protein OS=Staphylococcus epidermidis (strain ATCC 35984 / RP62A) OX=176279 GN=SERP0439 PE=4 SV=1	SERP0439	23.254	30.6	4	3	21	1.031	0.97	0.93	0.98	1.06	1.024	0.925	0.0149224
A0A0E1VFE5	Aldehyde dehydrogenase OS=Staphylococcus epidermidis W23144 OX=525376 GN=ywdH PE=3 SV=1	ywdH	52.041	26.8	10	10	19	0.968	1.003	1.03	1.097	0.975	0.955	1.08	0.0487426
Q8CNH7	Deoxyribose-phosphate aldolase OS=Staphylococcus epidermidis (strain ATCC 12228 / FDA PCI 1200) OX=176280 GN=deoC PE=3 SV=1	deoC	23.491	86.8	15	14	154	0.995	1.014	1.01	0.986	1.004	1.018	0.998	0.840772
D4FME9	UPF0435 protein HMPREF0794_1737 OS=Staphylococcus epidermidis M23864:W2(grey) OX=525375 GN=HMPREF0794_1737 PE=3 SV=1	HMPREF0794_1737	47.426	28.6	11	4	30	0.979	0.992	1.009	1.019	0.994	1.011	1.012	0.378883
A0A7G9EDW9	Lysostaphin OS=Staphylococcus epidermidis OX=1282 GN=ATM22_07250 PE=3 SV=1	ATM22_07250	211.03	0.6	1	1	1
Q5HLH9	Cation efflux family protein OS=Staphylococcus epidermidis (strain ATCC 35984 / RP62A) OX=176279 GN=SERP2008 PE=4 SV=1	SERP2008	32.667	8.2	3	2	3	0.925	1.137	1.074	1.062	0.886	0.906	1.205	0.00162214
Q5HNM0	Primosomal protein DnaI OS=Staphylococcus epidermidis (strain ATCC 35984 / RP62A) OX=176279 GN=dnaI PE=4 SV=1	dnaI	105.79	44.5	38	2	96	1.005	0.981	1.028	1.037	1.026	0.942	1.025	0.471124
D4FJZ0	Peptide deformylase OS=Staphylococcus epidermidis M23864:W2(grey) OX=525375 GN=def PE=3 SV=1	def	75.094	17	11	1	80	0.838	1.01	1.088	1.057	0.877	0.822	1.244	0.00166553
Q8CT16	Ribonuclease J 1 OS=Staphylococcus epidermidis (strain ATCC 12228 / FDA PCI 1200) OX=176280 GN=rnj1 PE=1 SV=1	rnj1	62.05	58.4	26	9	69	1	0.972	0.964	0.986	1.014	1.039	0.957	0.0279734
A0A0H2VEK3	Transcriptional regulator tetR-family OS=Staphylococcus epidermidis (strain ATCC 12228 / FDA PCI 1200) OX=176280 GN=SE_0093 PE=4 SV=1	SE_0093	21.471	20.4	5	5	6	0.899	1.027	1.096	1.113	0.91	0.87	1.208	0.00255924
A0A0H2WZ34	Cell wall surface anchor family protein OS=Staphylococcus aureus (strain COL) OX=93062 GN=sasC PE=4 SV=1	sasC	238.27	0.5	1	1	2	0.837	1.07	1.292	1.176	0.588	0.974	1.475	0.0627328
D4FLH1	Pyruvate formate-lyase-activating enzyme OS=Staphylococcus epidermidis M23864:W2(grey) OX=525375 GN=pflA PE=3 SV=1	pflA	109.23	16.5	13	9	28	1.034	0.987	0.985	0.968	1.089	1.061	0.923	0.00795613
Q5HCU6	Fructose-bisphosphate aldolase class 1 OS=Staphylococcus aureus (strain COL) OX=93062 GN=fda PE=3 SV=3	fda	33.054	45.6	12	1	260
Q8CSV3	ATP-dependent DNA helicase RecG OS=Staphylococcus epidermidis (strain ATCC 12228 / FDA PCI 1200) OX=176280 GN=recG PE=3 SV=1	recG	78.085	28.3	15	15	33	1.01	1.007	1.028	0.987	1.012	0.995	1.002	0.910427
Q5HMX8	Sucrose operon repressor OS=Staphylococcus epidermidis (strain ATCC 35984 / RP62A) OX=176279 GN=scrR PE=4 SV=1	scrR	35.624	41.3	12	1	14	0.899	0.98	1.096	1.042	0.999	0.99	1.08	0.176147
Q5HRU3	Lipoprotein OS=Staphylococcus epidermidis (strain ATCC 35984 / RP62A) OX=176279 GN=SERP0099 PE=3 SV=1	SERP0099	30.848	56.2	13	12	22	0.952	1.015	1.028	1.064	0.924	0.924	1.11	0.00381732
Q1G110	CcrB OS=Staphylococcus epidermidis OX=1282 PE=4 SV=1	--	62.607	3	1	1	1
A0A7H5C807	Riboflavin biosynthesis protein RibBA OS=Staphylococcus epidermidis OX=1282 GN=ribB PE=3 SV=1	ribB	44.298	39.7	12	1	25
Q5HK05	ADP-dependent (S)-NAD(P)H-hydrate dehydratase OS=Staphylococcus epidermidis (strain ATCC 35984 / RP62A) OX=176279 GN=nnrD PE=3 SV=1	nnrD	29.6	36.5	9	9	17	1.029	0.909	0.924	0.94	1.05	1.066	0.882	0.000867497
A0A6N4IVX3	DUF445 family protein (Fragment) OS=Staphylococcus epidermidis OX=1282 GN=E1N09_10570 PE=4 SV=1	E1N09_10570	36.906	23.8	8	5	8	0.961	0.978	1.038	1.051	1.02	1.019	1.022	0.500164
Q8CRD9	N-acetylmuramic acid 6-phosphate etherase OS=Staphylococcus epidermidis (strain ATCC 12228 / FDA PCI 1200) OX=176280 GN=murQ PE=3 SV=1	murQ	32.17	56.6	12	4	22	1.031	0.982	0.968	0.965	1.043	1.024	0.941	0.00131532
A0A0H2WYF2	FeS assembly ATPase SufC OS=Staphylococcus aureus (strain COL) OX=93062 GN=SACOL0914 PE=3 SV=1	SACOL0914	28.275	58.9	14	2	72	0.909	1.046	1.186	0.912	0.934	1.012	1.101	0.328075
A0A7T9WUH1	FAD:protein FMN transferase OS=Staphylococcus epidermidis OX=1282 GN=I6I40_02250 PE=4 SV=1	I6I40_02250	33.756	14.3	3	3	3	1.016	1.021	1.124	0.915	0.986	0.975	1.028	0.711234
Q5HQE5	Uncharacterized protein OS=Staphylococcus epidermidis (strain ATCC 35984 / RP62A) OX=176279 GN=SERP0608 PE=4 SV=1	SERP0608	95.543	26.6	20	1	47	0.816	1.078	1.127	1.085	0.931	0.944	1.223	0.0138377
O07471	DNA topoisomerase (ATP-hydrolyzing) (Fragment) OS=Staphylococcus epidermidis OX=1282 GN=gyrA PE=4 SV=1	gyrA	14.524	47.7	6	1	14	1.216	0.867	0.744	0.986	1.133	1.126	0.747	0.0250205
D4FKJ0	Uncharacterized protein OS=Staphylococcus epidermidis M23864:W2(grey) OX=525375 GN=HMPREF0794_1078 PE=4 SV=1	HMPREF0794_1078	129.94	4.7	6	3	6	0.976	0.996	1.027	1.046	0.972	0.996	1.042	0.0623182
A0A509LNI4	Aminotransferase class V-fold PLP-dependent enzyme OS=Staphylococcus epidermidis OX=1282 GN=D9V05_12465 PE=3 SV=1	D9V05_12465	53.388	28.5	12	1	30	0.978	0.998	1.038	0.978	0.984	1.038	1.005	0.863794
A0A7G9EA53	Uncharacterized protein OS=Staphylococcus epidermidis OX=1282 GN=ATM22_00215 PE=4 SV=1	ATM22_00215	7.3965	28.3	1	1	3	1.013	0.929	0.994	1.006	1.102	0.993	0.942	0.218707
Q8CQ96	Probable malate:quinone oxidoreductase 2 OS=Staphylococcus epidermidis (strain ATCC 12228 / FDA PCI 1200) OX=176280 GN=mqo2 PE=3 SV=1	mqo2	56.221	51.6	23	12	98	0.92	1.059	1.08	0.995	0.922	0.945	1.125	0.0111206
A0A0H2VH53	Riboflavin biosynthesis protein RibD OS=Staphylococcus epidermidis (strain ATCC 12228 / FDA PCI 1200) OX=176280 GN=SE_1441 PE=3 SV=1	SE_1441	38.773	51.6	16	16	23	0.954	1.022	1.03	1.029	0.967	0.977	1.063	0.00111481
Q8CPN2	Pyruvate dehydrogenase E1 component subunit beta OS=Staphylococcus epidermidis (strain ATCC 12228 / FDA PCI 1200) OX=176280 GN=pdhB PE=3 SV=1	pdhB	35.293	80.9	26	1	265	1.012	1.016	1.002	0.997	0.983	1.016	1.001	0.911374
Q8CMZ9	Probable transglycosylase IsaA OS=Staphylococcus epidermidis (strain ATCC 12228 / FDA PCI 1200) OX=176280 GN=isaA PE=3 SV=1	isaA	24.547	42.6	6	6	318	1.103	0.901	0.891	0.932	1.078	1.098	0.831	0.000260632
Q5HIG6	tRNA(Ile)-lysidine synthase OS=Staphylococcus aureus (strain COL) OX=93062 GN=tilS PE=3 SV=1	tilS	51.291	2.1	1	1	1	0.882	1.087	1.202	1.057	0.89	0.864	1.269	0.00406503
D4FNP0	Uncharacterized protein OS=Staphylococcus epidermidis M23864:W2(grey) OX=525375 GN=HMPREF0794_2178 PE=4 SV=1	HMPREF0794_2178	66.241	39.3	18	2	104	1.182	0.851	0.723	1.019	1.197	1.105	0.744	0.0406908
E9KNR7	Uncharacterized protein ORF SE_0098 OS=Staphylococcus aureus OX=1280 GN=ORF SE_0098 PE=4 SV=1	ORF	24.226	31.6	6	6	10	1.169	0.919	0.847	1.001	1.032	1.05	0.851	0.0592972
D4FJN5	Non-specific serine/threonine protein kinase OS=Staphylococcus epidermidis M23864:W2(grey) OX=525375 GN=HMPREF0794_0773 PE=4 SV=1	HMPREF0794_0773	75.396	26.8	18	18	29	0.971	1.036	1.016	0.993	0.957	1.019	1.033	0.218621
Q8CST6	Ribosome maturation factor RimP OS=Staphylococcus epidermidis (strain ATCC 12228 / FDA PCI 1200) OX=176280 GN=rimP PE=3 SV=1	rimP	17.638	47.1	6	1	31	1.027	1.007	0.979	0.967	1.016	1.03	0.961	0.0346097
Q5HK15	Replicative DNA helicase OS=Staphylococcus epidermidis (strain ATCC 35984 / RP62A) OX=176279 GN=dnaB PE=3 SV=1	dnaB	52.496	39.1	14	14	26	0.992	0.993	0.998	1.016	1.007	1.004	1.001	0.883154
D4FJN2	Thiamine diphosphokinase OS=Staphylococcus epidermidis M23864:W2(grey) OX=525375 GN=HMPREF0794_0770 PE=4 SV=1	HMPREF0794_0770	24.004	50.2	6	6	14	1.009	0.957	1.009	1.012	0.985	1.033	0.984	0.509671
A0A0H2VKA5	Uncharacterized protein OS=Staphylococcus epidermidis (strain ATCC 12228 / FDA PCI 1200) OX=176280 GN=SE_p307 PE=4 SV=1	SE_p307	26.112	38.3	10	10	25	1.01	0.985	1.004	0.972	1.016	1.004	0.977	0.0820662
A0A0H2VE83	Uncharacterized protein OS=Staphylococcus epidermidis (strain ATCC 12228 / FDA PCI 1200) OX=176280 GN=SE_0095 PE=4 SV=1	SE_0095	40.957	18.4	8	8	23	0.895	1.102	1.1	1.153	0.848	0.85	1.294	0.000385211
A0A0E1VFY5	2-amino-4-hydroxy-6-hydroxymethyldihydropteridine pyrophosphokinase OS=Staphylococcus epidermidis W23144 OX=525376 GN=folK PE=4 SV=1	folK	81.292	16.5	10	6	23	0.979	1.018	0.979	1.042	0.985	1.009	1.022	0.34704
D4FKG7	Uncharacterized protein OS=Staphylococcus epidermidis M23864:W2(grey) OX=525375 GN=HMPREF0794_1055 PE=4 SV=1	HMPREF0794_1055	17.018	28	3	3	5	0.82	1.126	1.209	1.012	0.878	0.917	1.28	0.0159357
Q8CTJ9	UPF0178 protein SE_0451 OS=Staphylococcus epidermidis (strain ATCC 12228 / FDA PCI 1200) OX=176280 GN=SE_0451 PE=3 SV=1	SE_0451	16.918	5.4	1	1	1
Q5HRS6	Uncharacterized protein OS=Staphylococcus epidermidis (strain ATCC 35984 / RP62A) OX=176279 GN=SERP0117 PE=4 SV=1	SERP0117	101.53	13.3	11	1	47	0.934	1.066	1.064	1.074	0.941	0.92	1.146	4.61424e-05
A0A7T7D1Q1	Glyceraldehyde-3-phosphate dehydrogenase (Fragment) OS=Staphylococcus epidermidis OX=1282 GN=gap PE=4 SV=1	gap	17.353	77.8	14	1	155	0.906	1.092	1.062	1.023	0.961	0.955	1.126	0.0111907
Q5HP75	Polyprenyl synthetase OS=Staphylococcus epidermidis (strain ATCC 35984 / RP62A) OX=176279 GN=SERP1038 PE=3 SV=1	SERP1038	36.041	26.6	7	7	14	1.033	1.008	1.029	0.938	0.984	0.982	0.992	0.806154
D2JCX6	CDP-ribitol:poly(Ribitol phosphate) ribitol phosphotransferase OS=Staphylococcus epidermidis OX=1282 GN=SAP024A_024 PE=3 SV=1	SAP024A_024	46.317	2.1	1	1	1	0.968	0.916	1.046	1.017	1.041	1.036	0.978	0.648498
Q5HDX5	30S ribosomal protein S5 OS=Staphylococcus aureus (strain COL) OX=93062 GN=rpsE PE=3 SV=1	rpsE	17.742	51.8	11	1	37	0.904	1.082	1.055	1.106	0.963	0.9	1.172	0.00349583
Q8CPY3	Enolase OS=Staphylococcus epidermidis (strain ATCC 12228 / FDA PCI 1200) OX=176280 GN=eno PE=3 SV=1	eno	47.246	82.7	26	15	584	0.997	1.003	0.981	0.994	1.004	1.006	0.99	0.236666
A0A5E8Q8A6	HAD-IIB family hydrolase OS=Staphylococcus epidermidis OX=1282 GN=E1N04_00920 PE=4 SV=1	E1N04_00920	29.021	32.3	6	6	8	0.886	1.076	1.152	0.903	0.952	0.94	1.127	0.20418
Q8CNQ1	Low molecular weight protein-tyrosine-phosphatase PtpA OS=Staphylococcus epidermidis (strain ATCC 12228 / FDA PCI 1200) OX=176280 GN=ptpA PE=3 SV=1	ptpA	17.76	8.4	1	1	7	0.974	1.028	1.056	0.92	1.018	0.989	1.008	0.896839
Q5HCK8	tRNA uridine(34) hydroxylase OS=Staphylococcus aureus (strain COL) OX=93062 GN=trhO PE=3 SV=1	trhO	37.087	10.7	3	1	3
D4FLY1	Uncharacterized protein OS=Staphylococcus epidermidis M23864:W2(grey) OX=525375 GN=HMPREF0794_1569 PE=4 SV=1	HMPREF0794_1569	69.625	13.2	9	4	13	0.92	1.001	1.07	1.034	0.894	1.015	1.098	0.0935111
A0A7U0ABU7	3-keto-5-aminohexanoate cleavage protein OS=Staphylococcus epidermidis OX=1282 GN=I6I40_02350 PE=4 SV=1	I6I40_02350	32.377	26.3	5	5	5	0.993	0.997	1.016	1.1	0.944	0.961	1.074	0.102356
Q8CML6	tRNA pseudouridine synthase A OS=Staphylococcus epidermidis (strain ATCC 12228 / FDA PCI 1200) OX=176280 GN=truA PE=3 SV=1	truA	31.531	36	8	8	11	0.942	1.064	1.048	1.036	0.978	0.946	1.098	0.00267343
Q8CTM8	Putative antiporter subunit mnhG2 OS=Staphylococcus epidermidis (strain ATCC 12228 / FDA PCI 1200) OX=176280 GN=mnhG2 PE=3 SV=1	mnhG2	17.585	5.8	1	1	1
D4FIM9	Putative neutral zinc metallopeptidase OS=Staphylococcus epidermidis M23864:W2(grey) OX=525375 GN=HMPREF0794_0530 PE=4 SV=1	HMPREF0794_0530	23.471	42.2	7	7	32	1.009	0.967	0.995	1.041	0.969	0.989	1.012	0.656163
D4FMF1	Thioesterase family protein OS=Staphylococcus epidermidis M23864:W2(grey) OX=525375 GN=HMPREF0794_1739 PE=3 SV=1	HMPREF0794_1739	19.8	11.9	3	3	8	1.027	1.093	0.929	0.978	0.85	0.992	1.046	0.577486
A0A7I0ANS0	DUF4889 domain-containing protein OS=Staphylococcus epidermidis OX=1282 GN=E1N03_00015 PE=4 SV=1	E1N03_00015	13.027	48.3	8	8	46	1.037	0.921	0.93	0.939	1.074	1.08	0.874	0.000642715
A0A7I0A775	Class I SAM-dependent methyltransferase OS=Staphylococcus epidermidis OX=1282 GN=E1N12_05605 PE=4 SV=1	E1N12_05605	36.061	34.9	8	8	22	1.016	0.992	0.99	1.009	0.981	1.042	0.984	0.445181
D4FNL9	SsrA-binding protein OS=Staphylococcus epidermidis M23864:W2(grey) OX=525375 GN=smpB PE=3 SV=1	smpB	74.212	9.3	7	6	10	0.972	0.995	1.011	1.007	0.993	1.051	0.999	0.98514
A0A0H2VEG3	Triacylglycerol lipase OS=Staphylococcus epidermidis (strain ATCC 12228 / FDA PCI 1200) OX=176280 GN=SE_0185 PE=4 SV=1	SE_0185	72.213	26.1	13	11	22	1.025	0.967	0.954	0.903	1.06	1.078	0.893	0.011439
I0B6L4	Mobilization protein OS=Staphylococcus epidermidis OX=1282 GN=mob PE=4 SV=1	mob	31.599	49.4	12	9	29	1	1.021	0.98	1.016	0.997	1.001	1.006	0.660142
Q8CTE1	Probable cell division protein WhiA OS=Staphylococcus epidermidis (strain ATCC 12228 / FDA PCI 1200) OX=176280 GN=whiA PE=3 SV=1	whiA	35.821	34.7	11	11	21	1.037	1.007	0.98	0.971	0.995	1.031	0.966	0.108654
Q8CRG2	50S ribosomal protein L23 OS=Staphylococcus epidermidis (strain ATCC 12228 / FDA PCI 1200) OX=176280 GN=rplW PE=3 SV=1	rplW	10.599	67	8	8	43	0.97	1.054	1.027	1.066	0.952	0.936	1.101	0.00309662
Q5HRS9	DNA polymerase III subunit gamma/tau OS=Staphylococcus epidermidis (strain ATCC 35984 / RP62A) OX=176279 GN=dnaX PE=3 SV=1	dnaX	64.185	52.8	22	19	43	0.986	1.009	1.078	0.981	1.011	0.976	1.032	0.360643
Q8CRK4	Heme oxygenase (staphylobilin-producing) OS=Staphylococcus epidermidis (strain ATCC 12228 / FDA PCI 1200) OX=176280 GN=isdG PE=3 SV=1	isdG	12.023	24	3	3	11	0.966	1.031	1.036	0.988	0.988	1.023	1.026	0.313138
Q5HPB4	Peptide methionine sulfoxide reductase MsrB OS=Staphylococcus epidermidis (strain ATCC 35984 / RP62A) OX=176279 GN=msrB PE=3 SV=1	msrB	59.059	24.1	15	9	48	1.086	0.927	0.855	0.96	1.142	1.091	0.826	0.00714554
Q8CRU9	Methionine aminopeptidase OS=Staphylococcus epidermidis (strain ATCC 12228 / FDA PCI 1200) OX=176280 GN=map PE=3 SV=2	map	27.55	63.7	14	14	58	1.01	1.013	1.003	1.005	0.992	0.999	1.007	0.332452
Q8CU95	Serine--tRNA ligase OS=Staphylococcus epidermidis (strain ATCC 12228 / FDA PCI 1200) OX=176280 GN=serS PE=3 SV=1	serS	48.896	64	24	17	153	1.12	0.897	0.888	0.891	1.108	1.106	0.803	1.49953e-06
A0A7Z1QUF4	Uncharacterized protein OS=Staphylococcus epidermidis OX=1282 GN=CP553_07345 PE=4 SV=1	CP553_07345	33.04	42.7	10	6	15	0.991	0.99	0.947	1.114	0.923	0.962	1.061	0.339101
D4FNN9	Uncharacterized protein OS=Staphylococcus epidermidis M23864:W2(grey) OX=525375 GN=HMPREF0794_2177 PE=4 SV=1	HMPREF0794_2177	9.0894	31.2	2	2	2
A0A0E1VDX3	50S ribosomal protein L35 OS=Staphylococcus epidermidis W23144 OX=525376 GN=rpmI PE=3 SV=1	rpmI	52.564	32.7	13	2	28	0.98	1.002	0.981	0.93	1.051	1.08	0.936	0.147253
Q8CRM3	Type II pantothenate kinase OS=Staphylococcus epidermidis (strain ATCC 12228 / FDA PCI 1200) OX=176280 GN=coaW PE=3 SV=1	coaW	29.233	33.6	7	7	11	1.071	0.958	0.971	0.995	1.026	1.019	0.938	0.0293812
D4FMA5	YolD-like protein OS=Staphylococcus epidermidis M23864:W2(grey) OX=525375 GN=HMPREF0794_1693 PE=4 SV=1	HMPREF0794_1693	78.825	4.5	2	2	2	0.895	1.039	1.101	1.021	0.957	0.987	1.113	0.0428876
Q5HMF2	S1 RNA binding domain protein OS=Staphylococcus epidermidis (strain ATCC 35984 / RP62A) OX=176279 GN=SERP1676 PE=4 SV=1	SERP1676	80.815	44.6	29	1	47
D4FJD4	Response regulator receiver domain protein OS=Staphylococcus epidermidis M23864:W2(grey) OX=525375 GN=HMPREF0794_0672 PE=4 SV=1	HMPREF0794_0672	22.931	25.5	5	4	4	1.064	0.967	0.898	1.004	1.037	1.068	0.905	0.0420223
Q8CS74	Threonine--tRNA ligase OS=Staphylococcus epidermidis (strain ATCC 12228 / FDA PCI 1200) OX=176280 GN=thrS PE=3 SV=1	thrS	74.775	68.2	40	40	132	0.977	1.017	1.016	1.026	0.974	0.977	1.045	0.000182106
Q5HGK3	Malonyl CoA-acyl carrier protein transacylase OS=Staphylococcus aureus (strain COL) OX=93062 GN=fabD PE=3 SV=1	fabD	33.635	3.6	1	1	2	1.06	0.966	0.962	1.085	0.938	1.009	1.002	0.976336
A0A5R1C4K0	Bifunctional purine biosynthesis protein PurH OS=Staphylococcus epidermidis OX=1282 GN=purH PE=3 SV=1	purH	131.82	27	28	21	71	1.083	0.956	0.917	0.921	1.087	1.103	0.854	0.000383204
Q5HL47	Uncharacterized protein OS=Staphylococcus epidermidis (strain ATCC 35984 / RP62A) OX=176279 GN=SERP2140 PE=4 SV=1	SERP2140	99.164	41.3	34	4	62	1.038	0.975	0.894	0.969	0.999	1.038	0.923	0.0581246
O54222	EciB protein OS=Staphylococcus epidermidis OX=1282 GN=eciB PE=4 SV=1	eciB	117.09	0.9	1	1	1	0.767	1.166	1.306	0.968	0.87	0.887	1.363	0.0366273
Q937Z2	Putative septation protein SpoVG OS=Staphylococcus epidermidis OX=1282 GN=spoVG PE=3 SV=1	spoVG	11.293	67	7	1	44	0.419	1.628	1.719	1.004	0.555	0.531	2.891	0.00558819
A0A0H2VGM6	Abortive phage resistance protein OS=Staphylococcus epidermidis (strain ATCC 12228 / FDA PCI 1200) OX=176280 GN=SE_0042 PE=4 SV=1	SE_0042	30.687	49.6	13	13	23	0.966	1.058	1.059	0.983	0.992	0.991	1.051	0.131882
Q8CMQ2	Alkyl hydroperoxide reductase C OS=Staphylococcus epidermidis (strain ATCC 12228 / FDA PCI 1200) OX=176280 GN=ahpC PE=3 SV=1	ahpC	21.085	95.2	16	15	138	0.942	1.014	1.039	1.024	0.934	0.944	1.091	0.000362551
Q5HPL0	Uncharacterized protein OS=Staphylococcus epidermidis (strain ATCC 35984 / RP62A) OX=176279 GN=SERP0901 PE=4 SV=1	SERP0901	12.205	49	6	6	16	1.068	0.95	0.973	1	1.014	1.044	0.935	0.0334575
A0A0H2VGK5	Uncharacterized protein OS=Staphylococcus epidermidis (strain ATCC 12228 / FDA PCI 1200) OX=176280 GN=SE_0423 PE=4 SV=1	SE_0423	36.01	8.6	3	3	5	1.055	0.984	0.922	0.94	1.056	1.078	0.892	0.00513615
A0A4Q9W9W5	ABC transporter ATP-binding protein OS=Staphylococcus epidermidis OX=1282 GN=CP553_10620 PE=4 SV=1	CP553_10620	60.431	62.2	27	1	97	1.024	0.975	1.044	1	0.982	0.995	1.006	0.819082
A0A7T9WR38	Cysteine desulfurase OS=Staphylococcus epidermidis OX=1282 GN=I6I40_07115 PE=4 SV=1	I6I40_07115	42.172	11.1	4	1	4
D7RLZ2	Translation elongation factor Tu (Fragment) OS=Staphylococcus epidermidis OX=1282 PE=3 SV=1	--	24.094	88.5	19	1	305	0.842	1.066	1.209	1.062	0.899	0.904	1.262	0.00876441
Q8CMY4	Probable malate:quinone oxidoreductase 4 OS=Staphylococcus epidermidis (strain ATCC 12228 / FDA PCI 1200) OX=176280 GN=mqo4 PE=3 SV=1	mqo4	56.353	60.3	29	16	191	1.041	0.977	0.975	1.008	1.039	0.994	0.963	0.111895
Q8CS69	Pyruvate kinase OS=Staphylococcus epidermidis (strain ATCC 12228 / FDA PCI 1200) OX=176280 GN=pyk PE=3 SV=1	pyk	63.032	78.1	40	2	463	0.981	0.97	0.972	1.015	1.055	1.006	0.972	0.339684
D4FMS3	Cof-like hydrolase OS=Staphylococcus epidermidis M23864:W2(grey) OX=525375 GN=HMPREF0794_1861 PE=4 SV=1	HMPREF0794_1861	109.21	24.7	21	4	63	0.871	1.109	1.018	1.255	0.877	0.86	1.297	0.0137102
Q5HP98	THUMP domain-containing protein OS=Staphylococcus epidermidis (strain ATCC 35984 / RP62A) OX=176279 GN=SERP1015 PE=4 SV=1	SERP1015	42.841	59.8	16	11	35	0.957	1.012	1.015	0.999	1.006	0.993	1.024	0.207897
Q5HMI5	Uncharacterized protein OS=Staphylococcus epidermidis (strain ATCC 35984 / RP62A) OX=176279 GN=SERP1643 PE=4 SV=1	SERP1643	170.34	16.1	17	1	71
Q5HL40	Epoxyqueuosine reductase QueH OS=Staphylococcus epidermidis (strain ATCC 35984 / RP62A) OX=176279 GN=queH PE=3 SV=1	queH	27.604	25.2	6	6	7	1.132	0.862	0.827	0.962	1.122	1.089	0.793	0.00739827
Q5HLG5	2-dehydropantoate 2-reductase OS=Staphylococcus epidermidis (strain ATCC 35984 / RP62A) OX=176279 GN=SERP2022 PE=3 SV=1	SERP2022	34.508	27.1	5	5	9	1.114	0.934	0.872	0.978	1.07	1.109	0.845	0.00909327
A0A060AKE0	Endodeoxyribonuclease OS=Staphylococcus phage 6ec OX=1500386 GN=PHAGE6E_21 PE=4 SV=1	PHAGE6E_21	25.65	6.7	2	2	2
D4FK87	Oligoendopeptidase F OS=Staphylococcus epidermidis M23864:W2(grey) OX=525375 GN=pepF PE=3 SV=1	pepF	69.741	62.6	33	33	178	1.047	0.962	0.974	0.96	1.034	1.046	0.926	0.000221692
D4FL28	Uncharacterized protein OS=Staphylococcus epidermidis M23864:W2(grey) OX=525375 GN=HMPREF0794_1266 PE=4 SV=1	HMPREF0794_1266	7.069	39	2	2	6	1.252	0.841	0.953	0.891	1.054	1.103	0.788	0.0195573
Q8CPG8	Elongation factor Ts OS=Staphylococcus epidermidis (strain ATCC 12228 / FDA PCI 1200) OX=176280 GN=tsf PE=3 SV=1	tsf	32.511	74.7	25	25	231	0.949	1.036	1.058	1.01	0.958	0.966	1.08	0.0058031
Q5HPB7	Probable CtpA-like serine protease OS=Staphylococcus epidermidis (strain ATCC 35984 / RP62A) OX=176279 GN=SERP0996 PE=3 SV=1	SERP0996	55.107	38.9	17	1	32	0.974	1.028	1.069	0.948	0.98	1.014	1.026	0.549003
Q8CNJ5	ATP synthase subunit alpha OS=Staphylococcus epidermidis (strain ATCC 12228 / FDA PCI 1200) OX=176280 GN=atpA PE=3 SV=1	atpA	54.742	48.9	25	25	112	0.998	1.015	1.01	1.019	0.98	0.978	1.03	0.0132664
Q5HNX5	Uncharacterized protein OS=Staphylococcus epidermidis (strain ATCC 35984 / RP62A) OX=176279 GN=SERP1139 PE=4 SV=1	SERP1139	75.242	32.2	21	10	41	1.174	0.876	0.83	0.877	1.173	1.163	0.736	7.59475e-05
A0A0H2VGX9	Uncharacterized protein OS=Staphylococcus epidermidis (strain ATCC 12228 / FDA PCI 1200) OX=176280 GN=SE_1352 PE=4 SV=1	SE_1352	23.147	71.9	16	2	83	0.992	0.989	1.02	1.008	1.02	0.991	1.005	0.738945
Q8CRM8	50S ribosomal protein L31 type B OS=Staphylococcus epidermidis (strain ATCC 12228 / FDA PCI 1200) OX=176280 GN=rpmE2 PE=3 SV=1	rpmE2	9.7787	69.4	5	5	62	0.857	1.118	1.103	1.077	0.858	0.879	1.271	6.219e-05
Q8CP83	2-oxoglutarate dehydrogenase E1 component OS=Staphylococcus epidermidis (strain ATCC 12228 / FDA PCI 1200) OX=176280 GN=odhA PE=3 SV=1	odhA	105.69	50	38	38	90	1.047	0.959	0.954	0.997	1.034	1.047	0.93	0.00755148
Q5HR82	Uncharacterized protein OS=Staphylococcus epidermidis (strain ATCC 35984 / RP62A) OX=176279 GN=SERP0311 PE=4 SV=1	SERP0311	35.709	12.1	3	3	3
Q8CR03	Sulfate adenylyltransferase OS=Staphylococcus epidermidis (strain ATCC 12228 / FDA PCI 1200) OX=176280 GN=sat PE=3 SV=1	sat	44.354	18.9	7	7	10	0.582	1.408	1.343	1.386	0.563	0.627	2.335	1.66465e-05
A0A0H2WVN3	Uncharacterized protein OS=Staphylococcus aureus (strain COL) OX=93062 GN=SACOL1017 PE=3 SV=1	SACOL1017	40.154	3.3	1	1	1	1.006	0.958	0.948	1.008	1.079	1.036	0.934	0.0690466
D4FNB6	CobW/P47K family protein OS=Staphylococcus epidermidis M23864:W2(grey) OX=525375 GN=HMPREF0794_2054 PE=3 SV=1	HMPREF0794_2054	126.66	8.9	10	8	16	1.031	0.984	1.038	1.043	0.98	0.946	1.037	0.310682
A0A7T9WUQ7	ATP-binding protein OS=Staphylococcus epidermidis OX=1282 GN=I6I40_11550 PE=4 SV=1	I6I40_11550	37.538	12.2	5	3	6	0.99	1.036	1.065	1.016	0.967	0.933	1.079	0.0262403
Q93SQ9	Recombinase family protein OS=Staphylococcus epidermidis OX=1282 GN=binR PE=3 SV=1	binR	22	24	4	1	11	0.755	1.132	0.732	0.981	1.089	1.325	0.898	0.664616
D4FJK3	ATP-dependent protease subunit HslV OS=Staphylococcus epidermidis M23864:W2(grey) OX=525375 GN=hslV PE=3 SV=1	hslV	133.59	28.7	25	1	73	1.192	0.963	0.991	1.144	0.844	0.884	1.061	0.601156
Q5HHP5	Glyceraldehyde-3-phosphate dehydrogenase 1 OS=Staphylococcus aureus (strain COL) OX=93062 GN=gapA1 PE=3 SV=1	gapA1	36.28	36.3	12	3	184
Q8CPH6	Ribonuclease HII OS=Staphylococcus epidermidis (strain ATCC 12228 / FDA PCI 1200) OX=176280 GN=rnhB PE=3 SV=1	rnhB	28.986	27	6	6	7	0.887	1.231	1.255	0.864	0.82	0.916	1.277	0.139222
D4FLG4	Glycine betaine/L-proline transport ATP binding subunit OS=Staphylococcus epidermidis M23864:W2(grey) OX=525375 GN=proV PE=3 SV=1	proV	44.668	28.6	10	4	21
D4FJ26	DEAD-box ATP-dependent RNA helicase CshB OS=Staphylococcus epidermidis M23864:W2(grey) OX=525375 GN=cshB PE=3 SV=1	cshB	164.61	27.6	34	16	60	0.956	1.015	1.033	1.012	0.992	0.997	1.039	0.0592192
Q5HN81	Putative tRNA (cytidine(34)-2'-O)-methyltransferase OS=Staphylococcus epidermidis (strain ATCC 35984 / RP62A) OX=176279 GN=SERP1391 PE=3 SV=1	SERP1391	18.04	43.6	5	2	9	1.06	0.994	0.964	0.946	1.04	1.031	0.927	0.0104483
Q8CRH6	50S ribosomal protein L18 OS=Staphylococcus epidermidis (strain ATCC 12228 / FDA PCI 1200) OX=176280 GN=rplR PE=3 SV=1	rplR	13.295	55.8	8	1	53	0.908	1.058	1.077	1.14	0.907	0.901	1.206	0.00118046
Q8CQK7	Chromosomal replication initiator protein DnaA OS=Staphylococcus epidermidis (strain ATCC 12228 / FDA PCI 1200) OX=176280 GN=dnaA PE=3 SV=1	dnaA	52.096	48.3	23	23	56	0.961	1.007	1.054	1.016	0.995	0.988	1.045	0.0657017
A0A7I0APE8	Uncharacterized protein OS=Staphylococcus epidermidis OX=1282 GN=E1N00_12365 PE=4 SV=1	E1N00_12365	32.094	55.3	14	14	61	1.014	0.994	0.962	0.991	1.013	1.012	0.97	0.0419523
D4FMV0	ThrE domain-containing protein OS=Staphylococcus epidermidis M23864:W2(grey) OX=525375 GN=HMPREF0794_1888 PE=4 SV=1	HMPREF0794_1888	115.81	12.1	13	2	21	1.248	0.81	0.728	1.034	1.12	1.138	0.734	0.0429312
D4FHI6	HD domain protein OS=Staphylococcus epidermidis M23864:W2(grey) OX=525375 GN=HMPREF0794_0024 PE=4 SV=1	HMPREF0794_0024	24.873	19.7	5	1	8	0.944	1.044	1.051	1.099	0.934	0.928	1.138	0.00155831
A0A7I0ALS3	Ferritin OS=Staphylococcus epidermidis OX=1282 GN=ftnA PE=3 SV=1	ftnA	19.483	46.7	9	9	69	1.16	0.893	0.893	0.799	1.156	1.211	0.733	0.00145685
Q5HNH1	Uncharacterized protein OS=Staphylococcus epidermidis (strain ATCC 35984 / RP62A) OX=176279 GN=SERP1298 PE=4 SV=1	SERP1298	45.559	34.2	14	14	49	0.954	1.05	1.047	1.032	0.94	0.95	1.1	0.000160428
D4FIY9	Shikimate dehydrogenase (NADP(+)) OS=Staphylococcus epidermidis M23864:W2(grey) OX=525375 GN=aroE PE=4 SV=1	aroE	28.096	38.1	8	2	15	0.877	1.059	1.197	0.832	1.042	1	1.058	0.708193
Q5HLT0	Amino acid permease OS=Staphylococcus epidermidis (strain ATCC 35984 / RP62A) OX=176279 GN=SERP1902 PE=4 SV=1	SERP1902	112.73	6.6	6	2	13	0.901	1.004	1.113	1.104	0.975	0.904	1.159	0.0248761
A0A0N0LVR3	Fe-S cluster assembly ATPase SufC OS=Staphylococcus epidermidis OX=1282 GN=sufC PE=3 SV=1	sufC	28.218	75.5	20	2	96	0.962	1.005	1.157	1.071	0.941	1.005	1.112	0.0809845
Q8CPP6	Probable quinol oxidase subunit 2 OS=Staphylococcus epidermidis (strain ATCC 12228 / FDA PCI 1200) OX=176280 GN=qoxA PE=3 SV=1	qoxA	42.872	59.1	22	22	88	1.107	0.915	0.878	0.963	1.097	1.054	0.846	0.00543548
A0A0H2WY34	Uncharacterized protein OS=Staphylococcus aureus (strain COL) OX=93062 GN=SACOL0465 PE=4 SV=1	SACOL0465	82.055	28.5	20	1	39	0.892	0.942	1.06	1.132	1.049	0.939	1.088	0.308075
A0A7I0AZZ0	ABC transporter substrate-binding protein OS=Staphylococcus epidermidis OX=1282 GN=E1N12_10765 PE=4 SV=1	E1N12_10765	33.371	43.1	15	3	29	1.004	0.994	1.002	0.992	1.023	1.007	0.985	0.0811003
A0A0H2VIM1	Uncharacterized protein OS=Staphylococcus epidermidis (strain ATCC 12228 / FDA PCI 1200) OX=176280 GN=SE_1131 PE=4 SV=1	SE_1131	133.96	41.7	39	10	60	0.985	1.066	0.994	0.988	0.936	0.98	1.051	0.16901
D4FI88	Thioredoxin OS=Staphylococcus epidermidis M23864:W2(grey) OX=525375 GN=HMPREF0794_0276 PE=4 SV=1	HMPREF0794_0276	12.007	54.4	7	7	22	1.062	0.966	0.971	0.968	1.044	1.047	0.921	0.000117963
Q8CP38	Exodeoxyribonuclease 7 large subunit OS=Staphylococcus epidermidis (strain ATCC 12228 / FDA PCI 1200) OX=176280 GN=xseA PE=3 SV=1	xseA	51.182	49.7	22	22	38	1.012	0.957	0.964	1.044	1.033	1.005	0.972	0.375148
D2JCS2	Putative replication initiator protein OS=Staphylococcus epidermidis OX=1282 GN=SAP110B_007 PE=3 SV=1	SAP110B_007	45.265	4.7	2	2	5	0.975	1.061	1.035	1.04	0.899	0.878	1.14	0.0157014
A0A0H2VIJ6	Uncharacterized protein OS=Staphylococcus epidermidis (strain ATCC 12228 / FDA PCI 1200) OX=176280 GN=SE_1091 PE=4 SV=1	SE_1091	202.55	27.4	41	3	72	0.858	0.956	1.085	1.089	0.966	0.986	1.114	0.151275
D4FNK5	TIGR01777 family protein OS=Staphylococcus epidermidis M23864:W2(grey) OX=525375 GN=HMPREF0794_2143 PE=3 SV=1	HMPREF0794_2143	155.47	13	14	1	31
Q8CR79	Sensor protein LytS OS=Staphylococcus epidermidis (strain ATCC 12228 / FDA PCI 1200) OX=176280 GN=lytS PE=3 SV=1	lytS	65.451	8.3	4	4	5	0.985	0.959	1.02	1.013	0.987	0.987	1.011	0.612346
D5LT74	NAD-dependent glyceraldehyde-3-phosphate dehydrogenase (Fragment) OS=Staphylococcus epidermidis OX=1282 GN=gap PE=3 SV=1	gap	29.015	94.1	24	1	420	0.919	1.106	1.173	0.92	0.903	0.971	1.145	0.161562
A0A7G9EGG9	ECM-binding protein homolog OS=Staphylococcus epidermidis OX=1282 GN=ATM22_06530 PE=4 SV=1	ATM22_06530	1130.9	0.7	5	1	5	1.17	1.03	0.917	0.927	0.952	1.04	0.909	0.255036
Q8CNY8	Porphobilinogen deaminase OS=Staphylococcus epidermidis (strain ATCC 12228 / FDA PCI 1200) OX=176280 GN=hemC PE=3 SV=1	hemC	34.226	62.7	19	19	56	1.015	1.011	1.012	1.018	0.995	0.996	1.012	0.163895
Q8CMT8	Dihydroneopterin aldolase OS=Staphylococcus epidermidis (strain ATCC 12228 / FDA PCI 1200) OX=176280 GN=folB PE=3 SV=1	folB	13.693	66.1	9	1	33	0.979	1.014	1.036	0.982	1.042	0.968	1.014	0.626542
Q8CPH7	Ribosome maturation factor RimM OS=Staphylococcus epidermidis (strain ATCC 12228 / FDA PCI 1200) OX=176280 GN=rimM PE=3 SV=1	rimM	19.337	49.1	7	7	19	0.949	1.057	1.065	1.033	0.938	0.994	1.095	0.0102852
Q8CR20	3-methyl-2-oxobutanoate hydroxymethyltransferase OS=Staphylococcus epidermidis (strain ATCC 12228 / FDA PCI 1200) OX=176280 GN=panB PE=3 SV=1	panB	29.626	53.7	11	11	37	1.011	0.977	0.974	1.012	1.001	1.006	0.982	0.215478
D4FJP7	3-demethylubiquinone-9 3-methyltransferase domain protein OS=Staphylococcus epidermidis M23864:W2(grey) OX=525375 GN=HMPREF0794_0785 PE=4 SV=1	HMPREF0794_0785	15.21	27.4	4	3	10	1.019	1.023	1.044	0.995	0.981	0.959	1.035	0.202145
Q8CMZ4	Aspartate 1-decarboxylase OS=Staphylococcus epidermidis (strain ATCC 12228 / FDA PCI 1200) OX=176280 GN=panD PE=3 SV=2	panD	14.151	63.3	7	2	28	1.02	0.981	1.034	1.01	1.008	0.968	1.01	0.683099
Q8CTQ7	Putative pyridoxine kinase OS=Staphylococcus epidermidis (strain ATCC 12228 / FDA PCI 1200) OX=176280 GN=pdxK PE=3 SV=1	pdxK	29.845	69.2	17	17	79	1.029	0.996	0.964	0.99	1.029	1.008	0.962	0.0336582
A0A0H2VI45	Uncharacterized protein OS=Staphylococcus epidermidis (strain ATCC 12228 / FDA PCI 1200) OX=176280 GN=SE_2138 PE=4 SV=1	SE_2138	11.904	50.9	4	1	11
Q8CP02	Probable cell wall amidase LytH OS=Staphylococcus epidermidis (strain ATCC 12228 / FDA PCI 1200) OX=176280 GN=lytH PE=3 SV=1	lytH	32.543	27.1	6	6	8	0.929	1.076	1.055	1.004	0.982	0.934	1.102	0.023325
Q8CP21	GTPase Era OS=Staphylococcus epidermidis (strain ATCC 12228 / FDA PCI 1200) OX=176280 GN=era PE=3 SV=1	era	34.433	46.5	13	8	24	0.982	1.07	1.061	0.985	0.933	1.019	1.062	0.17632
A0A7I0AM37	ATP synthase gamma chain OS=Staphylococcus epidermidis OX=1282 GN=atpG PE=3 SV=1	atpG	69.044	27.1	13	2	39	0.943	0.977	0.997	1.114	0.957	1.02	1.058	0.311379
Q5HRV5	DUF2294 domain-containing protein OS=Staphylococcus epidermidis (strain ATCC 35984 / RP62A) OX=176279 GN=SERP0087 PE=4 SV=1	SERP0087	13.904	51.6	6	6	9	1.046	0.991	0.99	0.995	1.001	0.894	1.012	0.779833
Q5HRF7	Phosphate acetyltransferase OS=Staphylococcus epidermidis (strain ATCC 35984 / RP62A) OX=176279 GN=pta PE=3 SV=1	pta	35.1	55.9	12	1	53	0.966	0.995	1.03	0.938	1.054	1.04	0.968	0.449473
A0A2S1XWC1	Putative membrane protein OS=Staphylococcus epidermidis OX=1282 GN=pLF25_1 PE=4 SV=1	pLF25_1	7.2707	20.6	1	1	4	0.716	1.155	1.124	0.973	0.626	0.551	1.718	0.00417092
A0A0H2WVS0	Conserved domain protein OS=Staphylococcus aureus (strain COL) OX=93062 GN=SACOL1035 PE=4 SV=1	SACOL1035	42.202	2	1	1	1
Q8CSD5	Glycine--tRNA ligase OS=Staphylococcus epidermidis (strain ATCC 12228 / FDA PCI 1200) OX=176280 GN=glyQS PE=3 SV=1	glyQS	53.666	69.1	26	26	167	1.018	0.988	0.982	1.011	1.008	1.007	0.983	0.142184
Q8CP75	Holliday junction resolvase RecU OS=Staphylococcus epidermidis (strain ATCC 12228 / FDA PCI 1200) OX=176280 GN=recU PE=3 SV=1	recU	24.507	33.2	7	7	8	0.98	0.968	1.034	1.056	0.986	0.997	1.032	0.311339
A0A0E1VDL9	Nucleoside triphosphatase YtkD OS=Staphylococcus epidermidis W23144 OX=525376 GN=ytkD PE=4 SV=1	ytkD	54.379	29.2	12	2	23
A0A0E1V9S9	HTH-type transcriptional regulator SarZ OS=Staphylococcus epidermidis W23144 OX=525376 GN=sarZ PE=4 SV=1	sarZ	49.62	9.3	4	3	5	1.03	0.85	1.035	1.022	0.947	1.063	0.956	0.547352
Q8CSL7	Signal transduction histidine-protein kinase ArlS OS=Staphylococcus epidermidis (strain ATCC 12228 / FDA PCI 1200) OX=176280 GN=arlS PE=3 SV=1	arlS	52.859	18	7	7	7	0.95	1.03	1.043	1.042	0.954	0.985	1.078	0.00338747
Q8CT68	Global transcriptional regulator Spx OS=Staphylococcus epidermidis (strain ATCC 12228 / FDA PCI 1200) OX=176280 GN=spx PE=3 SV=1	spx	15.423	55.7	7	7	28	1.035	0.982	0.991	1.03	0.969	0.985	1.005	0.853379
D2JCM2	Uncharacterized protein OS=Staphylococcus epidermidis OX=1282 GN=SAP025A_027 PE=4 SV=1	SAP025A_027	48.973	16.8	9	9	18	0.944	1.096	1.043	1.006	0.972	0.968	1.09	0.0312675
D2JCX0	Uncharacterized protein OS=Staphylococcus epidermidis OX=1282 GN=SAP024A_018 PE=4 SV=1	SAP024A_018	35.145	3.3	1	1	1
Q5HIC8	Elongation factor G OS=Staphylococcus aureus (strain COL) OX=93062 GN=fusA PE=3 SV=3	fusA	173.34	17.4	21	1	206	0.971	0.998	1.048	0.978	1.029	0.996	1.009	0.747084
Q5HQF2	Enoyl-[acyl-carrier-protein] reductase [NADPH] OS=Staphylococcus epidermidis (strain ATCC 35984 / RP62A) OX=176279 GN=fabI PE=3 SV=1	fabI	27.987	74.6	13	9	52	0.992	1.006	0.984	1.03	0.996	1.008	1.008	0.606868
Q5HPR5	DNA translocase FtsK OS=Staphylococcus epidermidis (strain ATCC 35984 / RP62A) OX=176279 GN=ftsK PE=3 SV=1	ftsK	157.78	27.9	34	24	128	0.946	1.056	1.05	1.013	0.952	0.948	1.096	0.00224429
A0A125SJK4	ArsR family transcriptional regulator OS=Staphylococcus epidermidis OX=1282 GN=CP553_00925 PE=4 SV=1	CP553_00925	12.824	75	6	6	16	0.974	1.025	1.062	1.029	0.975	0.967	1.069	0.00454547
Q5HMD9	UDP-N-acetylmuramoyl-tripeptide--D-alanyl-D-alanine ligase OS=Staphylococcus epidermidis (strain ATCC 35984 / RP62A) OX=176279 GN=murF PE=3 SV=1	murF	50.141	68.5	28	4	95	1.006	0.887	0.889	0.991	0.988	1.024	0.917	0.0814244
D4FK25	Beta-lactamase OS=Staphylococcus epidermidis M23864:W2(grey) OX=525375 GN=HMPREF0794_0913 PE=4 SV=1	HMPREF0794_0913	93.983	29	21	10	43	0.997	0.99	1.066	0.94	0.976	1.01	1.004	0.938415
A0A0H2VHG9	Inosine-adenosine-guanosine-nucleoside hydrolase OS=Staphylococcus epidermidis (strain ATCC 12228 / FDA PCI 1200) OX=176280 GN=SE_1857 PE=4 SV=1	SE_1857	35.278	46	10	10	34	1.019	1.003	1.034	0.991	1.016	1.041	0.984	0.344463
D4FND5	Response regulator SaeR OS=Staphylococcus epidermidis M23864:W2(grey) OX=525375 GN=saeR PE=4 SV=1	saeR	26.156	15.7	4	1	10	1.019	0.964	1.038	0.935	0.967	1.096	0.953	0.373199
Q5HNT1	ATP-dependent RecD-like DNA helicase OS=Staphylococcus epidermidis (strain ATCC 35984 / RP62A) OX=176279 GN=recD2 PE=3 SV=1	recD2	91.865	35.7	22	22	28	0.994	1.012	1.021	1.038	0.992	0.989	1.032	0.0138641
A0A0H2VGR8	ABC transporter ecsA-like protein OS=Staphylococcus epidermidis (strain ATCC 12228 / FDA PCI 1200) OX=176280 GN=SE_0094 PE=4 SV=1	SE_0094	27	75.2	17	17	71	0.802	1.126	1.176	1.155	0.836	0.829	1.401	4.6374e-05
Q5HRK3	Amidohydrolase family protein OS=Staphylococcus epidermidis (strain ATCC 35984 / RP62A) OX=176279 GN=SERP0190 PE=4 SV=1	SERP0190	43.58	26	7	1	11
A0A7H5C475	ABC transporter ATP-binding protein OS=Staphylococcus epidermidis OX=1282 GN=F9B71_12260 PE=4 SV=1	F9B71_12260	26.882	3.9	1	1	1	0.969	1.077	0.981	0.878	1.048	1.07	0.951	0.471117
A0A7I0AA79	Phosphoesterase OS=Staphylococcus epidermidis OX=1282 GN=E1N12_00765 PE=3 SV=1	E1N12_00765	19.858	68	9	5	15	1.072	0.994	1.028	0.965	1.019	0.968	0.976	0.538557
A0A7H5C3Y9	RepB family plasmid replication initiator protein OS=Staphylococcus epidermidis OX=1282 GN=F9B71_12545 PE=4 SV=1	F9B71_12545	35.315	16.2	7	7	12	0.967	1.018	1.044	0.998	0.942	0.986	1.057	0.0405487
A0A7I0AKV9	50S ribosomal protein L18 OS=Staphylococcus epidermidis OX=1282 GN=rplR PE=3 SV=1	rplR	13.294	55.8	8	1	54	0.9	1.11	1.111	1.05	0.878	0.938	1.204	0.00227906
Q5HLA7	Aldehyde dehydrogenase family protein OS=Staphylococcus epidermidis (strain ATCC 35984 / RP62A) OX=176279 GN=SERP2080 PE=3 SV=1	SERP2080	52.97	48.4	14	2	20	0.685	1.287	1.291	1.222	0.696	0.743	1.789	4.49522e-05
A0A7I0BZA6	Rrf2 family transcriptional regulator OS=Staphylococcus epidermidis OX=1282 GN=E1M98_08015 PE=4 SV=1	E1M98_08015	15.794	65.7	9	2	22	1.197	0.97	0.857	1.042	1.012	0.991	0.897	0.25849
A0A6M9X611	Isopeptide-forming domain-containing fimbrial protein OS=Staphylococcus epidermidis OX=1282 GN=F9B20_05735 PE=4 SV=1	F9B20_05735	116.7	3	2	2	2
Q8CPL6	Endonuclease MutS2 OS=Staphylococcus epidermidis (strain ATCC 12228 / FDA PCI 1200) OX=176280 GN=mutS2 PE=3 SV=1	mutS2	88.718	26.1	20	13	29	1.042	0.97	0.934	1.011	1.05	1.028	0.934	0.0446424
Q8CQU7	Ribose-phosphate pyrophosphokinase OS=Staphylococcus epidermidis (strain ATCC 12228 / FDA PCI 1200) OX=176280 GN=prs PE=3 SV=1	prs	35.337	50.8	16	16	74	1.013	1.01	0.992	0.994	1.013	1.009	0.987	0.0905933
A0A7H5C9R0	Phosphoenolpyruvate-protein phosphotransferase OS=Staphylococcus epidermidis OX=1282 GN=ptsP PE=3 SV=1	ptsP	63.396	64.3	33	2	219	1.006	1.007	0.968	0.999	1.024	1.016	0.976	0.140505
A0A7I0B051	N5-carboxyaminoimidazole ribonucleotide synthase OS=Staphylococcus epidermidis OX=1282 GN=purK PE=3 SV=1	purK	98.444	12	8	1	11	1.072	0.904	0.881	1.047	1.101	1.042	0.881	0.0820104
Q8CRU0	DNA ligase OS=Staphylococcus epidermidis (strain ATCC 12228 / FDA PCI 1200) OX=176280 GN=ligA PE=3 SV=1	ligA	75.108	46.6	33	1	56
Q8CQ10	Lipoteichoic acid synthase OS=Staphylococcus epidermidis (strain ATCC 12228 / FDA PCI 1200) OX=176280 GN=ltaS PE=3 SV=1	ltaS	74.436	34.8	19	19	106	1.091	0.923	0.916	0.929	1.087	1.054	0.856	0.000186541
A0A0H2VIE7	Zn-binding lipoprotein adcA OS=Staphylococcus epidermidis (strain ATCC 12228 / FDA PCI 1200) OX=176280 GN=SE_2068 PE=3 SV=1	SE_2068	35.635	20.1	6	1	6	1.071	0.965	0.994	0.946	1.021	1.037	0.928	0.0209936
Q5HMW1	Uncharacterized protein OS=Staphylococcus epidermidis (strain ATCC 35984 / RP62A) OX=176279 GN=SERP1517 PE=4 SV=1	SERP1517	141.93	12	16	1	35	1.001	0.956	0.913	1.043	1.058	1.03	0.943	0.226165
A0A0E1VH12	DNA-directed RNA polymerase subunit beta OS=Staphylococcus epidermidis W23144 OX=525376 GN=rpoB PE=3 SV=1	rpoB	133.04	65.3	65	46	289	0.969	1.012	1.026	1.018	0.974	0.99	1.042	0.00562918
A0A0U2CIZ3	DUF536 domain-containing protein OS=Staphylococcus epidermidis OX=1282 GN=E1N04_10275 PE=4 SV=1	E1N04_10275	29.715	20.4	5	1	6	0.933	1.068	1.011	1.005	0.96	1.03	1.055	0.198961
A0A7I0BP97	Amino acid ABC transporter permease OS=Staphylococcus epidermidis OX=1282 GN=E1N03_00150 PE=3 SV=1	E1N03_00150	26.572	7.1	1	1	1	0.91	1.073	1.009	0.961	0.918	1.13	1.029	0.697541
Q5HMY0	Sucrose-6-phosphate hydrolase OS=Staphylococcus epidermidis (strain ATCC 35984 / RP62A) OX=176279 GN=cscA PE=3 SV=1	cscA	101.18	35.7	34	34	76	1.034	1.004	1.024	0.954	0.998	1.014	0.979	0.40975
Q5HPD8	Acylphosphatase OS=Staphylococcus epidermidis (strain ATCC 35984 / RP62A) OX=176279 GN=SERP0974 PE=3 SV=1	SERP0974	10.162	9	1	1	4	0.823	0.865	1.324	1.242	0.874	0.845	1.35	0.101307
A0A6B9V364	Uncharacterized protein OS=Staphylococcus epidermidis OX=1282 PE=3 SV=1	--	27.514	13.2	3	1	4	1.109	0.977	0.766	1.031	1.03	1.132	0.848	0.146799
A0A509LTN9	Probable glycine dehydrogenase (decarboxylating) subunit 2 OS=Staphylococcus epidermidis OX=1282 GN=gcvPB PE=3 SV=1	gcvPB	56.402	56.6	19	1	41
A0A7H5C4G4	RepB family plasmid replication initiator protein OS=Staphylococcus epidermidis OX=1282 GN=F9B71_12365 PE=4 SV=1	F9B71_12365	26.515	4.1	1	1	2	0.964	1.003	1.015	1.02	0.978	1.034	1.021	0.391731
D4FNZ2	Cell envelope-like function transcriptional attenuator common domain protein OS=Staphylococcus epidermidis M23864:W2(grey) OX=525375 GN=lytR2 PE=3 SV=1	lytR2	35.16	44	12	12	48	1.048	0.96	0.976	0.956	1.058	1.042	0.919	0.000390974
D4FHU1	Serine protease OS=Staphylococcus epidermidis M23864:W2(grey) OX=525375 GN=gseA PE=3 SV=1	gseA	29.6	50.4	9	2	19	0.932	1.033	1.027	1.022	0.978	1.016	1.053	0.104957
Q8CSU0	Ribosome-recycling factor OS=Staphylococcus epidermidis (strain ATCC 12228 / FDA PCI 1200) OX=176280 GN=frr PE=3 SV=1	frr	20.332	76.6	17	12	76	0.964	1.034	1.047	1.051	0.929	0.965	1.096	0.00241374
Q8CRT1	Uncharacterized protein SE_1604 OS=Staphylococcus epidermidis (strain ATCC 12228 / FDA PCI 1200) OX=176280 GN=SE_1604 PE=3 SV=1	SE_1604	38.282	66.7	18	8	63	1.058	0.972	0.938	0.988	1.043	1.046	0.921	0.00658529
Q8CN38	Phosphoglucomutase OS=Staphylococcus epidermidis (strain ATCC 12228 / FDA PCI 1200) OX=176280 GN=pgcA PE=3 SV=1	pgcA	60.898	49.1	23	1	47	1.046	1.033	0.999	1.094	0.887	0.948	1.085	0.20315
Q8CSV0	30S ribosomal protein S16 OS=Staphylococcus epidermidis (strain ATCC 12228 / FDA PCI 1200) OX=176280 GN=rpsP PE=3 SV=1	rpsP	10.36	57.1	6	6	44	0.88	1.055	1.088	1.066	0.885	0.883	1.212	3.10556e-05
D2JD36	Thioredoxin reductase OS=Staphylococcus epidermidis OX=1282 GN=SAP025A_030 PE=3 SV=1	SAP025A_030	34.198	22.1	6	1	19	1.026	0.869	0.866	0.948	1.131	1.054	0.836	0.0123237
Q5HQI1	3-oxoacyl-[acyl-carrier-protein] synthase 2 OS=Staphylococcus epidermidis (strain ATCC 35984 / RP62A) OX=176279 GN=fabF PE=3 SV=1	fabF	129.95	26.1	24	18	129	0.998	1.006	1.004	1.016	0.993	0.97	1.022	0.0838105
Q5HMC8	Phosphomethylpyrimidine kinase OS=Staphylococcus epidermidis (strain ATCC 35984 / RP62A) OX=176279 GN=thiD-2 PE=3 SV=1	thiD-2	29.741	46.2	10	4	22	1.039	0.97	0.932	0.969	1.022	1.073	0.916	0.0107418
Q5HS21	Triacylglycerol lipase OS=Staphylococcus epidermidis (strain ATCC 35984 / RP62A) OX=176279 GN=SERP0018 PE=4 SV=1	SERP0018	164.11	9.8	13	11	21	1.172	0.94	0.883	0.876	1.162	1.158	0.773	0.000334399
Q5HMA5	Release factor glutamine methyltransferase OS=Staphylococcus epidermidis (strain ATCC 35984 / RP62A) OX=176279 GN=prmC PE=3 SV=1	prmC	77.635	12.8	9	5	10	1	1.012	0.906	1.059	0.955	1.017	1.002	0.998623
Q5HKM0	Dihydrolipoamide acetyltransferase component of pyruvate dehydrogenase complex OS=Staphylococcus epidermidis (strain ATCC 35984 / RP62A) OX=176279 GN=SERP2324 PE=3 SV=1	SERP2324	46.218	36.9	13	13	21	1.127	0.9	0.874	0.902	1.098	1.127	0.798	7.27534e-05
Q8CPV1	Na(+)/H(+) antiporter subunit D1 OS=Staphylococcus epidermidis (strain ATCC 12228 / FDA PCI 1200) OX=176280 GN=mnhD1 PE=3 SV=1	mnhD1	55.181	4	1	1	3
A0A0N1EK35	Reactive intermediate/imine deaminase OS=Staphylococcus epidermidis OX=1282 GN=ATM22_11195 PE=3 SV=1	ATM22_11195	13.966	17.5	2	2	7	0.958	1.043	1.009	1.001	1.021	1.02	1.018	0.501112
Q5HN25	Uncharacterized protein OS=Staphylococcus epidermidis (strain ATCC 35984 / RP62A) OX=176279 GN=SERP1447 PE=4 SV=1	SERP1447	6.9431	66.1	4	4	6	0.896	1.122	1.09	1.072	0.915	0.918	1.203	0.000270605
A0A0H2VHN6	Choline transport ATP-binding protein OS=Staphylococcus epidermidis (strain ATCC 12228 / FDA PCI 1200) OX=176280 GN=SE_0502 PE=4 SV=1	SE_0502	37.464	48.5	14	4	37	1.007	0.963	0.913	1.099	1.016	1.027	0.975	0.640608
Q8CST2	30S ribosomal protein S15 OS=Staphylococcus epidermidis (strain ATCC 12228 / FDA PCI 1200) OX=176280 GN=rpsO PE=3 SV=1	rpsO	10.637	50.6	3	3	4	0.862	0.847	1.074	1.184	0.889	0.885	1.178	0.197712
Q8CPC0	Phosphatidylglycerol lysyltransferase OS=Staphylococcus epidermidis (strain ATCC 12228 / FDA PCI 1200) OX=176280 GN=mprF PE=3 SV=1	mprF	97.218	5.8	4	4	5	0.997	0.957	1.003	0.971	1.016	1.057	0.955	0.104776
Q8CNN7	Probable manganese-dependent inorganic pyrophosphatase OS=Staphylococcus epidermidis (strain ATCC 12228 / FDA PCI 1200) OX=176280 GN=ppaC PE=3 SV=1	ppaC	34.232	86.4	24	24	147	0.993	1.011	1.018	1.005	0.988	1.008	1.015	0.101766
Q5HN58	Uncharacterized protein OS=Staphylococcus epidermidis (strain ATCC 35984 / RP62A) OX=176279 GN=SERP1414 PE=4 SV=1	SERP1414	6.309	79.2	5	5	15	0.983	1.047	1.01	0.98	1.023	0.982	1.016	0.529403
Q5HKL1	Uncharacterized protein OS=Staphylococcus epidermidis (strain ATCC 35984 / RP62A) OX=176279 GN=SERP2333 PE=4 SV=1	SERP2333	147.18	14.3	17	10	21	1.061	0.985	0.878	1.117	1.062	0.976	0.962	0.595089
Q8CPI9	Peptide deformylase-like OS=Staphylococcus epidermidis (strain ATCC 12228 / FDA PCI 1200) OX=176280 GN=SE_0890 PE=3 SV=1	SE_0890	18.229	21.6	2	2	3	0.864	1.101	1.16	0.925	0.913	1.026	1.137	0.212823
A0A7I0A4X3	Recombinase family protein OS=Staphylococcus epidermidis OX=1282 GN=CP553_11815 PE=3 SV=1	CP553_11815	23.564	37.9	7	2	8	0.998	1.019	1.018	1.002	0.981	0.998	1.021	0.0595891
Q5HLT8	Inositol monophosphatase family protein OS=Staphylococcus epidermidis (strain ATCC 35984 / RP62A) OX=176279 GN=SERP1894 PE=4 SV=1	SERP1894	58.858	25.4	11	8	23	0.98	1.025	1.03	1.008	1.008	0.95	1.043	0.0840523
Q5HM90	ATP-grasp domain-containing protein OS=Staphylococcus epidermidis (strain ATCC 35984 / RP62A) OX=176279 GN=SERP1739 PE=4 SV=1	SERP1739	121.73	32.6	29	1	75	0.89	1.086	1.119	1.162	0.879	0.845	1.288	0.000540894
A0A0E1VG67	S1 RNA binding domain protein OS=Staphylococcus epidermidis W23144 OX=525376 GN=HMPREF0791_0771 PE=4 SV=1	HMPREF0791_0771	47.813	12.8	7	2	10
Q5HEG2	Accessory gene regulator A OS=Staphylococcus aureus (strain COL) OX=93062 GN=agrA PE=1 SV=1	agrA	27.906	23.5	6	1	12	0.601	1.387	1.602	1.218	0.574	0.501	2.51	0.000675552
A0A7H5NN43	Serine protease OS=Staphylococcus epidermidis OX=1282 GN=ATM22_04695 PE=3 SV=1	ATM22_04695	30.842	39.7	8	1	18	1.031	1.004	0.93	0.965	1.073	1.032	0.924	0.0373923
Q5HKV0	Indole-3-pyruvate decarboxylase OS=Staphylococcus epidermidis (strain ATCC 35984 / RP62A) OX=176279 GN=ipdC PE=3 SV=1	ipdC	100.25	32.1	19	5	48	1.027	0.99	0.993	1.031	1.049	0.99	0.983	0.470873
Q8CMK6	Molybdenum cofactor biosynthesis protein B OS=Staphylococcus epidermidis (strain ATCC 12228 / FDA PCI 1200) OX=176280 GN=moaB PE=3 SV=1	moaB	19.795	48.3	6	1	10	1.07	0.95	0.948	0.981	1.112	1.037	0.894	0.00843145
Q8CMK7	Probable transglycosylase SceD OS=Staphylococcus epidermidis (strain ATCC 12228 / FDA PCI 1200) OX=176280 GN=sceD PE=3 SV=1	sceD	23.056	30.6	4	4	6	1.011	0.934	0.98	1.034	1.02	1.03	0.963	0.267381
A0A7H5C440	Universal stress protein OS=Staphylococcus epidermidis OX=1282 GN=E1N12_10540 PE=3 SV=1	E1N12_10540	15.205	53.3	6	6	12	1.046	0.982	0.914	1.01	1.06	1.018	0.93	0.0846317
Q8CNE0	Cyclic pyranopterin monophosphate synthase OS=Staphylococcus epidermidis (strain ATCC 12228 / FDA PCI 1200) OX=176280 GN=moaC PE=3 SV=1	moaC	17.556	52.5	7	7	20	1.048	0.964	0.843	1.015	1.04	1.05	0.899	0.120211
D4FIK9	HTH_40 domain-containing protein OS=Staphylococcus epidermidis M23864:W2(grey) OX=525375 GN=HMPREF0794_0510 PE=4 SV=1	HMPREF0794_0510	37.261	15.7	5	5	7	1.036	1.014	0.967	1.032	1.012	1.019	0.982	0.430154
Q5HNV6	Methyltransf_25 domain-containing protein OS=Staphylococcus epidermidis (strain ATCC 35984 / RP62A) OX=176279 GN=SERP1158 PE=4 SV=1	SERP1158	91.591	12.7	12	12	33	0.994	1.006	1.032	0.977	1.016	0.994	1.004	0.852348
Q5HP20	Elongation factor P OS=Staphylococcus epidermidis (strain ATCC 35984 / RP62A) OX=176279 GN=efp PE=3 SV=1	efp	20.594	82.7	12	1	76
A0A7I0AWZ7	Histidine kinase OS=Staphylococcus epidermidis OX=1282 GN=E1M98_12110 PE=4 SV=1	E1M98_12110	42.43	2.2	1	1	1	1.097	0.893	0.932	0.873	1.149	1.113	0.803	0.000740224
Q8CNW9	Uncharacterized peptidase SE_1383 OS=Staphylococcus epidermidis (strain ATCC 12228 / FDA PCI 1200) OX=176280 GN=SE_1383 PE=3 SV=2	SE_1383	40.183	49.6	14	14	64	1.034	0.966	1	0.962	1.032	1.041	0.942	0.00906331
Q8CSN8	DNA topoisomerase 4 subunit A OS=Staphylococcus epidermidis (strain ATCC 12228 / FDA PCI 1200) OX=176280 GN=parC PE=3 SV=1	parC	91.116	44.4	33	30	71	0.962	1.022	1.01	1.018	0.989	0.992	1.036	0.026008
A0A7I0BA89	Teichoic acid biosynthesis protein (Fragment) OS=Staphylococcus epidermidis OX=1282 GN=E1N10_13265 PE=4 SV=1	E1N10_13265	28.282	5.4	1	1	1
D4FJR6	Cell division protein SepF OS=Staphylococcus epidermidis M23864:W2(grey) OX=525375 GN=sepF PE=3 SV=1	sepF	22.723	54.8	7	7	24	0.956	1.057	1.046	1.052	0.963	0.935	1.105	0.000431768
Q5HE78	Putative aldehyde dehydrogenase OS=Staphylococcus aureus (strain COL) OX=93062 GN=SACOL2114 PE=3 SV=1	SACOL2114	51.968	15.2	8	2	26	0.986	0.963	1.006	1.035	1.001	0.98	1.012	0.612959
Q5HR93	Glycerol-3-phosphate cytidylyltransferase OS=Staphylococcus epidermidis (strain ATCC 35984 / RP62A) OX=176279 GN=tagD PE=4 SV=1	tagD	15.838	56.8	9	9	46	1.031	0.986	0.895	1.007	1.041	1.035	0.93	0.110565
Q5HLG8	FmtA-like protein OS=Staphylococcus epidermidis (strain ATCC 35984 / RP62A) OX=176279 GN=SERP2019 PE=4 SV=1	SERP2019	57.532	4.6	1	1	1	1	0.942	1.297	0.952	0.993	0.827	1.132	0.395187
A0A0H2VL11	Uncharacterized protein OS=Staphylococcus epidermidis (strain ATCC 12228 / FDA PCI 1200) OX=176280 GN=SE_p201 PE=4 SV=1	SE_p201	12.414	38.8	5	5	14	1.006	0.957	0.86	1.041	1.056	1.024	0.926	0.235488
D4FID9	Transcriptional repressor NrdR OS=Staphylococcus epidermidis M23864:W2(grey) OX=525375 GN=nrdR PE=3 SV=1	nrdR	16.972	63.9	9	9	30	1.116	0.946	0.866	0.96	1.101	1.014	0.858	0.0251581
Q8CRI9	50S ribosomal protein L13 OS=Staphylococcus epidermidis (strain ATCC 12228 / FDA PCI 1200) OX=176280 GN=rplM PE=3 SV=1	rplM	16.309	80	15	15	88	0.934	1.032	1	1.062	0.946	0.956	1.091	0.00959025
Q5HNW7	Chaperone protein DnaJ OS=Staphylococcus epidermidis (strain ATCC 35984 / RP62A) OX=176279 GN=dnaJ PE=3 SV=1	dnaJ	41.211	56	24	1	64	1.001	1.006	1.032	1.107	0.944	0.919	1.098	0.0705251
A0A0E1VHX2	30S ribosomal protein S11 OS=Staphylococcus epidermidis W23144 OX=525376 GN=rpsK PE=3 SV=1	rpsK	39.499	33	13	10	86	0.963	1.043	1.044	1.038	0.959	0.962	1.084	3.23906e-06
Q8CT19	Phosphoenolpyruvate-protein phosphotransferase OS=Staphylococcus epidermidis (strain ATCC 12228 / FDA PCI 1200) OX=176280 GN=ptsI PE=3 SV=1	ptsI	63.361	78.1	35	4	233	0.932	0.98	1.048	0.99	1.002	1.023	1.021	0.586006
A0A0H2VEN2	Putative endonuclease III OS=Staphylococcus epidermidis (strain ATCC 12228 / FDA PCI 1200) OX=176280 GN=SE_0381 PE=4 SV=1	SE_0381	70.946	11.5	5	4	7	1.052	0.992	0.966	1.018	0.959	1.064	0.968	0.428437
Q8CPF0	DNA mismatch repair protein MutS OS=Staphylococcus epidermidis (strain ATCC 12228 / FDA PCI 1200) OX=176280 GN=mutS PE=3 SV=1	mutS	100.78	53	42	3	96	1.034	0.978	0.987	1.018	0.961	1.034	0.985	0.614545
Q5HLC2	RelA_SpoT domain-containing protein OS=Staphylococcus epidermidis (strain ATCC 35984 / RP62A) OX=176279 GN=SERP2065 PE=4 SV=1	SERP2065	136.95	14.5	18	12	55	1.112	0.933	0.892	0.937	1.137	1.046	0.838	0.00395403
A0A0H2VGJ6	Protease OS=Staphylococcus epidermidis (strain ATCC 12228 / FDA PCI 1200) OX=176280 GN=SE_1296 PE=4 SV=1	SE_1296	35.916	40.1	10	1	26
Q5HNQ5	Uncharacterized protein OS=Staphylococcus epidermidis (strain ATCC 35984 / RP62A) OX=176279 GN=SERP1210 PE=4 SV=1	SERP1210	11.663	12.3	1	1	1
A0A0H2WYW4	HD domain-containing protein OS=Staphylococcus aureus (strain COL) OX=93062 GN=SACOL1649 PE=4 SV=1	SACOL1649	77.952	3.8	3	1	9	1.027	0.954	1.013	0.982	1.066	0.991	0.956	0.177182
Q5HPW6	Alkaline shock protein 23 OS=Staphylococcus epidermidis (strain ATCC 35984 / RP62A) OX=176279 GN=SERP0791 PE=3 SV=1	SERP0791	135.55	12.3	13	6	39	1.026	0.933	0.971	0.949	1.045	1.027	0.921	0.00317114
Q7DI59	Thymidylate synthase OS=Staphylococcus epidermidis OX=1282 GN=thyE PE=3 SV=1	thyE	37.177	40.3	13	1	29	1.048	0.511		1.289	0.765	1.458	0.825	0.578927
Q5HQY8	Uncharacterized protein OS=Staphylococcus epidermidis (strain ATCC 35984 / RP62A) OX=176279 GN=SERP0408 PE=4 SV=1	SERP0408	12.477	82.1	7	7	21	1.086	0.964	0.897	0.96	1.058	1.08	0.875	0.00556793
Q5HFB6	50S ribosomal protein L21 OS=Staphylococcus aureus (strain COL) OX=93062 GN=rplU PE=3 SV=1	rplU	11.333	36.3	3	1	13	0.839	1.102	1.169	1.039	0.935	0.9	1.238	0.010163
A0A4Y7VRU1	MarR family transcriptional regulator OS=Staphylococcus epidermidis OX=1282 GN=ATM22_02810 PE=4 SV=1	ATM22_02810	13.59	75.4	11	2	37	1.16	0.861	0.761	0.926	1.163	1.156	0.732	0.0053576
Q8CP17	Chaperone protein DnaK OS=Staphylococcus epidermidis (strain ATCC 12228 / FDA PCI 1200) OX=176280 GN=dnaK PE=3 SV=1	dnaK	66.159	84.6	54	32	303	0.888	1.084	1.107	1.101	0.893	0.898	1.229	8.27201e-06
A0A0H2WWI4	Pectate_lyase_3 domain-containing protein OS=Staphylococcus aureus (strain COL) OX=93062 GN=SACOL1980 PE=4 SV=1	SACOL1980	40.719	3.3	1	1	1
A0A7I0BVE8	Sensor histidine kinase OS=Staphylococcus epidermidis OX=1282 GN=ATM22_02335 PE=4 SV=1	ATM22_02335	39.844	57	15	1	25	0.79	1.348	1.365	1.149	0.568	0.694	1.882	0.00450593
Q5HPM6	Uncharacterized protein OS=Staphylococcus epidermidis (strain ATCC 35984 / RP62A) OX=176279 GN=SERP0884 PE=4 SV=1	SERP0884	7.4874	84.6	6	6	28	1.007	0.969	0.995	0.941	1.015	1.043	0.948	0.0496079
Q5HLS2	Phosphosugar-binding transcriptional regulator OS=Staphylococcus epidermidis (strain ATCC 35984 / RP62A) OX=176279 GN=SERP1910 PE=4 SV=1	SERP1910	29.897	26.9	7	7	10	1.123	1.042	0.885	1.008	1.082	0.928	0.937	0.448768
A0A7H5CB22	UDP-N-acetylmuramoyl-L-alanyl-D-glutamate--L-lysine ligase OS=Staphylococcus epidermidis OX=1282 GN=murE PE=3 SV=1	murE	54.289	51.8	18	1	43	0.86	0.985	1.17	1.199	0.796	0.963	1.281	0.0410206
D4FHS6	Transcription-repair-coupling factor OS=Staphylococcus epidermidis M23864:W2(grey) OX=525375 GN=mfd PE=3 SV=1	mfd	134.4	36.5	34	1	56	1.034	0.984	1.076	0.946	0.968	1.012	0.997	0.934434
Q5HPI7	Glycerol-3-phosphate acyltransferase OS=Staphylococcus epidermidis (strain ATCC 35984 / RP62A) OX=176279 GN=plsY PE=3 SV=1	plsY	22.115	6.9	1	1	1	1.231	0.847	0.684	1.034	1.162	1.122	0.73	0.0549306
A0A7I0ARE8	Acetylornithine aminotransferase OS=Staphylococcus epidermidis OX=1282 GN=argD PE=3 SV=1	argD	86.259	20.4	13	1	27
Q8CPC7	Transketolase OS=Staphylococcus epidermidis (strain ATCC 12228 / FDA PCI 1200) OX=176280 GN=tkt PE=3 SV=1	tkt	72.947	63.6	35	2	214	1.109	1.013	1.058	0.791	1.036	1.03	0.901	0.300745
Q5HRX7	Uncharacterized protein OS=Staphylococcus epidermidis (strain ATCC 35984 / RP62A) OX=176279 GN=SERP0064 PE=4 SV=1	SERP0064	59.689	30.8	17	13	48	0.995	1.03	1.02	1.034	0.984	0.982	1.042	0.00211309
Q8CQP4	30S ribosomal protein S6 OS=Staphylococcus epidermidis (strain ATCC 12228 / FDA PCI 1200) OX=176280 GN=rpsF PE=3 SV=1	rpsF	11.735	68.4	12	12	103	0.977	1.018	1.017	1.005	0.988	1	1.025	0.0338242
A0A7I0ABC9	YihA family ribosome biogenesis GTP-binding protein (Fragment) OS=Staphylococcus epidermidis OX=1282 GN=E1N10_11615 PE=3 SV=1	E1N10_11615	21.63	52.7	10	8	34	0.882	1.025	1.055	1.062	0.952	0.954	1.127	0.0127869
A0A0H2VK93	Replication initiation protein OS=Staphylococcus epidermidis (strain ATCC 12228 / FDA PCI 1200) OX=176280 GN=SE_p203 PE=3 SV=1	SE_p203	36.894	35.9	12	10	22	1.015	1.006	0.971	0.973	0.953	1.012	0.99	0.697446
Q5HN94	Cmp-binding-factor 1 OS=Staphylococcus epidermidis (strain ATCC 35984 / RP62A) OX=176279 GN=cbf1 PE=4 SV=1	cbf1	35.731	50.5	13	1	37	0.906	0.985	1.112	1.034	0.954	1.009	1.091	0.137418
Q5HL15	Acyl-CoA synthetase OS=Staphylococcus epidermidis (strain ATCC 35984 / RP62A) OX=176279 GN=SERP2172 PE=4 SV=1	SERP2172	200.71	19.5	32	3	77	1.022	1.022	1.01	0.958	1.002	1.009	0.986	0.518631
Q5HM65	Diadenylate cyclase OS=Staphylococcus epidermidis (strain ATCC 35984 / RP62A) OX=176279 GN=dacA PE=3 SV=1	dacA	73.99	16	12	6	18	1.068	0.984	0.871	1.036	1.065	1.01	0.92	0.190604
A0A7I0APW0	Uncharacterized protein (Fragment) OS=Staphylococcus epidermidis OX=1282 GN=E1N00_11160 PE=4 SV=1	E1N00_11160	6.7704	25.5	1	1	4	0.922	1.116	0.982	1.108	0.958	0.914	1.147	0.0363241
Q5HLM2	GCN5-related N-acetyltransferase OS=Staphylococcus epidermidis (strain ATCC 35984 / RP62A) OX=176279 GN=SERP1963 PE=3 SV=1	SERP1963	137.66	6.4	8	3	13	0.985	0.988	1.017	1.022	1	0.97	1.024	0.155051
Q5HLH1	Metallophos domain-containing protein OS=Staphylococcus epidermidis (strain ATCC 35984 / RP62A) OX=176279 GN=SERP2016 PE=4 SV=1	SERP2016	31.321	10.4	3	3	3	0.874	0.943	0.971	1.2	1.029	0.993	1.075	0.488454
A0A0E1VDR7	Quinol oxidase subunit 1 OS=Staphylococcus epidermidis W23144 OX=525376 GN=qoxB PE=3 SV=1	qoxB	161.58	9.1	10	1	40	0.532	0.646	1.705	1.148	1.274	0.685	1.405	0.432434
A0A0H2VIR8	Xaa-Pro dipeptidase OS=Staphylococcus epidermidis (strain ATCC 12228 / FDA PCI 1200) OX=176280 GN=SE_1214 PE=3 SV=1	SE_1214	83.677	39.3	27	23	95	1.045	0.973	0.946	0.978	1.069	1.035	0.92	0.00408487
A0A384ZN61	Elongation factor Tu (Fragment) OS=Staphylococcus epidermidis OX=1282 GN=tufA PE=4 SV=1	tufA	18.041	92.1	17	1	219	1.054	1.025	0.893	0.924	1.163	0.99	0.886	0.126773
D4FJP2	Primosomal protein N' OS=Staphylococcus epidermidis M23864:W2(grey) OX=525375 GN=priA PE=3 SV=1	priA	92.835	26.8	20	20	32	1.009	0.994	0.99	1.006	1.019	0.984	0.993	0.56166
Q5HPQ7	Putative competence-damage inducible protein OS=Staphylococcus epidermidis (strain ATCC 35984 / RP62A) OX=176279 GN=cinA PE=3 SV=1	cinA	102.3	23.8	17	3	36	0.938	1.026	1.038	1.02	1.005	0.96	1.062	0.0436474
A0A7U0AAC4	3-phosphoshikimate 1-carboxyvinyltransferase OS=Staphylococcus epidermidis OX=1282 GN=aroA PE=4 SV=1	aroA	47.003	31.4	10	10	23	1.002	0.984	0.974	0.994	1.052	0.992	0.969	0.178658
Q5HNB9	Uncharacterized protein OS=Staphylococcus epidermidis (strain ATCC 35984 / RP62A) OX=176279 GN=SERP1351 PE=4 SV=1	SERP1351	34.956	47.7	13	2	43	0.978	1.069	1.083	0.987	1.011	0.875	1.096	0.151757
Q5HG21	Alanine racemase 2 OS=Staphylococcus aureus (strain COL) OX=93062 GN=alr2 PE=3 SV=1	alr2	41.409	5	2	2	3	0.954	1.021	1.11	0.97	0.931	1.001	1.074	0.188533
Q8CQP6	30S ribosomal protein S18 OS=Staphylococcus epidermidis (strain ATCC 12228 / FDA PCI 1200) OX=176280 GN=rpsR PE=3 SV=1	rpsR	9.2938	36.2	4	4	18	1.11	0.926	0.834	0.968	1.106	1.064	0.832	0.0157802
A0A7I0APN2	Sensor histidine kinase (Fragment) OS=Staphylococcus epidermidis OX=1282 GN=E1N00_12430 PE=4 SV=1	E1N00_12430	26.709	19.1	4	1	5	1	1.037	0.966	0.992	0.93	1.087	0.993	0.913815
Q5HQR4	Uncharacterized protein OS=Staphylococcus epidermidis (strain ATCC 35984 / RP62A) OX=176279 GN=SERP0484 PE=3 SV=1	SERP0484	102.71	6.8	7	1	43
A0A7I0AXQ0	AAA_27 domain-containing protein (Fragment) OS=Staphylococcus epidermidis OX=1282 GN=E1M98_11895 PE=4 SV=1	E1M98_11895	57.642	57.2	27	1	73	1.018	1.003	1.001	1.01	0.945	1.038	1.004	0.867054
A0A0H2VHE9	Putative PP2C protein phosphatase OS=Staphylococcus epidermidis (strain ATCC 12228 / FDA PCI 1200) OX=176280 GN=SE_0894 PE=4 SV=1	SE_0894	28.409	36.4	9	3	18	0.91	1.09	1.052	0.957	0.9	1.024	1.094	0.189094
A0A5E9MEV2	Homoserine dehydrogenase OS=Staphylococcus epidermidis OX=1282 GN=CP553_05680 PE=3 SV=1	CP553_05680	46.923	12.4	3	3	3	0.871	1.074	1.078	1.123	0.932	0.913	1.206	0.00159778
Q8CQS1	UPF0753 protein SE_2332 OS=Staphylococcus epidermidis (strain ATCC 12228 / FDA PCI 1200) OX=176280 GN=SE_2332 PE=3 SV=1	SE_2332	98.958	29.8	24	1	37
Q8CQK5	DNA replication and repair protein RecF OS=Staphylococcus epidermidis (strain ATCC 12228 / FDA PCI 1200) OX=176280 GN=recF PE=3 SV=1	recF	42.607	24.3	5	1	8	0.93	0.949	1.013	1.101	1.074	0.953	1.036	0.598071
D4FL81	N-acetylmuramoyl-L-alanine amidase OS=Staphylococcus epidermidis M23864:W2(grey) OX=525375 GN=HMPREF0794_1319 PE=3 SV=1	HMPREF0794_1319	73.642	46.4	19	2	35	1.288	0.778	0.812	0.978	1.201	1.032	0.729	0.0300088
Q5HR60	Uncharacterized protein OS=Staphylococcus epidermidis (strain ATCC 35984 / RP62A) OX=176279 GN=SERP0333 PE=4 SV=1	SERP0333	11.311	49	7	7	24	0.993	1.042	1.017	0.99	0.984	0.986	1.029	0.131999
Q5HN87	Autolysin sensor kinase OS=Staphylococcus epidermidis (strain ATCC 35984 / RP62A) OX=176279 GN=SERP1385 PE=4 SV=1	SERP1385	43.046	16.7	5	4	6
Q8CN89	Uncharacterized lipoprotein SE_1947 OS=Staphylococcus epidermidis (strain ATCC 12228 / FDA PCI 1200) OX=176280 GN=SE_1947 PE=3 SV=1	SE_1947	24.088	64.7	11	4	79	1.006	1.022	1.01	0.992	0.95	0.987	1.028	0.222028
D4FNW7	ATP-dependent helicase/nuclease subunit A OS=Staphylococcus epidermidis M23864:W2(grey) OX=525375 GN=addA PE=3 SV=1	addA	143.02	30.4	33	1	55	1.004	0.995	0.998	0.968	1.04	1.021	0.966	0.0701552
D4FJR7	Pyridoxal phosphate homeostasis protein OS=Staphylococcus epidermidis M23864:W2(grey) OX=525375 GN=ylmE PE=3 SV=1	ylmE	25.367	32	9	8	14	1	1.006	0.984	0.984	1.004	1.031	0.98	0.168932
Q5HQ57	Uncharacterized protein OS=Staphylococcus epidermidis (strain ATCC 35984 / RP62A) OX=176279 GN=SERP0700 PE=4 SV=1	SERP0700	18.578	43.8	7	7	25	0.979	1.027	1.031	0.996	0.992	1.006	1.026	0.131165
D4FIQ1	Uncharacterized protein OS=Staphylococcus epidermidis M23864:W2(grey) OX=525375 GN=HMPREF0794_0552 PE=4 SV=1	HMPREF0794_0552	7.4365	23.4	1	1	2	1.037	0.998	0.876	1.031	1.152	0.95	0.925	0.362144
A0A7U0ABD5	Dihydrolipoyl dehydrogenase OS=Staphylococcus epidermidis OX=1282 GN=lpdA PE=4 SV=1	lpdA	48.869	25.6	10	1	13	1.02	0.944	1.084	1.044	0.976	0.946	1.044	0.419059
A0A5E9MGZ2	UDP-N-acetylmuramate--L-alanine ligase OS=Staphylococcus epidermidis OX=1282 GN=murC PE=3 SV=1	murC	49.576	60.4	21	21	77	1.03	0.976	0.993	0.996	1.005	1.018	0.971	0.0370356
A0A0E1VKR1	30S ribosomal protein S4 OS=Staphylococcus epidermidis W23144 OX=525376 GN=rpsD PE=3 SV=1	rpsD	23.106	62	11	1	81
Q8GQQ1	Signal transduction protein TRAP OS=Staphylococcus epidermidis OX=1282 GN=traP PE=1 SV=1	traP	19.528	34.1	5	5	27	1.058	0.96	0.922	0.98	1.07	1.055	0.899	0.00443673
Q8CRH8	50S ribosomal protein L30 OS=Staphylococcus epidermidis (strain ATCC 12228 / FDA PCI 1200) OX=176280 GN=rpmD PE=3 SV=1	rpmD	6.5816	71.2	6	6	71	0.848	1.072	1.102	1.064	0.898	0.923	1.213	0.00203868
A0A0U2CIK7	Uncharacterized protein OS=Staphylococcus epidermidis OX=1282 PE=4 SV=1	--	7.9262	16.7	1	1	1
A0A7I0AX57	N-acetylglucosaminyldiphosphoundecaprenol N-acetyl-beta-D-mannosaminyltransferase OS=Staphylococcus epidermidis OX=1282 GN=E1M98_10555 PE=3 SV=1	E1M98_10555	29.521	39.3	6	6	10	1.014	1.025	1.03	1.024	0.99	0.974	1.034	0.0472803
Q5HNN4	Uroporphyrinogen-III synthase OS=Staphylococcus epidermidis (strain ATCC 35984 / RP62A) OX=176279 GN=hemD PE=3 SV=1	hemD	26.283	15.9	3	3	4	0.973	1.061	1.087	1.003	0.882	0.992	1.107	0.0785186
Q8CNW8	Alanine dehydrogenase OS=Staphylococcus epidermidis (strain ATCC 12228 / FDA PCI 1200) OX=176280 GN=ald PE=3 SV=1	ald	40.194	80.9	23	20	295	1.079	0.926	0.931	0.954	1.058	1.057	0.88	0.00035612
Q5HS02	Trans-sulfuration enzyme family protein OS=Staphylococcus epidermidis (strain ATCC 35984 / RP62A) OX=176279 GN=SERP0037 PE=3 SV=1	SERP0037	41.345	23.7	7	7	14	0.858	1.145	1.109	1.24	0.808	0.812	1.41	0.000867777
Q8CPJ6	Dihydroorotase OS=Staphylococcus epidermidis (strain ATCC 12228 / FDA PCI 1200) OX=176280 GN=pyrC PE=3 SV=1	pyrC	46.765	54.4	21	2	59	0.856	1.23	1.325	0.972	0.811	0.869	1.391	0.0282359
Q5HRQ0	Tetrapyrrole methylase family protein OS=Staphylococcus epidermidis (strain ATCC 35984 / RP62A) OX=176279 GN=SERP0143 PE=4 SV=1	SERP0143	45.728	36.4	11	1	19	1.057	1.278	0.829	1	1.047	0.812	1.066	0.736615
Q5HLT4	Uncharacterized protein OS=Staphylococcus epidermidis (strain ATCC 35984 / RP62A) OX=176279 GN=SERP1898 PE=4 SV=1	SERP1898	72.396	26.1	16	11	26	0.841	1.144	1.102	1.121	0.871	0.87	1.304	7.31965e-05
A0A7I0AVD9	NDxxF motif lipoprotein OS=Staphylococcus epidermidis OX=1282 GN=ATM22_11555 PE=4 SV=1	ATM22_11555	23.778	52.2	12	3	36	0.792	1.17	1.147	0.977	0.878	0.882	1.291	0.0194602
Q5HPN7	RNA-binding protein Hfq OS=Staphylococcus epidermidis (strain ATCC 35984 / RP62A) OX=176279 GN=hfq PE=3 SV=1	hfq	9.0218	43	3	3	4	0.998	1.032	1.034	1.04	0.994	0.916	1.068	0.0762058
Q5HLM8	L-lactate permease OS=Staphylococcus epidermidis (strain ATCC 35984 / RP62A) OX=176279 GN=SERP1957 PE=3 SV=1	SERP1957	107.2	22.8	18	4	32	0.982	1.031	1.006	0.97	0.994	1.033	0.999	0.976131
Q8CNV8	Catabolite control protein A OS=Staphylococcus epidermidis (strain ATCC 12228 / FDA PCI 1200) OX=176280 GN=ccpA PE=3 SV=2	ccpA	36.465	69.9	19	19	78	1.043	0.991	0.942	0.972	1.056	1.029	0.929	0.0110228
Q8CPH1	ATP-dependent protease subunit HslV OS=Staphylococcus epidermidis (strain ATCC 12228 / FDA PCI 1200) OX=176280 GN=hslV PE=3 SV=1	hslV	19.446	77.2	8	1	33	0.955	1.043	0.996	1.123	0.955	0.965	1.1	0.0555516
D4FHI9	Hydroxyethylthiazole kinase OS=Staphylococcus epidermidis M23864:W2(grey) OX=525375 GN=thiM PE=3 SV=1	thiM	69.747	24.1	10	5	15	1.07	0.93	0.956	0.988	1.063	1.017	0.912	0.0178995
Q5HNX1	30S ribosomal protein S21 OS=Staphylococcus epidermidis (strain ATCC 35984 / RP62A) OX=176279 GN=rpsU PE=3 SV=1	rpsU	6.9721	48.3	5	5	20	0.927	1.081	1.103	0.991	0.932	0.91	1.147	0.0156423
Q5HH31	Bifunctional autolysin OS=Staphylococcus aureus (strain COL) OX=93062 GN=atl PE=3 SV=1	atl	137.33	4.2	6	2	19	1.068	0.954	1.006	0.897	1.11	1.009	0.896	0.0640965
Q8CPY7	Epimerase family protein SE_0553 OS=Staphylococcus epidermidis (strain ATCC 12228 / FDA PCI 1200) OX=176280 GN=SE_0553 PE=3 SV=1	SE_0553	34.418	52.5	12	1	28	0.934	1.057	1.047	1.054	0.941	0.968	1.111	0.000728041
Q5HQE4	Peptide chain release factor 3 OS=Staphylococcus epidermidis (strain ATCC 35984 / RP62A) OX=176279 GN=prfC PE=3 SV=1	prfC	105.04	28.3	23	19	63	1.029	1.007	0.992	1.026	1.013	0.99	0.998	0.885472
A0A7T9WSD6	MetQ/NlpA family ABC transporter substrate-binding protein OS=Staphylococcus epidermidis OX=1282 GN=I6I40_10900 PE=4 SV=1	I6I40_10900	30.156	59.3	16	3	45	0.697	1.18	1.382	1.032	0.793	0.858	1.531	0.0152971
A0A7H5C4N6	t(6)A37 threonylcarbamoyladenosine biosynthesis protein TsaE OS=Staphylococcus epidermidis OX=1282 GN=tsaE PE=3 SV=1	tsaE	17.313	28.1	4	4	4	1.022	0.984	0.968	0.959	1.024	1.071	0.934	0.0161155
Q5HGZ1	Pyruvate dehydrogenase E1 component subunit alpha OS=Staphylococcus aureus (strain COL) OX=93062 GN=pdhA PE=3 SV=1	pdhA	41.382	25.9	8	1	63	0.899	1.096	1.064	1.167	0.707	1.034	1.26	0.101031
Q8CRC8	Ribose-5-phosphate isomerase A OS=Staphylococcus epidermidis (strain ATCC 12228 / FDA PCI 1200) OX=176280 GN=rpiA PE=3 SV=1	rpiA	25.628	36.1	5	5	8	1.037	0.967	0.893	1.005	1.072	1.048	0.908	0.053203
Q8CS48	Tyrosine--tRNA ligase OS=Staphylococcus epidermidis (strain ATCC 12228 / FDA PCI 1200) OX=176280 GN=tyrS PE=3 SV=1	tyrS	47.642	63.4	23	1	71	0.76	1.172	1.327	0.983	0.815	0.898	1.408	0.0276782
Q5HRM0	Uncharacterized protein OS=Staphylococcus epidermidis (strain ATCC 35984 / RP62A) OX=176279 GN=SERP0173 PE=4 SV=1	SERP0173	20.522	39.4	6	6	9	0.986	1.031	0.976	1.023	1.006	1.012	1.009	0.679307
Q8CMN6	tRNA uridine 5-carboxymethylaminomethyl modification enzyme MnmG OS=Staphylococcus epidermidis (strain ATCC 12228 / FDA PCI 1200) OX=176280 GN=mnmG PE=3 SV=1	mnmG	69.804	44.5	22	22	53	1.002	1.008	1.013	1.018	1.003	0.999	1.012	0.0200558
Q5HP93	DD-transpeptidase OS=Staphylococcus epidermidis (strain ATCC 35984 / RP62A) OX=176279 GN=pbp2 PE=4 SV=1	pbp2	82.408	47	31	25	105	0.99	0.999	0.987	1.015	0.97	1.013	1.009	0.560262
Q8CS43	tRNA (guanine-N(7)-)-methyltransferase OS=Staphylococcus epidermidis (strain ATCC 12228 / FDA PCI 1200) OX=176280 GN=trmB PE=3 SV=1	trmB	25.716	31.6	6	6	16	0.956	1.084	0.996	1.03	1.015	0.974	1.056	0.148184
Q8CNP1	NH(3)-dependent NAD(+) synthetase OS=Staphylococcus epidermidis (strain ATCC 12228 / FDA PCI 1200) OX=176280 GN=nadE PE=3 SV=1	nadE	30.879	35.6	8	8	30	1.006	1.005	0.989	0.983	1.002	1	0.99	0.202601
A0A0H2VF16	Uncharacterized protein OS=Staphylococcus epidermidis (strain ATCC 12228 / FDA PCI 1200) OX=176280 GN=SE_0474 PE=3 SV=1	SE_0474	51.597	32.3	12	3	33	0.944	0.865	1.065	1.067	1.026	1.052	0.992	0.883865
Q5HQS8	Uncharacterized protein OS=Staphylococcus epidermidis (strain ATCC 35984 / RP62A) OX=176279 GN=SERP0469 PE=4 SV=1	SERP0469	28.609	14.5	3	3	3	0.761	1.274	1.071	1.325	0.808	0.71	1.61	0.00326416
D4FLR3	50S ribosomal protein L9 OS=Staphylococcus epidermidis M23864:W2(grey) OX=525375 GN=rplI PE=3 SV=1	rplI	77.673	16.6	16	12	70	1.022	0.994	0.974	1.033	0.999	0.977	1.001	0.969764
D4FJH7	Peptidase M16 inactive domain protein OS=Staphylococcus epidermidis M23864:W2(grey) OX=525375 GN=HMPREF0794_0715 PE=4 SV=1	HMPREF0794_0715	50.407	35.9	13	11	24	0.956	1.06	1.073	1.004	0.95	0.972	1.09	0.0163546
A0A0H2WYL8	Uncharacterized protein OS=Staphylococcus aureus (strain COL) OX=93062 GN=SACOL1151 PE=4 SV=1	SACOL1151	10.281	10.2	2	2	2	1.058	0.962	0.941	0.986	1.08	1.012	0.917	0.0212192
Q5HDW7	30S ribosomal protein S17 OS=Staphylococcus aureus (strain COL) OX=93062 GN=rpsQ PE=3 SV=1	rpsQ	10.175	49.4	5	1	13
A0A0H2VGD3	Indigoidine systhesis protein OS=Staphylococcus epidermidis (strain ATCC 12228 / FDA PCI 1200) OX=176280 GN=SE_0343 PE=4 SV=1	SE_0343	24.803	31.6	5	2	6	0.988	1.002	1.048	0.93	0.975	1.074	0.981	0.69831
A0A7I0AWJ5	DUF3310 domain-containing protein OS=Staphylococcus epidermidis OX=1282 GN=E1N00_01035 PE=4 SV=1	E1N00_01035	17.164	9.5	1	1	1	1.102	0.893	0.934	0.724	1.134	1.275	0.727	0.0231203
D4FHI0	D-alanine--D-alanine ligase OS=Staphylococcus epidermidis M23864:W2(grey) OX=525375 GN=ddlA PE=3 SV=1	ddlA	96.98	36.6	29	9	106	0.968	1.036	0.981	1.034	0.98	0.995	1.037	0.141319
Q5HGI0	Tyrosine recombinase XerC OS=Staphylococcus aureus (strain COL) OX=93062 GN=xerC PE=3 SV=1	xerC	35.112	3.7	1	1	2	0.754	1.22	1.302	0.94	0.812	0.927	1.389	0.0503767
Q8CTG8	Histidinol-phosphate aminotransferase OS=Staphylococcus epidermidis (strain ATCC 12228 / FDA PCI 1200) OX=176280 GN=hisC PE=3 SV=1	hisC	98.927	19.2	14	11	24	0.966	1.037	1.054	1.106	0.931	0.928	1.132	0.00602409
A0A7G9EGF5	DUF4467 domain-containing protein OS=Staphylococcus epidermidis OX=1282 GN=ATM22_02255 PE=4 SV=1	ATM22_02255	14.08	41.2	5	5	14	1.118	0.874	0.801	0.948	1.154	1.097	0.779	0.00767882
Q5HQU7	Carboxylesterase OS=Staphylococcus epidermidis (strain ATCC 35984 / RP62A) OX=176279 GN=est PE=4 SV=1	est	28.322	41.5	10	10	24	0.974	1.047	1.046	1.011	0.944	0.967	1.076	0.00799108
H9BQQ0	50S ribosomal protein L3 OS=Staphylococcus pettenkoferi OX=170573 GN=rplC PE=3 SV=1	rplC	23.728	22.7	6	1	39	0.315	0.898	1.252	0.55	1.589	1.423	0.812	0.938524
D4FM33	YibE/F-like protein OS=Staphylococcus epidermidis M23864:W2(grey) OX=525375 GN=HMPREF0794_1621 PE=4 SV=1	HMPREF0794_1621	29.307	3.1	1	1	1	1.068	1.069	0.893	0.951	0.974	1.072	0.935	0.32624
A0A7I0A501	ArgR family transcriptional regulator (Fragment) OS=Staphylococcus epidermidis OX=1282 GN=E1N12_12090 PE=3 SV=1	E1N12_12090	13.149	18.2	3	3	3	1.047	0.989	0.98	0.994	0.984	1.031	0.968	0.163907
Q5HL82	CapA protein OS=Staphylococcus epidermidis (strain ATCC 35984 / RP62A) OX=176279 GN=capA PE=3 SV=1	capA	40.731	14.6	5	5	5	0.971	0.99	1.028	1.072	0.949	0.982	1.065	0.0678383
Q8CSV6	50S ribosomal protein L28 OS=Staphylococcus epidermidis (strain ATCC 12228 / FDA PCI 1200) OX=176280 GN=rpmB PE=3 SV=1	rpmB	6.9551	51.6	6	6	35	0.958	1.024	1.04	1.014	0.992	0.962	1.057	0.0137728
Q8CTR9	FMN-dependent NADPH-azoreductase OS=Staphylococcus epidermidis (strain ATCC 12228 / FDA PCI 1200) OX=176280 GN=azo1 PE=3 SV=1	azo1	20.729	35.6	4	4	16	1.033	0.987	0.964	0.968	1.094	0.98	0.939	0.13245
Q5HL44	Fructosamine kinase family protein OS=Staphylococcus epidermidis (strain ATCC 35984 / RP62A) OX=176279 GN=SERP2143 PE=3 SV=1	SERP2143	102.42	24.7	18	7	34	0.958	1.048	1.05	1.082	0.972	0.933	1.111	0.00267636
D4FJQ0	Orotate phosphoribosyltransferase OS=Staphylococcus epidermidis M23864:W2(grey) OX=525375 GN=pyrE PE=3 SV=1	pyrE	67.608	37	19	1	38
A0A7G9EGG5	Dipeptidyl aminopeptidase OS=Staphylococcus epidermidis OX=1282 GN=ATM22_04935 PE=4 SV=1	ATM22_04935	29.477	12.3	3	3	3	0.896	1.115	1.129	0.968	0.963	0.924	1.154	0.0576237
Q8CP70	CCA-adding enzyme OS=Staphylococcus epidermidis (strain ATCC 12228 / FDA PCI 1200) OX=176280 GN=cca PE=3 SV=1	cca	46.65	23	11	4	12	0.944	1.01	1.033	1.037	0.977	0.951	1.072	0.00624123
Q8CNT5	S-adenosylmethionine synthase OS=Staphylococcus epidermidis (strain ATCC 12228 / FDA PCI 1200) OX=176280 GN=metK PE=3 SV=1	metK	43.992	45.4	17	1	40	1.01	1.015	0.859	1.098	1.032	1.014	0.973	0.673451
Q8CNI7	Peptide chain release factor 1 OS=Staphylococcus epidermidis (strain ATCC 12228 / FDA PCI 1200) OX=176280 GN=prfA PE=3 SV=1	prfA	40.377	63.7	21	21	72	1.004	0.998	0.974	0.974	1.026	1.026	0.964	0.0279042
A0A0H2VGU8	Uncharacterized protein OS=Staphylococcus epidermidis (strain ATCC 12228 / FDA PCI 1200) OX=176280 GN=SE_1476 PE=4 SV=1	SE_1476	36.205	20.7	6	3	10	1.028	0.99	0.875	1.052	1.074	1.017	0.935	0.287076
A0A7I0AMK1	Protein RecA OS=Staphylococcus epidermidis OX=1282 GN=recA PE=3 SV=1	recA	37.684	54.2	17	17	61	0.974	1.033	1.003	1.056	0.979	0.952	1.064	0.022458
Q8CPG2	Ribosome-binding factor A OS=Staphylococcus epidermidis (strain ATCC 12228 / FDA PCI 1200) OX=176280 GN=rbfA PE=3 SV=1	rbfA	13.472	61.2	7	7	39	1.022	0.995	1.018	1.014	1.014	0.972	1.006	0.723632
A0A7I0AL46	PIN/TRAM domain-containing protein OS=Staphylococcus epidermidis OX=1282 GN=E1N03_05865 PE=3 SV=1	E1N03_05865	39.17	12.8	3	3	6	0.924	1.087	1.186	0.959	0.891	0.962	1.164	0.0861157
D4FM86	LPXTG-motif cell wall anchor domain protein OS=Staphylococcus epidermidis M23864:W2(grey) OX=525375 GN=HMPREF0794_1674 PE=4 SV=1	HMPREF0794_1674	35.953	11.3	3	3	3	1.019	1.022	1.158	1.047	0.9	0.855	1.163	0.0776685
C3RY03	Elongation factor tu (Fragment) OS=Staphylococcus epidermidis OX=1282 GN=tuf PE=3 SV=1	tuf	27.403	88	21	1	311
A0A7G9EBL3	Acetyltransferase OS=Staphylococcus epidermidis OX=1282 GN=ATM22_02870 PE=4 SV=1	ATM22_02870	29.153	3.2	1	1	1	1.047	1.005	0.991	0.974	1.014	0.996	0.972	0.169829
A0A0H2VL29	Uncharacterized protein OS=Staphylococcus epidermidis (strain ATCC 12228 / FDA PCI 1200) OX=176280 GN=SE_p402 PE=3 SV=1	SE_p402	76.702	27.7	19	19	22	0.985	0.996	1.019	1.023	1.025	1.002	1.009	0.5757
A0A7I0AKA5	Fructose-bisphosphate aldolase class 1 OS=Staphylococcus epidermidis OX=1282 GN=fda PE=3 SV=1	fda	33.066	92.2	36	1	673	1.037	0.976	0.995	0.976	1.004	1.037	0.957	0.0258293
Q8CPW4	Lipoyl synthase OS=Staphylococcus epidermidis (strain ATCC 12228 / FDA PCI 1200) OX=176280 GN=lipA PE=3 SV=1	lipA	35.028	55.9	17	17	71	1.018	1.001	0.998	0.974	0.999	1.016	0.98	0.129836
A0A7I0AIW1	Cof-type HAD-IIB family hydrolase OS=Staphylococcus epidermidis OX=1282 GN=E1N03_10355 PE=4 SV=1	E1N03_10355	30.233	41.8	10	1	39	0.702	0.859	1.587	1.273	0.768	0.752	1.674	0.0558368
Q8CP95	4-hydroxy-tetrahydrodipicolinate reductase OS=Staphylococcus epidermidis (strain ATCC 12228 / FDA PCI 1200) OX=176280 GN=dapB PE=3 SV=1	dapB	26.709	48.3	10	1	13
A0A7I0ANG2	Sulfite reductase [NADPH] hemoprotein beta-component OS=Staphylococcus epidermidis OX=1282 GN=cysI PE=3 SV=1	cysI	65.354	43.5	18	1	28	0.818	1.108	1.149	1.027	0.947	0.936	1.216	0.026769
Q8CP25	Probable endonuclease 4 OS=Staphylococcus epidermidis (strain ATCC 12228 / FDA PCI 1200) OX=176280 GN=nfo PE=3 SV=1	nfo	33.029	39.5	12	12	36	1.011	1.008	1.021	1.01	0.979	1.004	1.015	0.228266
Q5HKF6	Extracellular cysteine protease OS=Staphylococcus epidermidis (strain ATCC 35984 / RP62A) OX=176279 GN=ecpA PE=3 SV=1	ecpA	44.701	7.6	4	3	4	1.207	0.825	0.82	0.914	1.182	1.129	0.727	0.00138339
A0A0H2VES5	Putative NADH-dependent flavin oxidoreductase OS=Staphylococcus epidermidis (strain ATCC 12228 / FDA PCI 1200) OX=176280 GN=SE_0195 PE=3 SV=1	SE_0195	111.59	53.8	47	47	139	0.998	1.005	1.005	0.978	1.014	1.01	0.989	0.32977
Q8CS58	Thiol peroxidase OS=Staphylococcus epidermidis (strain ATCC 12228 / FDA PCI 1200) OX=176280 GN=tpx PE=3 SV=1	tpx	18.296	63.4	7	7	85	1.018	0.976	0.95	0.988	1.002	1.029	0.956	0.0311502
Q8CTA8	UPF0337 protein SE_0604 OS=Staphylococcus epidermidis (strain ATCC 12228 / FDA PCI 1200) OX=176280 GN=SE_0604 PE=3 SV=1	SE_0604	6.8114	81	14	14	133	0.833	1.147	1.181	1.11	0.842	0.846	1.364	7.41495e-05
Q8CRP6	DEAD-box ATP-dependent RNA helicase CshA OS=Staphylococcus epidermidis (strain ATCC 12228 / FDA PCI 1200) OX=176280 GN=cshA PE=3 SV=1	cshA	57.88	58	22	1	75	1.011	1.046	1.021	0.968	0.97	0.97	1.028	0.358018
A0A7I0AQM9	Alpha-amylase OS=Staphylococcus epidermidis OX=1282 GN=CP553_02820 PE=3 SV=1	CP553_02820	64.311	52.8	27	27	101	1.11	0.904	0.884	0.909	1.116	1.115	0.807	1.60642e-05
Q5HML3	Uncharacterized protein OS=Staphylococcus epidermidis (strain ATCC 35984 / RP62A) OX=176279 GN=SERP1615 PE=4 SV=1	SERP1615	6.4311	18.9	1	1	1	0.58	0.305	0.442	3.818	0.396	0.35	3.443	0.483553
Q5HRX0	Uncharacterized protein OS=Staphylococcus epidermidis (strain ATCC 35984 / RP62A) OX=176279 GN=SERP0071 PE=4 SV=1	SERP0071	35.514	43.2	12	12	23	1.092	0.957	0.964	0.99	1.04	1.008	0.927	0.0417092
Q8CS90	Holliday junction ATP-dependent DNA helicase RuvA OS=Staphylococcus epidermidis (strain ATCC 12228 / FDA PCI 1200) OX=176280 GN=ruvA PE=3 SV=1	ruvA	22.323	43	7	7	14	1.086	1.001	0.898	0.971	1.012	1.058	0.909	0.0672335
A0A7H5C4I0	Mobilization protein OS=Staphylococcus epidermidis OX=1282 GN=F9B71_12505 PE=3 SV=1	F9B71_12505	47.605	9.2	4	4	5	1.004	0.98	1.04	0.988	1.006	1.003	0.998	0.919321
Q5HGH2	Ribosome-recycling factor OS=Staphylococcus aureus (strain COL) OX=93062 GN=frr PE=3 SV=1	frr	20.353	46.2	6	1	39
D4FL29	Alkaline phosphatase family protein OS=Staphylococcus epidermidis M23864:W2(grey) OX=525375 GN=HMPREF0794_1267 PE=3 SV=1	HMPREF0794_1267	53.345	18.2	8	7	11	1.106	0.86	0.865	0.837	1.232	1.212	0.722	0.000752513
A0A509LR38	tRNA-specific adenosine deaminase OS=Staphylococcus epidermidis OX=1282 GN=tadA PE=3 SV=1	tadA	71.212	5.4	4	3	4	1.219	0.831	0.843	0.867	1.059	1.247	0.721	0.00349043
A0A125SJG5	Uncharacterized protein OS=Staphylococcus epidermidis OX=1282 PE=3 SV=1	--	53.086	28.6	12	1	29	1.06	0.989	0.911	0.947	1.04	1.09	0.892	0.0140255
A0A5R1C8C8	Uncharacterized protein OS=Staphylococcus epidermidis OX=1282 GN=CP553_06845 PE=4 SV=1	CP553_06845	12.426	53.4	5	5	11	0.857	1.154	1.12	1.152	0.855	0.832	1.347	2.55935e-05
A0A0H2VIT6	Streptococcal hemagglutinin protein OS=Staphylococcus epidermidis (strain ATCC 12228 / FDA PCI 1200) OX=176280 GN=SE_2249 PE=4 SV=1	SE_2249	294.64	14.4	30	2	109	1.244	0.871	0.76	0.932	1.172	1.141	0.721	0.00712657
Q5HH16	Phosphoribosylformylglycinamidine synthase subunit PurQ OS=Staphylococcus aureus (strain COL) OX=93062 GN=purQ PE=3 SV=1	purQ	24.527	11.7	2	1	2	1.024	0.928	0.99	0.948	1.061	1.084	0.904	0.0163575
A0A7H5C872	Amino acid permease OS=Staphylococcus epidermidis OX=1282 GN=ATM22_05345 PE=4 SV=1	ATM22_05345	50.023	11.1	4	4	4	1.088	0.974	0.947	0.98	1.058	0.992	0.924	0.0565332
D2JCS4	FtsK/SpoIIIE family protein OS=Staphylococcus epidermidis OX=1282 GN=SAP110B_009 PE=4 SV=1	SAP110B_009	40.895	2	1	1	1
Q8CRG6	30S ribosomal protein S3 OS=Staphylococcus epidermidis (strain ATCC 12228 / FDA PCI 1200) OX=176280 GN=rpsC PE=3 SV=1	rpsC	24.188	53	14	14	76	0.95	1.043	1.051	1.01	0.913	0.932	1.111	0.0033154
Q5HNK3	Malate dehydrogenase (oxaloacetate-decarboxylating) OS=Staphylococcus epidermidis (strain ATCC 35984 / RP62A) OX=176279 GN=SERP1265 PE=3 SV=1	SERP1265	44.23	66.3	23	23	61	1.048	0.967	0.948	0.962	1.021	1.072	0.916	0.00458446
A0A7H5C829	NAD(P)/FAD-dependent oxidoreductase OS=Staphylococcus epidermidis OX=1282 GN=F9B71_00470 PE=4 SV=1	F9B71_00470	46.518	19.3	7	1	10
A0A7G9EDT2	Secretion protein OS=Staphylococcus epidermidis OX=1282 GN=ATM22_07055 PE=4 SV=1	ATM22_07055	36.775	9.6	3	1	3
A0A5E9M503	GHKL domain-containing protein OS=Staphylococcus epidermidis OX=1282 GN=E1M98_01775 PE=4 SV=1	E1M98_01775	30.165	25.4	6	6	7	0.904	1.057	1.081	1.012	0.952	0.986	1.108	0.0315367
D4FLK6	Serine protease OS=Staphylococcus epidermidis M23864:W2(grey) OX=525375 GN=HMPREF0794_1444 PE=3 SV=1	HMPREF0794_1444	71.857	17.7	10	5	12	1.164	0.83	0.916	0.784	1.184	1.194	0.714	0.00182628
A0A7U0J830	dUTP diphosphatase OS=Staphylococcus virus vB_SepS_27 OX=2797317 PE=4 SV=1	--	20.486	12.6	1	1	1	1.097	0.963	0.834	0.971	1.14	1.05	0.842	0.0338668
Q8CPK7	Phospho-N-acetylmuramoyl-pentapeptide-transferase OS=Staphylococcus epidermidis (strain ATCC 12228 / FDA PCI 1200) OX=176280 GN=mraY PE=3 SV=1	mraY	35.602	2.8	1	1	4	0.935	1.021	1.048	0.964	1.074	0.996	1.009	0.837806
Q8CQU6	Putative 4-diphosphocytidyl-2-C-methyl-D-erythritol kinase OS=Staphylococcus epidermidis (strain ATCC 12228 / FDA PCI 1200) OX=176280 GN=SE_2288 PE=3 SV=1	SE_2288	31.03	23	4	4	6	1.042	0.916	0.917	1.019	1.094	1.054	0.894	0.0418237
Q5HQ73	Dihydrolipoyl dehydrogenase OS=Staphylococcus epidermidis (strain ATCC 35984 / RP62A) OX=176279 GN=pdhD PE=3 SV=1	pdhD	49.695	73.5	28	28	246	1.022	0.98	0.983	0.985	1.021	1.01	0.966	0.000999961
A0A7I0AWF9	Putative phosphoesterase E1N00_00820 OS=Staphylococcus epidermidis OX=1282 GN=CP553_05530 PE=3 SV=1	CP553_05530	61.7	31.5	16	1	35	1.148	0.917	0.835	1.029	1.09	1.037	0.849	0.0685115
A0A4Q9W4C9	Spermidine/putrescine ABC transporter substrate-binding protein OS=Staphylococcus epidermidis OX=1282 GN=CP553_05960 PE=3 SV=1	CP553_05960	77.825	15.1	8	2	9	0.964	1.011	0.963	1.06	0.963	1.05	1.019	0.65803
A0A7I0AX46	Uncharacterized protein (Fragment) OS=Staphylococcus epidermidis OX=1282 GN=E1M98_12785 PE=4 SV=1	E1M98_12785	7.6706	83.1	5	5	15	1.02	1.012	0.973	1.008	1.011	0.991	0.99	0.555272
A0A0H2VKG6	Mobilization protein OS=Staphylococcus epidermidis (strain ATCC 12228 / FDA PCI 1200) OX=176280 GN=SE_p603 PE=4 SV=1	SE_p603	14.602	64.8	7	2	24	1.049	0.98	0.973	0.997	1	1.029	0.958	0.0539562
Q8CND1	Urease subunit gamma OS=Staphylococcus epidermidis (strain ATCC 12228 / FDA PCI 1200) OX=176280 GN=ureA PE=3 SV=2	ureA	11.152	68	4	4	19	1.168	0.86	0.844	0.803	1.202	1.146	0.713	0.000164738
Q8CMQ8	GMP synthase [glutamine-hydrolyzing] OS=Staphylococcus epidermidis (strain ATCC 12228 / FDA PCI 1200) OX=176280 GN=guaA PE=3 SV=1	guaA	58.185	57.1	23	23	78	1.023	0.99	0.97	1.018	1.003	0.992	0.987	0.464083
Q9FD74	Mevalonate kinase OS=Staphylococcus epidermidis OX=1282 GN=mvaK1 PE=3 SV=1	mvaK1	33.185	52.9	11	3	23	0.982	1.007	1.01	1.024	1	0.956	1.035	0.0694901
A0A509M030	tRNA (Adenine-N(1))-methyltransferase OS=Staphylococcus epidermidis OX=1282 GN=D9V05_01570 PE=4 SV=1	D9V05_01570	26.129	42.4	8	3	17	0.949	0.996	0.954	1.045	0.925	1.04	1.028	0.561183
A0A0E1VBX1	Uncharacterized protein OS=Staphylococcus epidermidis W23144 OX=525376 GN=HMPREF0791_1594 PE=3 SV=1	HMPREF0791_1594	44.456	10.6	4	1	5	0.83	1.152	1.309	0.922	0.85	0.906	1.308	0.0703755
A0A7H5C9M8	Glyoxalase OS=Staphylococcus epidermidis OX=1282 GN=ATM22_07970 PE=4 SV=1	ATM22_07970	98.15	37.6	30	2	300	1.037	1.004	1.008	0.957	1.013	1.008	0.971	0.189583
A0A7G9EDQ7	Prephenate dehydrogenase OS=Staphylococcus epidermidis OX=1282 GN=ATM22_06930 PE=3 SV=1	ATM22_06930	40.71	5	1	1	1	0.649	1.243	1.472	1.04	0.688	0.827	1.735	0.0116455
Q5HLE0	Polyphosphate kinase OS=Staphylococcus epidermidis (strain ATCC 35984 / RP62A) OX=176279 GN=ppk PE=3 SV=1	ppk	83.565	30.4	21	21	37	0.997	0.997	0.978	0.978	1.023	1.016	0.973	0.0505903
A0A7T9WUI7	Transcription-repair coupling factor OS=Staphylococcus epidermidis OX=1282 GN=mfd PE=4 SV=1	mfd	134.42	36.3	34	1	59	1.104	0.914	0.748	0.868	1.328	1.122	0.712	0.0156854
Q8CPQ5	2-succinyl-5-enolpyruvyl-6-hydroxy-3-cyclohexene-1-carboxylate synthase OS=Staphylococcus epidermidis (strain ATCC 12228 / FDA PCI 1200) OX=176280 GN=menD PE=3 SV=2	menD	62.864	30.8	14	2	29	1.033	1.047	0.993	0.896	0.99	0.971	0.981	0.687624
D4FKF4	PTS system sucrose-specific IIBC component OS=Staphylococcus epidermidis M23864:W2(grey) OX=525375 GN=scrA PE=4 SV=1	scrA	95.622	15.4	10	2	26	0.942	1.098	1.054	0.992	0.891	0.994	1.112	0.0694925
W5R9B9	Uncharacterized protein OS=Staphylococcus phage phiIBB-SEP1 OX=1340769 GN=SEP1_027 PE=4 SV=1	SEP1_027	20.175	4.7	1	1	3	0.929	1.121	1.022	1.054	1.01	0.869	1.139	0.063169
D4FLX5	Ribosome-binding ATPase YchF OS=Staphylococcus epidermidis M23864:W2(grey) OX=525375 GN=ychF PE=3 SV=1	ychF	84.014	45.5	28	11	107	1.004	0.983	0.978	1.005	1.03	1.01	0.974	0.0846112
Q8CT15	DNA-directed RNA polymerase subunit epsilon OS=Staphylococcus epidermidis (strain ATCC 12228 / FDA PCI 1200) OX=176280 GN=rpoY PE=3 SV=1	rpoY	8.7346	86.1	6	6	30	1.014	1.02	0.993	0.954	1.021	1.005	0.976	0.284363
Q8CS60	Acetate kinase OS=Staphylococcus epidermidis (strain ATCC 12228 / FDA PCI 1200) OX=176280 GN=ackA PE=3 SV=1	ackA	46.337	55.4	18	18	69	1.027	0.999	1.005	0.983	1.023	1.026	0.971	0.011876
A0A7G9EFF2	Aldehyde-alcohol dehydrogenase OS=Staphylococcus epidermidis OX=1282 GN=ATM22_09975 PE=3 SV=1	ATM22_09975	95.605	55.2	41	1	282	1.227	0.782	0.814	0.936	1.235	1.093	0.712	0.0071974
Q5HRJ0	Deoxynucleoside kinase family protein OS=Staphylococcus epidermidis (strain ATCC 35984 / RP62A) OX=176279 GN=SERP0203 PE=3 SV=1	SERP0203	24.147	40	8	8	13	0.966	1.018	0.949	1.12	1.001	0.952	1.058	0.344279
Q5HFK7	Superoxide dismutase [Mn/Fe] 1 OS=Staphylococcus aureus (strain COL) OX=93062 GN=sodA PE=3 SV=1	sodA	22.711	43.7	5	1	32	1.123	0.908	0.853	0.976	1.083	1.053	0.84	0.0151898
Q5HQ77	Uncharacterized protein OS=Staphylococcus epidermidis (strain ATCC 35984 / RP62A) OX=176279 GN=SERP0679 PE=4 SV=1	SERP0679	24.252	51.4	17	1	59	0.702	1.179	1.462	1.235	0.57	0.764	1.904	0.00402075
Q5HNG8	FtsK/SpoIIIE family protein OS=Staphylococcus epidermidis (strain ATCC 35984 / RP62A) OX=176279 GN=SERP1301 PE=3 SV=1	SERP1301	133.55	55.3	54	45	131	1.01	0.989	0.983	1.014	1.012	1.003	0.987	0.256675
Q8CP37	Transcription antitermination protein NusB OS=Staphylococcus epidermidis (strain ATCC 12228 / FDA PCI 1200) OX=176280 GN=nusB PE=3 SV=1	nusB	15.15	57.4	8	8	24	0.959	1.054	1.036	0.989	1.009	0.956	1.053	0.116412
A0A7T9WSP2	6-phospho-3-hexuloisomerase OS=Staphylococcus epidermidis OX=1282 GN=hxlB PE=4 SV=1	hxlB	19.855	37.9	5	5	13	1.087	1.012	0.868	1.072	1.082	1.045	0.918	0.238945
A0A7I0APH0	LysR family transcriptional regulator OS=Staphylococcus epidermidis OX=1282 GN=E1N00_11925 PE=4 SV=1	E1N00_11925	13.536	11	1	1	1	1.201	0.848	0.701	0.977	1.231	1.127	0.71	0.0243749
Q5HMD5	HMA domain-containing protein OS=Staphylococcus epidermidis (strain ATCC 35984 / RP62A) OX=176279 GN=SERP1693 PE=4 SV=1	SERP1693	7.9871	56.5	3	3	13	1.005	0.946	1.062	1.034	1	0.969	1.023	0.589803
G9D9Z9	Putative mobile element-associated protein OS=Staphylococcus epidermidis OX=1282 GN=ri17 PE=4 SV=1	ri17	47.727	11.4	5	1	12	1.468	0.78	0.592	0.969	1.235	0.97	0.637	0.0706906
A0A0H2VHZ9	Glycerate kinase OS=Staphylococcus epidermidis (strain ATCC 12228 / FDA PCI 1200) OX=176280 GN=SE_1999 PE=3 SV=1	SE_1999	41.365	60.8	15	2	40	0.997	1.012	1.04	0.993	0.954	1.025	1.023	0.403632
A0A0E1V996	50S ribosomal protein L4 OS=Staphylococcus epidermidis W23144 OX=525376 GN=rplD PE=3 SV=1	rplD	94.898	14.2	8	7	77	0.959	1.053	1.043	1.058	0.944	0.945	1.107	0.00010186
A0A2T4LH55	Excinuclease ABC subunit B OS=Staphylococcus epidermidis OX=1282 GN=CP553_08195 PE=4 SV=1	CP553_08195	21.332	42.8	8	8	16	0.99	1.076	1.115	1.035	0.88	0.945	1.146	0.0275936
Q8CT08	UPF0637 protein SE_0804 OS=Staphylococcus epidermidis (strain ATCC 12228 / FDA PCI 1200) OX=176280 GN=SE_0804 PE=3 SV=1	SE_0804	24.103	52.7	12	2	39	1.11	0.929	0.955	0.982	1.063	1.02	0.898	0.0210395
A0A7I0ALK8	Phosphoglycerate kinase OS=Staphylococcus epidermidis OX=1282 GN=pgk PE=3 SV=1	pgk	85.077	39	32	21	397	1.004	0.997	0.994	0.996	1.003	1.01	0.99	0.0130569
A0A0E1VD11	Biotin carboxylase OS=Staphylococcus epidermidis W23144 OX=525376 GN=accC PE=4 SV=1	accC	132.92	35.3	34	19	83	0.968	1.02	1.017	1.014	0.978	0.979	1.043	0.000452841
A0A0H2VJ91	ATP-binding protein OS=Staphylococcus epidermidis (strain ATCC 12228 / FDA PCI 1200) OX=176280 GN=SE_p511 PE=4 SV=1	SE_p511	31.773	46.5	11	11	18	0.978	1.001	1.063	0.963	1.022	1.054	0.991	0.810245
Q8VQ15	Superoxide dismutase [Mn/Fe] OS=Staphylococcus epidermidis OX=1282 GN=sodA PE=1 SV=1	sodA	22.706	38.7	8	1	32	0.845	1.13	1.2	0.973	0.925	0.91	1.232	0.0392943
Q8CNQ7	Peroxide-responsive repressor PerR OS=Staphylococcus epidermidis (strain ATCC 12228 / FDA PCI 1200) OX=176280 GN=perR PE=3 SV=1	perR	17.28	21.3	3	3	9	1.098	0.934	0.857	0.995	1.088	1.084	0.852	0.020289
Q8CP59	Probable elastin-binding protein EbpS OS=Staphylococcus epidermidis (strain ATCC 12228 / FDA PCI 1200) OX=176280 GN=ebpS PE=4 SV=2	ebpS	50.685	50	24	24	158	0.966	1.003	1.052	0.98	0.975	0.995	1.034	0.220677
Q8CSZ2	50S ribosomal protein L32 OS=Staphylococcus epidermidis (strain ATCC 12228 / FDA PCI 1200) OX=176280 GN=rpmF PE=3 SV=1	rpmF	6.5285	50.9	2	2	68	0.971	1.048	1.019	0.944	0.958	1.029	1.018	0.674248
Q5HNI7	GAF domain protein OS=Staphylococcus epidermidis (strain ATCC 35984 / RP62A) OX=176279 GN=SERP1282 PE=4 SV=1	SERP1282	17.097	49.4	6	6	14	1.004	1.026	1.045	0.932	0.989	0.987	1.008	0.865668
Q8CQQ9	UPF0355 protein SE_2351 OS=Staphylococcus epidermidis (strain ATCC 12228 / FDA PCI 1200) OX=176280 GN=SE_2351 PE=3 SV=1	SE_2351	15.128	73.3	10	10	116	1.014	1.001	1.014	0.985	1.009	1	0.992	0.455947
A0A2G7HYD9	Serine protease HtrA-like OS=Staphylococcus epidermidis OX=1282 GN=ATM22_05190 PE=3 SV=1	ATM22_05190	44.073	67	24	2	103	1.27	0.84	0.624	1.018	1.242	1.1	0.687	0.0579274
Q8CRI5	50S ribosomal protein L17 OS=Staphylococcus epidermidis (strain ATCC 12228 / FDA PCI 1200) OX=176280 GN=rplQ PE=3 SV=1	rplQ	13.662	45.9	6	6	33	0.918	1.061	1.102	1.03	0.924	0.952	1.143	0.00409608
Q5HQ84	Glutaredoxin domain-containing protein OS=Staphylococcus epidermidis (strain ATCC 35984 / RP62A) OX=176279 GN=SERP0671 PE=4 SV=1	SERP0671	9.2066	50	3	3	6	0.968	0.958	0.951	1.11	1.06	0.98	1.004	0.975501
Q8VSV7	PP2C family protein-serine/threonine phosphatase OS=Staphylococcus epidermidis OX=1282 GN=rsbU PE=4 SV=1	rsbU	38.03	49.2	14	14	25	1.034	0.95	0.954	0.949	1.052	1.056	0.908	0.000133318
A0A7T9WUH0	Radical SAM/CxCxxxxC motif protein YfkAB OS=Staphylococcus epidermidis OX=1282 GN=yfkAB PE=4 SV=1	yfkAB	43.8	17.2	7	1	9
D4FHH8	DEAD-box ATP-dependent RNA helicase CshA OS=Staphylococcus epidermidis M23864:W2(grey) OX=525375 GN=deaD PE=3 SV=1	deaD	95.723	41.3	30	1	102
Q8CSA5	tRNA-specific 2-thiouridylase MnmA OS=Staphylococcus epidermidis (strain ATCC 12228 / FDA PCI 1200) OX=176280 GN=mnmA PE=3 SV=1	mnmA	42.299	45.2	15	15	28	1.005	0.993	1.016	1.066	0.974	0.961	1.046	0.145732
Q8CTT5	50S ribosomal protein L11 OS=Staphylococcus epidermidis (strain ATCC 12228 / FDA PCI 1200) OX=176280 GN=rplK PE=3 SV=1	rplK	14.917	23.6	3	3	10	1.014	0.986	0.978	1.124	1.026	0.974	1.025	0.662885
A0A0E1VEE2	Uncharacterized protein OS=Staphylococcus epidermidis W23144 OX=525376 GN=HMPREF0791_0595 PE=3 SV=1	HMPREF0791_0595	168.93	16.9	20	3	79	0.967	0.985	1.027	0.945	1.008	1.089	0.965	0.455613
D4FJ33	50S ribosomal protein L33 OS=Staphylococcus epidermidis M23864:W2(grey) OX=525375 GN=rpmG PE=3 SV=1	rpmG	50.969	6	2	1	8	1.018	1.08	0.984	0.98	0.926	0.986	1.039	0.419657
Q5HPP7	Uncharacterized protein OS=Staphylococcus epidermidis (strain ATCC 35984 / RP62A) OX=176279 GN=SERP0861 PE=4 SV=1	SERP0861	14.459	34.7	4	4	5	0.935	1.082	1.058	0.996	0.965	0.954	1.099	0.0238032
A0A7I0ALS4	Ribulokinase OS=Staphylococcus epidermidis OX=1282 GN=araB PE=3 SV=1	araB	59.959	26.5	9	1	16	1.303	1.012	0.813	0.836	1.117	0.991	0.78	0.078314
A0A0H2WY85	DNA polymerase III subunit gamma/tau OS=Staphylococcus aureus (strain COL) OX=93062 GN=dnaX PE=3 SV=1	dnaX	63.498	9.4	5	2	5	1.254	0.828	0.728	0.968	1.207	1.102	0.708	0.0182507
Q8CNK1	Aminopyrimidine aminohydrolase OS=Staphylococcus epidermidis (strain ATCC 12228 / FDA PCI 1200) OX=176280 GN=tenA PE=1 SV=1	tenA	26.899	31.4	6	2	9	1.073	0.937	0.942	1.043	0.992	1.02	0.947	0.258323
Q8CT93	D-alanine--D-alanyl carrier protein ligase OS=Staphylococcus epidermidis (strain ATCC 12228 / FDA PCI 1200) OX=176280 GN=dltA PE=3 SV=1	dltA	54.795	53.4	19	19	81	1.024	0.979	0.962	0.959	1.039	1.031	0.937	0.00107932
A0A7M3F6D5	Accumulation-associated protein (Fragment) OS=Staphylococcus epidermidis OX=1282 GN=E1N11_12615 PE=4 SV=1	E1N11_12615	56.022	78.4	43	1	262	1.096	0.959	0.881	0.906	1.124	1.088	0.83	0.00224153
A0A7H5CAV2	Inositol monophosphatase family protein OS=Staphylococcus epidermidis OX=1282 GN=F9B71_03625 PE=4 SV=1	F9B71_03625	30.668	42.5	12	1	39	1.193	0.85	0.744	0.916	1.169	1.207	0.703	0.00445482
A0A0E1VGV1	Teichoic acids export ATP-binding protein TagH OS=Staphylococcus epidermidis W23144 OX=525376 GN=tagH PE=3 SV=1	tagH	59.201	23.6	11	7	24	1.064	0.969	0.905	1.016	1.076	1.038	0.909	0.0526642
Q5HGU5	Phenylalanine--tRNA ligase beta subunit OS=Staphylococcus aureus (strain COL) OX=93062 GN=pheT PE=3 SV=1	pheT	88.92	4.4	3	1	11	0.709	1.097	1.407	0.995	0.758	0.92	1.466	0.0432538
D4FID5	DNA polymerase I OS=Staphylococcus epidermidis M23864:W2(grey) OX=525375 GN=polA PE=3 SV=1	polA	99.712	62.8	42	30	114	1.022	1.001	0.984	0.988	0.989	1.028	0.978	0.170771
A0A7I0AZ24	Heme chaperone HemW OS=Staphylococcus epidermidis OX=1282 GN=E1M98_07640 PE=3 SV=1	E1M98_07640	43.38	17.1	5	5	5	1.003	1.019	1.007	1.022	0.968	1.062	1.005	0.846698
A0A0H2X1K2	Uncharacterized protein OS=Staphylococcus aureus (strain COL) OX=93062 GN=SACOL0463 PE=4 SV=1	SACOL0463	118.48	4	4	1	8	0.975	1.031	1	1.045	0.984	0.977	1.048	0.0252042
A0A7G9EEQ6	BppU_N domain-containing protein OS=Staphylococcus epidermidis OX=1282 GN=ATM22_08700 PE=4 SV=1	ATM22_08700	45.028	6.3	2	2	2
Q8CTT6	50S ribosomal protein L33 3 OS=Staphylococcus epidermidis (strain ATCC 12228 / FDA PCI 1200) OX=176280 GN=rpmG3 PE=3 SV=1	rpmG3	5.3902	42.6	3	3	5	0.973	1.034	1.082	0.805	0.937	1.032	0.993	0.886855
Q5HLP3	Uncharacterized protein OS=Staphylococcus epidermidis (strain ATCC 35984 / RP62A) OX=176279 GN=SERP1942 PE=4 SV=1	SERP1942	24.274	10	2	2	2	0.954	0.996	1.149	1.149	0.841	0.898	1.223	0.0287013
Q5HN01	Uncharacterized protein OS=Staphylococcus epidermidis (strain ATCC 35984 / RP62A) OX=176279 GN=SERP1474 PE=4 SV=1	SERP1474	111.1	25.3	22	3	40	1.294	0.812	0.68	1.011	1.198	1.098	0.697	0.0401833
D4FJC9	Uncharacterized protein OS=Staphylococcus epidermidis M23864:W2(grey) OX=525375 GN=HMPREF0794_0667 PE=4 SV=1	HMPREF0794_0667	23.943	27.1	4	4	7	1.106	0.879	0.886	0.924	1.09	1.089	0.819	0.000250319
Q8CRJ7	Zinc-type alcohol dehydrogenase-like protein SE_1777 OS=Staphylococcus epidermidis (strain ATCC 12228 / FDA PCI 1200) OX=176280 GN=SE_1777 PE=3 SV=1	SE_1777	37.61	39.6	8	3	16	1.205	0.849	0.707	1.11	1.1	1.096	0.784	0.125765
Q5HNP0	Folylpolyglutamate synthase/dihydrofolate synthase OS=Staphylococcus epidermidis (strain ATCC 35984 / RP62A) OX=176279 GN=folC PE=3 SV=1	folC	47.866	39.9	14	14	28	0.968	1.001	1.037	1.01	0.924	1.003	1.053	0.116504
A0A7G9EE02	GTPase HflX OS=Staphylococcus epidermidis OX=1282 GN=hflX PE=3 SV=1	hflX	47.395	38	11	1	20
Q8CNG6	Probable uridylyltransferase SE_1761 OS=Staphylococcus epidermidis (strain ATCC 12228 / FDA PCI 1200) OX=176280 GN=SE_1761 PE=3 SV=1	SE_1761	45.733	65.3	24	3	90	0.973	1.032	1.019	0.976	0.983	0.988	1.028	0.190164
Q7ZAJ2	Tyrosine recombinase XerD OS=Staphylococcus epidermidis (strain ATCC 12228 / FDA PCI 1200) OX=176280 GN=xerD PE=3 SV=1	xerD	34.104	21.4	6	6	10	0.981	1.011	1.02	1.039	1.005	0.992	1.031	0.0462085
Q5HRA9	Putative antiporter subunit mnhD2 OS=Staphylococcus epidermidis (strain ATCC 35984 / RP62A) OX=176279 GN=mnhD2 PE=3 SV=1	mnhD2	55.079	1.4	1	1	1
A0A5R1C116	Uncharacterized protein (Fragment) OS=Staphylococcus epidermidis OX=1282 GN=E1N04_12145 PE=4 SV=1	E1N04_12145	118.21	1.2	1	1	1
A0A7T9WTQ6	Alpha/beta hydrolase OS=Staphylococcus epidermidis OX=1282 GN=I6I40_03640 PE=4 SV=1	I6I40_03640	33.069	29.9	6	6	10	1.152	0.965	0.842	0.966	1.05	1.096	0.841	0.0298662
Q5HET0	UPF0342 protein SACOL1902 OS=Staphylococcus aureus (strain COL) OX=93062 GN=SACOL1902 PE=3 SV=1	SACOL1902	13.31	68.4	8	2	82	0.902	0.995	1.087	1.151	0.947	0.915	1.17	0.0256676
Q8CS54	30S ribosomal protein S4 OS=Staphylococcus epidermidis (strain ATCC 12228 / FDA PCI 1200) OX=176280 GN=rpsD PE=3 SV=1	rpsD	23.105	63	12	2	88	0.996	1.062	1.035	1.045	0.954	0.958	1.08	0.0077228
Q5HPI4	Amino acid carrier protein OS=Staphylococcus epidermidis (strain ATCC 35984 / RP62A) OX=176279 GN=SERP0927 PE=3 SV=1	SERP0927	52.057	6.2	3	3	5	0.974	1.064	1.041	1.016	0.967	0.993	1.064	0.0164431
A0A509LP24	DUF1643 domain-containing protein OS=Staphylococcus epidermidis OX=1282 GN=D9V05_12545 PE=4 SV=1	D9V05_12545	19.546	11.3	1	1	1	0.898	1.068	1.061	0.968	0.943	1.061	1.067	0.321214
Q8CPZ0	UvrABC system protein B OS=Staphylococcus epidermidis (strain ATCC 12228 / FDA PCI 1200) OX=176280 GN=uvrB PE=3 SV=1	uvrB	76.767	55.2	38	38	68	0.994	1.022	1	1.002	0.988	1.002	1.013	0.174335
Q8CRT6	Adenylosuccinate lyase OS=Staphylococcus epidermidis (strain ATCC 12228 / FDA PCI 1200) OX=176280 GN=purB PE=3 SV=1	purB	49.591	53.1	19	19	63	1.032	0.977	0.976	0.97	1.029	1.047	0.94	0.000456076
A0A0E1VD58	Transcription termination/antitermination protein NusA OS=Staphylococcus epidermidis W23144 OX=525376 GN=nusA PE=3 SV=1	nusA	130.53	23.1	26	14	135	0.961	1.019	1.039	1.014	0.992	0.972	1.05	0.0145613
Q5HNG3	PepSY domain-containing protein OS=Staphylococcus epidermidis (strain ATCC 35984 / RP62A) OX=176279 GN=SERP1306 PE=4 SV=1	SERP1306	61.547	15.1	9	9	16	1.08	0.938	0.925	1.044	1.023	1.008	0.934	0.189432
A0A3G1RLZ5	Accumulation-associated protein OS=Staphylococcus epidermidis OX=1282 PE=4 SV=1	--	131.48	40.9	36	1	181	1.238	0.795	0.675	1.005	1.352	1.041	0.682	0.0479059
Q8CNS1	Coproporphyrin III ferrochelatase OS=Staphylococcus epidermidis (strain ATCC 12228 / FDA PCI 1200) OX=176280 GN=cpfC PE=3 SV=1	cpfC	35.428	62.2	15	15	40	0.987	1.012	1.042	1.012	0.964	0.976	1.047	0.0175345
D4FIC3	DHHA1 domain protein OS=Staphylococcus epidermidis M23864:W2(grey) OX=525375 GN=HMPREF0794_0311 PE=4 SV=1	HMPREF0794_0311	35.568	55.4	14	14	54	1.009	0.98	1.007	0.958	1.029	1.013	0.965	0.085206
D4FK03	Uncharacterized protein OS=Staphylococcus epidermidis M23864:W2(grey) OX=525375 GN=HMPREF0794_0891 PE=4 SV=1	HMPREF0794_0891	93.221	36.3	34	17	113	1.153	0.912	0.875	0.85	1.122	1.114	0.778	0.000396524
A0A4Q9W7N3	Cell division protein FtsL OS=Staphylococcus epidermidis OX=1282 GN=ftsL PE=3 SV=1	ftsL	15.248	39.1	6	4	20	0.995	1.037	1.011	1.038	0.986	0.948	1.054	0.0380721
Q8CNF4	NAD-dependent protein deacetylase OS=Staphylococcus epidermidis (strain ATCC 12228 / FDA PCI 1200) OX=176280 GN=cobB PE=3 SV=1	cobB	27.695	21.5	4	4	5	0.94	1.031	0.866	0.978	1.152	0.967	0.94	0.500849
Q5HRP7	General stress protein 13 OS=Staphylococcus epidermidis (strain ATCC 35984 / RP62A) OX=176279 GN=SERP0146 PE=4 SV=1	SERP0146	14.782	27.8	5	5	12	0.945	1.041	1.032	1	0.988	0.989	1.052	0.0594918
Q5HP73	Uncharacterized protein OS=Staphylococcus epidermidis (strain ATCC 35984 / RP62A) OX=176279 GN=SERP1040 PE=4 SV=1	SERP1040	21.933	31.8	7	7	11	1.023	1.049	1.046	0.951	0.956	1.014	1.018	0.682879
Q8CQF4	Arsenical pump membrane protein OS=Staphylococcus epidermidis (strain ATCC 12228 / FDA PCI 1200) OX=176280 GN=arsB PE=3 SV=1	arsB	46.838	3.7	1	1	1
Q8CT84	Putative peptidyl-prolyl cis-trans isomerase OS=Staphylococcus epidermidis (strain ATCC 12228 / FDA PCI 1200) OX=176280 GN=SE_0648 PE=3 SV=1	SE_0648	21.726	61.4	10	8	80	1.019	0.961	0.882	0.996	1.011	1.024	0.93	0.109868
Q5HQJ6	Signal peptidase I OS=Staphylococcus epidermidis (strain ATCC 35984 / RP62A) OX=176279 GN=spsB PE=3 SV=1	spsB	21.513	66.5	18	17	63	0.981	1.022	1.018	1.011	0.985	1.002	1.028	0.0186979
Q8CNL9	tRNA N6-adenosine threonylcarbamoyltransferase OS=Staphylococcus epidermidis (strain ATCC 12228 / FDA PCI 1200) OX=176280 GN=tsaD PE=3 SV=1	tsaD	36.774	50.9	12	5	20	0.895	1.033	1.019	0.94	0.964	1.026	1.037	0.493025
A0A7G9EEN1	Bifunctional autolysin OS=Staphylococcus epidermidis OX=1282 GN=ATM22_08570 PE=3 SV=1	ATM22_08570	148.15	52.7	54	1	280	1.206	0.847	0.85	0.769	1.246	1.169	0.681	0.000514675
A0A0H2VIQ1	Recombinase OS=Staphylococcus epidermidis (strain ATCC 12228 / FDA PCI 1200) OX=176280 GN=SE_p303 PE=4 SV=1	SE_p303	24.243	56.5	9	9	13	1.009	0.968	0.989	1.013	0.996	1.01	0.985	0.33505
A0A0H2VHA3	Uncharacterized protein OS=Staphylococcus epidermidis (strain ATCC 12228 / FDA PCI 1200) OX=176280 GN=SE_0370 PE=4 SV=1	SE_0370	19.311	67.9	8	2	28	1.007	0.945	0.988	1.053	0.996	0.988	0.998	0.938186
A0A7I0BY48	NAD(P)/FAD-dependent oxidoreductase OS=Staphylococcus epidermidis OX=1282 GN=E1M98_01455 PE=3 SV=1	E1M98_01455	49.91	40.5	17	1	48	0.801	1.185	1.39	0.973	0.741	0.858	1.478	0.0266039
Q8CMP4	Serine-aspartate repeat-containing protein F OS=Staphylococcus epidermidis (strain ATCC 12228 / FDA PCI 1200) OX=176280 GN=sdrF PE=3 SV=1	sdrF	174.77	32.1	42	42	91	1.049	0.943	0.959	0.992	1.049	1.044	0.921	0.00531709
Q8CNW5	Septation ring formation regulator EzrA OS=Staphylococcus epidermidis (strain ATCC 12228 / FDA PCI 1200) OX=176280 GN=ezrA PE=3 SV=1	ezrA	66.525	65.2	38	27	114	1.03	0.992	0.971	0.957	1.013	1.038	0.948	0.0132626
Q8CRM9	Thymidine kinase OS=Staphylococcus epidermidis (strain ATCC 12228 / FDA PCI 1200) OX=176280 GN=tdk PE=3 SV=1	tdk	22.466	46.7	8	8	18	0.99	0.998	1.048	1.018	0.986	1	1.03	0.122054
A0A2G7HX24	S-formylglutathione hydrolase OS=Staphylococcus epidermidis OX=1282 GN=D9V05_06095 PE=3 SV=1	D9V05_06095	29.009	36.1	7	1	16	0.994	0.828	1.346	1.208	0.742	0.861	1.302	0.214094
Q5HLB5	Thiamine biosynthesis protein ThiS OS=Staphylococcus epidermidis (strain ATCC 35984 / RP62A) OX=176279 GN=thiS PE=4 SV=1	thiS	7.7217	21.2	1	1	1	0.911	0.991	1.111	1.009	0.961	1.019	1.076	0.202498
A0A7I0AZE9	DUF4870 domain-containing protein OS=Staphylococcus epidermidis OX=1282 GN=E1M98_07030 PE=4 SV=1	E1M98_07030	18.633	10.4	2	2	5	0.828	0.935	1.092	1.396	0.826	0.898	1.341	0.0792815
Q8CU07	Probable tRNA-dihydrouridine synthase OS=Staphylococcus epidermidis (strain ATCC 12228 / FDA PCI 1200) OX=176280 GN=dus PE=3 SV=1	dus	37.357	47.5	12	12	23	0.947	1.084	1.069	1.031	0.967	0.944	1.114	0.00298571
Q5HQJ7	Signal peptidase I OS=Staphylococcus epidermidis (strain ATCC 35984 / RP62A) OX=176279 GN=spsA PE=3 SV=1	spsA	20.068	32.4	5	5	5	1.01	1.039	0.991	1.035	0.998	0.947	1.037	0.214787
Q8CQK1	Adenylosuccinate synthetase OS=Staphylococcus epidermidis (strain ATCC 12228 / FDA PCI 1200) OX=176280 GN=purA PE=3 SV=1	purA	47.414	60.9	22	22	66	1.002	0.969	0.986	0.976	1.025	1.034	0.958	0.0151885
A0A2G7I0D7	Low specificity L-threonine aldolase OS=Staphylococcus epidermidis OX=1282 GN=CP553_01570 PE=4 SV=1	CP553_01570	38.687	48.1	11	1	26
A0A7I0AMK7	Isoprenyl transferase OS=Staphylococcus epidermidis OX=1282 GN=E1N03_03170 PE=3 SV=1	E1N03_03170	29.799	16	5	1	7
Q8CT30	Amidophosphoribosyltransferase OS=Staphylococcus epidermidis (strain ATCC 12228 / FDA PCI 1200) OX=176280 GN=purF PE=3 SV=1	purF	54.43	14.6	6	6	9	1.002	0.989	1.031	0.973	1.038	1.027	0.976	0.289156
Q5HJY7	Serine--tRNA ligase OS=Staphylococcus aureus (strain COL) OX=93062 GN=serS PE=3 SV=1	serS	48.639	21.5	8	1	48	1.226	0.829	0.854	0.781	1.217	1.178	0.68	0.000185039
A0A0H2VGP8	Uncharacterized protein OS=Staphylococcus epidermidis (strain ATCC 12228 / FDA PCI 1200) OX=176280 GN=SE_1273 PE=4 SV=1	SE_1273	38.04	39.5	9	9	20	1.126	0.934	0.82	1.041	1.006	1.088	0.868	0.131021
A0A0H2WX63	Acyl-coenzyme A:6-aminopenicillanic acid acyl-transferase OS=Staphylococcus aureus (strain COL) OX=93062 GN=SACOL1988 PE=4 SV=1	SACOL1988	159.51	5	6	1	16	0.777	1.2	1.34	1.286	0.642	0.682	1.821	0.000751962
D4FK16	N5-carboxyaminoimidazole ribonucleotide synthase OS=Staphylococcus epidermidis M23864:W2(grey) OX=525375 GN=purK PE=3 SV=1	purK	85.084	26.2	17	2	40	1.098	0.975	0.973	1.023	1	0.984	0.964	0.398598
A0A0H2VJZ9	Glutamate synthase large subunit OS=Staphylococcus epidermidis (strain ATCC 12228 / FDA PCI 1200) OX=176280 GN=SE_2312 PE=3 SV=1	SE_2312	167.71	10	13	1	18	0.98	0.995	1.083	1.085	0.88	0.975	1.116	0.0719706
Q8CST1	Polyribonucleotide nucleotidyltransferase OS=Staphylococcus epidermidis (strain ATCC 12228 / FDA PCI 1200) OX=176280 GN=pnp PE=1 SV=1	pnp	77.443	70.2	48	48	182	0.991	0.995	1.018	1.005	0.99	1.004	1.011	0.242738
A0A0H2VJ60	AlbA_2 domain-containing protein OS=Staphylococcus epidermidis (strain ATCC 12228 / FDA PCI 1200) OX=176280 GN=SE_p401 PE=4 SV=1	SE_p401	32.606	41.8	13	11	18	1.04	1.016	0.993	0.982	1.035	1.038	0.961	0.016656
Q8CPB7	Probable tautomerase SE_1045 OS=Staphylococcus epidermidis (strain ATCC 12228 / FDA PCI 1200) OX=176280 GN=SE_1045 PE=3 SV=3	SE_1045	6.8277	63.9	5	5	36	0.964	1.058	1.051	1.026	0.958	0.96	1.088	0.000903878
A0A0H2WVR2	Uncharacterized protein OS=Staphylococcus aureus (strain COL) OX=93062 GN=SACOL0675 PE=4 SV=1	SACOL0675	131.84	1.3	2	2	3	0.786	1.181	1.325	0.933	0.817	0.91	1.368	0.0529083
D4FIK8	Ferredoxin OS=Staphylococcus epidermidis M23864:W2(grey) OX=525375 GN=fer PE=4 SV=1	fer	8.9387	17.1	2	1	9	1.096	0.938	0.949	0.955	1.026	1.07	0.89	0.00441598
Q5HHP4	Phosphoglycerate kinase OS=Staphylococcus aureus (strain COL) OX=93062 GN=pgk PE=3 SV=1	pgk	42.601	33.3	15	6	77	0.943	1.039	1.133	0.992	0.932	0.975	1.11	0.066577
D4FNQ1	Thioredoxin OS=Staphylococcus epidermidis M23864:W2(grey) OX=525375 GN=HMPREF0794_2189 PE=4 SV=1	HMPREF0794_2189	12.402	64.5	6	1	65	1.009	1.043	1.043	1.011	0.92	1.009	1.054	0.174709
Q8CR47	Xylulose kinase OS=Staphylococcus epidermidis (strain ATCC 12228 / FDA PCI 1200) OX=176280 GN=xylB PE=3 SV=1	xylB	55.294	38.9	14	3	21	0.745	1.175	1.38	1.02	0.811	0.861	1.479	0.0164095
D4FP13	Urease subunit beta OS=Staphylococcus epidermidis M23864:W2(grey) OX=525375 GN=ureB PE=3 SV=1	ureB	64.418	17.3	12	11	41	1.106	0.936	0.938	0.893	1.096	1.09	0.841	0.000468247
D4FIZ3	Ribosomal silencing factor RsfS OS=Staphylococcus epidermidis M23864:W2(grey) OX=525375 GN=rsfS PE=3 SV=1	rsfS	13.614	41.9	7	1	20	1.073	1.051	1.034	0.998	0.942	0.918	1.051	0.362464
G9D5A2	60 kDa chaperonin (Fragment) OS=Staphylococcus epidermidis OX=1282 GN=groEL PE=4 SV=1	groEL	11.224	50.5	3	1	39	0.976	0.99	1.027	1.028	1.036	0.965	1.023	0.415699
Q8CT28	Phosphoribosylglycinamide formyltransferase OS=Staphylococcus epidermidis (strain ATCC 12228 / FDA PCI 1200) OX=176280 GN=purN PE=3 SV=1	purN	20.965	30.9	4	4	7	1.07	0.982	0.905	0.884	1.223	0.996	0.843	0.0683058
A0A0H2VEF3	Abi-alpha protein OS=Staphylococcus epidermidis (strain ATCC 12228 / FDA PCI 1200) OX=176280 GN=SE_0041 PE=4 SV=1	SE_0041	45.342	51.8	20	20	36	0.973	1.022	1.044	1.062	0.971	0.964	1.076	0.00314135
A0A7Z1TRE7	Methyltransferase domain-containing protein OS=Staphylococcus epidermidis OX=1282 GN=CP553_12075 PE=4 SV=1	CP553_12075	31.322	7	1	1	1
A0A0E1V9D6	Adenylate kinase OS=Staphylococcus epidermidis W23144 OX=525376 GN=adk PE=3 SV=1	adk	24.036	61.4	15	1	61	1.11	0.892	0.932	1.048	0.994	1.062	0.907	0.162765
Q8CPT6	Coenzyme A disulfide reductase OS=Staphylococcus epidermidis (strain ATCC 12228 / FDA PCI 1200) OX=176280 GN=cdr PE=3 SV=1	cdr	49.365	46.6	19	11	65	1.07	0.99	0.968	0.999	1.018	1.004	0.956	0.107888
A0A7I0A4E8	G5 domain-containing protein (Fragment) OS=Staphylococcus epidermidis OX=1282 GN=E1N12_12235 PE=4 SV=1	E1N12_12235	11.748	90.8	14	1	70	0.932	1.041	1.024	0.895	1.056	1.072	0.967	0.634344
A0A7M3F9G8	M20/M25/M40 family metallo-hydrolase OS=Staphylococcus epidermidis OX=1282 GN=E1N11_06490 PE=3 SV=1	E1N11_06490	40.29	45.2	13	3	27	1.047	0.986	0.967	0.967	1.054	0.99	0.945	0.0537136
Q5HGG8	Proline--tRNA ligase OS=Staphylococcus aureus (strain COL) OX=93062 GN=proS PE=3 SV=1	proS	63.834	5.5	3	2	12
A0A0E1VKJ5	Peptidylprolyl isomerase OS=Staphylococcus epidermidis W23144 OX=525376 GN=prsA PE=4 SV=1	prsA	75.452	48.4	41	2	263	0.971	1.026	0.997	0.982	1.014	1.014	1.002	0.921018
A0A0H2WZC6	Thiamine_BP domain-containing protein OS=Staphylococcus aureus (strain COL) OX=93062 GN=SACOL1310 PE=3 SV=1	SACOL1310	11.035	30.9	2	1	7
Q5HE11	Galactose-6-phosphate isomerase subunit LacB OS=Staphylococcus aureus (strain COL) OX=93062 GN=lacB PE=3 SV=1	lacB	18.95	7.6	1	1	3	0.977	0.971	1.028	0.896	1.068	1.088	0.924	0.200251
A0A7T9WSG9	Tetratricopeptide repeat protein OS=Staphylococcus epidermidis OX=1282 GN=I6I40_11190 PE=4 SV=1	I6I40_11190	57.318	17.3	9	1	11	0.678	1.197	1.431	0.865	0.857	0.922	1.422	0.123265
A0A7I0APA8	FUSC family protein OS=Staphylococcus epidermidis OX=1282 GN=E1N03_00465 PE=4 SV=1	E1N03_00465	68.72	5.1	3	3	3	0.924	0.959	1.138	1.114	0.942	0.922	1.152	0.0632407
Q5HN82	Glucosamine-6-phosphate isomerase family protein OS=Staphylococcus epidermidis (strain ATCC 35984 / RP62A) OX=176279 GN=SERP1390 PE=4 SV=1	SERP1390	22.709	47.2	14	10	60	0.993	1.028	1	0.979	1.006	1.012	0.999	0.926256
Q5HL66	3-hydroxy-3-methylglutaryl coenzyme A reductase OS=Staphylococcus epidermidis (strain ATCC 35984 / RP62A) OX=176279 GN=SERP2121 PE=3 SV=1	SERP2121	46.273	46.4	14	2	49	1.124	0.982	0.844	0.952	1.065	1.042	0.86	0.0410983
Q8CSC6	30S ribosomal protein S20 OS=Staphylococcus epidermidis (strain ATCC 12228 / FDA PCI 1200) OX=176280 GN=rpsT PE=3 SV=1	rpsT	9.3407	31.3	3	3	19	1.085	0.896	0.994	0.933	1.061	0.969	0.906	0.0992817
Q5HG83	GMP reductase OS=Staphylococcus aureus (strain COL) OX=93062 GN=guaC PE=3 SV=1	guaC	36.116	15.4	5	1	11
A0A7I0BJC5	Transcriptional repressor OS=Staphylococcus epidermidis OX=1282 GN=E1N03_09340 PE=3 SV=1	E1N03_09340	16.299	57.6	8	1	21	0.921	1.105	1.202	0.947	0.813	0.992	1.194	0.125298
A0A0E1VF52	Arsenical pump membrane protein OS=Staphylococcus epidermidis W23144 OX=525376 GN=arsB PE=3 SV=1	arsB	88.532	13.4	11	1	24
Q5HP51	MutT/nudix family protein OS=Staphylococcus epidermidis (strain ATCC 35984 / RP62A) OX=176279 GN=SERP1062 PE=3 SV=1	SERP1062	98.295	15.8	9	4	18	1.014	1.02	1.008	0.965	1.018	0.999	0.987	0.509881
A0A0E1VB17	Cyclic-di-AMP phosphodiesterase OS=Staphylococcus epidermidis W23144 OX=525376 GN=HMPREF0791_1768 PE=3 SV=1	HMPREF0791_1768	93.193	36.8	24	22	53	1	0.971	1.009	1.033	0.995	0.989	1.01	0.636421
Q5HGZ5	Ribonuclease J 1 OS=Staphylococcus aureus (strain COL) OX=93062 GN=rnj1 PE=3 SV=1	rnj1	62.668	35.2	18	1	42	1.229	0.835	0.779	0.849	1.183	1.21	0.68	0.000173646
A0A2G7HZ84	Class I SAM-dependent rRNA methyltransferase OS=Staphylococcus epidermidis OX=1282 GN=CP553_06065 PE=4 SV=1	CP553_06065	100.33	21	15	11	27	0.965	1.055	1.044	1.008	0.964	0.974	1.07	0.00876478
A0A5R1C0G9	ABC transporter ATP-binding protein OS=Staphylococcus epidermidis OX=1282 GN=E1N04_12740 PE=4 SV=1	E1N04_12740	32.537	13.5	3	3	3	1.022	1.016	0.992	1.002	1.014	0.976	0.999	0.975791
A0A0H2VGF2	Oxidoreductase ion channel OS=Staphylococcus epidermidis (strain ATCC 12228 / FDA PCI 1200) OX=176280 GN=SE_0367 PE=4 SV=1	SE_0367	35.003	82.7	23	6	72	0.903	1.092	1.089	1.099	0.906	0.912	1.205	1.22938e-06
D4FND7	DM13 domain-containing protein OS=Staphylococcus epidermidis M23864:W2(grey) OX=525375 GN=HMPREF0794_2075 PE=4 SV=1	HMPREF0794_2075	16.017	37.2	8	2	19	1.019	0.964	0.966	0.952	1.088	1.047	0.914	0.0100578
A0A0H2VIS7	Uncharacterized protein OS=Staphylococcus epidermidis (strain ATCC 12228 / FDA PCI 1200) OX=176280 GN=SE_p415 PE=4 SV=1	SE_p415	71.952	42.2	27	27	40	1.061	0.952	0.921	0.977	1.074	1.038	0.898	0.00555362
Q8CPZ1	Peptide chain release factor 2 OS=Staphylococcus epidermidis (strain ATCC 12228 / FDA PCI 1200) OX=176280 GN=prfB PE=3 SV=2	prfB	69.454	43.6	22	16	85	0.976	1.022	1.068	0.98	0.976	0.982	1.046	0.147189
Q8CNV5	UPF0478 protein SE_1412 OS=Staphylococcus epidermidis (strain ATCC 12228 / FDA PCI 1200) OX=176280 GN=SE_1412 PE=3 SV=1	SE_1412	18.032	68.7	11	11	100	0.979	1.018	1.012	1.009	0.99	0.982	1.03	0.00226218
Q8CQ88	ATP-dependent Clp protease ATP-binding subunit ClpC OS=Staphylococcus epidermidis (strain ATCC 12228 / FDA PCI 1200) OX=176280 GN=clpC PE=3 SV=1	clpC	91.011	68.8	59	56	210	0.923	1.062	1.083	1.055	0.921	0.933	1.152	8.78776e-05
Q5HQM5	Uncharacterized protein OS=Staphylococcus epidermidis (strain ATCC 35984 / RP62A) OX=176279 GN=SERP0523 PE=4 SV=1	SERP0523	12.577	24.5	1	1	1
Q5HF59	Probable tRNA sulfurtransferase OS=Staphylococcus aureus (strain COL) OX=93062 GN=thiI PE=3 SV=1	thiI	46.209	5.2	3	1	5	0.991	1.025	1.054	0.993	0.968	0.982	1.045	0.0795049
Q5HNJ9	Universal stress protein family OS=Staphylococcus epidermidis (strain ATCC 35984 / RP62A) OX=176279 GN=SERP1269 PE=3 SV=1	SERP1269	128.84	18.7	20	9	51	0.917	1.031	1.12	1.006	0.937	0.959	1.122	0.0306426
A0A7I0BVI5	PRD domain-containing protein (Fragment) OS=Staphylococcus epidermidis OX=1282 GN=E1M98_06345 PE=3 SV=1	E1M98_06345	25.896	27.7	6	6	8	1.019	0.964	1.016	0.948	0.994	1.082	0.946	0.16629
Q8CSP9	50S ribosomal protein L33 2 OS=Staphylococcus epidermidis (strain ATCC 12228 / FDA PCI 1200) OX=176280 GN=rpmG2 PE=3 SV=2	rpmG2	5.9459	28.6	2	2	7	0.953	1.017	1.011	0.996	0.965	0.98	1.043	0.0139239
Q5HL12	Amidohydrolase family protein OS=Staphylococcus epidermidis (strain ATCC 35984 / RP62A) OX=176279 GN=SERP2175 PE=4 SV=1	SERP2175	43.575	57.3	19	19	48	1.044	0.957	0.96	0.998	1.02	1.03	0.942	0.0166741
D4FI70	Hydrolase_4 domain-containing protein OS=Staphylococcus epidermidis M23864:W2(grey) OX=525375 GN=HMPREF0794_0258 PE=3 SV=1	HMPREF0794_0258	31.959	55.6	12	2	19	0.939	0.75	0.935	1.647	0.868	0.858	1.25	0.517636
Q5HQD8	Uncharacterized protein OS=Staphylococcus epidermidis (strain ATCC 35984 / RP62A) OX=176279 GN=SERP0615 PE=4 SV=1	SERP0615	38.718	16.2	6	3	29	0.994	1.002	1.012	1.019	0.99	0.986	1.021	0.0179108
Q5HRZ4	Single-stranded DNA-binding protein OS=Staphylococcus epidermidis (strain ATCC 35984 / RP62A) OX=176279 GN=ssb PE=3 SV=1	ssb	18.68	44.4	9	9	30	1.028	1.019	0.982	0.985	1.004	0.972	0.994	0.784167
A0A0E1VAU5	50S ribosomal protein L16 OS=Staphylococcus epidermidis W23144 OX=525376 GN=rplP PE=3 SV=1	rplP	106.79	13	10	3	33	1.006	1.017	1.011	1.047	0.989	0.949	1.044	0.0989249
A0A2R3SZJ4	Uncharacterized protein OS=Staphylococcus epidermidis OX=1282 PE=3 SV=1	--	31.426	24.7	6	5	8	1.168	0.878	0.817	0.964	1.113	1.08	0.791	0.0112484
Q8CRK5	UPF0457 protein SE_1763 OS=Staphylococcus epidermidis (strain ATCC 12228 / FDA PCI 1200) OX=176280 GN=SE_1763 PE=3 SV=1	SE_1763	10.029	66.3	5	5	13	0.997	0.971	0.994	0.944	1.023	0.997	0.964	0.100597
D4FJZ9	Uncharacterized protein OS=Staphylococcus epidermidis M23864:W2(grey) OX=525375 GN=HMPREF0794_0887 PE=4 SV=1	HMPREF0794_0887	62.788	39.6	16	9	49	1.023	1.016	1.008	1.004	0.992	0.976	1.012	0.430109
Q5HNF2	Rhodanese-like domain protein OS=Staphylococcus epidermidis (strain ATCC 35984 / RP62A) OX=176279 GN=SERP1317 PE=4 SV=1	SERP1317	11.286	97.1	9	9	42	1.027	1	1.026	1.003	0.997	0.999	1.002	0.880461
D4FMF2	YfkB-like domain protein OS=Staphylococcus epidermidis M23864:W2(grey) OX=525375 GN=HMPREF0794_1740 PE=4 SV=1	HMPREF0794_1740	74.619	18.6	11	1	24	1.002	1.062	1.03	0.96	1.002	0.962	1.029	0.443664
A0A0H2X169	Ribosome-binding ATPase YchF OS=Staphylococcus aureus (strain COL) OX=93062 GN=ychF PE=3 SV=1	ychF	40.594	27.9	9	2	31	1.009	1.062	1.002	1.006	0.991	0.98	1.03	0.225583
Q5HNG7	tRNA-binding domain-containing protein OS=Staphylococcus epidermidis (strain ATCC 35984 / RP62A) OX=176279 GN=SERP1302 PE=4 SV=1	SERP1302	21.706	85.4	13	1	68	0.978	0.95	0.988	1.007	0.994	1.051	0.974	0.402402
Q5HQ53	Pyruvate carboxylase OS=Staphylococcus epidermidis (strain ATCC 35984 / RP62A) OX=176279 GN=pyc PE=4 SV=1	pyc	197.47	47.5	70	2	270	1.39	0.856	0.693	0.912	1.115	1.127	0.678	0.0235817
A0A0E1VIN2	Polyphosphate kinase 2 OS=Staphylococcus epidermidis W23144 OX=525376 GN=HMPREF0791_2187 PE=4 SV=1	HMPREF0791_2187	56.993	44.7	23	1	36
U6C146	Ornithine carbamoyltransferase OS=Staphylococcus epidermidis OX=1282 GN=arcB PE=3 SV=1	arcB	37.512	54.8	14	12	65	1.209	0.828	0.8	0.822	1.228	1.186	0.676	1.1284e-05
A0A0H2VHR1	ABC transporter-like protein OS=Staphylococcus epidermidis (strain ATCC 12228 / FDA PCI 1200) OX=176280 GN=SE_1094 PE=4 SV=1	SE_1094	30.263	52.8	9	3	19	1.061	0.965	0.912	0.982	1.083	1.069	0.89	0.00712286
Q8CML2	HTH-type transcriptional regulator ArcR OS=Staphylococcus epidermidis (strain ATCC 12228 / FDA PCI 1200) OX=176280 GN=arcR PE=3 SV=1	arcR	26.924	26.8	6	6	8	1.173	0.903	0.857	0.885	1.123	1.107	0.777	0.000403477
Q8CQK6	Beta sliding clamp OS=Staphylococcus epidermidis (strain ATCC 12228 / FDA PCI 1200) OX=176280 GN=dnaN PE=3 SV=1	dnaN	42.101	78	23	16	81	0.979	1.018	0.977	1.053	1.006	0.987	1.026	0.342852
Q8CRG5	50S ribosomal protein L22 OS=Staphylococcus epidermidis (strain ATCC 12228 / FDA PCI 1200) OX=176280 GN=rplV PE=3 SV=1	rplV	12.821	60.7	8	8	93	0.932	1.045	1.005	1.086	0.968	0.924	1.11	0.0170166
Q5HND3	Transaldolase OS=Staphylococcus epidermidis (strain ATCC 35984 / RP62A) OX=176279 GN=tal PE=4 SV=1	tal	25.695	84	15	12	81	1.05	0.97	0.988	0.964	1.021	1.041	0.939	0.00475328
Q5HKL0	Major facilitator superfamily protein OS=Staphylococcus epidermidis (strain ATCC 35984 / RP62A) OX=176279 GN=SERP2334 PE=3 SV=1	SERP2334	48.374	6.1	3	3	4	1.048	0.983	0.975	0.994	1.021	0.978	0.969	0.208861
D4FMS0	Deoxynucleoside kinase OS=Staphylococcus epidermidis M23864:W2(grey) OX=525375 GN=HMPREF0794_1858 PE=3 SV=1	HMPREF0794_1858	26.243	53.2	8	8	23	1.035	0.94	0.915	1.039	0.998	0.996	0.955	0.31219
A0A7I0BXR4	Glucose-6-phosphate 1-dehydrogenase OS=Staphylococcus epidermidis OX=1282 GN=zwf PE=3 SV=1	zwf	56.961	65.2	29	6	99	1.039	0.932	0.994	1.036	1.001	1.023	0.967	0.351651
Q5HNZ9	5-formyltetrahydrofolate cyclo-ligase OS=Staphylococcus epidermidis (strain ATCC 35984 / RP62A) OX=176279 GN=SERP1115 PE=3 SV=1	SERP1115	21.332	27.9	5	5	15	1.071	1.052	1.065	1.013	0.911	0.945	1.069	0.247927
A0A1V0CTE7	Uncharacterized protein OS=Staphylococcus epidermidis OX=1282 PE=4 SV=1	--	9.5989	18.3	1	1	1	0.682	1.212	1.428	0.924	0.768	0.923	1.502	0.0612227
Q8CRH7	30S ribosomal protein S5 OS=Staphylococcus epidermidis (strain ATCC 12228 / FDA PCI 1200) OX=176280 GN=rpsE PE=3 SV=1	rpsE	17.699	68.7	13	3	33	1.082	0.956	0.865	1.086	1.094	0.96	0.927	0.371476
D4FJT9	Succinate dehydrogenase iron-sulfur subunit OS=Staphylococcus epidermidis M23864:W2(grey) OX=525375 GN=sdhB PE=3 SV=1	sdhB	31.431	44.6	10	10	29	1.061	0.996	0.965	0.954	0.987	1.017	0.951	0.112533
Q8CMV4	Organic hydroperoxide resistance protein-like 2 OS=Staphylococcus epidermidis (strain ATCC 12228 / FDA PCI 1200) OX=176280 GN=SE_2233 PE=3 SV=1	SE_2233	15.387	90.8	9	1	76	1.11	0.982	0.881	1.014	1.095	0.981	0.903	0.151404
Q8CNA3	Formimidoylglutamase OS=Staphylococcus epidermidis (strain ATCC 12228 / FDA PCI 1200) OX=176280 GN=hutG PE=3 SV=1	hutG	34.72	48.9	9	9	18	1.043	1.055	1.032	1.012	0.978	0.968	1.037	0.236461
Q5HQS1	Phosphoglycerate mutase family protein OS=Staphylococcus epidermidis (strain ATCC 35984 / RP62A) OX=176279 GN=SERP0476 PE=4 SV=1	SERP0476	22.212	52.8	9	9	23	1.038	0.982	1.008	0.958	0.984	1.008	0.973	0.267829
A0A0H2VFM8	Leucyl aminopeptidase OS=Staphylococcus epidermidis (strain ATCC 12228 / FDA PCI 1200) OX=176280 GN=SE_0636 PE=3 SV=1	SE_0636	54.686	39.1	14	1	37	0.978	1.033	0.999	0.981	1.049	0.973	1.004	0.877708
A0A0E1VBP2	50S ribosomal protein L20 OS=Staphylococcus epidermidis W23144 OX=525376 GN=rplT PE=3 SV=1	rplT	80.068	25.7	20	8	67	0.962	1.056	1.045	1.059	0.937	0.939	1.113	0.000328281
Q8CSS3	tRNA-2-methylthio-N(6)-dimethylallyladenosine synthase OS=Staphylococcus epidermidis (strain ATCC 12228 / FDA PCI 1200) OX=176280 GN=miaB PE=3 SV=1	miaB	58.855	43.6	20	15	34	1.14	0.917	0.84	0.984	1.081	1.039	0.841	0.0301305
Q8CSV8	Small ribosomal subunit biogenesis GTPase RsgA OS=Staphylococcus epidermidis (strain ATCC 12228 / FDA PCI 1200) OX=176280 GN=rsgA PE=3 SV=2	rsgA	33.684	32.6	8	8	12	0.962	1.071	1.035	0.976	0.928	1.022	1.058	0.21987
D4FJG8	Putative metallophosphoesterase OS=Staphylococcus epidermidis M23864:W2(grey) OX=525375 GN=HMPREF0794_0706 PE=4 SV=1	HMPREF0794_0706	29.815	37.9	10	10	24	0.927	1.039	1.058	1.025	0.971	0.956	1.094	0.00543693
Q8CTU5	Protein-arginine kinase OS=Staphylococcus epidermidis (strain ATCC 12228 / FDA PCI 1200) OX=176280 GN=mcsB PE=3 SV=1	mcsB	38.458	44.8	11	3	25	0.843	1.118	1.188	1.057	0.843	0.93	1.286	0.00591734
A0A0H2WWA0	DNA polymerase I OS=Staphylococcus aureus (strain COL) OX=93062 GN=polA PE=3 SV=1	polA	284.87	6.5	14	2	36	0.875	1.09	1.112	1.004	0.979	0.937	1.149	0.0373896
A0A7I0BBM0	Glycosyltransferase OS=Staphylococcus epidermidis OX=1282 GN=E1N10_01940 PE=4 SV=1	E1N10_01940	58.821	37.9	18	3	28	0.911	1.028	1.128	1.167	0.898	0.905	1.224	0.00620052
Q5HNS5	Rrf2 family protein OS=Staphylococcus epidermidis (strain ATCC 35984 / RP62A) OX=176279 GN=SERP1189 PE=4 SV=1	SERP1189	133.41	20.6	17	1	41
Q8CP15	Heat-inducible transcription repressor HrcA OS=Staphylococcus epidermidis (strain ATCC 12228 / FDA PCI 1200) OX=176280 GN=hrcA PE=3 SV=1	hrcA	37.204	28.9	6	1	8
Q8CPW8	Glycine cleavage system H protein OS=Staphylococcus epidermidis (strain ATCC 12228 / FDA PCI 1200) OX=176280 GN=gcvH PE=3 SV=1	gcvH	14.215	51.6	4	4	60	1.024	0.988	0.96	0.974	1.044	1.024	0.945	0.0057556
Q5HMX6	UPF0033 domain-containing protein OS=Staphylococcus epidermidis (strain ATCC 35984 / RP62A) OX=176279 GN=SERP1499 PE=3 SV=1	SERP1499	46.552	15.8	5	1	12	1.11	0.984	0.919	1.09	0.99	0.975	0.973	0.687685
A0A0E1VF57	Universal bacterial protein YeaZ OS=Staphylococcus epidermidis W23144 OX=525376 GN=yeaZ PE=4 SV=1	yeaZ	24.906	32.3	5	1	12	1.018	0.962	0.99	1.038	0.984	1.029	0.986	0.619762
Q5HKU8	CapA-related protein OS=Staphylococcus epidermidis (strain ATCC 35984 / RP62A) OX=176279 GN=SERP2244 PE=3 SV=1	SERP2244	44.08	4.6	3	3	3	0.901	1.097	1.113	1.052	0.911	0.917	1.195	0.000543754
Q8CTG5	NADPH-dependent 7-cyano-7-deazaguanine reductase OS=Staphylococcus epidermidis (strain ATCC 12228 / FDA PCI 1200) OX=176280 GN=queF PE=3 SV=1	queF	19.74	22.3	2	2	11	0.91	1.064	1.066	0.98	0.998	1.008	1.067	0.204891
A0A0E1VCR5	Uncharacterized protein OS=Staphylococcus epidermidis W23144 OX=525376 GN=HMPREF0791_1895 PE=4 SV=1	HMPREF0791_1895	15.18	9.8	1	1	1
Q5HN99	HIT family protein OS=Staphylococcus epidermidis (strain ATCC 35984 / RP62A) OX=176279 GN=SERP1373 PE=4 SV=1	SERP1373	16.053	56	7	7	25	1.025	0.966	0.984	0.947	1.018	1.044	0.938	0.00896493
Q8CS68	ATP-dependent 6-phosphofructokinase OS=Staphylococcus epidermidis (strain ATCC 12228 / FDA PCI 1200) OX=176280 GN=pfkA PE=3 SV=2	pfkA	34.882	72.7	16	16	79	1.034	0.975	0.938	1.012	1.028	1.022	0.948	0.0737327
Q5HQB3	Inosine-uridine preferring nucleoside hydrolase family protein OS=Staphylococcus epidermidis (strain ATCC 35984 / RP62A) OX=176279 GN=SERP0642 PE=4 SV=1	SERP0642	33.549	39.1	8	8	18	1.001	1.01	0.976	0.978	1.043	1.024	0.966	0.101305
A5Y5J1	DNA-directed RNA polymerase (Fragment) OS=Staphylococcus epidermidis OX=1282 GN=rpoB PE=3 SV=1	rpoB	25.658	77.2	13	1	83	1.058	0.95	1.003	1.051	0.935	1.023	0.996	0.944442
Q8CPG7	Isoprenyl transferase OS=Staphylococcus epidermidis (strain ATCC 12228 / FDA PCI 1200) OX=176280 GN=uppS PE=3 SV=1	uppS	29.807	30.1	6	2	9	1.045	0.926	0.798	1.087	1.095	1.094	0.869	0.177776
D4FIT5	TelA-like protein OS=Staphylococcus epidermidis M23864:W2(grey) OX=525375 GN=HMPREF0794_0586 PE=3 SV=1	HMPREF0794_0586	84.019	40.3	26	18	63	1.007	1.002	0.984	0.997	0.992	1.009	0.992	0.33462
A0A7I0B044	Uncharacterized protein OS=Staphylococcus epidermidis OX=1282 GN=E1N12_10595 PE=4 SV=1	E1N12_10595	26.84	11.4	2	2	2
Q5HNL2	Alkaline phosphatase synthesis transcriptional regulatory protein PhoP OS=Staphylococcus epidermidis (strain ATCC 35984 / RP62A) OX=176279 GN=phoP PE=4 SV=1	phoP	93.83	19.9	14	1	47
Q5HM82	Purine nucleoside phosphorylase DeoD-type OS=Staphylococcus epidermidis (strain ATCC 35984 / RP62A) OX=176279 GN=deoD PE=3 SV=1	deoD	25.885	61.9	10	8	76	1.076	0.914	0.897	0.989	1.101	1.023	0.875	0.0222587
A0A7I0AQ87	AI-2E family transporter OS=Staphylococcus epidermidis OX=1282 GN=E1N00_10740 PE=3 SV=1	E1N00_10740	36.413	22	6	6	9	1.04	0.969	0.918	1.046	1.022	1.036	0.947	0.215924
Q8CPU3	Argininosuccinate synthase OS=Staphylococcus epidermidis (strain ATCC 12228 / FDA PCI 1200) OX=176280 GN=argG PE=3 SV=1	argG	44.741	18.5	6	6	6	0.926	1.039	1.034	1.014	1.024	0.964	1.059	0.124611
Q8CNE1	Molybdopterin molybdenumtransferase OS=Staphylococcus epidermidis (strain ATCC 12228 / FDA PCI 1200) OX=176280 GN=moeA PE=3 SV=1	moeA	45.612	31.5	11	11	28	1.032	0.976	1.004	0.987	1	1.019	0.972	0.0859196
Q8CRI1	Translation initiation factor IF-1 OS=Staphylococcus epidermidis (strain ATCC 12228 / FDA PCI 1200) OX=176280 GN=infA PE=3 SV=1	infA	8.2655	77.8	5	5	90	0.938	1.042	1.041	1.062	0.938	0.964	1.107	0.00080369
D4FLQ6	Metallo-beta-lactamase domain protein OS=Staphylococcus epidermidis M23864:W2(grey) OX=525375 GN=yycJ PE=4 SV=1	yycJ	29.562	46.2	10	10	13	1.126	0.93	0.906	0.931	1.005	1.081	0.861	0.0126177
D4FJU5	DNA-directed DNA polymerase OS=Staphylococcus epidermidis M23864:W2(grey) OX=525375 GN=HMPREF0794_0833 PE=4 SV=1	HMPREF0794_0833	65.089	37.4	19	19	29	0.982	0.994	1.051	1.015	0.943	0.992	1.049	0.100138
A0A089V7Z2	Translation elongation factor Tu (Fragment) OS=Staphylococcus epidermidis OX=1282 GN=tuf PE=4 SV=1	tuf	21.997	89.3	18	1	266
Q9F7V3	Anti-sigma factor antagonist OS=Staphylococcus epidermidis OX=1282 GN=rsbV PE=3 SV=1	rsbV	11.946	87.7	6	6	21	1.031	0.948	0.931	1.001	1.05	1.046	0.921	0.0212115
A0A0H2VHB8	D-3-phosphoglycerate dehydrogenase OS=Staphylococcus epidermidis (strain ATCC 12228 / FDA PCI 1200) OX=176280 GN=SE_1546 PE=3 SV=1	SE_1546	36.658	61.1	21	21	42	0.988	1.033	1.023	1.008	0.982	0.989	1.035	0.00952964
A0A7I0AHR9	DUF5079 family protein OS=Staphylococcus epidermidis OX=1282 GN=E1N03_12270 PE=4 SV=1	E1N03_12270	25.731	6.8	1	1	3	0.839	1.116	1.181	0.939	0.858	1.042	1.181	0.161795
Q8CRF7	DNA topoisomerase 3 OS=Staphylococcus epidermidis (strain ATCC 12228 / FDA PCI 1200) OX=176280 GN=topB PE=3 SV=1	topB	82.362	42.1	28	28	49	1.021	1	1.035	0.985	0.985	1.014	1	0.996124
A0A7I0AJI6	DNA polymerase III subunit delta' OS=Staphylococcus epidermidis OX=1282 GN=E1N03_08860 PE=4 SV=1	E1N03_08860	35.706	44.5	9	4	14	1.029	0.969	0.963	0.907	0.944	1.141	0.912	0.200467
Q5HDT4	Molybdopterin molybdenumtransferase OS=Staphylococcus aureus (strain COL) OX=93062 GN=moeA PE=3 SV=1	moeA	45.016	3.1	1	1	1
A0A0E1VH74	Abortive infection family protein (Fragment) OS=Staphylococcus epidermidis W23144 OX=525376 GN=HMPREF0791_0356 PE=4 SV=1	HMPREF0791_0356	23.807	6.7	1	1	1	0.775	1.085	1.109	1.319	0.769	0.899	1.438	0.0106159
Q8CPA8	Aminoacyltransferase FemB OS=Staphylococcus epidermidis (strain ATCC 12228 / FDA PCI 1200) OX=176280 GN=femB PE=3 SV=1	femB	49.357	57.1	21	2	67	1.445	0.708	0.454	0.992	1.432	1.115	0.54	0.0525146
Q5HR11	DNA helicase OS=Staphylococcus epidermidis (strain ATCC 35984 / RP62A) OX=176279 GN=recQ-1 PE=3 SV=1	recQ-1	68.191	10.6	5	5	6	0.918	1.06	0.938	1.208	0.97	0.903	1.149	0.153957
Q5HPS9	Zinc metalloprotease OS=Staphylococcus epidermidis (strain ATCC 35984 / RP62A) OX=176279 GN=SERP0829 PE=3 SV=1	SERP0829	47.995	24.3	11	1	23	0.959	1.107	1.101	1.052	0.925	0.853	1.191	0.0100306
A0A0H2VI46	Uroporphyrinogen III methylase OS=Staphylococcus epidermidis (strain ATCC 12228 / FDA PCI 1200) OX=176280 GN=SE_1976 PE=3 SV=1	SE_1976	34.761	31.2	8	1	12
A0A0H2WX39	THUMP domain-containing protein OS=Staphylococcus aureus (strain COL) OX=93062 GN=SACOL1483 PE=4 SV=1	SACOL1483	43.333	16.3	7	2	12	1.03	1.061	0.978	0.962	0.985	0.993	0.998	0.930988
Q8CMQ4	NADPH-dependent oxidoreductase OS=Staphylococcus epidermidis (strain ATCC 12228 / FDA PCI 1200) OX=176280 GN=nfrA PE=3 SV=2	nfrA	28.577	39.4	8	8	29	0.932	1.061	1.099	1.072	0.884	0.925	1.179	0.00107852
Q8CNJ6	ATP synthase gamma chain OS=Staphylococcus epidermidis (strain ATCC 12228 / FDA PCI 1200) OX=176280 GN=atpG PE=3 SV=1	atpG	31.947	43.1	9	3	43	0.952	0.988	1.025	0.98	1.003	1.025	1.004	0.866596
A0A7H5C4L3	Uncharacterized protein OS=Staphylococcus epidermidis OX=1282 GN=F9B71_12280 PE=4 SV=1	F9B71_12280	14.555	32.8	6	6	32	0.98	1.02	1.03	1.07	0.96	0.939	1.084	0.0136729
Q5HPJ1	Choline/carnitine/betaine transporter OS=Staphylococcus epidermidis (strain ATCC 35984 / RP62A) OX=176279 GN=SERP0920 PE=3 SV=1	SERP0920	133.02	6.6	8	1	14
D4FN80	Uncharacterized protein OS=Staphylococcus epidermidis M23864:W2(grey) OX=525375 GN=HMPREF0794_2018 PE=4 SV=1	HMPREF0794_2018	97.057	36.6	30	4	144	0.963	1.014	1.061	1.041	0.973	0.989	1.065	0.0143815
Q5HRL1	MTS domain-containing protein OS=Staphylococcus epidermidis (strain ATCC 35984 / RP62A) OX=176279 GN=SERP0182 PE=4 SV=1	SERP0182	22.508	52	10	9	28	0.955	1.041	1.073	1.053	0.959	0.973	1.097	0.000909742
A0A7G9EG23	Bifunctional protein GlmU OS=Staphylococcus epidermidis OX=1282 GN=glmU PE=3 SV=1	glmU	49.22	58.3	19	1	75	1.038	1.027	1.002	1.042	1.003	0.974	1.019	0.438453
D4FLQ8	YycH protein OS=Staphylococcus epidermidis M23864:W2(grey) OX=525375 GN=yycH PE=4 SV=1	yycH	81.849	31.3	20	4	31	1.158	0.877	0.815	0.951	1.145	1.12	0.772	0.00465647
Q8CSU2	30S ribosomal protein S2 OS=Staphylococcus epidermidis (strain ATCC 12228 / FDA PCI 1200) OX=176280 GN=rpsB PE=3 SV=1	rpsB	29.795	53.4	17	17	114	0.93	1.06	1.062	1.074	0.942	0.918	1.146	8.95582e-05
Q5HNL3	Sensor protein kinase WalK OS=Staphylococcus epidermidis (strain ATCC 35984 / RP62A) OX=176279 GN=phoR PE=4 SV=1	phoR	64.784	33.5	18	1	22
Q8CQ79	Uncharacterized epimerase/dehydratase SE_0317 OS=Staphylococcus epidermidis (strain ATCC 12228 / FDA PCI 1200) OX=176280 GN=SE_0317 PE=3 SV=1	SE_0317	36.317	16.7	5	5	5	1.031	1.01	0.993	1.001	0.962	1.021	0.997	0.902967
A0A7I0B083	Thiol reductant ABC exporter subunit CydC OS=Staphylococcus epidermidis OX=1282 GN=cydC PE=4 SV=1	cydC	64.789	5.5	2	1	3	0.833	1.114	1.068	1.156	0.852	0.95	1.267	0.00697444
A0A0E1VEH6	Thiamine_BP domain-containing protein OS=Staphylococcus epidermidis W23144 OX=525376 GN=HMPREF0791_1344 PE=3 SV=1	HMPREF0791_1344	117.38	6.4	5	1	33	0.935	1.123	1.218	0.986	0.808	0.907	1.255	0.0410329
Q8CPY2	Probable protein-export membrane protein SecG OS=Staphylococcus epidermidis (strain ATCC 12228 / FDA PCI 1200) OX=176280 GN=secG PE=3 SV=1	secG	8.4192	23.4	1	1	2	0.925	0.958	0.937	1.251	0.984	0.955	1.098	0.41772
A0A6N4IUP0	DUF4097 domain-containing protein (Fragment) OS=Staphylococcus epidermidis OX=1282 GN=E1N09_12300 PE=4 SV=1	E1N09_12300	25.146	35.7	6	6	8	1.102	0.962	0.916	0.954	1.038	1.021	0.896	0.0167128
D4FNB0	Uncharacterized protein OS=Staphylococcus epidermidis M23864:W2(grey) OX=525375 GN=HMPREF0794_2048 PE=4 SV=1	HMPREF0794_2048	126.02	43	49	14	125	1.011	0.988	1.012	1.008	1.015	0.996	0.995	0.645601
D4FM22	Uncharacterized protein OS=Staphylococcus epidermidis M23864:W2(grey) OX=525375 GN=HMPREF0794_1610 PE=4 SV=1	HMPREF0794_1610	79.924	20	14	2	57	0.973	1.101	0.96	0.982	1.033	1.011	1.009	0.885064
Q5HDG4	Oxygen sensor histidine kinase NreB OS=Staphylococcus aureus (strain COL) OX=93062 GN=nreB PE=3 SV=1	nreB	39.12	4.9	2	1	2
A0A7I0BZS7	Formate acetyltransferase OS=Staphylococcus epidermidis OX=1282 GN=pflB PE=3 SV=1	pflB	85.01	69.5	50	1	447	1.123	0.915	1.019	0.89	1.04	1.055	0.878	0.0502388
Q8CSY5	dITP/XTP pyrophosphatase OS=Staphylococcus epidermidis (strain ATCC 12228 / FDA PCI 1200) OX=176280 GN=SE_0844 PE=3 SV=1	SE_0844	21.646	70.8	11	11	39	1.034	0.956	1.008	1.008	1.06	0.979	0.967	0.321844
Q5HP58	DNA-binding response regulator SrrA OS=Staphylococcus epidermidis (strain ATCC 35984 / RP62A) OX=176279 GN=srrA PE=4 SV=1	srrA	28.115	71.4	18	18	87	1.012	0.993	0.984	1	0.977	1.011	0.992	0.576103
Q5HPA6	Nfu_N domain-containing protein OS=Staphylococcus epidermidis (strain ATCC 35984 / RP62A) OX=176279 GN=SERP1007 PE=4 SV=1	SERP1007	9.8248	82.6	5	5	18	1.039	0.988	0.97	0.991	1.046	1.043	0.943	0.00106873
A0A7U0GDM9	Uncharacterized protein OS=Staphylococcus virus vB_SepS_48 OX=2797320 PE=4 SV=1	--	9.7661	9.2	1	1	1
A0A2G7I0P3	Methionyl-tRNA formyltransferase OS=Staphylococcus epidermidis OX=1282 GN=fmt PE=3 SV=1	fmt	90.26	58.6	36	15	134	0.976	1.02	1.043	1.011	0.987	0.997	1.039	0.0274544
A0A0H2WZY6	Universal stress protein family OS=Staphylococcus aureus (strain COL) OX=93062 GN=SACOL1753 PE=3 SV=1	SACOL1753	15.226	5.1	1	1	3	0.923	1.107	1.072	1.005	0.883	0.904	1.175	0.00674181
Q8CQ32	Iron-sulfur cluster repair protein ScdA OS=Staphylococcus epidermidis (strain ATCC 12228 / FDA PCI 1200) OX=176280 GN=scdA PE=3 SV=1	scdA	25.936	44.6	7	7	25	1.098	0.938	0.906	0.962	1.089	1.062	0.864	0.00185859
D4FJQ5	Aspartate carbamoyltransferase OS=Staphylococcus epidermidis M23864:W2(grey) OX=525375 GN=pyrB PE=3 SV=1	pyrB	32.416	33.8	7	7	11	1.021	0.964	0.945	0.984	1.044	1.05	0.929	0.00690895
Q8CML7	Queuine tRNA-ribosyltransferase OS=Staphylococcus epidermidis (strain ATCC 12228 / FDA PCI 1200) OX=176280 GN=tgt PE=3 SV=1	tgt	43.121	43.5	14	14	27	0.963	0.994	1.034	0.992	1.061	1.026	0.99	0.783029
Q5HF65	Alanine dehydrogenase 2 OS=Staphylococcus aureus (strain COL) OX=93062 GN=ald2 PE=3 SV=1	ald2	40.105	11.3	4	1	23	1.076	0.929	0.92	0.882	1.105	1.137	0.823	0.000985322
A0A5R1C574	Isopentenyl-diphosphate delta-isomerase OS=Staphylococcus epidermidis OX=1282 GN=fni PE=3 SV=1	fni	76.809	45.2	27	12	121	1.019	1.058	1.017	1.019	0.963	0.981	1.044	0.108118
Q5HGD1	Aerobic glycerol-3-phosphate dehydrogenase OS=Staphylococcus aureus (strain COL) OX=93062 GN=glpD PE=3 SV=1	glpD	62.387	17.8	9	1	68	1.1	0.89	0.88	0.986	1.083	1.111	0.837	0.0082616
D4FMU7	Amino acid permease OS=Staphylococcus epidermidis M23864:W2(grey) OX=525375 GN=HMPREF0794_1885 PE=4 SV=1	HMPREF0794_1885	54.273	1.6	1	1	2	0.96	0.996	1.049	1.051	0.95	1.002	1.063	0.0631882
A0A7I0AAE4	Phenylalanine--tRNA ligase beta subunit OS=Staphylococcus epidermidis OX=1282 GN=pheT PE=3 SV=1	pheT	89.432	46.5	30	1	101
A0A0H2WZD2	Polysaccharide biosynthesis protein OS=Staphylococcus aureus (strain COL) OX=93062 GN=SACOL1804 PE=4 SV=1	SACOL1804	177.36	4.3	5	1	21
Q5HRR6	Ribosomal RNA small subunit methyltransferase I OS=Staphylococcus epidermidis (strain ATCC 35984 / RP62A) OX=176279 GN=rsmI PE=3 SV=1	rsmI	77.413	21.5	12	2	30	1.231	0.85	0.704	1.059	1.159	1.074	0.754	0.077185
Q8CNY0	Glyceraldehyde-3-phosphate dehydrogenase 2 OS=Staphylococcus epidermidis (strain ATCC 12228 / FDA PCI 1200) OX=176280 GN=gapA2 PE=3 SV=1	gapA2	37.092	4.4	2	2	2
A0A7H5C9D6	Signal recognition particle receptor FtsY OS=Staphylococcus epidermidis OX=1282 GN=ftsY PE=3 SV=1	ftsY	45.508	54.7	16	16	60	0.985	0.992	0.977	0.984	1.021	1.019	0.976	0.126587
Q8CQ03	Protein NrdI OS=Staphylococcus epidermidis (strain ATCC 12228 / FDA PCI 1200) OX=176280 GN=nrdI PE=3 SV=1	nrdI	14.955	27.3	4	4	7	0.976	1.026	1.104	1.048	0.944	0.906	1.125	0.0185482
Q8GQG7	NAD_binding_9 domain-containing protein OS=Staphylococcus epidermidis OX=1282 PE=4 SV=1	--	57.404	34	13	13	15	0.987	1.06	1.018	1.044	0.96	0.968	1.071	0.00884941
A0A0H2WVP2	Lipoate--protein ligase OS=Staphylococcus aureus (strain COL) OX=93062 GN=SACOL1034 PE=4 SV=1	SACOL1034	71.121	6.2	3	1	6
A0A0E1VD92	16S rRNA m5C967 methyltransferase OS=Staphylococcus epidermidis W23144 OX=525376 GN=sun PE=3 SV=1	sun	92.383	37.4	25	1	74	1.187	0.888	0.82	1.034	1.112	1.022	0.826	0.0735317
Q8CQL4	tRNA (guanine-N(1)-)-methyltransferase OS=Staphylococcus epidermidis (strain ATCC 12228 / FDA PCI 1200) OX=176280 GN=trmD PE=3 SV=1	trmD	28.417	57.6	6	6	7	1.014	1.062	1.041	0.996	0.936	0.998	1.051	0.180201
Q8CQU5	Ribosomal RNA small subunit methyltransferase A OS=Staphylococcus epidermidis (strain ATCC 12228 / FDA PCI 1200) OX=176280 GN=rsmA PE=3 SV=1	rsmA	33.493	52.4	12	4	28	0.997	1.001	1.04	1.015	1.054	0.961	1.015	0.630982
A0A0H2WZ54	Peptidase M20 domain-containing protein 2 OS=Staphylococcus aureus (strain COL) OX=93062 GN=SACOL2125 PE=3 SV=1	SACOL2125	42.958	13.5	4	2	7	0.908	1.173	1.225	0.964	0.807	0.896	1.288	0.0394444
A0A7G9ECK3	Uroporphyrinogen decarboxylase OS=Staphylococcus epidermidis OX=1282 GN=hemE PE=3 SV=1	hemE	38.957	29.4	8	8	21	0.955	1.074	1.065	1.053	0.908	0.91	1.151	0.00127139
A0A7I0B214	Acetyltransferase (Fragment) OS=Staphylococcus epidermidis OX=1282 GN=E1M98_03885 PE=3 SV=1	E1M98_03885	67.916	18.5	8	1	13	0.964	1.086	0.944	1.05	0.978	0.989	1.051	0.326665
A0A7I0AND9	DUF4064 domain-containing protein OS=Staphylococcus epidermidis OX=1282 GN=E1N03_01595 PE=4 SV=1	E1N03_01595	22.106	5.6	1	1	15	0.852	1.116	1.114	0.95	0.946	0.986	1.142	0.127505
Q937Z1	Bifunctional protein GlmU OS=Staphylococcus epidermidis OX=1282 GN=glmU PE=3 SV=1	glmU	48.944	57.6	19	1	74	0.994	1.021	1.01	1.04	0.945	1	1.045	0.0902509
A0A7H5C9Q9	Phenylalanine--tRNA ligase alpha subunit OS=Staphylococcus epidermidis OX=1282 GN=pheS PE=3 SV=1	pheS	40.156	41.8	14	1	53
Q8CS97	GTP pyrophosphokinase OS=Staphylococcus epidermidis (strain ATCC 12228 / FDA PCI 1200) OX=176280 GN=relA PE=3 SV=1	relA	83.467	41.8	27	27	50	1.031	1.001	0.999	1.03	0.977	0.98	1.014	0.518679
A0A7I0ASM6	Signal transduction protein TRAP OS=Staphylococcus epidermidis OX=1282 GN=E1N00_05935 PE=3 SV=1	E1N00_05935	9.2362	65.4	3	3	9	1.048	1.008	0.954	1.059	1.024	0.993	0.986	0.679091
Q5HLV5	bPH_3 domain-containing protein OS=Staphylococcus epidermidis (strain ATCC 35984 / RP62A) OX=176279 GN=SERP1877 PE=4 SV=1	SERP1877	12.445	56.1	4	4	13	1.01	0.98	0.956	1.044	1.023	0.996	0.984	0.568915
D4FK26	Cell envelope-like function transcriptional attenuator common domain protein OS=Staphylococcus epidermidis M23864:W2(grey) OX=525375 GN=HMPREF0794_0914 PE=3 SV=1	HMPREF0794_0914	131.66	17.1	21	1	71
Q5HI63	Alcohol dehydrogenase OS=Staphylococcus aureus (strain COL) OX=93062 GN=adh PE=3 SV=1	adh	36.047	13.4	4	1	11	0.806	1.19	1.382	0.877	0.796	0.908	1.374	0.0974606
A0A7I0ALQ9	MOSC domain-containing protein OS=Staphylococcus epidermidis OX=1282 GN=E1N03_04495 PE=4 SV=1	E1N03_04495	26.464	26.1	5	5	6	1.252	0.808	0.684	0.966	1.277	1.11	0.675	0.0212455
D4FND4	Histidine kinase OS=Staphylococcus epidermidis M23864:W2(grey) OX=525375 GN=saeS PE=4 SV=1	saeS	36.883	13.7	4	3	5	1.144	0.934	0.838	0.973	1.059	1.061	0.841	0.0272578
Q8CSB2	Uridine kinase OS=Staphylococcus epidermidis (strain ATCC 12228 / FDA PCI 1200) OX=176280 GN=udk PE=3 SV=1	udk	23.585	57.5	10	10	19	1.013	1.03	0.986	1.003	1.002	0.993	1.004	0.813102
Q8CNZ8	UPF0735 ACT domain-containing protein SE_1326 OS=Staphylococcus epidermidis (strain ATCC 12228 / FDA PCI 1200) OX=176280 GN=SE_1326 PE=3 SV=2	SE_1326	17.361	39.7	6	6	13	0.978	1.002	1.04	1.002	1.06	1.008	0.999	0.992707
Q8CNF8	6-phospho-beta-galactosidase OS=Staphylococcus epidermidis (strain ATCC 12228 / FDA PCI 1200) OX=176280 GN=lacG PE=3 SV=1	lacG	140.65	39.4	46	17	106	1.052	0.958	0.883	0.988	1.083	1.05	0.888	0.0268441
D4FI69	Proline dehydrogenase OS=Staphylococcus epidermidis M23864:W2(grey) OX=525375 GN=putA PE=4 SV=1	putA	78.504	33.6	22	1	169
D4FIS5	Response regulator ArlR OS=Staphylococcus epidermidis M23864:W2(grey) OX=525375 GN=arlR PE=4 SV=1	arlR	114	9.1	7	6	12	0.998	0.959	0.705	1.013	0.949	1.107	0.877	0.307869
A0A7H5C7M6	FAD-containing oxidoreductase OS=Staphylococcus epidermidis OX=1282 GN=F9B71_06095 PE=3 SV=1	F9B71_06095	50.349	37.1	15	1	28
Q8CSN9	DNA topoisomerase 4 subunit B OS=Staphylococcus epidermidis (strain ATCC 12228 / FDA PCI 1200) OX=176280 GN=parE PE=3 SV=2	parE	74.469	44.6	29	13	58	0.991	1.032	1.005	1.019	0.981	0.992	1.031	0.0224579
Q5HPD9	Uncharacterized protein OS=Staphylococcus epidermidis (strain ATCC 35984 / RP62A) OX=176279 GN=SERP0973 PE=4 SV=1	SERP0973	12.588	18.6	2	2	3	1.214	0.76	0.797	1.056	1.155	1.098	0.754	0.0516317
Q8CTT9	Putative TrmH family tRNA/rRNA methyltransferase OS=Staphylococcus epidermidis (strain ATCC 12228 / FDA PCI 1200) OX=176280 GN=SE_0294 PE=3 SV=2	SE_0294	27.321	63.9	12	12	25	1.016	0.996	1.025	0.993	1.005	0.997	0.999	0.908998
Q5HQ65	DUF4064 domain-containing protein OS=Staphylococcus epidermidis (strain ATCC 35984 / RP62A) OX=176279 GN=SERP0691 PE=4 SV=1	SERP0691	99.315	12.6	16	15	49	1.034	0.98	0.992	0.967	0.993	1.026	0.963	0.0580768
Q5HM48	Uncharacterized protein OS=Staphylococcus epidermidis (strain ATCC 35984 / RP62A) OX=176279 GN=SERP1781 PE=3 SV=1	SERP1781	76.379	20.8	10	2	22
Q5HLH2	Peptidase_C39_2 domain-containing protein OS=Staphylococcus epidermidis (strain ATCC 35984 / RP62A) OX=176279 GN=SERP2015 PE=4 SV=1	SERP2015	20.236	20.7	3	3	4	0.93	1.062	1.026	1.089	0.92	0.931	1.142	0.00168125
Q8CP08	5'-methylthioadenosine/S-adenosylhomocysteine nucleosidase OS=Staphylococcus epidermidis (strain ATCC 12228 / FDA PCI 1200) OX=176280 GN=mtnN PE=3 SV=1	mtnN	24.943	57.5	12	1	30	0.897	0.987	1.043	1.049	1.059	0.981	1.048	0.396201
I6SMM4	Peptidoglycan hydrolase OS=Staphylococcus virus IPLA5 OX=1197952 GN=IPLA5_0025 PE=4 SV=1	IPLA5_0025	69.919	1.3	1	1	1	0.95	1.091	0.997	1.006	0.97	0.995	1.061	0.135777
A0A0H2VFS6	Alginate lyase OS=Staphylococcus epidermidis (strain ATCC 12228 / FDA PCI 1200) OX=176280 GN=SE_0096 PE=4 SV=1	SE_0096	34.721	61.9	18	18	66	0.818	1.125	1.137	1.176	0.849	0.85	1.366	7.06239e-05
Q5HKR7	UDP-N-acetylglucosamine--peptide N-acetylglucosaminyltransferase GtfA subunit OS=Staphylococcus epidermidis (strain ATCC 35984 / RP62A) OX=176279 GN=gtfA PE=3 SV=1	gtfA	58.555	8.4	4	4	5	1.027	0.912	1.072	0.944	1.034	1.04	0.944	0.291481
Q5HLK0	Nitrate reductase (quinone) OS=Staphylococcus epidermidis (strain ATCC 35984 / RP62A) OX=176279 GN=narG PE=3 SV=1	narG	139.77	47.8	49	36	150	0.672	1.26	1.301	1.315	0.652	0.656	1.958	1.83319e-06
Q5HPS4	YlxR domain-containing protein OS=Staphylococcus epidermidis (strain ATCC 35984 / RP62A) OX=176279 GN=SERP0834 PE=4 SV=1	SERP0834	11.028	47.9	5	1	12	1.111	0.948	0.856	1.144	1.026	0.953	0.954	0.61357
Q5HKC1	Arsenical resistance operon trans-acting repressor OS=Staphylococcus epidermidis (strain ATCC 35984 / RP62A) OX=176279 GN=arsD PE=4 SV=1	arsD	34.134	28.4	7	5	18	1.004	1.011	1.041	0.989	1.001	1.023	1.004	0.813652
Q5HKA9	Uncharacterized protein OS=Staphylococcus epidermidis (strain ATCC 35984 / RP62A) OX=176279 GN=SERP2439 PE=4 SV=1	SERP2439	16.688	12.2	2	2	14	0.899	1.103	1.094	1.059	0.918	0.87	1.212	0.000652116
Q5HPP3	Glycerol uptake operon antiterminator regulatory protein OS=Staphylococcus epidermidis (strain ATCC 35984 / RP62A) OX=176279 GN=glpP PE=4 SV=1	glpP	19.993	58.8	9	8	26	1.164	0.93	0.887	0.975	1.056	1.064	0.85	0.0174927
D4FJN8	16S rRNA m5C967 methyltransferase OS=Staphylococcus epidermidis M23864:W2(grey) OX=525375 GN=sun PE=3 SV=1	sun	49.81	43.7	15	4	35	0.929	1.018	1.052	1.05	0.952	1.001	1.083	0.03093
Q8CMY5	Fructose-bisphosphate aldolase class 1 OS=Staphylococcus epidermidis (strain ATCC 12228 / FDA PCI 1200) OX=176280 GN=fda PE=3 SV=3	fda	33.052	92.2	37	2	712	0.934	1.039	0.993	1.03	0.96	0.982	1.065	0.035359
D4FK78	TrkA C-terminal domain protein OS=Staphylococcus epidermidis M23864:W2(grey) OX=525375 GN=HMPREF0794_0966 PE=4 SV=1	HMPREF0794_0966	69.112	12.9	7	2	9	1.092	0.93	1.024	1.048	0.967	0.965	0.993	0.905516
D4FMT8	Acetyl-CoA C-acetyltransferase OS=Staphylococcus epidermidis M23864:W2(grey) OX=525375 GN=atoB2 PE=3 SV=1	atoB2	36.809	2.4	1	1	1	0.89	1.146	1.152	0.997	0.892	0.909	1.224	0.0137878
W5RV62	Endopeptidase OS=Staphylococcus phage vB_SepS_SEP9 OX=1434319 GN=SEP9_016 PE=4 SV=1	SEP9_016	59.386	1.9	1	1	1	0.852	1.139	1.049	1.008	0.979	0.965	1.143	0.0776709
Q8CPH5	Succinate--CoA ligase [ADP-forming] subunit beta OS=Staphylococcus epidermidis (strain ATCC 12228 / FDA PCI 1200) OX=176280 GN=sucC PE=3 SV=1	sucC	42.025	57.7	20	20	81	0.98	1.002	1.009	0.996	0.981	1.003	1.015	0.162321
Q8CPS8	Adapter protein MecA OS=Staphylococcus epidermidis (strain ATCC 12228 / FDA PCI 1200) OX=176280 GN=mecA PE=3 SV=1	mecA	28.715	18.3	6	6	7	1.064	0.938	0.89	1.049	1.041	0.944	0.944	0.386454
Q5HLP7	Magnesium transport protein CorA OS=Staphylococcus epidermidis (strain ATCC 35984 / RP62A) OX=176279 GN=corA PE=3 SV=1	corA	37.494	12.7	4	4	4	0.981	1.01	1.04	1.024	0.978	0.946	1.058	0.0170106
D4FLA9	N-acetyltransferase OS=Staphylococcus epidermidis M23864:W2(grey) OX=525375 GN=HMPREF0794_1347 PE=3 SV=1	HMPREF0794_1347	30.526	22.2	5	5	7	0.93	1.018	1.021	1.032	0.975	1.032	1.046	0.208409
Q8CRJ2	Galactose-6-phosphate isomerase subunit LacA OS=Staphylococcus epidermidis (strain ATCC 12228 / FDA PCI 1200) OX=176280 GN=lacA PE=3 SV=1	lacA	15.593	58.5	8	8	33	0.982	0.987	1.008	1.035	0.988	1.01	1.017	0.364755
C6ZRI8	AtlE (Fragment) OS=Staphylococcus epidermidis OX=1282 GN=atlE PE=4 SV=1	atlE	12.207	81.1	6	1	47
A0A0E1VB95	Glyoxalase family protein OS=Staphylococcus epidermidis W23144 OX=525376 GN=HMPREF0791_1863 PE=4 SV=1	HMPREF0791_1863	76.749	8.5	6	3	13	0.903	1.08	1.089	1.048	0.893	0.916	1.186	0.000244666
Q5HIA9	GTP cyclohydrolase FolE2 OS=Staphylococcus aureus (strain COL) OX=93062 GN=folE2 PE=3 SV=1	folE2	33.481	16.4	4	1	7	0.442	1.053	1.289	1.126	1.045	0.998	1.396	0.234563
A0A0H2WWL5	Peptidase_M78 domain-containing protein OS=Staphylococcus aureus (strain COL) OX=93062 GN=SACOL1851 PE=4 SV=1	SACOL1851	24.681	6.6	1	1	1
D4FID1	Citrate synthase OS=Staphylococcus epidermidis M23864:W2(grey) OX=525375 GN=gltA PE=3 SV=1	gltA	42.708	56.6	19	2	63	1.158	0.893	0.844	0.982	1.07	1.048	0.83	0.0250392
D4FNW3	TVP38/TMEM64 family membrane protein OS=Staphylococcus epidermidis M23864:W2(grey) OX=525375 GN=HMPREF0794_2251 PE=3 SV=1	HMPREF0794_2251	68.824	23.6	12	1	53	0.892	1.02	1.097	1.084	0.904	0.997	1.146	0.0302782
Q8CRN2	UPF0340 protein SE_1711 OS=Staphylococcus epidermidis (strain ATCC 12228 / FDA PCI 1200) OX=176280 GN=SE_1711 PE=3 SV=1	SE_1711	19.153	45.4	7	1	21	1.024	0.934	1.015	0.97	1.039	1.048	0.938	0.0618367
Q5HMF1	RNA polymerase sigma factor OS=Staphylococcus epidermidis (strain ATCC 35984 / RP62A) OX=176279 GN=rpoF PE=3 SV=1	rpoF	88.577	14.5	12	9	15	0.997	0.998	1.018	1.002	1.019	0.989	1.004	0.70679
D4FNB5	HTH-type transcriptional regulator MgrA OS=Staphylococcus epidermidis M23864:W2(grey) OX=525375 GN=mgrA PE=4 SV=1	mgrA	17.152	64.6	11	11	36	0.997	1.014	1.018	1.01	1.003	0.986	1.019	0.027751
A0A509LPU7	AAA family ATPase OS=Staphylococcus epidermidis OX=1282 GN=D9V05_10620 PE=4 SV=1	D9V05_10620	53.656	51.6	23	23	54	1.04	0.964	0.964	0.996	1.045	1.026	0.94	0.00702491
U6C115	HTH-type transcriptional regulator ArcR OS=Staphylococcus epidermidis OX=1282 PE=4 SV=1	--	27.086	19.2	5	5	7	1.254	0.787	0.851	0.838	1.266	1.175	0.67	0.000280366
D4FIW8	Aminoacyltransferase FemA OS=Staphylococcus epidermidis M23864:W2(grey) OX=525375 GN=femA PE=3 SV=1	femA	90.058	43.6	26	18	92	0.988	1.01	1.002	1.049	0.979	0.986	1.037	0.0682819
Q5HM91	Uncharacterized protein OS=Staphylococcus epidermidis (strain ATCC 35984 / RP62A) OX=176279 GN=SERP1738 PE=4 SV=1	SERP1738	25.853	47.1	8	8	29	1.017	0.989	0.988	1.011	0.974	0.991	1.002	0.892208
D4FK91	Tryptophan--tRNA ligase OS=Staphylococcus epidermidis M23864:W2(grey) OX=525375 GN=trpS PE=3 SV=1	trpS	66.744	41.6	20	18	61	1.023	0.97	0.962	1.006	1.04	1.011	0.956	0.0470582
A0A7Z1QVB0	2-oxoisovalerate dehydrogenase OS=Staphylococcus epidermidis OX=1282 GN=CP553_11870 PE=4 SV=1	CP553_11870	36.664	65.4	16	1	48	0.997	1.029	1.157	0.957	0.864	0.995	1.1	0.262522
Q5HM64	Iron-sulfur cluster carrier protein OS=Staphylococcus epidermidis (strain ATCC 35984 / RP62A) OX=176279 GN=SERP1765 PE=3 SV=1	SERP1765	83.984	43.7	33	32	92	1.169	0.757	0.832	0.815	1.191	1.236	0.669	0.000258246
Q5HKY9	Uncharacterized protein OS=Staphylococcus epidermidis (strain ATCC 35984 / RP62A) OX=176279 GN=SERP2198 PE=4 SV=1	SERP2198	47.326	6.5	3	3	5	0.989	1.092	1.034	0.991	0.956	0.986	1.063	0.113348
Q8CRJ4	Tagatose-6-phosphate kinase OS=Staphylococcus epidermidis (strain ATCC 12228 / FDA PCI 1200) OX=176280 GN=lacC PE=3 SV=1	lacC	34.229	13.9	2	2	3	0.965	1.011	1.049	1.062	0.94	0.96	1.09	0.00699597
Q5HP34	Dihydrolipoyl dehydrogenase OS=Staphylococcus epidermidis (strain ATCC 35984 / RP62A) OX=176279 GN=lpdA PE=3 SV=1	lpdA	51.356	42.3	14	14	39	1.023	0.98	0.93	1.022	1.013	0.996	0.967	0.294389
Q5HKJ4	Ornithine carbamoyltransferase OS=Staphylococcus epidermidis (strain ATCC 35984 / RP62A) OX=176279 GN=arcB-2 PE=3 SV=1	arcB-2	37.551	72.7	17	8	59	1.182	0.831	0.829	0.773	1.248	1.23	0.665	0.000142324
Q8CTU1	Cysteine--tRNA ligase OS=Staphylococcus epidermidis (strain ATCC 12228 / FDA PCI 1200) OX=176280 GN=cysS PE=3 SV=1	cysS	53.929	58.8	27	1	71	0.903	1.048	1.207	1.002	0.908	0.938	1.185	0.0439
Q8CNK6	Holo-[acyl-carrier-protein] synthase OS=Staphylococcus epidermidis (strain ATCC 12228 / FDA PCI 1200) OX=176280 GN=acpS PE=3 SV=1	acpS	13.535	28.2	5	5	7	1.033	1.035	1.017	0.984	0.978	0.984	1.014	0.580571
A0A2G7HYB2	Uncharacterized protein OS=Staphylococcus epidermidis OX=1282 GN=ATM22_02980 PE=4 SV=1	ATM22_02980	6.7655	57.1	3	3	4	0.958	0.949	1.085	1.022	1.029	0.975	1.032	0.532751
Q8CST4	Translation initiation factor IF-2 OS=Staphylococcus epidermidis (strain ATCC 12228 / FDA PCI 1200) OX=176280 GN=infB PE=3 SV=1	infB	79.343	62.1	34	34	142	0.996	1.018	1	1	1.003	0.985	1.011	0.227376
Q8CQC2	Probable succinyl-diaminopimelate desuccinylase OS=Staphylococcus epidermidis (strain ATCC 12228 / FDA PCI 1200) OX=176280 GN=dapE PE=3 SV=1	dapE	44.972	11.6	5	5	6	1.29	0.81	0.79	0.826	1.208	1.158	0.664	0.000271428
A0A0H2VE95	Galactosamine-containing minor teichoic acid biosynthesis protein OS=Staphylococcus epidermidis (strain ATCC 12228 / FDA PCI 1200) OX=176280 GN=SE_0168 PE=4 SV=1	SE_0168	104.19	5.9	5	4	5	0.763	1.196	1.213	0.992	0.869	0.931	1.327	0.0318148
Q5HH21	Bifunctional protein FolD OS=Staphylococcus aureus (strain COL) OX=93062 GN=folD PE=3 SV=1	folD	30.843	18.2	4	1	11
Q5HE75	Fructose-bisphosphate aldolase OS=Staphylococcus aureus (strain COL) OX=93062 GN=fba PE=3 SV=1	fba	30.836	25.9	7	1	44
A0A4Q9W2S4	Cell division protein DivIC OS=Staphylococcus epidermidis OX=1282 GN=CP553_09320 PE=4 SV=1	CP553_09320	15.716	39.8	6	6	16	1.021	1.023	0.964	1	0.998	1.017	0.984	0.426413
Q8CNX4	Isocitrate dehydrogenase [NADP] OS=Staphylococcus epidermidis (strain ATCC 12228 / FDA PCI 1200) OX=176280 GN=icd PE=3 SV=1	icd	46.618	62.6	24	24	88	1.022	0.96	0.956	0.981	1.042	1.048	0.931	0.0029094
A0A7I0A7F5	Mannose-6-phosphate isomerase OS=Staphylococcus epidermidis OX=1282 GN=E1N12_05210 PE=3 SV=1	E1N12_05210	35.552	34	7	7	14	1.06	0.984	0.904	0.962	1.036	1.057	0.904	0.0182141
Q8CNR4	Foldase protein PrsA OS=Staphylococcus epidermidis (strain ATCC 12228 / FDA PCI 1200) OX=176280 GN=prsA PE=3 SV=1	prsA	36.499	57.5	25	3	101	1.074	0.988	1.038	1.01	0.923	0.882	1.055	0.408422
Q8CQU9	Peptidyl-tRNA hydrolase OS=Staphylococcus epidermidis (strain ATCC 12228 / FDA PCI 1200) OX=176280 GN=pth PE=3 SV=1	pth	21.705	46.8	9	9	23	1.031	0.977	0.974	1.005	1.01	0.995	0.974	0.136074
A0A7I0ACQ0	DUF4930 family protein OS=Staphylococcus epidermidis OX=1282 GN=E1N10_09185 PE=4 SV=1	E1N10_09185	16.949	64.1	6	6	8	1.057	0.939	0.941	0.996	1.043	1.049	0.913	0.00983774
D4FLA5	Uncharacterized protein OS=Staphylococcus epidermidis M23864:W2(grey) OX=525375 GN=HMPREF0794_1343 PE=4 SV=1	HMPREF0794_1343	57.173	7.8	2	2	3	0.876	1.111	1.124	1.004	0.953	0.911	1.182	0.0183777
D4FKB6	Putative 3-methyladenine DNA glycosylase OS=Staphylococcus epidermidis M23864:W2(grey) OX=525375 GN=HMPREF0794_1004 PE=3 SV=1	HMPREF0794_1004	22.626	34.2	6	6	10	0.973	1.013	1.013	1.039	0.97	0.966	1.054	0.00389467
Q8CTE6	Phosphatidylglycerol--prolipoprotein diacylglyceryl transferase OS=Staphylococcus epidermidis (strain ATCC 12228 / FDA PCI 1200) OX=176280 GN=lgt PE=3 SV=1	lgt	31.799	13.3	3	3	3	0.989	0.956	1.046	1.081	1.01	0.966	1.04	0.385747
A0A7I0AMP4	Response regulator transcription factor OS=Staphylococcus epidermidis OX=1282 GN=E1N03_02600 PE=4 SV=1	E1N03_02600	26.898	15.3	4	1	9	1.037	0.975	1.005	0.957	1.045	1.01	0.95	0.0429201
Q5HPK2	LexA repressor OS=Staphylococcus epidermidis (strain ATCC 35984 / RP62A) OX=176279 GN=lexA PE=3 SV=1	lexA	82.33	12.3	6	4	24	1.004	1.015	1.017	1.035	0.953	0.985	1.042	0.0638125
A0A0H2WXJ4	Acyl-CoA synthetase OS=Staphylococcus aureus (strain COL) OX=93062 GN=SACOL0164 PE=3 SV=1	SACOL0164	273.47	1	1	1	1	0.939	1.043	1.053	1.094	0.922	0.947	1.136	0.00154442
A0A7G9EGH9	Mini-ribonuclease 3 OS=Staphylococcus epidermidis OX=1282 GN=mrnC PE=3 SV=1	mrnC	69.873	35.3	18	3	64	0.935	1.044	1	1.008	0.909	1.007	1.071	0.107193
A0A0H2VJ24	Uncharacterized protein OS=Staphylococcus epidermidis (strain ATCC 12228 / FDA PCI 1200) OX=176280 GN=SE_1885 PE=4 SV=1	SE_1885	102.08	27.8	21	3	51	1.072	0.889	0.872	0.97	1.076	1.169	0.823	0.0108359
Q8CNY6	Glutamyl-tRNA reductase OS=Staphylococcus epidermidis (strain ATCC 12228 / FDA PCI 1200) OX=176280 GN=hemA PE=3 SV=1	hemA	50.151	45.3	13	13	24	0.862	1.182	1.103	1.126	0.854	0.891	1.308	0.000375527
Q8CP63	Glycerol-3-phosphate dehydrogenase [NAD(P)+] OS=Staphylococcus epidermidis (strain ATCC 12228 / FDA PCI 1200) OX=176280 GN=gpsA PE=3 SV=2	gpsA	36.142	47.9	14	14	69	1.058	0.953	0.954	1.001	1.046	1.027	0.929	0.0157228
A0A0H2WYJ3	Conserved domain protein OS=Staphylococcus aureus (strain COL) OX=93062 GN=SACOL0207 PE=4 SV=1	SACOL0207	117.25	4.4	3	1	11	0.908	1.076	1.084	1.093	0.861	0.94	1.201	0.00209792
D4FMF7	Uncharacterized protein OS=Staphylococcus epidermidis M23864:W2(grey) OX=525375 GN=HMPREF0794_1745 PE=4 SV=1	HMPREF0794_1745	12.31	66.3	6	6	14	0.96	0.996	1.026	1.058	1	1.002	1.04	0.156004
Q8CQR0	Xanthine phosphoribosyltransferase OS=Staphylococcus epidermidis (strain ATCC 12228 / FDA PCI 1200) OX=176280 GN=xpt PE=3 SV=1	xpt	20.707	54.2	8	8	29	0.903	1.086	1.07	1.086	0.891	0.933	1.189	0.000285385
Q8CNF7	PTS system lactose-specific EIICB component OS=Staphylococcus epidermidis (strain ATCC 12228 / FDA PCI 1200) OX=176280 GN=lacE PE=3 SV=1	lacE	63.765	15.1	8	8	11	1.147	0.874	0.813	0.942	1.121	1.135	0.773	0.0037935
Q5HPG8	ThiJ/PfpI family protein OS=Staphylococcus epidermidis (strain ATCC 35984 / RP62A) OX=176279 GN=SERP0944 PE=4 SV=1	SERP0944	23.93	37.4	8	3	28	0.946	1.038	1.068	1.06	0.944	0.948	1.116	0.000222003
A0A0H2WWN0	S1 RNA binding domain protein OS=Staphylococcus aureus (strain COL) OX=93062 GN=SACOL2053 PE=4 SV=1	SACOL2053	80.934	6.1	5	1	10	1.053	1.03	0.917	1.026	1.019	0.984	0.973	0.541073
Q5HJZ1	DNA gyrase subunit B OS=Staphylococcus aureus (strain COL) OX=93062 GN=gyrB PE=3 SV=3	gyrB	72.511	21.4	12	1	27	0.859	1.112	1.123	1.052	0.948	0.896	1.216	0.00501866
A0A0H2VJB5	ABC transporter ecsB OS=Staphylococcus epidermidis (strain ATCC 12228 / FDA PCI 1200) OX=176280 GN=SE_1516 PE=4 SV=1	SE_1516	48.581	14.7	6	2	11	1.134	0.908	0.859	0.914	1.142	1.106	0.793	0.000449145
A0A0H2VK43	Uncharacterized protein OS=Staphylococcus epidermidis (strain ATCC 12228 / FDA PCI 1200) OX=176280 GN=SE_1987 PE=4 SV=1	SE_1987	23.052	17.7	5	1	5	1.066	0.919	0.947	0.965	1.102	1.045	0.881	0.00384241
D4FNI3	YigZ family protein OS=Staphylococcus epidermidis M23864:W2(grey) OX=525375 GN=yvyE PE=3 SV=1	yvyE	24.014	76.1	15	15	24	1.033	1.019	0.953	0.982	1.032	1.005	0.962	0.143311
Q8CRU6	Uncharacterized RNA methyltransferase SE_1582 OS=Staphylococcus epidermidis (strain ATCC 12228 / FDA PCI 1200) OX=176280 GN=SE_1582 PE=3 SV=2	SE_1582	52.395	31.6	15	15	21	0.962	1.017	1.042	1.047	1.002	0.977	1.056	0.0214296
Q8CT62	NAD kinase OS=Staphylococcus epidermidis (strain ATCC 12228 / FDA PCI 1200) OX=176280 GN=nadK PE=3 SV=1	nadK	30.603	16.7	4	4	16	0.844	1.139	1.221	0.985	0.901	0.904	1.263	0.0266648
A0A7I0BF73	30S ribosomal protein S1 OS=Staphylococcus epidermidis OX=1282 GN=rpsA PE=4 SV=1	rpsA	43.367	81.9	29	1	285	0.967	1.121	0.935	0.976	1.033	0.987	1.015	0.842757
A0A7I0AKS8	Alpha/beta fold hydrolase OS=Staphylococcus epidermidis OX=1282 GN=E1N03_06660 PE=4 SV=1	E1N03_06660	28.132	21.1	6	1	11	0.956	0.957	1.07	1.024	1.002	1.004	1.03	0.470597
Q5HLD6	Uncharacterized protein OS=Staphylococcus epidermidis (strain ATCC 35984 / RP62A) OX=176279 GN=SERP2051 PE=4 SV=1	SERP2051	7.172	38.1	2	2	4	1.117	0.895	0.849	1.031	1.12	1.05	0.844	0.0491871
Q5HIR6	Alkyl hydroperoxide reductase subunit F OS=Staphylococcus aureus (strain COL) OX=93062 GN=ahpF PE=3 SV=1	ahpF	54.72	11.6	6	1	20
Q5HL14	Signal transduction protein TRAP OS=Staphylococcus epidermidis (strain ATCC 35984 / RP62A) OX=176279 GN=SERP2173 PE=3 SV=1	SERP2173	38.101	20.1	7	4	13	0.941	0.945	0.991	0.992	1.124	1.031	0.946	0.376538
Q8CQL3	tRNA dimethylallyltransferase OS=Staphylococcus epidermidis (strain ATCC 12228 / FDA PCI 1200) OX=176280 GN=miaA PE=1 SV=1	miaA	38.525	28	8	8	14	1.039	0.973	0.985	0.964	1.033	1.041	0.939	0.000680781
Q8CPN0	Spermidine/putrescine import ATP-binding protein PotA OS=Staphylococcus epidermidis (strain ATCC 12228 / FDA PCI 1200) OX=176280 GN=potA PE=3 SV=1	potA	41.515	7.4	2	2	2	0.827	0.974	1.089	1.243	0.944	0.911	1.233	0.0635813
Q8CRG0	50S ribosomal protein L3 OS=Staphylococcus epidermidis (strain ATCC 12228 / FDA PCI 1200) OX=176280 GN=rplC PE=3 SV=1	rplC	23.669	73.2	13	8	159	0.94	1.06	1.045	1.059	0.927	0.956	1.121	0.000339868
Q8CQ62	Phosphate acetyltransferase OS=Staphylococcus epidermidis (strain ATCC 12228 / FDA PCI 1200) OX=176280 GN=pta PE=3 SV=1	pta	35.087	61.4	12	1	58	1.026	0.927	0.972	0.944	1.13	1.042	0.889	0.0238573
Q8CRG9	50S ribosomal protein L14 OS=Staphylococcus epidermidis (strain ATCC 12228 / FDA PCI 1200) OX=176280 GN=rplN PE=3 SV=1	rplN	13.15	49.2	9	9	37	0.929	1.075	1.088	1.044	0.93	0.913	1.157	0.000435501
Q5HME3	bPH_2 domain-containing protein OS=Staphylococcus epidermidis (strain ATCC 35984 / RP62A) OX=176279 GN=SERP1685 PE=4 SV=1	SERP1685	19.654	12.4	2	2	2	0.985	0.93	0.992	0.973	1.093	1.061	0.922	0.0917698
Q5HPA0	Uncharacterized protein OS=Staphylococcus epidermidis (strain ATCC 35984 / RP62A) OX=176279 GN=SERP1013 PE=4 SV=1	SERP1013	178.38	26.6	36	2	58	0.976	0.97	0.992	0.981	0.964	1.036	0.989	0.66824
Q5HLJ0	Formate/nitrite transporter family protein OS=Staphylococcus epidermidis (strain ATCC 35984 / RP62A) OX=176279 GN=SERP1997 PE=4 SV=1	SERP1997	30.596	8.1	1	1	1	1.065	0.873	0.909	0.979	1.113	1.111	0.839	0.0085398
Q5HPE8	Aspartate-semialdehyde dehydrogenase OS=Staphylococcus epidermidis (strain ATCC 35984 / RP62A) OX=176279 GN=asd PE=3 SV=1	asd	36.395	36.2	10	10	12	0.852	1.111	1.156	1.155	0.865	0.878	1.319	6.1133e-05
A0A4Y1PGP9	Translation elongation factor Tu (Fragment) OS=Staphylococcus epidermidis OX=1282 GN=tuf PE=3 SV=1	tuf	29.386	80.2	21	1	311	0.943	1.082	1.027	1.057	0.928	0.965	1.116	0.00432437
Q5HRW9	Uncharacterized protein OS=Staphylococcus epidermidis (strain ATCC 35984 / RP62A) OX=176279 GN=SERP0073 PE=4 SV=1	SERP0073	21.053	38.6	6	6	28	1.033	0.97	0.991	0.938	1.061	1.042	0.924	0.0115271
Q5HN93	AAA_27 domain-containing protein OS=Staphylococcus epidermidis (strain ATCC 35984 / RP62A) OX=176279 GN=SERP1379 PE=4 SV=1	SERP1379	382.21	23.7	70	24	193	0.99	0.991	1.028	1.014	0.987	0.992	1.022	0.12078
Q8CSU1	Uridylate kinase OS=Staphylococcus epidermidis (strain ATCC 12228 / FDA PCI 1200) OX=176280 GN=pyrH PE=3 SV=1	pyrH	26.102	48.8	9	9	37	0.959	1.038	1.077	1.028	0.952	0.963	1.094	0.00360066
D4FNF8	Aldehyde-alcohol dehydrogenase OS=Staphylococcus epidermidis M23864:W2(grey) OX=525375 GN=aad PE=3 SV=1	aad	97.481	56.1	45	1	318
A0A7I0APG7	Uncharacterized protein (Fragment) OS=Staphylococcus epidermidis OX=1282 GN=E1N00_12250 PE=4 SV=1	E1N00_12250	41.674	4.8	1	1	4	0.895	1.047	1.092	1.063	0.9	0.982	1.153	0.0115962
Q8CSD3	Endoribonuclease YbeY OS=Staphylococcus epidermidis (strain ATCC 12228 / FDA PCI 1200) OX=176280 GN=ybeY PE=3 SV=1	ybeY	17.998	55.5	6	3	18	1.199	0.918	0.905	0.918	1.042	1.075	0.827	0.011638
Q5HLC1	Uncharacterized protein OS=Staphylococcus epidermidis (strain ATCC 35984 / RP62A) OX=176279 GN=SERP2066 PE=4 SV=1	SERP2066	16.188	68.6	10	10	19	0.894	1.008	1.085	1.095	0.903	0.908	1.179	0.00353882
A0A7I0AMS0	HAMP domain-containing histidine kinase OS=Staphylococcus epidermidis OX=1282 GN=E1N03_02855 PE=4 SV=1	E1N03_02855	41.091	26.9	9	1	10	1.077	0.953	0.986	0.97	1.077	0.978	0.929	0.0958062
Q5HL39	Uncharacterized protein OS=Staphylococcus epidermidis (strain ATCC 35984 / RP62A) OX=176279 GN=SERP2148 PE=4 SV=1	SERP2148	49.692	12.4	6	6	8	0.958	1.086	1.186	0.996	0.867	0.836	1.228	0.0342549
Q8CUB8	3-oxoacyl-[acyl-carrier-protein] synthase 3 protein 2 OS=Staphylococcus epidermidis (strain ATCC 12228 / FDA PCI 1200) OX=176280 GN=fabH2 PE=3 SV=1	fabH2	35.999	30.7	9	9	14	0.965	1.006	0.992	1.038	0.96	0.98	1.045	0.0407936
A0A0H2WZM9	Coenzyme A biosynthesis bifunctional protein CoaBC OS=Staphylococcus aureus (strain COL) OX=93062 GN=coaBC PE=3 SV=1	coaBC	44.399	6.7	3	1	5	0.871	1.104	1.163	1.104	0.866	0.87	1.293	0.000124063
A0A7I0AL26	Uncharacterized protein OS=Staphylococcus epidermidis OX=1282 GN=E1N03_06170 PE=4 SV=1	E1N03_06170	24.311	52.9	17	1	57	0.978	1.028	1.075	0.918	1.052	0.97	1.007	0.923715
A0A7I0BVU9	YitT family protein OS=Staphylococcus epidermidis OX=1282 GN=CP553_11820 PE=4 SV=1	CP553_11820	30.97	27.7	6	6	21	1.056	0.963	0.898	1.043	1.108	1.007	0.916	0.157502
Q8CMM0	Probable glycine dehydrogenase (decarboxylating) subunit 1 OS=Staphylococcus epidermidis (strain ATCC 12228 / FDA PCI 1200) OX=176280 GN=gcvPA PE=3 SV=1	gcvPA	49.961	46	15	15	34	1.038	0.96	0.948	0.985	1.064	1.053	0.917	0.00289551
Q8CPC2	Aconitate hydratase A OS=Staphylococcus epidermidis (strain ATCC 12228 / FDA PCI 1200) OX=176280 GN=acnA PE=3 SV=1	acnA	99.286	68.4	44	44	171	1.085	0.906	0.9	0.928	1.089	1.101	0.835	6.18885e-05
D4FNU6	Putative Na(+)/H(+) antiporter subunit E1 OS=Staphylococcus epidermidis M23864:W2(grey) OX=525375 GN=mnhE2 PE=3 SV=1	mnhE2	11.647	23.8	2	2	3	1.11	0.942	0.922	0.95	1.104	1.021	0.87	0.00815372
A0A0H2X0A1	Uncharacterized protein OS=Staphylococcus aureus (strain COL) OX=93062 GN=SACOL0427 PE=4 SV=1	SACOL0427	104.26	2.7	3	2	5	0.798	1.121	1.364	1.111	0.772	0.784	1.528	0.0034432
Q5HIB4	Serine-aspartate repeat-containing protein C OS=Staphylococcus aureus (strain COL) OX=93062 GN=sdrC PE=3 SV=1	sdrC	102.91	1.3	1	1	2	1.201	0.873	0.789	0.755	1.185	1.279	0.659	0.00104052
X2GGD8	Mercuric reductase OS=Staphylococcus epidermidis OX=1282 GN=merA PE=3 SV=1	merA	58.565	18.6	6	6	8	1.06	0.985	0.951	0.974	1.044	1.021	0.931	0.00901619
Q8CRP5	D-alanine--D-alanine ligase OS=Staphylococcus epidermidis (strain ATCC 12228 / FDA PCI 1200) OX=176280 GN=ddl PE=3 SV=1	ddl	40.404	53.8	20	1	83	0.947	1.044	1.081	1.019	0.97	0.943	1.099	0.00802467
Q5HNE8	Uncharacterized protein OS=Staphylococcus epidermidis (strain ATCC 35984 / RP62A) OX=176279 GN=SERP1321 PE=4 SV=1	SERP1321	21.113	13.4	2	2	4	0.944	1.009	1.038	1.047	0.98	0.974	1.068	0.0152563
Q8CPC9	GMP reductase OS=Staphylococcus epidermidis (strain ATCC 12228 / FDA PCI 1200) OX=176280 GN=guaC PE=3 SV=1	guaC	36.126	37.5	11	7	25	1.007	0.968	0.962	0.982	0.974	0.988	0.981	0.165617
Q5HMY8	SdrH protein OS=Staphylococcus epidermidis (strain ATCC 35984 / RP62A) OX=176279 GN=sdrH PE=4 SV=1	sdrH	53.334	24.5	10	10	17	1.052	0.979	0.924	1.027	1.039	0.99	0.951	0.227852
A0A7G9EGA8	5-methyltetrahydropteroyltriglutamate--homocysteine methyltransferase OS=Staphylococcus epidermidis OX=1282 GN=metE PE=3 SV=1	metE	85.93	45.3	31	1	87	0.709	1.243	1.432	0.857	0.769	0.93	1.467	0.100981
A0A0H2WYU0	Glycerol uptake operon antiterminator regulatory protein OS=Staphylococcus aureus (strain COL) OX=93062 GN=glpP PE=4 SV=1	glpP	91.746	3.8	3	1	4
Q8CTB6	Organic hydroperoxide resistance protein-like 1 OS=Staphylococcus epidermidis (strain ATCC 12228 / FDA PCI 1200) OX=176280 GN=SE_0591 PE=3 SV=1	SE_0591	71.962	43.2	25	1	80	0.922	1.092	1.022	1.059	0.983	0.927	1.12	0.0154204
A0A0H2WW54	Glucose-6-phosphate 1-dehydrogenase OS=Staphylococcus aureus (strain COL) OX=93062 GN=zwf PE=3 SV=1	zwf	201.24	7.9	12	1	39
D4FKZ4	Acyl-CoA synthetase OS=Staphylococcus epidermidis M23864:W2(grey) OX=525375 GN=acsA PE=4 SV=1	acsA	60.037	58.2	28	3	66	1.076	0.962	0.941	1.034	1.104	0.954	0.937	0.29743
Q8CSA8	UPF0297 protein SE_1300 OS=Staphylococcus epidermidis (strain ATCC 12228 / FDA PCI 1200) OX=176280 GN=SE_1300 PE=3 SV=1	SE_1300	10.159	68.6	6	6	35	0.882	1.071	1.109	0.92	0.954	0.994	1.095	0.255636
Q8CPW3	Acid sugar phosphatase OS=Staphylococcus epidermidis (strain ATCC 12228 / FDA PCI 1200) OX=176280 GN=nagD PE=3 SV=1	nagD	28.26	55.6	9	1	35	0.979	0.975	0.962	0.994	1.02	1.06	0.958	0.163717
Q8CP51	Pyrroline-5-carboxylate reductase OS=Staphylococcus epidermidis (strain ATCC 12228 / FDA PCI 1200) OX=176280 GN=proC PE=3 SV=1	proC	30.11	43.9	11	11	20	0.993	0.962	0.978	0.947	1.028	1.048	0.941	0.0291002
A0A0E1VBR2	Pyruvate kinase OS=Staphylococcus epidermidis W23144 OX=525376 GN=pyk PE=3 SV=1	pyk	63.033	77.8	39	1	443	1.04	0.976	0.972	0.951	1.035	1.04	0.931	0.000936434
A0A4Q9W3H8	CoA-disulfide reductase OS=Staphylococcus epidermidis OX=1282 GN=D9V05_07110 PE=4 SV=1	D9V05_07110	50.119	35.8	16	12	26	0.923	1.08	1.094	1.097	0.904	0.891	1.203	8.14358e-05
Q8CN04	1-pyrroline-5-carboxylate dehydrogenase OS=Staphylococcus epidermidis (strain ATCC 12228 / FDA PCI 1200) OX=176280 GN=rocA PE=3 SV=1	rocA	56.876	44	16	16	33	1.089	0.964	0.967	0.938	1.113	1.066	0.878	0.00117588
A0A0N0LVU7	Recombination protein RecR OS=Staphylococcus epidermidis OX=1282 GN=recR PE=3 SV=1	recR	61.069	54	26	7	136	1.033	1.03	0.998	0.998	0.967	0.992	1.011	0.625754
Q8CQ65	Uracil-DNA glycosylase OS=Staphylococcus epidermidis (strain ATCC 12228 / FDA PCI 1200) OX=176280 GN=ung PE=3 SV=1	ung	25.094	38	7	7	18	0.977	1	1.041	0.996	0.984	1.005	1.024	0.226176
Q8CNW7	Probable tRNA sulfurtransferase OS=Staphylococcus epidermidis (strain ATCC 12228 / FDA PCI 1200) OX=176280 GN=thiI PE=3 SV=1	thiI	46.086	56	19	17	50	0.953	1.029	1.023	1.02	0.951	0.986	1.063	0.00696926
Q5HRD8	NAD_synthase domain-containing protein OS=Staphylococcus epidermidis (strain ATCC 35984 / RP62A) OX=176279 GN=SERP0255 PE=4 SV=1	SERP0255	31.442	10.2	3	3	4	0.838	1.12	1.067	0.983	0.965	1.02	1.123	0.166588
Q8CSX7	Ribosomal RNA small subunit methyltransferase H OS=Staphylococcus epidermidis (strain ATCC 12228 / FDA PCI 1200) OX=176280 GN=rsmH PE=3 SV=1	rsmH	35.569	64.3	13	13	37	1.005	1.002	1.008	1.024	0.996	0.976	1.019	0.153788
A0A0H2VKC6	ABC transporter OS=Staphylococcus epidermidis (strain ATCC 12228 / FDA PCI 1200) OX=176280 GN=SE_p503 PE=4 SV=1	SE_p503	65.128	8.9	4	4	4	0.961	1.07	0.995	1.085	0.941	0.953	1.103	0.0238699
A0A6N4IV69	Transcriptional regulator (Fragment) OS=Staphylococcus epidermidis OX=1282 GN=E1N09_12260 PE=4 SV=1	E1N09_12260	6.0827	34	2	1	7	0.651	1.067	1.416	1.3	0.689	0.802	1.766	0.00561828
Q8CTX6	Formate acetyltransferase OS=Staphylococcus epidermidis (strain ATCC 12228 / FDA PCI 1200) OX=176280 GN=pflB PE=3 SV=1	pflB	85.025	72.3	51	2	479	1.11	0.933	0.885	0.948	1.09	1.112	0.835	0.00114797
Q9FD73	Diphosphomevalonate decarboxylase OS=Staphylococcus epidermidis OX=1282 GN=mvaD PE=1 SV=1	mvaD	36.438	39.4	10	10	24	0.956	0.995	1.039	1.024	0.999	0.995	1.037	0.130261
A0A7I0ASE6	Aldo/keto reductase OS=Staphylococcus epidermidis OX=1282 GN=CP553_07290 PE=4 SV=1	CP553_07290	32.126	36.7	10	1	28	0.728	1.234	1.3	1.152	0.746	0.778	1.637	0.000251629
A0A6B9V0F5	Two-component system response regulator OS=Staphylococcus epidermidis OX=1282 GN=ATM22_00435 PE=4 SV=1	ATM22_00435	26.086	17.6	3	3	5	1.045	0.899	1.053	0.971	0.958	1.09	0.945	0.390218
A0A7G9EDB6	Dihydrolipoamide acetyltransferase component of pyruvate dehydrogenase complex OS=Staphylococcus epidermidis OX=1282 GN=ATM22_06215 PE=3 SV=1	ATM22_06215	48.893	30.3	10	10	17	1.045	0.959	0.996	1.006	0.999	1.042	0.959	0.115064
A0A7I0A7G1	GNAT family N-acetyltransferase OS=Staphylococcus epidermidis OX=1282 GN=E1N12_05290 PE=4 SV=1	E1N12_05290	33.392	55.9	14	2	29	0.997	1.062	1.014	1.017	0.997	0.928	1.059	0.112309
Q5HHE4	Type II NADH:quinone oxidoreductase OS=Staphylococcus aureus (strain COL) OX=93062 GN=SACOL0944 PE=3 SV=1	SACOL0944	44.104	9	4	1	13
Q8CRN6	UDP-N-acetylglucosamine 1-carboxyvinyltransferase 1 OS=Staphylococcus epidermidis (strain ATCC 12228 / FDA PCI 1200) OX=176280 GN=murA1 PE=3 SV=1	murA1	45.119	71.7	24	24	112	0.991	0.996	0.984	1.024	1.01	0.998	1.002	0.910639
Q8CSJ2	UPF0398 protein SE_1135 OS=Staphylococcus epidermidis (strain ATCC 12228 / FDA PCI 1200) OX=176280 GN=SE_1135 PE=3 SV=1	SE_1135	22.329	4.8	1	1	1	0.949	1.029	1.076	1.05	0.882	1.011	1.11	0.0632384
A0A7H5C7H1	HAMP domain-containing histidine kinase OS=Staphylococcus epidermidis OX=1282 GN=F9B71_05780 PE=4 SV=1	F9B71_05780	41.157	26.9	9	1	9
Q5HM45	Uncharacterized protein OS=Staphylococcus epidermidis (strain ATCC 35984 / RP62A) OX=176279 GN=SERP1784 PE=4 SV=1	SERP1784	62.796	12.2	8	7	20	0.852	1.108	1.18	1.164	0.86	0.826	1.36	0.0001715
Q937Z4	Pur operon repressor OS=Staphylococcus epidermidis OX=1282 GN=purR PE=3 SV=1	purR	30.412	49.3	12	6	44	0.98	1	1.065	0.991	0.933	0.942	1.07	0.0673587
Q8CR04	Adenylyl-sulfate kinase OS=Staphylococcus epidermidis (strain ATCC 12228 / FDA PCI 1200) OX=176280 GN=cysC PE=3 SV=1	cysC	22.628	19.6	4	4	4	0.852	1.107	1.157	1.222	0.783	0.841	1.408	0.000915476
D4FJ89	Segregation and condensation protein A OS=Staphylococcus epidermidis M23864:W2(grey) OX=525375 GN=scpA PE=3 SV=1	scpA	29.651	25	5	2	7	1	1.024	1.002	1.022	0.928	1.034	1.029	0.416927
Q5HLS4	Uncharacterized protein OS=Staphylococcus epidermidis (strain ATCC 35984 / RP62A) OX=176279 GN=SERP1908 PE=4 SV=1	SERP1908	20.394	29.5	5	5	8	1.041	0.94	0.924	1.049	1.026	0.994	0.952	0.291839
Q5HGE8	CDP-diacylglycerol--glycerol-3-phosphate 3-phosphatidyltransferase OS=Staphylococcus aureus (strain COL) OX=93062 GN=pgsA PE=3 SV=1	pgsA	21.014	13	2	2	3	0.989	0.946	1.001	0.991	0.97	1.089	0.964	0.419562
Q5HN20	Prephenate dehydratase OS=Staphylococcus epidermidis (strain ATCC 35984 / RP62A) OX=176279 GN=pheA PE=4 SV=1	pheA	149.22	9	15	10	34	0.982	1.035	1.026	0.962	0.996	1.014	1.01	0.711733
A0A7I0AW52	Uncharacterized protein (Fragment) OS=Staphylococcus epidermidis OX=1282 GN=E1M98_12720 PE=4 SV=1	E1M98_12720	5.0144	73.8	7	7	27	0.685	1.209	1.272	1.248	0.706	0.712	1.773	7.06434e-06
Q5HL93	L-serine dehydratase OS=Staphylococcus epidermidis (strain ATCC 35984 / RP62A) OX=176279 GN=sdhA PE=3 SV=1	sdhA	31.25	60.2	10	10	75	1.096	0.954	0.942	0.956	1.064	1.032	0.893	0.00333809
Q5HL33	Alpha-acetolactate decarboxylase OS=Staphylococcus epidermidis (strain ATCC 35984 / RP62A) OX=176279 GN=budA PE=3 SV=1	budA	26.267	36.3	11	11	73	1.018	1.011	0.98	0.943	1.016	1.002	0.966	0.171113
Q5HM96	DUF2529 domain-containing protein OS=Staphylococcus epidermidis (strain ATCC 35984 / RP62A) OX=176279 GN=SERP1733 PE=4 SV=1	SERP1733	20.187	35.3	4	4	4	1.077	0.871	1.061	1.195	0.885	0.924	1.084	0.529863
D4FIL6	GTPase Der OS=Staphylococcus epidermidis M23864:W2(grey) OX=525375 GN=der PE=3 SV=1	der	143.63	20.7	25	18	56	0.992	0.989	1.015	0.997	1.008	1.003	0.999	0.941565
A0A7H5C5N4	Pyrimidine-nucleoside phosphorylase OS=Staphylococcus epidermidis OX=1282 GN=F9B71_10770 PE=3 SV=1	F9B71_10770	46.285	67.7	30	1	152
D4FN90	Phosphate transporter family protein OS=Staphylococcus epidermidis M23864:W2(grey) OX=525375 GN=HMPREF0794_2028 PE=4 SV=1	HMPREF0794_2028	88.179	20.7	13	1	54	0.942	1	1.108	1.023	0.953	0.978	1.09	0.061386
Q8CMT5	33 kDa chaperonin OS=Staphylococcus epidermidis (strain ATCC 12228 / FDA PCI 1200) OX=176280 GN=hslO PE=3 SV=1	hslO	31.589	51.5	13	13	46	0.994	1.058	1.04	1.008	0.889	0.963	1.091	0.0707869
A0A7I0B0B7	CHAP domain-containing protein OS=Staphylococcus epidermidis OX=1282 GN=E1M98_07045 PE=4 SV=1	E1M98_07045	22.05	54.7	7	1	32	1.634	0.93	0.828	0.838	1.075	0.8	0.74	0.285175
D4FIP9	RNase H domain-containing protein OS=Staphylococcus epidermidis M23864:W2(grey) OX=525375 GN=HMPREF0794_0550 PE=4 SV=1	HMPREF0794_0550	15.146	32.1	4	4	7	1.011	1.013	1.094	0.973	0.922	1.011	1.046	0.38522
Q8CNV2	Putative dipeptidase SE_1424 OS=Staphylococcus epidermidis (strain ATCC 12228 / FDA PCI 1200) OX=176280 GN=SE_1424 PE=3 SV=1	SE_1424	52.759	71.2	26	26	162	1.05	0.97	0.934	0.983	1.046	1.045	0.919	0.00534196
Q5HKJ8	Glycerol dehydrogenase OS=Staphylococcus epidermidis (strain ATCC 35984 / RP62A) OX=176279 GN=gldA PE=4 SV=1	gldA	40.069	80.7	27	2	715	1.014	0.978	0.876	0.957	1.128	1.142	0.856	0.0373344
A0A7Z1QW26	Alpha/beta hydrolase OS=Staphylococcus epidermidis OX=1282 GN=CP553_03615 PE=4 SV=1	CP553_03615	139.17	15.2	13	2	15	1.022	1.016	1.112	0.936	0.933	0.993	1.039	0.550386
A0A7T9WS21	Nramp family divalent metal transporter OS=Staphylococcus epidermidis OX=1282 GN=I6I40_09950 PE=4 SV=1	I6I40_09950	49.287	6.5	2	2	3	1.229	0.836	0.849	0.735	1.319	1.134	0.657	0.00266641
Q8CPP0	Phosphoribosylformylglycinamidine synthase subunit PurQ OS=Staphylococcus epidermidis (strain ATCC 12228 / FDA PCI 1200) OX=176280 GN=purQ PE=3 SV=1	purQ	24.733	66.4	11	10	21	1.071	0.981	0.933	0.919	1.039	1.107	0.881	0.00913912
A0A7G9EFB5	Acetyltransferase OS=Staphylococcus epidermidis OX=1282 GN=ATM22_09785 PE=4 SV=1	ATM22_09785	20.012	5.1	1	1	1
Q8CP22	DNA repair protein RecO OS=Staphylococcus epidermidis (strain ATCC 12228 / FDA PCI 1200) OX=176280 GN=recO PE=3 SV=1	recO	29.072	7.9	2	2	2	1.022	0.946	0.916	1.076	1.04	1.03	0.95	0.339951
D4FNB8	Malate dehydrogenase OS=Staphylococcus epidermidis M23864:W2(grey) OX=525375 GN=mdh PE=3 SV=1	mdh	90.174	38.5	25	10	77	0.978	1.051	1.061	1.041	0.924	0.956	1.103	0.00479879
Q8CMM3	UDP-N-acetylglucosamine--N-acetylmuramyl-(pentapeptide) pyrophosphoryl-undecaprenol N-acetylglucosamine transferase OS=Staphylococcus epidermidis (strain ATCC 12228 / FDA PCI 1200) OX=176280 GN=murG PE=3 SV=1	murG	40.219	49.6	17	17	33	1.022	1.022	0.996	0.965	1.005	1.031	0.975	0.240904
A0A7G9EDY3	Uncharacterized protein OS=Staphylococcus epidermidis OX=1282 GN=ATM22_07325 PE=4 SV=1	ATM22_07325	29.727	3.2	1	1	1
Q5HP02	Glucokinase OS=Staphylococcus epidermidis (strain ATCC 35984 / RP62A) OX=176279 GN=glk PE=3 SV=1	glk	35.044	45.7	13	13	49	0.991	1.001	1.01	0.985	1.006	1.007	0.997	0.779127
Q8CNJ3	ATP synthase subunit b OS=Staphylococcus epidermidis (strain ATCC 12228 / FDA PCI 1200) OX=176280 GN=atpF PE=3 SV=1	atpF	19.479	52.6	9	9	82	0.997	0.997	1.002	0.996	1.012	0.99	0.999	0.856888
Q8CNH9	Phosphopentomutase OS=Staphylococcus epidermidis (strain ATCC 12228 / FDA PCI 1200) OX=176280 GN=deoB PE=3 SV=1	deoB	44.389	84.8	30	3	161	1.044	0.917	0.866	0.948	1.027	1.033	0.88	0.0086958
Q5HPK9	Amino acid permease family protein OS=Staphylococcus epidermidis (strain ATCC 35984 / RP62A) OX=176279 GN=SERP0902 PE=4 SV=1	SERP0902	52.854	4.1	2	2	2	0.974	1.077	1.041	1.063	0.93	0.918	1.127	0.00426466
A0A7I0AE39	Sensor histidine kinase OS=Staphylococcus epidermidis OX=1282 GN=E1N10_06210 PE=4 SV=1	E1N10_06210	33.044	24.3	6	1	7	1.01	0.952	0.975	1.01	1.009	1.069	0.951	0.123046
A0A7I0AKI6	Alpha-ketoacid dehydrogenase subunit beta OS=Staphylococcus epidermidis OX=1282 GN=E1N03_08015 PE=4 SV=1	E1N03_08015	35.87	48.9	9	1	49
A0A7H5C8E2	Pseudouridine synthase OS=Staphylococcus epidermidis OX=1282 GN=F9B71_00480 PE=3 SV=1	F9B71_00480	26.468	50.9	9	9	16	0.955	0.997	1.074	1.042	0.935	0.968	1.089	0.0233899
A0A3G1RMX1	Ser-Asp rich fibrinogen-binding protein OS=Staphylococcus epidermidis OX=1282 PE=4 SV=1	--	161.03	2	2	2	3	1.08	0.821	0.939	0.882	1.117	1.217	0.774	0.00818466
D4FJ25	GTP cyclohydrolase 1 type 2 homolog OS=Staphylococcus epidermidis M23864:W2(grey) OX=525375 GN=HMPREF0794_0439 PE=3 SV=1	HMPREF0794_0439	78.572	29.6	19	12	38	1.001	0.97	0.952	0.995	1.042	1.017	0.953	0.0506383
Q5HLF3	Amino acid permease family protein OS=Staphylococcus epidermidis (strain ATCC 35984 / RP62A) OX=176279 GN=SERP2034 PE=4 SV=1	SERP2034	125.13	3.4	3	1	6	0.902	1.066	1.129	1.038	0.897	0.959	1.172	0.00836655
Q5HL75	Alcohol dehydrogenase OS=Staphylococcus epidermidis (strain ATCC 35984 / RP62A) OX=176279 GN=SERP2112 PE=3 SV=1	SERP2112	37.814	51.7	14	14	59	1.107	0.901	0.894	0.898	1.121	1.106	0.808	1.65833e-06
Q8CNE9	Lipid II:glycine glycyltransferase OS=Staphylococcus epidermidis (strain ATCC 12228 / FDA PCI 1200) OX=176280 GN=femX PE=3 SV=1	femX	47.976	49	18	18	81	0.982	1.027	1.028	0.998	0.982	0.985	1.035	0.0240372
A0A0E1VI90	ATP synthase subunit delta OS=Staphylococcus epidermidis W23144 OX=525376 GN=atpH PE=3 SV=1	atpH	90.289	26.5	19	9	44	0.975	1.03	1.058	1.02	0.981	0.963	1.065	0.00684769
Q5HDD1	6-carboxyhexanoate--CoA ligase OS=Staphylococcus aureus (strain COL) OX=93062 GN=bioW PE=3 SV=1	bioW	26.091	3.9	1	1	1
A0A7I0AIG5	Shikimate dehydrogenase (NADP(+)) OS=Staphylococcus epidermidis OX=1282 GN=aroE PE=3 SV=1	aroE	30.388	30.9	7	1	12	1.011	0.921	0.957	0.932	1.146	1.078	0.869	0.0211428
Q5HQV5	Gap transcriptional regulator OS=Staphylococcus epidermidis (strain ATCC 35984 / RP62A) OX=176279 GN=gapR PE=3 SV=1	gapR	37.451	25.8	9	9	24	1.025	0.992	0.999	0.995	0.948	1.002	1.004	0.864931
Q5HMZ0	10 kDa chaperonin OS=Staphylococcus epidermidis (strain ATCC 35984 / RP62A) OX=176279 GN=groS PE=3 SV=1	groS	10.286	81.9	7	7	38	0.961	1.018	1.082	1.006	0.933	0.97	1.084	0.0336755
Q5HQC6	Isochorismate synthase OS=Staphylococcus epidermidis (strain ATCC 35984 / RP62A) OX=176279 GN=SERP0629 PE=3 SV=1	SERP0629	52.989	46.7	20	20	49	1.025	1.007	0.987	0.966	1.018	0.986	0.977	0.245295
A0A0H2VIP3	Uncharacterized protein OS=Staphylococcus epidermidis (strain ATCC 12228 / FDA PCI 1200) OX=176280 GN=SE_p204 PE=4 SV=1	SE_p204	8.3724	60.3	5	5	14	1.096	0.84	0.935	0.954	1.053	1.124	0.834	0.0139822
Q8CPI2	Acyl carrier protein OS=Staphylococcus epidermidis (strain ATCC 12228 / FDA PCI 1200) OX=176280 GN=acpP PE=3 SV=1	acpP	8.5653	92.2	8	8	66	1.052	0.98	0.952	0.957	1.035	1.028	0.927	0.00258011
Q5HL87	Ribokinase OS=Staphylococcus epidermidis (strain ATCC 35984 / RP62A) OX=176279 GN=rbsK PE=3 SV=1	rbsK	33.109	53.7	15	15	38	1.108	0.923	0.896	0.915	1.109	1.094	0.826	4.11868e-05
Q8CQV7	Pyridoxal 5'-phosphate synthase subunit PdxS OS=Staphylococcus epidermidis (strain ATCC 12228 / FDA PCI 1200) OX=176280 GN=pdxS PE=3 SV=1	pdxS	31.952	76.3	18	18	117	0.961	1.036	1.052	1.036	0.954	0.953	1.089	0.000118862
A0A5R8XV13	Ribosomal RNA small subunit methyltransferase G OS=Staphylococcus epidermidis OX=1282 GN=rsmG PE=3 SV=1	rsmG	99.811	18.7	15	8	21	1.071	0.945	0.901	0.964	1.07	1.075	0.874	0.00253501
A0A7I0AMV9	Metal-dependent transcriptional regulator OS=Staphylococcus epidermidis OX=1282 GN=E1N03_02950 PE=3 SV=1	E1N03_02950	24.875	39.7	8	1	16
Q5HJF4	Formate acetyltransferase OS=Staphylococcus aureus (strain COL) OX=93062 GN=pflB PE=1 SV=1	pflB	84.861	27.4	21	2	137	1.271	0.801	0.701	0.899	1.23	1.195	0.65	0.00415347
Q8CR67	UTP--glucose-1-phosphate uridylyltransferase OS=Staphylococcus epidermidis (strain ATCC 12228 / FDA PCI 1200) OX=176280 GN=gtaB PE=3 SV=2	gtaB	32.424	60.4	12	12	38	1.006	1.005	0.999	0.988	0.994	0.997	0.998	0.798414
A0A0H2VHD1	Ferrichrome ABC transporter OS=Staphylococcus epidermidis (strain ATCC 12228 / FDA PCI 1200) OX=176280 GN=SE_1768 PE=4 SV=1	SE_1768	83.527	24.3	21	19	47	0.564	1.332	1.372	1.381	0.6	0.608	2.305	5.31826e-06
Q8CNG0	Alkaline shock protein 23 OS=Staphylococcus epidermidis (strain ATCC 12228 / FDA PCI 1200) OX=176280 GN=asp23 PE=3 SV=1	asp23	18.689	63.9	8	8	109	0.812	1.144	1.196	1.09	0.833	0.842	1.379	0.000373183
Q8CQK4	DNA gyrase subunit B OS=Staphylococcus epidermidis (strain ATCC 12228 / FDA PCI 1200) OX=176280 GN=gyrB PE=3 SV=1	gyrB	72.503	45.6	28	17	80	1.022	0.984	1.012	1.013	1.018	0.99	0.993	0.641653
Q8CPE9	DNA mismatch repair protein MutL OS=Staphylococcus epidermidis (strain ATCC 12228 / FDA PCI 1200) OX=176280 GN=mutL PE=3 SV=1	mutL	73.525	44.8	27	1	58
A0A7H5C486	Metallopeptidase OS=Staphylococcus epidermidis OX=1282 GN=F9B71_12770 PE=4 SV=1	F9B71_12770	35.273	54.8	15	15	108	1.031	0.982	0.946	0.952	1.043	1.055	0.92	0.00337328
A0A5R1C0R4	DUF334 domain-containing protein OS=Staphylococcus epidermidis OX=1282 GN=E1N04_12215 PE=4 SV=1	E1N04_12215	17.891	23.2	4	1	7	1.057	1.014	0.994	0.942	0.967	1.05	0.96	0.321072
A0A2G7HZ21	60 kDa chaperonin OS=Staphylococcus epidermidis OX=1282 GN=groL PE=3 SV=1	groL	57.749	77	35	20	269	0.963	1.025	1.036	1.01	0.98	0.984	1.049	0.00835041
Q58GH5	Cell division protein DivIVA OS=Staphylococcus epidermidis OX=1282 GN=divIVA PE=4 SV=1	divIVA	24.916	62.4	13	1	79	1.074	0.942	1.03	1.114	0.802	1.002	1.072	0.49706
Q8CRI4	DNA-directed RNA polymerase subunit alpha OS=Staphylococcus epidermidis (strain ATCC 12228 / FDA PCI 1200) OX=176280 GN=rpoA PE=3 SV=1	rpoA	34.985	60.5	20	20	122	0.971	1.006	1.015	1.039	0.976	0.991	1.042	0.0235426
D4FNT4	NifU-like protein OS=Staphylococcus epidermidis M23864:W2(grey) OX=525375 GN=HMPREF0794_2222 PE=4 SV=1	HMPREF0794_2222	144.66	36.4	50	3	127	1.057	0.926	1.017	1.054	0.977	0.978	0.995	0.907171
A0A7I0AWI7	N-acetyltransferase OS=Staphylococcus epidermidis OX=1282 GN=E1M98_11845 PE=4 SV=1	E1M98_11845	19.251	6.6	1	1	1
A0A7I0AL97	Uncharacterized protein OS=Staphylococcus epidermidis OX=1282 GN=E1N03_05550 PE=4 SV=1	E1N03_05550	11.5	37	2	2	2	1.056	0.903	0.946	1.08	1.051	0.999	0.943	0.339038
D4FJP6	Rqc2 homolog RqcH OS=Staphylococcus epidermidis M23864:W2(grey) OX=525375 GN=FbpA PE=3 SV=1	FbpA	65.86	58.1	27	2	60	0.93	1.037	1.094	0.978	0.969	0.974	1.082	0.0927431
Q5HNR5	Single-stranded-DNA-specific exonuclease RecJ OS=Staphylococcus epidermidis (strain ATCC 35984 / RP62A) OX=176279 GN=recJ PE=3 SV=1	recJ	162.46	25.1	29	18	42	1.032	0.96	0.948	1.024	1.072	0.99	0.948	0.179709
A0A7H5C668	Copper oxidase OS=Staphylococcus epidermidis OX=1282 GN=E1M98_05455 PE=4 SV=1	E1M98_05455	54.069	50.1	23	23	61	1.1	0.94	0.912	0.968	1.074	1.108	0.859	0.00149609
Q8CRG3	50S ribosomal protein L2 OS=Staphylococcus epidermidis (strain ATCC 12228 / FDA PCI 1200) OX=176280 GN=rplB PE=3 SV=1	rplB	30.213	57.4	14	14	137	0.952	1.035	1.025	1.042	0.982	0.965	1.07	0.00263952
Q8CRW4	UPF0374 protein SE_1551 OS=Staphylococcus epidermidis (strain ATCC 12228 / FDA PCI 1200) OX=176280 GN=SE_1551 PE=3 SV=1	SE_1551	21.648	50	8	8	17	1.082	0.948	0.97	0.982	1.018	1.079	0.912	0.0149984
Q5HQW5	YvcD protein OS=Staphylococcus epidermidis (strain ATCC 35984 / RP62A) OX=176279 GN=yvcD PE=4 SV=1	yvcD	149.13	10.4	14	5	17	0.922	1.106	1.076	1.076	0.924	0.891	1.19	0.000307326
Q8CN24	Putative aldehyde dehydrogenase AldA OS=Staphylococcus epidermidis (strain ATCC 12228 / FDA PCI 1200) OX=176280 GN=aldA PE=3 SV=1	aldA	54.246	58.4	22	22	66	0.99	1.01	1.023	1.012	0.989	0.992	1.025	0.00379707
A0A7I0AKM7	Uncharacterized protein OS=Staphylococcus epidermidis OX=1282 GN=E1N03_06540 PE=4 SV=1	E1N03_06540	25.764	34.4	8	1	14	0.978	1.039	1.04	0.974	0.964	1.018	1.031	0.320725
A0A0N1EHR1	DNA starvation/stationary phase protection protein OS=Staphylococcus epidermidis OX=1282 GN=CP553_04240 PE=3 SV=1	CP553_04240	16.823	65.5	6	6	17	1.035	0.958	0.94	0.993	1.038	1.023	0.934	0.0146143
Q8CSG7	Ribonuclease Z OS=Staphylococcus epidermidis (strain ATCC 12228 / FDA PCI 1200) OX=176280 GN=rnz PE=3 SV=1	rnz	34.685	44.4	9	9	21	1.016	1.015	0.996	0.986	1.006	0.998	0.992	0.482502
Q5HP25	Biotin carboxyl carrier protein of acetyl-CoA carboxylase OS=Staphylococcus epidermidis (strain ATCC 35984 / RP62A) OX=176279 GN=accB PE=4 SV=1	accB	17.516	36.8	3	3	23	0.926	1.018	1.024	1.006	0.99	1.002	1.045	0.153112
Q8CS83	Valine--tRNA ligase OS=Staphylococcus epidermidis (strain ATCC 12228 / FDA PCI 1200) OX=176280 GN=valS PE=3 SV=1	valS	101.75	54.9	46	46	140	1.042	0.96	0.96	0.981	1.042	1.041	0.928	0.000499529
A0A6A2BHQ2	Uncharacterized protein OS=Staphylococcus epidermidis OX=1282 GN=F9B58_05130 PE=4 SV=1	F9B58_05130	18.426	9.7	1	1	1
D4FNV1	Kinase associated protein B OS=Staphylococcus epidermidis M23864:W2(grey) OX=525375 GN=kapB PE=4 SV=1	kapB	14.998	73.8	8	8	21	1.052	0.997	0.955	0.972	0.999	1.032	0.948	0.0541065
Q8CNP9	Response regulator protein VraR OS=Staphylococcus epidermidis (strain ATCC 12228 / FDA PCI 1200) OX=176280 GN=vraR PE=3 SV=1	vraR	23.584	59.8	11	11	30	1.035	0.987	0.963	0.962	1.018	1.033	0.944	0.00418534
D2JCX8	Galactosamine-containing minor teichoic acid biosynthesis protein OS=Staphylococcus epidermidis OX=1282 GN=SAP024A_026 PE=4 SV=1	SAP024A_026	89.673	8.2	7	2	8	0.928	1.034	1.101	0.965	0.939	1.035	1.068	0.270184
A0A7I0AM28	Bifunctional hydroxymethylpyrimidine kinase/phosphomethylpyrimidine kinase OS=Staphylococcus epidermidis OX=1282 GN=thiD PE=3 SV=1	thiD	29.807	37.4	7	1	15	0.967	1.023	1.112	1.056	0.934	0.912	1.134	0.0132631
Q5HKB9	Arsenical resistance operon repressor OS=Staphylococcus epidermidis (strain ATCC 35984 / RP62A) OX=176279 GN=arsR-2 PE=4 SV=1	arsR-2	11.68	26	3	3	3	1.023	0.99	0.958	1.03	0.979	0.999	0.992	0.761219
A0A0H2WVM5	Uncharacterized protein OS=Staphylococcus aureus (strain COL) OX=93062 GN=SACOL0542 PE=4 SV=1	SACOL0542	5.4123	18.6	1	1	1
D4FJ46	Shikimate kinase OS=Staphylococcus epidermidis M23864:W2(grey) OX=525375 GN=aroK PE=3 SV=1	aroK	17.809	36.9	5	5	8	1.009	0.974	1.008	0.988	0.967	1.044	0.983	0.538913
A0A6N4IYE7	Uncharacterized protein (Fragment) OS=Staphylococcus epidermidis OX=1282 GN=E1N09_09045 PE=4 SV=1	E1N09_09045	6.232	72.5	3	3	13	0.786	1.163	1.227	0.963	0.859	0.929	1.303	0.0410004
A0A0H2VIY1	Uncharacterized protein OS=Staphylococcus epidermidis (strain ATCC 12228 / FDA PCI 1200) OX=176280 GN=SE_p202 PE=4 SV=1	SE_p202	68.31	45.3	20	7	60	1.105	0.936	0.901	0.843	1.123	1.118	0.801	0.00197302
A0A7G9EEY0	Adenylate cyclase OS=Staphylococcus epidermidis OX=1282 GN=ATM22_09085 PE=4 SV=1	ATM22_09085	23.503	40.3	6	1	24	1.13	0.958	0.875	0.978	1.029	1.075	0.869	0.0320974
D4FKU2	LysR substrate binding domain protein OS=Staphylococcus epidermidis M23864:W2(grey) OX=525375 GN=HMPREF0794_1180 PE=3 SV=1	HMPREF0794_1180	87.165	8.1	7	1	11
Q5HKK0	DAK2 domain protein OS=Staphylococcus epidermidis (strain ATCC 35984 / RP62A) OX=176279 GN=SERP2344 PE=4 SV=1	SERP2344	21.062	93.7	21	6	193	1.009	0.972	0.979	0.97	1.01	1.033	0.957	0.00583383
Q5HRU8	Cysteine synthase/cystathionine beta-synthase family protein OS=Staphylococcus epidermidis (strain ATCC 35984 / RP62A) OX=176279 GN=SERP0094 PE=4 SV=1	SERP0094	32.793	40.1	8	8	12	0.845	1.117	0.974	1.188	0.889	0.884	1.252	0.0218131
A0A7G9EE78	Phosphate acyltransferase OS=Staphylococcus epidermidis OX=1282 GN=plsX PE=3 SV=1	plsX	34.99	56	16	1	61
A0A7H5CAN1	Arsenate reductase OS=Staphylococcus epidermidis OX=1282 GN=ATM22_09540 PE=3 SV=1	ATM22_09540	13.69	47.9	5	1	18	0.951	1.031	1.023	1.05	1.012	0.946	1.067	0.046863
A0A4Y7VS94	Copper-exporting P-type ATPase OS=Staphylococcus epidermidis OX=1282 GN=D9V05_11850 PE=3 SV=1	D9V05_11850	86.17	31.4	20	20	33	0.978	1.033	1.029	1.038	0.992	0.971	1.054	0.0014724
A0A7H5C941	Oligoendopeptidase F OS=Staphylococcus epidermidis OX=1282 GN=pepF PE=3 SV=1	pepF	69.8	30.8	16	1	36
Q5HQN1	Uncharacterized protein OS=Staphylococcus epidermidis (strain ATCC 35984 / RP62A) OX=176279 GN=SERP0517 PE=4 SV=1	SERP0517	86.713	13.8	13	2	72	0.973	1.046	1.055	1.003	0.951	0.979	1.069	0.0204299
Q5HP99	NAD(P)-bd_dom domain-containing protein OS=Staphylococcus epidermidis (strain ATCC 35984 / RP62A) OX=176279 GN=SERP1014 PE=4 SV=1	SERP1014	23.948	76.4	20	20	87	1.046	0.972	0.948	0.993	1.036	1.015	0.941	0.0188213
Q8CPH0	ATP-dependent protease ATPase subunit HslU OS=Staphylococcus epidermidis (strain ATCC 12228 / FDA PCI 1200) OX=176280 GN=hslU PE=3 SV=1	hslU	52.453	55.5	20	1	83	0.786	1.104	1.065	1.096	0.929	1.004	1.201	0.0617396
D4FMG4	Uncharacterized protein OS=Staphylococcus epidermidis M23864:W2(grey) OX=525375 GN=HMPREF0794_1752 PE=3 SV=1	HMPREF0794_1752	153.99	13.3	19	7	46	1.096	0.924	0.912	1.048	1.084	1.074	0.886	0.0516881
Q8CPU0	ATP-dependent helicase/deoxyribonuclease subunit B OS=Staphylococcus epidermidis (strain ATCC 12228 / FDA PCI 1200) OX=176280 GN=addB PE=3 SV=1	addB	134.92	28	29	1	43	1.056	0.978	0.936	1.015	1.094	0.96	0.942	0.264542
Q5HRF0	Uncharacterized protein OS=Staphylococcus epidermidis (strain ATCC 35984 / RP62A) OX=176279 GN=SERP0243 PE=4 SV=1	SERP0243	16.204	12.1	1	1	1
Q8CNC5	Urease accessory protein UreD OS=Staphylococcus epidermidis (strain ATCC 12228 / FDA PCI 1200) OX=176280 GN=ureD PE=3 SV=1	ureD	32.304	14	2	2	3	1.058	0.954	0.953	0.943	1.123	1.065	0.878	0.00251527
Q8CNM5	Accessory gene regulator protein A OS=Staphylococcus epidermidis (strain ATCC 12228 / FDA PCI 1200) OX=176280 GN=agrA PE=3 SV=1	agrA	27.937	52.5	12	7	27	1.009	1.003	0.954	1.006	1.053	0.997	0.969	0.252898
Q5HKJ5	Uncharacterized protein OS=Staphylococcus epidermidis (strain ATCC 35984 / RP62A) OX=176279 GN=SERP2350 PE=4 SV=1	SERP2350	8.9449	77	5	5	17	0.928	1.051	1.022	0.984	0.989	0.99	1.052	0.153555
A0A7I0C044	LPXTG cell wall anchor domain-containing protein OS=Staphylococcus epidermidis OX=1282 GN=E1M98_01935 PE=4 SV=1	E1M98_01935	33.01	66.5	19	1	62
Q8CP24	RNA polymerase sigma factor SigA OS=Staphylococcus epidermidis (strain ATCC 12228 / FDA PCI 1200) OX=176280 GN=sigA PE=3 SV=1	sigA	42.255	56.5	21	21	56	0.953	1.038	1.052	1.032	0.967	0.972	1.08	0.00073404
Q5HQD7	Lipoate--protein ligase OS=Staphylococcus epidermidis (strain ATCC 35984 / RP62A) OX=176279 GN=SERP0616 PE=4 SV=1	SERP0616	38.121	42.4	11	9	44	0.995	0.998	1.025	1.03	0.998	0.98	1.027	0.07924
Q5HPR3	Peptidase_M16_C domain-containing protein OS=Staphylococcus epidermidis (strain ATCC 35984 / RP62A) OX=176279 GN=SERP0845 PE=4 SV=1	SERP0845	48.999	42.3	18	3	33	0.851	1.018	1.104	1.068	0.971	0.921	1.163	0.0278766
A0A509LUL3	Transcriptional regulator OS=Staphylococcus epidermidis OX=1282 GN=D9V05_02720 PE=4 SV=1	D9V05_02720	17.816	7.4	1	1	1
A0A7I0AWW9	Phosphate acyltransferase OS=Staphylococcus epidermidis OX=1282 GN=plsX PE=3 SV=1	plsX	34.934	71.7	21	1	87	0.873	0.887	1.12	1.006	0.963	1.156	1.007	0.934391
Q5HRP3	ATP-dependent zinc metalloprotease FtsH OS=Staphylococcus epidermidis (strain ATCC 35984 / RP62A) OX=176279 GN=ftsH PE=3 SV=1	ftsH	77.864	53.3	31	19	129	1.006	1.012	1.011	1.025	0.979	0.992	1.024	0.0588926
Q8CSB0	UPF0473 protein SE_1298 OS=Staphylococcus epidermidis (strain ATCC 12228 / FDA PCI 1200) OX=176280 GN=SE_1298 PE=3 SV=1	SE_1298	11.892	99	6	6	67	1.033	0.994	0.942	0.951	1.055	1.067	0.915	0.00957618
A0A5R1C1Z6	Arsenical pump-driving ATPase OS=Staphylococcus epidermidis OX=1282 GN=arsA PE=4 SV=1	arsA	66.157	30.1	16	16	20	1.013	1.025	1.023	1	0.993	0.977	1.022	0.175158
D4FJE7	Glutamine synthetase OS=Staphylococcus epidermidis M23864:W2(grey) OX=525375 GN=glnA PE=3 SV=1	glnA	121.02	59	49	23	286	1.005	0.998	0.99	1.029	1.002	0.996	1.005	0.72695
D4FJL8	Signal recognition particle protein OS=Staphylococcus epidermidis M23864:W2(grey) OX=525375 GN=ffh PE=3 SV=1	ffh	50.636	52.7	21	21	63	0.991	1.02	1.015	1.003	0.987	0.996	1.022	0.0195488
P30199	Epidermin leader peptide-processing serine protease EpiP OS=Staphylococcus epidermidis OX=1282 GN=epiP PE=3 SV=1	epiP	51.813	1.5	1	1	1
Q8CSX6	UDP-N-acetylmuramoylalanine--D-glutamate ligase OS=Staphylococcus epidermidis (strain ATCC 12228 / FDA PCI 1200) OX=176280 GN=murD PE=3 SV=1	murD	50.148	39.6	13	2	47	1.094	0.898	0.936	0.958	1.083	1.01	0.876	0.0136975
Q5HLE3	Uncharacterized protein OS=Staphylococcus epidermidis (strain ATCC 35984 / RP62A) OX=176279 GN=SERP2044 PE=4 SV=1	SERP2044	6.9108	11.3	1	1	1	0.966	0.992	1.029	0.983	1.083	0.973	0.994	0.909412
D4FN85	Response regulator protein GraR OS=Staphylococcus epidermidis M23864:W2(grey) OX=525375 GN=graR PE=4 SV=1	graR	57.121	40.9	21	17	46	1.006	0.966	0.954	0.965	1.049	1.04	0.932	0.00632875
A0A1W5JRI0	DNA-directed RNA polymerase (Fragment) OS=Staphylococcus epidermidis OX=1282 PE=3 SV=1	--	30.582	73	17	1	91
Q8CPR2	UDP-N-acetylmuramoyl-L-alanyl-D-glutamate--L-lysine ligase OS=Staphylococcus epidermidis (strain ATCC 12228 / FDA PCI 1200) OX=176280 GN=murE PE=3 SV=1	murE	54.276	52.8	18	1	46	0.918	0.975	1.114	1.008	1.087	0.9	1.066	0.411281
Q5HMC4	YwpF protein OS=Staphylococcus epidermidis (strain ATCC 35984 / RP62A) OX=176279 GN=ywpF PE=4 SV=1	ywpF	16.931	41.8	3	3	5	0.932	0.991	1.031	0.985	1.043	1.037	0.998	0.98959
Q5HKT3	EIIA OS=Staphylococcus epidermidis (strain ATCC 35984 / RP62A) OX=176279 GN=SERP2259 PE=4 SV=1	SERP2259	72.447	2.2	1	1	2	1.018	1.041	1.041	1.064	0.934	0.912	1.098	0.0498757
Q8CSV2	Transcription factor FapR OS=Staphylococcus epidermidis (strain ATCC 12228 / FDA PCI 1200) OX=176280 GN=fapR PE=3 SV=2	fapR	21.42	22.6	4	4	8	0.987	1.02	0.984	1.029	1.028	1.021	0.999	0.958977
A0A0H2WVZ4	Uncharacterized protein OS=Staphylococcus aureus (strain COL) OX=93062 GN=SACOL1373 PE=4 SV=1	SACOL1373	60.968	10.5	6	1	12	1.072	0.958	0.991	0.934	1.03	1.048	0.915	0.0127731
Q8CRN3	Serine hydroxymethyltransferase OS=Staphylococcus epidermidis (strain ATCC 12228 / FDA PCI 1200) OX=176280 GN=glyA PE=3 SV=1	glyA	45.241	69.7	26	26	143	1.03	0.99	0.96	0.969	1.012	1.027	0.951	0.00914247
A0A7I0APU7	DHA2 family efflux MFS transporter permease subunit OS=Staphylococcus epidermidis OX=1282 GN=CP553_03725 PE=3 SV=1	CP553_03725	52.208	4.2	2	1	3	1.157	0.948	0.736	1.098	1.032	1.078	0.852	0.227621
Q5HHR7	Protein translocase subunit SecA 1 OS=Staphylococcus aureus (strain COL) OX=93062 GN=secA1 PE=3 SV=1	secA1	95.959	32.7	28	1	69	1.05	0.919	0.893	0.995	1.149	1.045	0.865	0.0317197
Q5HQ19	Phenol soluble modulin beta 1 OS=Staphylococcus epidermidis (strain ATCC 35984 / RP62A) OX=176279 GN=SERP0738 PE=3 SV=1	SERP0738	27.455	16.1	4	4	5	1.024	1.006	1.008	1.019	0.99	0.965	1.018	0.359505
D4FJ51	Rhodanese-like protein OS=Staphylococcus epidermidis M23864:W2(grey) OX=525375 GN=HMPREF0794_0465 PE=4 SV=1	HMPREF0794_0465	14.821	39.8	6	1	22	1.054	1.01	0.942	0.904	1.06	1.066	0.898	0.0289405
Q5HP66	Pyridine nucleotide-disulfide oxidoreductase family protein OS=Staphylococcus epidermidis (strain ATCC 35984 / RP62A) OX=176279 GN=SERP1047 PE=4 SV=1	SERP1047	36.813	57.3	13	13	52	1.012	1.013	1.002	1.016	0.992	0.982	1.015	0.200002
A0A0H2WWL2	Accessory gene regulator protein C OS=Staphylococcus aureus (strain COL) OX=93062 GN=argC2 PE=1 SV=1	argC2	147.8	10.3	12	1	21	0.956	0.911	1.06	0.981	0.99	1.119	0.963	0.596582
D4FIG7	Cell shape-determining protein MreC OS=Staphylococcus epidermidis M23864:W2(grey) OX=525375 GN=mreC PE=3 SV=1	mreC	30.976	45.9	10	9	20	1.004	1.02	1.025	0.987	0.984	1.017	1.009	0.591155
A0A7I0A4K4	Resolvase OS=Staphylococcus epidermidis OX=1282 GN=E1N12_10550 PE=4 SV=1	E1N12_10550	21.045	37.8	6	6	7	1.007	0.971	0.959	1.065	1.011	0.974	1.001	0.999215
A0A0E1VBM2	Uncharacterized protein OS=Staphylococcus epidermidis W23144 OX=525376 GN=HMPREF0791_2399 PE=4 SV=1	HMPREF0791_2399	5.08	31	1	1	3	0.766	1.137	1.228	1.037	0.861	0.918	1.337	0.0157082
Q5HFJ3	GTPase Era OS=Staphylococcus aureus (strain COL) OX=93062 GN=era PE=3 SV=1	era	90.598	16.4	11	1	42	1.068	1.004	0.985	1.013	0.957	0.996	0.994	0.879614
D4FKA1	Uncharacterized protein OS=Staphylococcus epidermidis M23864:W2(grey) OX=525375 GN=HMPREF0794_0989 PE=3 SV=1	HMPREF0794_0989	155.54	12.9	14	6	45	1.129	0.916	0.846	0.993	1.135	1.056	0.83	0.0220457
Q8CRT8	Heptaprenylglyceryl phosphate synthase OS=Staphylococcus epidermidis (strain ATCC 12228 / FDA PCI 1200) OX=176280 GN=pcrB PE=3 SV=1	pcrB	69.555	36.1	18	4	53	1.013	0.893	0.916	1.101	1.081	1.032	0.931	0.332793
A0A0E1VEC3	Triosephosphate isomerase OS=Staphylococcus epidermidis W23144 OX=525376 GN=tpiA PE=3 SV=1	tpiA	27.367	89.7	23	1	347	0.958	1.068	1.094	0.974	0.983	0.932	1.092	0.0883322
D4FME7	Uncharacterized protein OS=Staphylococcus epidermidis M23864:W2(grey) OX=525375 GN=HMPREF0794_1735 PE=4 SV=1	HMPREF0794_1735	10.68	61.7	6	6	21	0.89	1.079	1.004	1.026	0.987	0.971	1.092	0.0839457
A0A0H2WWM4	Uncharacterized protein OS=Staphylococcus aureus (strain COL) OX=93062 GN=SACOL1359 PE=4 SV=1	SACOL1359	23.381	9.2	1	1	1	0.687	1.201	1.617	0.889	0.65	0.875	1.676	0.0642833
Q5HN43	Lipid II isoglutaminyl synthase (glutamine-hydrolyzing) subunit GatD OS=Staphylococcus epidermidis (strain ATCC 35984 / RP62A) OX=176279 GN=gatD PE=3 SV=1	gatD	27.177	72.2	13	13	38	0.982	1.017	1.046	1.032	0.98	0.95	1.063	0.0105287
D4FM49	Uncharacterized protein OS=Staphylococcus epidermidis M23864:W2(grey) OX=525375 GN=HMPREF0794_1637 PE=4 SV=1	HMPREF0794_1637	11.917	10	1	1	1
A0A0H2WXE9	Gluconokinase OS=Staphylococcus aureus (strain COL) OX=93062 GN=gntK PE=3 SV=1	gntK	58.094	4.3	3	2	3	1.059	0.935	0.929	0.975	1.099	1.047	0.886	0.00451343
Q5HPQ4	Uncharacterized protein OS=Staphylococcus epidermidis (strain ATCC 35984 / RP62A) OX=176279 GN=SERP0854 PE=4 SV=1	SERP0854	7.9939	94.4	9	1	39	1.03	1.012	0.975	0.92	1.023	1.041	0.94	0.0888548
A0A7H5C4X3	Beta-class phenol-soluble modulin OS=Staphylococcus epidermidis OX=1282 GN=F9B71_12500 PE=3 SV=1	F9B71_12500	5.1308	78.4	2	2	7	1.274	0.847	0.747	0.802	1.227	1.198	0.648	0.000426486
A0A5R1C2K5	Nitric oxide synthase oxygenase OS=Staphylococcus epidermidis OX=1282 GN=E1N04_08630 PE=3 SV=1	E1N04_08630	41.514	42.3	13	2	21	1.083	0.966	0.976	0.904	1.07	1.042	0.891	0.0119827
Q8CSK7	UPF0346 protein SE_1114 OS=Staphylococcus epidermidis (strain ATCC 12228 / FDA PCI 1200) OX=176280 GN=SE_1114 PE=3 SV=1	SE_1114	8.9959	20.3	1	1	3	1.096	0.953	0.91	0.98	1.046	1.07	0.885	0.00863104
A0A7I0AY83	ABC transporter ATP-binding protein OS=Staphylococcus epidermidis OX=1282 GN=E1M98_11045 PE=4 SV=1	E1M98_11045	31.902	52.9	11	8	26	0.964	1.033	1.102	1.008	0.984	0.951	1.084	0.0475535
A0A7H5C9C2	3'-5' exonuclease DinG OS=Staphylococcus epidermidis OX=1282 GN=dinG PE=3 SV=1	dinG	105.37	19.1	16	1	24	1.08	1.001	0.98	0.938	1.022	1.013	0.937	0.0790388
D4FIW0	Oligoendopeptidase F OS=Staphylococcus epidermidis M23864:W2(grey) OX=525375 GN=pepF PE=3 SV=1	pepF	69.695	36	19	3	41	1.014	1.043	1.002	1.001	0.988	1.021	1.008	0.679153
A0A0E1V9N9	Uncharacterized protein OS=Staphylococcus epidermidis W23144 OX=525376 GN=HMPREF0791_2377 PE=4 SV=1	HMPREF0791_2377	147.37	2.1	3	2	3
Q8CTB2	Methionine import ATP-binding protein MetN 1 OS=Staphylococcus epidermidis (strain ATCC 12228 / FDA PCI 1200) OX=176280 GN=metN1 PE=3 SV=1	metN1	38.441	7.6	2	2	4	0.832	1.066	1.182	1.143	0.859	0.87	1.324	0.00108229
Q8CQ82	Elongation factor G OS=Staphylococcus epidermidis (strain ATCC 12228 / FDA PCI 1200) OX=176280 GN=fusA PE=3 SV=3	fusA	76.876	76.8	42	22	459	0.981	1.016	1.018	1.023	0.974	0.975	1.043	0.00015036
Q5HPN4	Uncharacterized protein OS=Staphylococcus epidermidis (strain ATCC 35984 / RP62A) OX=176279 GN=SERP0874 PE=4 SV=1	SERP0874	45.795	29.1	10	10	22	0.979	1.003	1.061	1.025	0.989	0.981	1.047	0.0504112
Q8CTT1	50S ribosomal protein L7/L12 OS=Staphylococcus epidermidis (strain ATCC 12228 / FDA PCI 1200) OX=176280 GN=rplL PE=3 SV=1	rplL	12.65	80.3	9	3	158	0.979	1.028	1.06	1.039	0.952	0.98	1.074	0.0054149
Q8CNR1	Fumarate hydratase class II OS=Staphylococcus epidermidis (strain ATCC 12228 / FDA PCI 1200) OX=176280 GN=fumC PE=3 SV=1	fumC	51.329	49.7	18	18	51	1.066	0.945	0.936	0.931	1.053	1.05	0.887	4.75194e-05
A0A7G9EFT4	Coproheme III oxidative decarboxylase OS=Staphylococcus epidermidis OX=1282 GN=ATM22_10640 PE=3 SV=1	ATM22_10640	29.555	55	13	13	79	1.071	0.967	0.939	0.963	1.036	1.039	0.912	0.00279153
A0A7H5C766	Assimilatory sulfite reductase (NADPH) flavoprotein subunit OS=Staphylococcus epidermidis OX=1282 GN=F9B71_07405 PE=4 SV=1	F9B71_07405	69.987	39.6	17	1	38	0.995	1.035	1.026	1.003	0.974	0.979	1.039	0.0274047
A0A0N1ENW6	UPF0741 protein E1M98_07295 OS=Staphylococcus epidermidis OX=1282 GN=ATM22_10610 PE=3 SV=1	ATM22_10610	55.692	30.5	14	5	32	1.026	0.973	1.006	0.942	1.042	1.027	0.944	0.0413274
Q8CRJ3	Galactose-6-phosphate isomerase subunit LacB OS=Staphylococcus epidermidis (strain ATCC 12228 / FDA PCI 1200) OX=176280 GN=lacB PE=3 SV=1	lacB	18.903	31	4	4	5	1.053	1.052	0.976	0.956	0.931	1.076	0.975	0.677747
Q8CRU2	Aspartyl/glutamyl-tRNA(Asn/Gln) amidotransferase subunit C OS=Staphylococcus epidermidis (strain ATCC 12228 / FDA PCI 1200) OX=176280 GN=gatC PE=3 SV=1	gatC	11.182	94	9	9	77	0.989	0.997	0.985	0.993	1.034	1.006	0.982	0.255284
Q8CRV9	Regulatory protein RecX OS=Staphylococcus epidermidis (strain ATCC 12228 / FDA PCI 1200) OX=176280 GN=recX PE=3 SV=1	recX	31.684	26.6	5	5	11	1.054	0.993	0.952	1.082	0.97	0.98	1.008	0.887834
A0A7I0BT71	Polyprenyl synthetase family protein (Fragment) OS=Staphylococcus epidermidis OX=1282 GN=E1M98_10480 PE=3 SV=1	E1M98_10480	32.725	44.9	11	11	26	1.01	0.99	0.978	1.003	1.004	0.998	0.986	0.163421
Q5HID2	DNA-directed RNA polymerase subunit beta' OS=Staphylococcus aureus (strain COL) OX=93062 GN=rpoC PE=3 SV=1	rpoC	135.41	50.9	58	2	234	0.895	1.026	1.001	0.982	1.025	1.083	1.002	0.935479
A0A7I0ANA3	Aldo/keto reductase OS=Staphylococcus epidermidis OX=1282 GN=E1N03_02620 PE=4 SV=1	E1N03_02620	32.443	47.7	10	1	19	1.128	0.833	0.861	1.065	1.151	1.025	0.835	0.0947262
A0A7G9EFZ9	Protein-arginine kinase OS=Staphylococcus epidermidis OX=1282 GN=mcsB PE=3 SV=1	mcsB	38.347	40.1	9	1	20
Q8CSM6	Uncharacterized hydrolase SE_1078 OS=Staphylococcus epidermidis (strain ATCC 12228 / FDA PCI 1200) OX=176280 GN=SE_1078 PE=3 SV=1	SE_1078	43.622	6.3	2	2	2	0.963	1.068	1.042	1.064	0.963	0.905	1.121	0.0065336
A0A0E1VDU3	G6PD_C domain-containing protein OS=Staphylococcus epidermidis W23144 OX=525376 GN=HMPREF0791_0828 PE=4 SV=1	HMPREF0791_0828	90.877	10.7	6	1	6	1.135	0.893	0.904	0.958	1.117	1.049	0.835	0.00504954
Q5HLP6	Uncharacterized protein OS=Staphylococcus epidermidis (strain ATCC 35984 / RP62A) OX=176279 GN=SERP1939 PE=4 SV=1	SERP1939	18.769	7.6	1	1	1
Q5HNM2	Amino acid permease family protein OS=Staphylococcus epidermidis (strain ATCC 35984 / RP62A) OX=176279 GN=SERP1245 PE=4 SV=1	SERP1245	143.76	2.3	2	1	2	0.874	0.943	1.176	1.184	0.931	0.882	1.229	0.0597742
A0A0E1VDH0	UPF0637 protein HMPREF0791_0937 OS=Staphylococcus epidermidis W23144 OX=525376 GN=HMPREF0791_0937 PE=3 SV=1	HMPREF0791_0937	47.314	25.3	12	2	31	1.017	0.987	1.065	0.993	0.925	0.96	1.049	0.260245
Q8CST0	Ribonuclease J 2 OS=Staphylococcus epidermidis (strain ATCC 12228 / FDA PCI 1200) OX=176280 GN=rnj2 PE=1 SV=2	rnj2	62.676	40.4	24	24	83	0.985	1.007	1.008	1.037	0.982	1.002	1.028	0.0747427
Q5HQG3	GTP pyrophosphokinase OS=Staphylococcus epidermidis (strain ATCC 35984 / RP62A) OX=176279 GN=relA-1 PE=4 SV=1	relA-1	25.046	54	9	9	36	1.018	0.974	0.946	0.98	1.062	1.044	0.928	0.0105867
Q8CPL4	UvrABC system protein C OS=Staphylococcus epidermidis (strain ATCC 12228 / FDA PCI 1200) OX=176280 GN=uvrC PE=3 SV=2	uvrC	68.837	23.4	11	11	15	0.92	1.062	1.18	1.06	0.908	0.89	1.215	0.00622265
A0A7I0A7P9	Aminotransferase class I/II-fold pyridoxal phosphate-dependent enzyme OS=Staphylococcus epidermidis OX=1282 GN=E1N12_06790 PE=3 SV=1	E1N12_06790	48.766	52.1	17	4	65	1.065	0.951	0.952	0.946	1.069	1.048	0.895	6.56947e-05
Q5HLI1	Uncharacterized protein OS=Staphylococcus epidermidis (strain ATCC 35984 / RP62A) OX=176279 GN=SERP2006 PE=4 SV=1	SERP2006	56.328	37.9	16	1	49	1.028	0.948	1.016	0.912	1.074	1.056	0.911	0.0502881
A0A7T9WTA2	Uncharacterized protein OS=Staphylococcus epidermidis OX=1282 GN=I6I40_02550 PE=4 SV=1	I6I40_02550	21.686	10.8	2	2	2
Q5HQA6	N5-carboxyaminoimidazole ribonucleotide mutase OS=Staphylococcus epidermidis (strain ATCC 35984 / RP62A) OX=176279 GN=purE PE=3 SV=1	purE	17.146	20.6	2	2	5	0.974	0.977	0.979	1.01	0.957	1.055	0.993	0.861446
A0A7G9EB00	Esterase OS=Staphylococcus epidermidis OX=1282 GN=ATM22_01760 PE=4 SV=1	ATM22_01760	37.543	20.9	7	2	21	1.031	1.009	0.949	0.986	1.009	0.971	0.978	0.419414
Q5HNG1	APH domain-containing protein OS=Staphylococcus epidermidis (strain ATCC 35984 / RP62A) OX=176279 GN=SERP1308 PE=4 SV=1	SERP1308	30.776	20.5	4	4	6	0.954	1.062	1.024	1.001	0.931	1.018	1.063	0.123062
Q5HMG5	TsaD domain-containing protein OS=Staphylococcus epidermidis (strain ATCC 35984 / RP62A) OX=176279 GN=SERP1663 PE=4 SV=1	SERP1663	24.902	39.1	7	3	17	1.004	1.046	0.956	1.073	0.956	1.018	1.033	0.47764
Q5HQ02	YlmG protein OS=Staphylococcus epidermidis (strain ATCC 35984 / RP62A) OX=176279 GN=ylmG PE=3 SV=1	ylmG	65.391	3.4	2	1	3	0.991	0.999	0.952	1.005	1.093	0.993	0.961	0.342697
Q5HL55	Copper chaperone CopZ OS=Staphylococcus epidermidis (strain ATCC 35984 / RP62A) OX=176279 GN=copZ PE=3 SV=1	copZ	7.6605	89.7	6	1	115	0.7	1.164	1.41	0.926	0.826	0.866	1.463	0.0546767
A0A0H2VJ46	Mobilization protein OS=Staphylococcus epidermidis (strain ATCC 12228 / FDA PCI 1200) OX=176280 GN=SE_p205 PE=4 SV=1	SE_p205	14.696	61.4	7	2	25	0.986	1.02	0.998	1.011	0.955	0.977	1.038	0.0306312
A0A0E1VET6	DUF2179 domain-containing protein OS=Staphylococcus epidermidis W23144 OX=525376 GN=HMPREF0791_0535 PE=4 SV=1	HMPREF0791_0535	126.22	23	22	3	59	0.714	1.122	1.501	1.014	0.753	0.834	1.581	0.0241194
A0A1N7TAW4	Sortase A (Fragment) OS=Staphylococcus epidermidis OX=1282 PE=4 SV=1	--	20.99	36.8	6	1	9
A0A7T9WQP1	RNA polymerase subunit sigma-70 OS=Staphylococcus epidermidis OX=1282 GN=I6I40_06430 PE=4 SV=1	I6I40_06430	19.141	6.7	1	1	1	1.066	1.002	1.009	0.947	0.998	1.005	0.964	0.273077
A0A2G7HXA9	Signal transduction protein TRAP OS=Staphylococcus epidermidis OX=1282 GN=CP553_03960 PE=3 SV=1	CP553_03960	17.448	44.6	6	3	17	1.085	0.971	0.947	0.906	1.074	1.036	0.884	0.007389
Q8CNZ7	GTPase Obg OS=Staphylococcus epidermidis (strain ATCC 12228 / FDA PCI 1200) OX=176280 GN=obg PE=3 SV=1	obg	47.276	71.6	25	25	70	0.991	0.987	1.004	1.021	0.998	0.995	1.009	0.406857
A0A0H2WVX4	Homoserine dehydrogenase OS=Staphylococcus aureus (strain COL) OX=93062 GN=hom PE=3 SV=1	hom	46.873	3.5	1	1	1	1.018	1.079	0.916	0.991	0.989	1.029	0.984	0.720738
Q5HP57	Pseudouridine synthase OS=Staphylococcus epidermidis (strain ATCC 35984 / RP62A) OX=176279 GN=rluB PE=3 SV=1	rluB	28.273	60.4	16	16	53	0.958	1.028	1.053	0.978	0.967	0.969	1.057	0.06714
A0A0H2VHC9	Transporter OS=Staphylococcus epidermidis (strain ATCC 12228 / FDA PCI 1200) OX=176280 GN=SE_1568 PE=4 SV=1	SE_1568	44.153	15.8	6	1	10
Q8CPP8	Probable quinol oxidase subunit 3 OS=Staphylococcus epidermidis (strain ATCC 12228 / FDA PCI 1200) OX=176280 GN=qoxC PE=3 SV=1	qoxC	22.727	13.9	4	4	14	1.01	0.989	0.968	0.923	1.058	1.001	0.938	0.0753274
Q5HFI7	UPF0365 protein SACOL1630 OS=Staphylococcus aureus (strain COL) OX=93062 GN=SACOL1630 PE=3 SV=1	SACOL1630	35.181	36.5	9	1	50
Q9XB85	Dihydroneopterin aldolase OS=Staphylococcus aureus OX=1280 GN=pspE_1 PE=3 SV=1	pspE_1	39.758	4.2	1	1	1	1.064	0.951	0.902	0.969	1.112	1.047	0.876	0.00897768
Q5HMD4	Uncharacterized protein OS=Staphylococcus epidermidis (strain ATCC 35984 / RP62A) OX=176279 GN=SERP1694 PE=4 SV=1	SERP1694	11.071	45.4	3	1	10	1.05	0.995	0.982	0.977	1	1.024	0.961	0.058434
Q8CPC5	Nuclease SbcCD subunit C OS=Staphylococcus epidermidis (strain ATCC 12228 / FDA PCI 1200) OX=176280 GN=sbcC PE=3 SV=1	sbcC	118.63	36.6	39	13	62	1.016	0.94	0.948	1.026	1.028	1.016	0.952	0.152498
Q8CQ78	Probable branched-chain-amino-acid aminotransferase OS=Staphylococcus epidermidis (strain ATCC 12228 / FDA PCI 1200) OX=176280 GN=ilvE PE=3 SV=1	ilvE	40.195	77.7	23	23	83	1.043	0.95	0.948	0.967	1.054	1.046	0.912	0.000191389
D4FN48	Uncharacterized protein OS=Staphylococcus epidermidis M23864:W2(grey) OX=525375 GN=HMPREF0794_1986 PE=4 SV=1	HMPREF0794_1986	55.538	13.9	11	2	48
Q8CSP3	UPF0154 protein SE_1026 OS=Staphylococcus epidermidis (strain ATCC 12228 / FDA PCI 1200) OX=176280 GN=SE_1026 PE=3 SV=1	SE_1026	8.7509	28	3	3	6	0.962	1.025	1.044	1.006	0.993	0.962	1.054	0.0247595
Q5HFY8	Extracellular matrix-binding protein ebh OS=Staphylococcus aureus (strain COL) OX=93062 GN=ebh PE=3 SV=1	ebh	1131.3	0.4	3	3	13	0.852	1.11	1.1	0.877	0.964	1.011	1.092	0.410879
Q5HQZ3	Transferrin receptor OS=Staphylococcus epidermidis (strain ATCC 35984 / RP62A) OX=176279 GN=SERP0403 PE=4 SV=1	SERP0403	38.433	50.1	18	18	41	0.699	1.291	1.278	1.27	0.68	0.706	1.841	9.52874e-07
Q5HPI9	Thioesterase family protein OS=Staphylococcus epidermidis (strain ATCC 35984 / RP62A) OX=176279 GN=SERP0922 PE=3 SV=1	SERP0922	18.264	54.8	7	1	24	1.215	0.853	1.104	0.85	1.2	0.802	0.873	0.478014
Q8CTD5	Triosephosphate isomerase OS=Staphylococcus epidermidis (strain ATCC 12228 / FDA PCI 1200) OX=176280 GN=tpiA PE=3 SV=1	tpiA	27.367	92.5	24	2	354	0.993	1.04	1.016	0.969	0.98	0.97	1.028	0.283258
Q5HQQ2	FeS assembly ATPase SufC OS=Staphylococcus epidermidis (strain ATCC 35984 / RP62A) OX=176279 GN=sufC PE=3 SV=1	sufC	165.76	14.5	21	1	94	0.827	1.049	1.058	0.993	0.99	1.081	1.07	0.419331
Q5HL65	Hydroxymethylglutaryl-CoA synthase OS=Staphylococcus epidermidis (strain ATCC 35984 / RP62A) OX=176279 GN=SERP2122 PE=3 SV=1	SERP2122	131.32	23.4	23	23	85	1.003	1.007	0.996	1.042	0.985	0.967	1.03	0.157002
Q8CQE8	Probable malate:quinone oxidoreductase 3 OS=Staphylococcus epidermidis (strain ATCC 12228 / FDA PCI 1200) OX=176280 GN=mqo3 PE=3 SV=2	mqo3	55.608	46.8	25	25	92	0.959	1.042	1.028	1.059	0.96	0.959	1.087	0.000627221
A0A7I0ABL0	Uncharacterized protein (Fragment) OS=Staphylococcus epidermidis OX=1282 GN=E1N10_10995 PE=4 SV=1	E1N10_10995	20.901	14	3	3	6	1.102	0.96	0.87	0.942	1.035	1.093	0.858	0.0130502
D4FIV8	Phosphate import ATP-binding protein PstB OS=Staphylococcus epidermidis M23864:W2(grey) OX=525375 GN=pstB PE=3 SV=1	pstB	61.119	28.3	12	12	51	1.059	0.959	0.956	0.964	1.022	1.062	0.916	0.00224318
Q8CP68	3-dehydroquinate synthase OS=Staphylococcus epidermidis (strain ATCC 12228 / FDA PCI 1200) OX=176280 GN=aroB PE=3 SV=1	aroB	40.554	36.7	11	11	18	1.104	0.916	0.855	1.043	1.025	1.061	0.882	0.107521
Q8CNK2	Thiamine-phosphate synthase OS=Staphylococcus epidermidis (strain ATCC 12228 / FDA PCI 1200) OX=176280 GN=thiE PE=3 SV=1	thiE	23.621	46.7	6	6	7	1.18	0.808	0.732	1.066	1.202	1.09	0.751	0.0621295
Q5HLC8	Gluconate operon transcriptional repressor OS=Staphylococcus epidermidis (strain ATCC 35984 / RP62A) OX=176279 GN=gntR PE=4 SV=1	gntR	26.495	19	3	1	5
A0A0E1VB53	Mannosyl-glycoprotein endo-beta-N-acetylglucosaminidase OS=Staphylococcus epidermidis W23144 OX=525376 GN=HMPREF0791_2417 PE=3 SV=1	HMPREF0791_2417	29.008	11.6	3	1	5
Q8CPW0	D-alanyl carrier protein OS=Staphylococcus epidermidis (strain ATCC 12228 / FDA PCI 1200) OX=176280 GN=dltC PE=3 SV=1	dltC	9.0631	33.3	2	2	16	1.128	0.925	0.88	0.898	1.107	1.134	0.802	0.000169869
A0A7T9WSQ4	Alpha/beta hydrolase OS=Staphylococcus epidermidis OX=1282 GN=I6I40_00415 PE=4 SV=1	I6I40_00415	30.361	38.5	9	2	32	1.129	0.916	0.934	0.948	1.05	1.084	0.857	0.00272427
A0A0H2VFS9	DUF4064 domain-containing protein OS=Staphylococcus epidermidis (strain ATCC 12228 / FDA PCI 1200) OX=176280 GN=SE_0802 PE=4 SV=1	SE_0802	15.142	18.5	2	1	8	0.814	1.032	1.049	1.119	0.84	0.834	1.286	0.000689413
A0A509LVP3	CamS family sex pheromone protein OS=Staphylococcus epidermidis OX=1282 GN=D9V05_10135 PE=4 SV=1	D9V05_10135	45.883	62.4	22	22	51	1.012	0.994	0.979	1.042	1.006	1.015	0.994	0.75633
D4FLD3	Dehydrogenase E1 component OS=Staphylococcus epidermidis M23864:W2(grey) OX=525375 GN=acoA PE=4 SV=1	acoA	34.786	48.6	17	1	31	1.261	0.782	0.727	0.885	1.22	1.22	0.647	0.00168387
Q5HMF0	Serine-protein kinase RsbW OS=Staphylococcus epidermidis (strain ATCC 35984 / RP62A) OX=176279 GN=rsbW PE=3 SV=1	rsbW	17.922	68.6	8	8	19	0.948	1.016	1.022	1.015	1.013	0.948	1.05	0.0929234
D4FJL1	Ribosome biogenesis GTPase A OS=Staphylococcus epidermidis M23864:W2(grey) OX=525375 GN=ylqF PE=3 SV=1	ylqF	32.843	44.9	13	13	31	0.973	0.995	1.008	0.996	0.971	1.014	1.014	0.396903
A0A7I0AU25	Accumulation-associated protein (Fragment) OS=Staphylococcus epidermidis OX=1282 GN=E1M98_13350 PE=4 SV=1	E1M98_13350	17.173	86.9	16	1	85	1.033	1.041	0.991	0.921	1.041	1.068	0.94	0.162639
Q8CPJ5	Carbamoyl-phosphate synthase small chain OS=Staphylococcus epidermidis (strain ATCC 12228 / FDA PCI 1200) OX=176280 GN=carA PE=3 SV=1	carA	40.733	39.6	13	1	31	1.236	0.854	0.631	0.912	1.32	1.15	0.647	0.0205672
A0A7I0AMU2	ABC transporter ATP-binding protein OS=Staphylococcus epidermidis OX=1282 GN=E1N03_02850 PE=4 SV=1	E1N03_02850	28.676	45.5	8	1	14
Q5HDX3	50S ribosomal protein L6 OS=Staphylococcus aureus (strain COL) OX=93062 GN=rplF PE=3 SV=1	rplF	19.786	15.2	3	1	5	0.662	1.032	1.288	1.302	0.811	0.85	1.559	0.0145861
A0A0H2VGZ3	Galactosamine-containing minor teichoic acid biosynthesis protein OS=Staphylococcus epidermidis (strain ATCC 12228 / FDA PCI 1200) OX=176280 GN=SE_0170 PE=4 SV=1	SE_0170	89.673	11.5	10	4	12	0.944	1.048	1.087	1.11	0.931	0.894	1.172	0.00248153
Q8CTE3	Nucleotide-binding protein SE_0548 OS=Staphylococcus epidermidis (strain ATCC 12228 / FDA PCI 1200) OX=176280 GN=SE_0548 PE=3 SV=1	SE_0548	34.751	35.4	9	9	29	1.019	0.975	0.96	0.98	1.001	0.973	0.974	0.150837
D4FJQ8	Pseudouridine synthase OS=Staphylococcus epidermidis M23864:W2(grey) OX=525375 GN=rluD PE=3 SV=1	rluD	34.755	51.5	14	14	39	0.987	1.019	1.011	1.026	0.964	0.981	1.042	0.0073556
I0B6L2	RepB family plasmid replication initiator protein OS=Staphylococcus epidermidis OX=1282 GN=rep PE=4 SV=1	rep	34.509	28.4	9	9	20	0.998	1.019	1.045	1.012	1.011	0.973	1.032	0.105255
Q3MQ51	Chloramphenicol/florfenicol exporter OS=Staphylococcus aureus OX=1280 GN=fexA PE=4 SV=1	fexA	49.325	1.5	1	1	2	0.843	1.152	1.22	1.085	0.82	0.846	1.378	0.000822806
Q5HN83	Uncharacterized protein OS=Staphylococcus epidermidis (strain ATCC 35984 / RP62A) OX=176279 GN=SERP1389 PE=4 SV=1	SERP1389	6.9635	54.2	3	3	72	0.983	1.026	1.023	0.977	0.983	1.007	1.018	0.380836
A0A0H2WY13	ATP-dependent zinc metalloprotease FtsH OS=Staphylococcus aureus (strain COL) OX=93062 GN=ftsH PE=3 SV=1	ftsH	77.783	20.7	13	1	42	1.188	0.877	0.781	1.056	1.191	0.98	0.808	0.117521
Q5HPB2	DegV family protein OS=Staphylococcus epidermidis (strain ATCC 35984 / RP62A) OX=176279 GN=SERP1001 PE=4 SV=1	SERP1001	31.226	36.2	7	1	13	1.364	0.802	0.618	0.962	1.274	1.068	0.643	0.0373677
Q8CNZ0	Delta-aminolevulinic acid dehydratase OS=Staphylococcus epidermidis (strain ATCC 12228 / FDA PCI 1200) OX=176280 GN=hemB PE=3 SV=1	hemB	36.569	68.2	20	20	116	0.98	1.013	1.02	1.035	0.997	0.992	1.033	0.0157324
A0A2G7I0J9	Malonyl CoA-acyl carrier protein transacylase OS=Staphylococcus epidermidis OX=1282 GN=fabD PE=3 SV=1	fabD	33.978	66.9	12	5	68	1.065	0.977	0.938	1.01	1.038	1.034	0.932	0.0392449
W5R8R2	Uncharacterized protein OS=Staphylococcus phage phiIBB-SEP1 OX=1340769 GN=SEP1_159 PE=4 SV=1	SEP1_159	23.282	5.2	1	1	1
Q5HG64	DNA topoisomerase 4 subunit A OS=Staphylococcus aureus (strain COL) OX=93062 GN=parC PE=3 SV=1	parC	90.997	4.1	4	1	5	0.928	0.964	1.088	1.105	0.949	0.972	1.108	0.0890571
Q8CNQ3	Monofunctional glycosyltransferase OS=Staphylococcus epidermidis (strain ATCC 12228 / FDA PCI 1200) OX=176280 GN=mgt PE=3 SV=1	mgt	31.392	32	7	7	16	0.99	0.978	0.983	1.014	1.053	1.022	0.971	0.232982
A0A0E1VIT6	Uncharacterized protein OS=Staphylococcus epidermidis W23144 OX=525376 GN=HMPREF0791_2114 PE=4 SV=1	HMPREF0791_2114	223.8	5.3	13	2	33	0.937	1.066	1	1.076	0.974	0.951	1.098	0.0222475
A0A7G9EBB3	NAD(P)H nitroreductase OS=Staphylococcus epidermidis OX=1282 GN=ATM22_02355 PE=4 SV=1	ATM22_02355	23.853	78	16	16	52	1.025	0.978	0.987	0.969	1.013	1.015	0.961	0.00349412
Q5HQF0	Uncharacterized protein OS=Staphylococcus epidermidis (strain ATCC 35984 / RP62A) OX=176279 GN=SERP0603 PE=4 SV=1	SERP0603	29.174	36.3	9	9	12	1.016	1.014	0.982	1.022	1.025	0.964	1.004	0.851559
Q8CQ85	Transcription termination/antitermination protein NusG OS=Staphylococcus epidermidis (strain ATCC 12228 / FDA PCI 1200) OX=176280 GN=nusG PE=3 SV=1	nusG	20.672	57.1	11	11	37	0.992	1.012	1.006	1.006	0.98	1.006	1.015	0.120603
Q5HL42	Uncharacterized protein OS=Staphylococcus epidermidis (strain ATCC 35984 / RP62A) OX=176279 GN=SERP2145 PE=4 SV=1	SERP2145	10.498	33.7	3	3	3	0.991	1.024	1.02	0.968	0.991	1.024	1.002	0.936767
D4FKG1	Uncharacterized protein OS=Staphylococcus epidermidis M23864:W2(grey) OX=525375 GN=HMPREF0794_1049 PE=4 SV=1	HMPREF0794_1049	100.34	36.2	34	5	98	0.984	1.039	1.015	1.042	0.986	0.974	1.052	0.00531135
Q8CTR3	Glucosamine-6-phosphate deaminase OS=Staphylococcus epidermidis (strain ATCC 12228 / FDA PCI 1200) OX=176280 GN=nagB PE=3 SV=1	nagB	27.383	44.9	8	8	10	1.034	1.034	1.002	0.98	0.945	0.946	1.031	0.404933
A0A509LNZ2	DUF536 domain-containing protein OS=Staphylococcus epidermidis OX=1282 GN=D9V05_13645 PE=4 SV=1	D9V05_13645	29.873	42.7	12	6	25	0.955	0.982	1.002	0.945	0.975	0.961	1.013	0.521491
Q8CS67	Acetyl-coenzyme A carboxylase carboxyl transferase subunit alpha OS=Staphylococcus epidermidis (strain ATCC 12228 / FDA PCI 1200) OX=176280 GN=accA PE=3 SV=1	accA	35.155	50	16	16	65	1.003	0.988	1	0.992	1.031	1.032	0.972	0.0469088
Q8CRG4	30S ribosomal protein S19 OS=Staphylococcus epidermidis (strain ATCC 12228 / FDA PCI 1200) OX=176280 GN=rpsS PE=3 SV=1	rpsS	10.559	77.2	11	11	81	0.891	1.064	1.096	1.062	0.883	0.904	1.203	0.000113763
Q5HFV0	DNA-binding protein HU OS=Staphylococcus aureus (strain COL) OX=93062 GN=hup PE=3 SV=1	hup	9.6259	82.2	12	1	310	0.898	1.086	1.176	1.024	0.897	0.906	1.217	0.0084393
Q8CRI0	Adenylate kinase OS=Staphylococcus epidermidis (strain ATCC 12228 / FDA PCI 1200) OX=176280 GN=adk PE=3 SV=1	adk	24.022	67.4	16	2	71	0.909	1.038	1.055	1.083	0.931	0.918	1.152	0.000573803
P0C0Q4	Extracellular elastase OS=Staphylococcus epidermidis (strain ATCC 12228 / FDA PCI 1200) OX=176280 GN=sepA PE=3 SV=1	sepA	55.786	28.2	14	1	18	1.03	1.013	0.992	0.945	0.94	1.098	0.962	0.490066
A0A7T9WQZ1	Replication-associated recombination protein A OS=Staphylococcus epidermidis OX=1282 GN=I6I40_07525 PE=4 SV=1	I6I40_07525	47.161	48.5	18	1	32	0.944	0.991	1.063	0.96	1.043	1.017	1.003	0.941761
Q5HKK1	Phosphoenolpyruvate--glycerone phosphotransferase OS=Staphylococcus epidermidis (strain ATCC 35984 / RP62A) OX=176279 GN=SERP2343 PE=4 SV=1	SERP2343	13.24	33.1	3	3	70	1.148	0.897	0.893	0.896	1.094	1.08	0.809	0.000339134
Q5HQQ5	Uncharacterized protein OS=Staphylococcus epidermidis (strain ATCC 35984 / RP62A) OX=176279 GN=SERP0493 PE=4 SV=1	SERP0493	40.269	13.8	5	1	9	1.028	1.081	0.963	1.038	0.947	0.956	1.052	0.307958
A0A0H2VJ84	Uncharacterized protein OS=Staphylococcus epidermidis (strain ATCC 12228 / FDA PCI 1200) OX=176280 GN=SE_p505 PE=4 SV=1	SE_p505	21.711	23.8	5	5	12	0.918	1.069	1.052	1.125	0.908	0.952	1.168	0.00328986
Q8CQT7	Thymidylate kinase OS=Staphylococcus epidermidis (strain ATCC 12228 / FDA PCI 1200) OX=176280 GN=tmk PE=3 SV=1	tmk	23.13	59.6	13	4	30	1.064	1.03	0.962	1.043	0.942	0.976	1.018	0.698892
A0A0N9S850	Uncharacterized protein OS=Staphylococcus phage SPbeta-like OX=1732063 GN=SPbetalike_00005 PE=4 SV=1	SPbetalike_00005	20.984	4	1	1	1	0.86	1.076	1.194	1.043	0.822	0.978	1.245	0.0290307
Q5HQ66	DUF4064 domain-containing protein OS=Staphylococcus epidermidis (strain ATCC 35984 / RP62A) OX=176279 GN=SERP0690 PE=4 SV=1	SERP0690	45.223	37.9	11	11	37	0.941	1.056	1.049	1.034	0.954	0.978	1.093	0.00233912
Q8CTS8	30S ribosomal protein S12 OS=Staphylococcus epidermidis (strain ATCC 12228 / FDA PCI 1200) OX=176280 GN=rpsL PE=3 SV=1	rpsL	15.344	53.3	6	6	31	1.09	0.92	0.926	0.889	1.09	1.107	0.832	0.000175855
A0A4Q9W5X6	HAD family hydrolase OS=Staphylococcus epidermidis OX=1282 GN=D9V05_04225 PE=4 SV=1	D9V05_04225	30.856	42	8	2	15	1.098	0.944	0.77	1.133	0.969	1.12	0.893	0.364241
A0A7I0AP71	D-lactate dehydrogenase OS=Staphylococcus epidermidis OX=1282 GN=E1N03_00570 PE=3 SV=1	E1N03_00570	36.662	7	3	3	3	1.044	0.964	0.928	0.975	1.038	1.084	0.906	0.00797131
A0A2T4LJ26	Globin OS=Staphylococcus epidermidis OX=1282 GN=CP553_05655 PE=4 SV=1	CP553_05655	14.339	39.7	5	3	6	0.844	1.108	1.128	0.996	0.924	0.985	1.174	0.053364
D4FNG5	Ribonucleoside-diphosphate reductase OS=Staphylococcus epidermidis M23864:W2(grey) OX=525375 GN=nrdE PE=3 SV=1	nrdE	79.849	54.6	31	21	119	0.998	1.025	1.022	1.051	0.964	0.962	1.06	0.017626
D4FIT6	Uncharacterized protein OS=Staphylococcus epidermidis M23864:W2(grey) OX=525375 GN=HMPREF0794_0587 PE=4 SV=1	HMPREF0794_0587	23.471	4.6	1	1	1
A0A7I0AMK6	Aminodeoxychorismate lyase OS=Staphylococcus epidermidis OX=1282 GN=E1N03_02555 PE=4 SV=1	E1N03_02555	24.134	12.9	2	2	2	0.952	1.01	1.033	1.073	0.915	1.02	1.079	0.101237
Q5HRS4	Orn/Lys/Arg decarboxylase OS=Staphylococcus epidermidis (strain ATCC 35984 / RP62A) OX=176279 GN=SERP0119 PE=3 SV=1	SERP0119	93.673	20	17	4	39	0.908	1.072	1.093	1.072	0.934	0.916	1.174	0.00010996
Q5HM28	Energy-coupling factor transporter ATP-binding protein EcfA2 OS=Staphylococcus epidermidis (strain ATCC 35984 / RP62A) OX=176279 GN=ecfA2 PE=3 SV=1	ecfA2	90.605	39.6	24	1	95
D4FKZ0	Uncharacterized protein OS=Staphylococcus epidermidis M23864:W2(grey) OX=525375 GN=HMPREF0794_1228 PE=4 SV=1	HMPREF0794_1228	34.79	23.5	5	2	6
Q8CTT2	50S ribosomal protein L10 OS=Staphylococcus epidermidis (strain ATCC 12228 / FDA PCI 1200) OX=176280 GN=rplJ PE=3 SV=1	rplJ	17.792	66.9	11	11	77	0.951	1.046	1.035	1.031	0.971	0.954	1.082	0.000533441
D4FJX2	50S ribosomal subunit assembly factor BipA OS=Staphylococcus epidermidis M23864:W2(grey) OX=525375 GN=typA PE=3 SV=1	typA	104.31	33.6	26	25	92	0.976	1.02	1.035	1.025	0.983	0.978	1.049	0.000578106
Q8CS87	50S ribosomal protein L21 OS=Staphylococcus epidermidis (strain ATCC 12228 / FDA PCI 1200) OX=176280 GN=rplU PE=3 SV=1	rplU	11.293	62.7	6	4	39	0.914	1.078	1.1	1.056	0.927	0.922	1.17	0.00022833
Q5HE88	Uracil phosphoribosyltransferase OS=Staphylococcus aureus (strain COL) OX=93062 GN=upp PE=3 SV=1	upp	23.05	36.8	5	1	50
A0A0H2VGS0	Spore cortex protein-like protein OS=Staphylococcus epidermidis (strain ATCC 12228 / FDA PCI 1200) OX=176280 GN=SE_1427 PE=4 SV=1	SE_1427	61.173	4.9	2	2	5	0.918	1.044	1.117	1.128	0.987	0.952	1.151	0.0118388
Q8CN23	Putative NAD(P)H nitroreductase SE_2073 OS=Staphylococcus epidermidis (strain ATCC 12228 / FDA PCI 1200) OX=176280 GN=SE_2073 PE=3 SV=1	SE_2073	25.269	55	10	10	26	1.072	0.902	0.891	0.972	1.064	1.083	0.859	0.00525749
D4FIK6	Sensor protein SrrB OS=Staphylococcus epidermidis M23864:W2(grey) OX=525375 GN=srrB PE=4 SV=1	srrB	95.665	33.2	24	19	53	0.969	1.049	0.996	0.986	0.984	0.988	1.031	0.211798
A0A0H2VL15	RLX protein OS=Staphylococcus epidermidis (strain ATCC 12228 / FDA PCI 1200) OX=176280 GN=SE_p206 PE=4 SV=1	SE_p206	32.832	28.3	7	6	11	1.015	0.988	1.024	1.034	1.015	0.978	1.013	0.537174
A0A7G9EBB7	General stress protein OS=Staphylococcus epidermidis OX=1282 GN=ATM22_02375 PE=4 SV=1	ATM22_02375	16.114	44.3	5	1	15	0.859	1.125	1.178	1.099	0.833	0.877	1.324	0.00037485
Q8CRH4	30S ribosomal protein S8 OS=Staphylococcus epidermidis (strain ATCC 12228 / FDA PCI 1200) OX=176280 GN=rpsH PE=3 SV=1	rpsH	14.825	62.1	10	1	66	0.643	1.254	1.506	1.011	0.762	0.799	1.711	0.0164009
Q8CPH4	Succinate--CoA ligase [ADP-forming] subunit alpha OS=Staphylococcus epidermidis (strain ATCC 12228 / FDA PCI 1200) OX=176280 GN=sucD PE=3 SV=1	sucD	31.699	65.6	12	12	62	1.029	0.988	0.94	0.994	1.028	1.014	0.951	0.0524179
Q8CNI2	CTP synthase OS=Staphylococcus epidermidis (strain ATCC 12228 / FDA PCI 1200) OX=176280 GN=pyrG PE=3 SV=1	pyrG	60.211	50.8	20	20	82	1.019	0.956	0.945	0.972	1.038	1.037	0.929	0.00186335
Q5HN98	Uncharacterized protein OS=Staphylococcus epidermidis (strain ATCC 35984 / RP62A) OX=176279 GN=SERP1374 PE=4 SV=1	SERP1374	13.603	69.9	7	7	32	1.022	1.022	0.996	0.984	0.974	1.028	0.993	0.744377
A0A7I0AKZ9	UDPGP type 1 family protein OS=Staphylococcus epidermidis OX=1282 GN=E1N03_06215 PE=3 SV=1	E1N03_06215	45.745	58.5	22	1	86	1.019	1.051	0.972	1.014	0.963	0.99	1.022	0.48543
Q5HMQ6	Uncharacterized protein OS=Staphylococcus epidermidis (strain ATCC 35984 / RP62A) OX=176279 GN=SERP1572 PE=4 SV=1	SERP1572	9.5737	8	1	1	3
Q8CTF5	Uncharacterized membrane protein SE_0528 OS=Staphylococcus epidermidis (strain ATCC 12228 / FDA PCI 1200) OX=176280 GN=SE_0528 PE=4 SV=1	SE_0528	40.591	5.3	2	2	2	1.082	0.966	1.025	0.974	0.966	1.013	0.969	0.455927
A0A6N4IX11	5-oxoprolinase subunit PxpB (Fragment) OS=Staphylococcus epidermidis OX=1282 GN=pxpB PE=4 SV=1	pxpB	26.612	26	3	3	3	0.965	1.064	0.983	0.959	0.954	1.032	1.019	0.673042
D4FIQ3	Uncharacterized protein OS=Staphylococcus epidermidis M23864:W2(grey) OX=525375 GN=HMPREF0794_0554 PE=3 SV=1	HMPREF0794_0554	16.327	41.1	7	7	27	1.003	1.006	0.971	0.979	1.025	1.016	0.971	0.0769586
Q5HKC4	Uncharacterized protein OS=Staphylococcus epidermidis (strain ATCC 35984 / RP62A) OX=176279 GN=SERP2424 PE=4 SV=1	SERP2424	4.8975	38.1	1	1	1	0.909	1.108	1.048	1.032	0.94	0.96	1.135	0.00921486
A0A7T9WR71	16S rRNA (Uracil(1498)-N(3))-methyltransferase OS=Staphylococcus epidermidis OX=1282 GN=I6I40_07750 PE=4 SV=1	I6I40_07750	112.65	16.7	14	8	25	1.014	1.01	0.959	1.057	1.003	0.991	1.006	0.865318
Q8CQV3	tRNA(Ile)-lysidine synthase OS=Staphylococcus epidermidis (strain ATCC 12228 / FDA PCI 1200) OX=176280 GN=tilS PE=3 SV=1	tilS	51.26	32.2	9	9	12	1.004	0.978	0.94	1.052	1.005	1.006	0.985	0.650309
Q5HQN5	Uncharacterized protein OS=Staphylococcus epidermidis (strain ATCC 35984 / RP62A) OX=176279 GN=SERP0513 PE=4 SV=1	SERP0513	10.237	28.4	2	2	4	0.921	1.12	1.031	1.154	0.847	0.754	1.31	0.0153092
Q5HNZ5	Superoxide dismutase [Mn/Fe] OS=Staphylococcus epidermidis (strain ATCC 35984 / RP62A) OX=176279 GN=sodA PE=3 SV=1	sodA	22.722	77.4	16	9	154	1	0.988	0.976	1.011	1.03	1.01	0.979	0.183967
A0A0H2WYD3	YycH protein OS=Staphylococcus aureus (strain COL) OX=93062 GN=yycH PE=4 SV=1	yycH	50.924	3.8	2	1	2
A0A0H2WZH3	Threonylcarbamoyl-AMP synthase OS=Staphylococcus aureus (strain COL) OX=93062 GN=SACOL2108 PE=3 SV=1	SACOL2108	133.73	2.2	3	2	3	0.98	0.944	0.913	0.974	1.099	1.126	0.883	0.058509
D3JCW0	Cassette chromosome recombinase B1 OS=Staphylococcus aureus OX=1280 GN=ccrB1 PE=4 SV=1	ccrB1	62.401	1.8	1	1	1	1.165	0.902	0.916	0.833	1.099	1.146	0.777	0.00179288
A0A7H5C7L8	Cys-tRNA(Pro)/Cys-tRNA(Cys) deacylase OS=Staphylococcus epidermidis OX=1282 GN=ybaK PE=3 SV=1	ybaK	18.11	49.4	8	8	22	0.977	1.018	1.078	0.986	0.991	0.978	1.046	0.168576
Q8CP85	Uncharacterized protein SE_1092 OS=Staphylococcus epidermidis (strain ATCC 12228 / FDA PCI 1200) OX=176280 GN=SE_1092 PE=3 SV=1	SE_1092	29.535	65	12	12	24	0.984	1.056	1.048	1.018	0.956	0.972	1.072	0.00755951
A0A7I0BIQ0	ATP-binding cassette domain-containing protein OS=Staphylococcus epidermidis OX=1282 GN=E1N03_02475 PE=4 SV=1	E1N03_02475	25.682	7.8	2	1	3
Q5HCV5	Aspartate 1-decarboxylase OS=Staphylococcus aureus (strain COL) OX=93062 GN=panD PE=3 SV=1	panD	14.05	25.2	3	1	13	1.032	0.782	0.647	1.654	0.986	0.927	1.047	0.896582
A0A0H2VIQ7	Uncharacterized protein OS=Staphylococcus epidermidis (strain ATCC 12228 / FDA PCI 1200) OX=176280 GN=SE_p308 PE=4 SV=1	SE_p308	11.846	47.6	2	2	8	0.977	1.028	1.031	1.03	0.969	0.993	1.051	0.00233445
A0A7G9EB99	Nickel ABC transporter substrate-binding protein OS=Staphylococcus epidermidis OX=1282 GN=ATM22_02285 PE=4 SV=1	ATM22_02285	55.517	62.3	28	1	76	1.219	0.839	0.736	1.091	1.154	1.034	0.783	0.110277
A0A0H2VHQ1	Uncharacterized protein OS=Staphylococcus epidermidis (strain ATCC 12228 / FDA PCI 1200) OX=176280 GN=SE_0538 PE=4 SV=1	SE_0538	25.298	60.1	11	1	22	1.111	0.925	0.929	0.957	1.046	1.076	0.869	0.0023958
Q8CNI9	Low molecular weight protein-tyrosine-phosphatase PtpB OS=Staphylococcus epidermidis (strain ATCC 12228 / FDA PCI 1200) OX=176280 GN=ptpB PE=3 SV=1	ptpB	15.709	31.7	5	5	8	0.98	1.017	0.917	0.972	1.081	1.064	0.93	0.164001
Q8CMM6	tRNA pseudouridine synthase B OS=Staphylococcus epidermidis (strain ATCC 12228 / FDA PCI 1200) OX=176280 GN=truB PE=3 SV=1	truB	34.831	31.8	8	8	10	0.895	1.08	1.119	1.017	0.926	0.91	1.178	0.00531364
Q5HRB7	Uncharacterized protein OS=Staphylococcus epidermidis (strain ATCC 35984 / RP62A) OX=176279 GN=SERP0276 PE=4 SV=1	SERP0276	32.398	4	1	1	1	1.347	0.855	0.726	0.793	1.18	1.196	0.638	0.00205782
A0A0E1VHI2	Isochorismatase family protein OS=Staphylococcus epidermidis W23144 OX=525376 GN=HMPREF0791_0281 PE=4 SV=1	HMPREF0791_0281	83.821	46.6	30	5	163	1.15	0.85	0.905	0.953	1.165	1.054	0.804	0.00871798
Q8CQK0	Transcriptional regulatory protein WalR OS=Staphylococcus epidermidis (strain ATCC 12228 / FDA PCI 1200) OX=176280 GN=walR PE=3 SV=1	walR	27.135	72.5	20	20	76	1.052	0.964	0.959	0.952	1.06	1.034	0.914	0.000390436
A0A0H2WWG1	Dihydrolipoyl dehydrogenase OS=Staphylococcus aureus (strain COL) OX=93062 GN=lpdA PE=3 SV=1	lpdA	133.04	0.6	1	1	1
Q8CNJ7	ATP synthase subunit beta OS=Staphylococcus epidermidis (strain ATCC 12228 / FDA PCI 1200) OX=176280 GN=atpD PE=3 SV=1	atpD	51.556	82.6	33	1	220	1.003	0.991	0.942	1.056	0.97	1.056	0.987	0.75525
Q5HLH4	Uncharacterized protein OS=Staphylococcus epidermidis (strain ATCC 35984 / RP62A) OX=176279 GN=SERP2013 PE=4 SV=1	SERP2013	27.715	60.1	18	18	88	1.001	0.965	1.001	0.949	1.033	1.036	0.95	0.0539408
D4FIT3	von Willebrand factor type A domain protein OS=Staphylococcus epidermidis M23864:W2(grey) OX=525375 GN=HMPREF0794_0584 PE=4 SV=1	HMPREF0794_0584	113.28	15.3	14	1	14	0.933	1.078	1.095	0.988	0.967	0.941	1.113	0.0350181
D4FJP5	Guanylate kinase OS=Staphylococcus epidermidis M23864:W2(grey) OX=525375 GN=gmk PE=3 SV=1	gmk	52.883	42.2	14	9	29	1.045	0.972	0.957	1.03	1.002	0.996	0.972	0.354084
D4FN88	Putative hemin transport system permease protein HrtB OS=Staphylococcus epidermidis M23864:W2(grey) OX=525375 GN=HMPREF0794_2026 PE=3 SV=1	HMPREF0794_2026	108.61	7.6	8	6	9	1.109	0.89	0.895	0.964	1.122	1.102	0.825	0.00181903
D4FJM1	Chromosome partition protein Smc OS=Staphylococcus epidermidis M23864:W2(grey) OX=525375 GN=smc PE=3 SV=1	smc	137.49	47.8	53	4	78	0.917	1.022	1.06	1.004	0.981	1.005	1.063	0.12412
Q5HFX7	UPF0398 protein SACOL1485 OS=Staphylococcus aureus (strain COL) OX=93062 GN=SACOL1485 PE=3 SV=1	SACOL1485	22.191	7.5	1	1	1	0.616	1.286	1.564	0.895	0.701	0.855	1.724	0.0493132
Q5HR66	DUF402 domain-containing protein OS=Staphylococcus epidermidis (strain ATCC 35984 / RP62A) OX=176279 GN=SERP0327 PE=4 SV=1	SERP0327	23.697	26.9	5	1	9	1.134	0.9	0.838	1.002	1.155	1.031	0.825	0.0367984
Q8CN55	Sensory transduction protein LytR OS=Staphylococcus epidermidis (strain ATCC 12228 / FDA PCI 1200) OX=176280 GN=lytR PE=3 SV=1	lytR	29.545	13.5	3	3	4	0.897	1.025	1.186	1.048	0.914	0.92	1.193	0.0191543
D4FLW3	DNA-binding helix-turn-helix protein OS=Staphylococcus epidermidis M23864:W2(grey) OX=525375 GN=HMPREF0794_1551 PE=4 SV=1	HMPREF0794_1551	78.145	26.2	18	3	27	0.963	1.067	0.968	1.042	1.036	0.993	1.028	0.487793
A0A0E1VBF9	Thioredoxin domain-containing protein OS=Staphylococcus epidermidis W23144 OX=525376 GN=HMPREF0791_2214 PE=4 SV=1	HMPREF0791_2214	12.665	37	3	1	6	1.068	0.91	0.924	0.894	1.073	1.176	0.822	0.00403702
Q8CSC7	Ribosomal protein L11 methyltransferase OS=Staphylococcus epidermidis (strain ATCC 12228 / FDA PCI 1200) OX=176280 GN=prmA PE=3 SV=1	prmA	35.661	36.5	9	9	33	1.026	0.964	1.014	1.023	1.035	1.021	0.974	0.227509
Q5HNF8	Uncharacterized protein OS=Staphylococcus epidermidis (strain ATCC 35984 / RP62A) OX=176279 GN=SERP1311 PE=4 SV=1	SERP1311	15.938	43.7	9	9	26	0.976	1.032	1.05	1.012	0.997	0.992	1.044	0.0268087
Q5HMF9	2-isopropylmalate synthase OS=Staphylococcus epidermidis (strain ATCC 35984 / RP62A) OX=176279 GN=leuA PE=3 SV=1	leuA	102.94	17.2	13	1	29	1.027	1.028	0.986	0.98	1.049	0.981	0.979	0.452282
A0A7I0A670	SDR family oxidoreductase OS=Staphylococcus epidermidis OX=1282 GN=E1N12_08115 PE=4 SV=1	E1N12_08115	31.717	37.5	10	1	22	1.015	0.908	1.001	1.051	1.064	0.992	0.964	0.467753
A0A0H2VF13	ABC transporter ATP-binding protein OS=Staphylococcus epidermidis (strain ATCC 12228 / FDA PCI 1200) OX=176280 GN=SE_0500 PE=4 SV=1	SE_0500	73.021	36.5	20	1	39
A0A0E1VEV6	Peptidase T-like protein OS=Staphylococcus epidermidis W23144 OX=525376 GN=HMPREF0791_1307 PE=3 SV=1	HMPREF0791_1307	101.52	14.8	11	1	19
Q8CPP4	Bifunctional protein FolD OS=Staphylococcus epidermidis (strain ATCC 12228 / FDA PCI 1200) OX=176280 GN=folD PE=3 SV=1	folD	31.001	75.9	18	1	83	1.148	0.881	0.822	1.02	1.116	1.074	0.816	0.0355593
A0A0E1VHH9	Glutamyl-tRNA(Gln) amidotransferase subunit A OS=Staphylococcus epidermidis W23144 OX=525376 GN=gatA PE=3 SV=1	gatA	52.83	53.2	21	21	137	1.036	0.966	0.954	1.012	1.029	1.014	0.952	0.061062
P0C0P9	Extracellular cysteine protease OS=Staphylococcus epidermidis OX=1282 GN=ecpA PE=1 SV=1	ecpA	19.832	9.8	2	1	2	1.01	1.023	1.201	1.121	0.699	0.922	1.271	0.105844
A0A5R1C4T6	Glucose-6-phosphate isomerase OS=Staphylococcus epidermidis OX=1282 GN=pgi PE=3 SV=1	pgi	49.723	60.9	26	1	144
D4FP49	Uncharacterized protein OS=Staphylococcus epidermidis M23864:W2(grey) OX=525375 GN=HMPREF0794_2337 PE=4 SV=1	HMPREF0794_2337	84.524	12.3	9	9	9	1.088	0.911	0.887	1.012	1.066	1.038	0.88	0.0386122
Q5HHQ4	Thioredoxin reductase OS=Staphylococcus aureus (strain COL) OX=93062 GN=trxB PE=3 SV=1	trxB	33.616	28	6	2	15
Q5HNB2	2-succinylbenzoate--CoA ligase OS=Staphylococcus epidermidis (strain ATCC 35984 / RP62A) OX=176279 GN=menE PE=3 SV=1	menE	53.971	15.8	7	7	9	0.914	1.033	1.06	1.043	0.954	0.961	1.109	0.00401186
A0A0H2WY23	Iron-dependent repressor OS=Staphylococcus aureus (strain COL) OX=93062 GN=sirR PE=3 SV=1	sirR	66.046	5.2	3	1	9
Q8CU42	Carbamate kinase 2 OS=Staphylococcus epidermidis (strain ATCC 12228 / FDA PCI 1200) OX=176280 GN=arcC2 PE=3 SV=1	arcC2	33.157	47.2	14	14	43	1.253	0.815	0.761	0.775	1.235	1.228	0.633	2.79319e-05
Q8CSZ5	Phosphopantetheine adenylyltransferase OS=Staphylococcus epidermidis (strain ATCC 12228 / FDA PCI 1200) OX=176280 GN=coaD PE=3 SV=1	coaD	18.216	38.5	5	5	9	0.878	1.054	1.074	1.006	0.937	0.994	1.116	0.0536724
A0A7I0BEW5	Acetolactate synthase AlsS OS=Staphylococcus epidermidis OX=1282 GN=alsS PE=3 SV=1	alsS	60.918	69.7	29	1	214	1.172	0.864	0.776	1.005	1.162	1.091	0.772	0.0281722
Q8CSX9	Putative cysteine ligase BshC OS=Staphylococcus epidermidis (strain ATCC 12228 / FDA PCI 1200) OX=176280 GN=bshC PE=3 SV=1	bshC	63.648	41.2	18	2	31	0.91	1.03	1.06	0.978	1.016	1.018	1.042	0.392418
A0A7I0B5B8	Peptide methionine sulfoxide reductase MsrA OS=Staphylococcus epidermidis OX=1282 GN=msrA PE=3 SV=1	msrA	19.806	56.1	7	7	11	1.166	0.856	0.75	0.972	1.14	1.013	0.777	0.0415899
Q8CPP1	Phosphoribosylaminoimidazole-succinocarboxamide synthase OS=Staphylococcus epidermidis (strain ATCC 12228 / FDA PCI 1200) OX=176280 GN=purC PE=3 SV=1	purC	26.855	64.5	12	12	22	1.088	0.94	0.905	0.932	1.084	1.093	0.851	0.000159686
U6C447	Arginine deiminase OS=Staphylococcus epidermidis OX=1282 GN=arcA PE=3 SV=1	arcA	47.27	77.4	34	26	115	1.264	0.795	0.786	0.776	1.216	1.243	0.633	4.1618e-06
Q5HN05	Uncharacterized protein OS=Staphylococcus epidermidis (strain ATCC 35984 / RP62A) OX=176279 GN=SERP1469 PE=4 SV=1	SERP1469	40.656	16.5	6	5	9	0.967	0.949	0.99	1.074	0.958	0.992	1.033	0.455763
A0A0H2WXN0	Uncharacterized protein OS=Staphylococcus aureus (strain COL) OX=93062 GN=SACOL0295 PE=4 SV=1	SACOL0295	90.519	1.1	1	1	1
Q8CN30	Thiazole synthase OS=Staphylococcus epidermidis (strain ATCC 12228 / FDA PCI 1200) OX=176280 GN=thiG PE=3 SV=1	thiG	27.344	56.9	8	3	13	0.988	0.971	0.991	1.027	0.985	1.016	1	0.993271
A0A0H2WYX7	NifU domain protein OS=Staphylococcus aureus (strain COL) OX=93062 GN=SACOL0917 PE=4 SV=1	SACOL0917	68.828	13	5	1	21
Q5HRB9	Staphylococcal accessory regulator A OS=Staphylococcus epidermidis (strain ATCC 35984 / RP62A) OX=176279 GN=sarA PE=4 SV=1	sarA	14.731	46.8	7	6	55	1.016	0.952	0.921	1.05	1.046	1.051	0.939	0.189057
Q8CP13	Elongation factor 4 OS=Staphylococcus epidermidis (strain ATCC 12228 / FDA PCI 1200) OX=176280 GN=lepA PE=3 SV=1	lepA	68.274	50.9	24	24	73	0.997	1.008	0.999	1.039	0.999	0.999	1.017	0.232027
Q8CQD2	Diacetyl reductase [(S)-acetoin forming] OS=Staphylococcus epidermidis (strain ATCC 12228 / FDA PCI 1200) OX=176280 GN=butA PE=3 SV=1	butA	27.917	44.4	7	7	28	0.913	1.07	1.086	1.123	0.896	0.91	1.206	0.00026524
Q8CS41	D-alanine aminotransferase OS=Staphylococcus epidermidis (strain ATCC 12228 / FDA PCI 1200) OX=176280 GN=dat PE=3 SV=1	dat	32.163	69.9	13	13	87	0.996	0.996	1.003	1.014	1.005	1.004	1.003	0.679665
Q8CTG7	Putative 5'(3')-deoxyribonucleotidase OS=Staphylococcus epidermidis (strain ATCC 12228 / FDA PCI 1200) OX=176280 GN=SE_0505 PE=1 SV=1	SE_0505	20.993	42.5	7	7	21	0.926	1.057	1.028	1.065	0.974	0.947	1.106	0.00506267
A0A7I0AV46	Uncharacterized protein OS=Staphylococcus epidermidis OX=1282 GN=CP553_00260 PE=4 SV=1	CP553_00260	25.764	53.4	13	1	28	1.037	0.987	0.966	0.942	1.008	1.003	0.95	0.0387658
D4FNS8	4-phosphoerythronate dehydrogenase OS=Staphylococcus epidermidis M23864:W2(grey) OX=525375 GN=pdxB PE=3 SV=1	pdxB	64.705	33.9	17	10	43	1.078	0.93	0.954	0.953	1.084	1.045	0.885	0.000969762
Q8CU87	Sensor protein kinase WalK OS=Staphylococcus epidermidis (strain ATCC 12228 / FDA PCI 1200) OX=176280 GN=walK PE=1 SV=1	walK	69.943	47.9	29	29	51	0.984	1.014	1.044	0.998	0.985	0.992	1.032	0.0795897
D4FM30	Uncharacterized protein OS=Staphylococcus epidermidis M23864:W2(grey) OX=525375 GN=HMPREF0794_1618 PE=4 SV=1	HMPREF0794_1618	10.286	26.1	2	1	6	0.826	1.124	1.006	1.038	0.94	0.94	1.171	0.0433683
Q8CNJ8	ATP synthase epsilon chain OS=Staphylococcus epidermidis (strain ATCC 12228 / FDA PCI 1200) OX=176280 GN=atpC PE=3 SV=1	atpC	14.909	58.2	4	4	32	0.976	1.025	1.014	0.996	0.988	1.014	1.019	0.246807
Q5HLX9	Molybdopterin synthase sulfur carrier subunit OS=Staphylococcus epidermidis (strain ATCC 35984 / RP62A) OX=176279 GN=moaD PE=3 SV=1	moaD	8.815	51.9	4	1	5
A0A7I0AZH9	YhgE/Pip domain-containing protein OS=Staphylococcus epidermidis OX=1282 GN=E1M98_06950 PE=4 SV=1	E1M98_06950	104.9	53.7	44	41	91	0.98	1.021	1.024	1.03	0.981	0.968	1.05	0.000626007
A0A0H2VI16	Alcohol dehydrogenase OS=Staphylococcus epidermidis (strain ATCC 12228 / FDA PCI 1200) OX=176280 GN=SE_2019 PE=3 SV=1	SE_2019	37.698	37.1	8	2	43	1.007	1.042	1.04	0.992	1.01	0.975	1.027	0.242741
A0A0H2VHY0	Nitrite reductase OS=Staphylococcus epidermidis (strain ATCC 12228 / FDA PCI 1200) OX=176280 GN=SE_1978 PE=4 SV=1	SE_1978	89.124	51.9	37	1	96	0.466	1.565	1.474	1.253	0.54	0.566	2.73	0.00034572
D4FJJ2	DNA polymerase III PolC-type OS=Staphylococcus epidermidis M23864:W2(grey) OX=525375 GN=polC PE=3 SV=1	polC	162.78	44.8	56	5	125	0.948	1.027	1.104	1.012	0.918	0.962	1.111	0.0254661
Q5HR17	Urea amidolyase-related protein OS=Staphylococcus epidermidis (strain ATCC 35984 / RP62A) OX=176279 GN=SERP0378 PE=4 SV=1	SERP0378	38.053	34.1	12	12	23	0.97	1.018	1.03	0.991	0.998	1.001	1.024	0.200472
Q5HQN4	Uncharacterized protein OS=Staphylococcus epidermidis (strain ATCC 35984 / RP62A) OX=176279 GN=SERP0514 PE=3 SV=1	SERP0514	16.94	65.3	8	8	33	1.117	0.921	0.93	0.955	1.084	1.064	0.859	0.00105397
A0A7I0AT26	Bacillithiol biosynthesis deacetylase BshB2 OS=Staphylococcus epidermidis OX=1282 GN=bshB2 PE=4 SV=1	bshB2	24.923	52	8	2	13	1.08	0.96	0.876	1.058	1.032	1.032	0.92	0.204796
Q5HK01	S4 RNA-binding domain-containing protein OS=Staphylococcus epidermidis (strain ATCC 35984 / RP62A) OX=176279 GN=SERP2551 PE=4 SV=1	SERP2551	37.889	46.4	14	5	34	1.027	0.985	0.987	0.996	1.05	0.968	0.975	0.36473
A0A0N1ENU1	DUF47 domain-containing protein OS=Staphylococcus epidermidis OX=1282 GN=ATM22_10305 PE=3 SV=1	ATM22_10305	23.778	66.3	12	4	43	0.948	1.069	1.093	0.984	0.907	0.917	1.135	0.022129
Q8CP39	Exodeoxyribonuclease 7 small subunit OS=Staphylococcus epidermidis (strain ATCC 12228 / FDA PCI 1200) OX=176280 GN=xseB PE=3 SV=1	xseB	8.7466	86.8	8	8	49	0.985	1.022	0.994	0.988	1	0.998	1.007	0.577555
Q5HM87	Uncharacterized protein OS=Staphylococcus epidermidis (strain ATCC 35984 / RP62A) OX=176279 GN=SERP1742 PE=4 SV=1	SERP1742	13.252	19.8	3	3	6	1.012	1.065	0.96	1.051	0.978	0.976	1.037	0.363713
D4FKK9	Glycine betaine/L-proline transport ATP binding subunit OS=Staphylococcus epidermidis M23864:W2(grey) OX=525375 GN=proV PE=3 SV=1	proV	47.702	52.2	20	14	48	0.94	1.064	1.079	1.033	0.935	0.96	1.12	0.00170282
Q5HRK1	Ornithine cyclodeaminase/mu-crystallin family protein OS=Staphylococcus epidermidis (strain ATCC 35984 / RP62A) OX=176279 GN=SERP0192 PE=4 SV=1	SERP0192	34.602	28.2	7	7	17	1.051	0.946	0.911	0.972	1.095	1.043	0.887	0.00763508
A0A0E1VE10	Coenzyme A disulfide reductase OS=Staphylococcus epidermidis W23144 OX=525376 GN=cdr PE=3 SV=1	cdr	49.374	25.3	10	2	23	0.762	1.17	1.463	0.928	0.741	0.879	1.495	0.0520487
Q5HPZ2	Uracil permease OS=Staphylococcus epidermidis (strain ATCC 35984 / RP62A) OX=176279 GN=uraA PE=3 SV=1	uraA	46.066	2.3	1	1	1
A0A7G9EEP6	Uncharacterized protein OS=Staphylococcus epidermidis OX=1282 GN=ATM22_08650 PE=4 SV=1	ATM22_08650	20.526	10.2	1	1	1	1.019	0.959	0.963	0.944	1.052	1.096	0.905	0.0105503
A0A0H2WWR2	Nicotinate phosphoribosyltransferase OS=Staphylococcus aureus (strain COL) OX=93062 GN=SACOL1975 PE=3 SV=1	SACOL1975	177.91	6.6	11	1	27	0.975	0.964	0.984	0.968	1.002	1.038	0.967	0.159458
A0A7G9EDX2	Phage tail protein OS=Staphylococcus epidermidis OX=1282 GN=ATM22_07265 PE=4 SV=1	ATM22_07265	27.755	4.4	1	1	1
Q8CMX5	Sulfite reductase [NADPH] hemoprotein beta-component OS=Staphylococcus epidermidis (strain ATCC 12228 / FDA PCI 1200) OX=176280 GN=cysI PE=3 SV=1	cysI	65.356	45.1	18	1	28	1.031	1.022	1.076	1.028	1.011	0.85	1.081	0.269805
Q5HL80	CapB protein OS=Staphylococcus epidermidis (strain ATCC 35984 / RP62A) OX=176279 GN=capB PE=4 SV=1	capB	43.543	12.5	3	3	3	0.894	1.106	1.067	1.043	0.95	0.934	1.158	0.00416471
Q5HRU7	Trans-sulfuration enzyme family protein OS=Staphylococcus epidermidis (strain ATCC 35984 / RP62A) OX=176279 GN=SERP0095 PE=3 SV=1	SERP0095	41.862	24.4	7	7	15	0.889	1.137	1.108	1.103	0.886	0.851	1.275	0.000136616
A0A0E1VD10	DNA gyrase subunit A OS=Staphylococcus epidermidis W23144 OX=525376 GN=gyrA PE=3 SV=1	gyrA	100.12	45.1	40	35	99	0.994	1.006	1.017	1.045	0.992	0.98	1.034	0.0500962
A0A509LWI3	DNA polymerase III subunit alpha OS=Staphylococcus epidermidis OX=1282 GN=dnaE PE=3 SV=1	dnaE	168.78	31	40	31	68	1.011	0.993	1.01	1.001	0.982	1.015	0.999	0.91903
D4FNE4	Chorismate binding enzyme OS=Staphylococcus epidermidis M23864:W2(grey) OX=525375 GN=HMPREF0794_2082 PE=4 SV=1	HMPREF0794_2082	44.14	10.4	3	3	4
A0A7I0A5J9	Nickel-dependent lactate racemase OS=Staphylococcus epidermidis OX=1282 GN=larA PE=4 SV=1	larA	47.372	36.7	11	11	19	1.038	1.004	0.961	1.047	1.009	1.011	0.985	0.584066
Q5HQJ4	ATP-dependent helicase/nuclease subunit A OS=Staphylococcus epidermidis (strain ATCC 35984 / RP62A) OX=176279 GN=addA PE=3 SV=1	addA	142.37	36	39	7	66	1.061	1.004	0.938	0.999	1.052	1	0.945	0.117566
Q5HQG0	Magnesium transporter MgtE OS=Staphylococcus epidermidis (strain ATCC 35984 / RP62A) OX=176279 GN=mgtE PE=3 SV=1	mgtE	51.195	23.6	9	9	17	1.022	0.987	0.974	0.976	1.037	1.038	0.948	0.00122694
Q5HM80	Uncharacterized protein OS=Staphylococcus epidermidis (strain ATCC 35984 / RP62A) OX=176279 GN=SERP1749 PE=4 SV=1	SERP1749	48.596	17.8	8	4	19	0.986	1.014	1.023	1.084	0.97	0.966	1.068	0.040062
E5FXQ7	Translation elongation factor Tu (Fragment) OS=Staphylococcus epidermidis OX=1282 GN=tuf PE=4 SV=1	tuf	20.237	92.9	18	1	266	0.904	1.1	1.118	1.016	0.949	0.909	1.171	0.0091885
D4FL03	Anaerobic ribonucleoside-triphosphate reductase-activating protein OS=Staphylococcus epidermidis M23864:W2(grey) OX=525375 GN=nrdG PE=3 SV=1	nrdG	20.631	15.2	3	3	6	0.987	1.048	1.066	1.012	0.994	0.949	1.067	0.0369519
Q5HQY0	DegV family protein OS=Staphylococcus epidermidis (strain ATCC 35984 / RP62A) OX=176279 GN=SERP0416 PE=4 SV=1	SERP0416	32.195	26.7	5	1	11	0.968	1.005	1.047	1.002	0.971	0.977	1.047	0.0331894
Q5HNV8	ComE operon protein 2 OS=Staphylococcus epidermidis (strain ATCC 35984 / RP62A) OX=176279 GN=SERP1156 PE=3 SV=1	SERP1156	17.183	73.9	7	7	18	1.056	0.96	0.929	0.952	1.018	1.056	0.908	0.00350234
D4FJY8	Pyruvate dehydrogenase E1 component subunit alpha OS=Staphylococcus epidermidis M23864:W2(grey) OX=525375 GN=pdhA PE=4 SV=1	pdhA	101.41	38.4	21	11	197	1.086	0.927	0.867	1.02	1.048	1.066	0.879	0.0536888
D4FJN3	Ribulose-phosphate 3-epimerase OS=Staphylococcus epidermidis M23864:W2(grey) OX=525375 GN=rpe PE=3 SV=1	rpe	23.875	17.3	4	2	6
A0A7H5CAC6	DUF1514 domain-containing protein OS=Staphylococcus epidermidis OX=1282 GN=F9B71_04690 PE=4 SV=1	F9B71_04690	5.809	22.4	1	1	2	1.011	1.003	1.097	0.978	0.958	0.967	1.048	0.296631
D4FJQ7	Bifunctional protein PyrR OS=Staphylococcus epidermidis M23864:W2(grey) OX=525375 GN=pyrR PE=3 SV=1	pyrR	68.231	19.5	10	10	18	1.085	0.943	0.976	1.034	1.022	0.988	0.954	0.288313
Q5HR35	Tagatose-6-phosphate kinase OS=Staphylococcus epidermidis (strain ATCC 35984 / RP62A) OX=176279 GN=fruK PE=3 SV=1	fruK	32.782	29.4	8	3	19	1.08	0.986	0.942	1.003	0.925	0.961	0.988	0.851534
Q8CRT4	UPF0316 protein SE_1595 OS=Staphylococcus epidermidis (strain ATCC 12228 / FDA PCI 1200) OX=176280 GN=SE_1595 PE=3 SV=1	SE_1595	23.481	11.1	2	2	2	1.245	0.897	0.781	1.09	1.028	1.017	0.841	0.202985
D4FKE1	CDP-glycerol:poly(Glycerophosphate) glycerophosphotransferase OS=Staphylococcus epidermidis M23864:W2(grey) OX=525375 GN=HMPREF0794_1029 PE=3 SV=1	HMPREF0794_1029	186.52	15.9	24	1	65	1.061	1.046	1.01	1.058	0.879	0.954	1.076	0.247676
A0A0E1VD38	Uncharacterized protein OS=Staphylococcus epidermidis W23144 OX=525376 GN=HMPREF0791_1806 PE=4 SV=1	HMPREF0791_1806	87.886	8.3	5	4	7	1.003	1.008	1.106	0.892	0.997	1.012	0.998	0.930076
Q5HHD1	Putative peptidyl-prolyl cis-trans isomerase OS=Staphylococcus aureus (strain COL) OX=93062 GN=SACOL0957 PE=3 SV=1	SACOL0957	21.649	25.4	4	2	11	1.203	0.896	0.991	0.937	1.182	1.041	0.824	0.0237879
Q5HLQ7	Aldose 1-epimerase OS=Staphylococcus epidermidis (strain ATCC 35984 / RP62A) OX=176279 GN=galM PE=4 SV=1	galM	39.133	35.4	11	11	24	1.011	0.944	0.923	0.993	1.051	1.031	0.925	0.0319437
Q5HRV1	Uncharacterized protein OS=Staphylococcus epidermidis (strain ATCC 35984 / RP62A) OX=176279 GN=SERP0091 PE=4 SV=1	SERP0091	79.703	9.7	8	2	22	0.989	1.014	0.92	1.021	1.042	1.033	0.964	0.376541
A0A7I0AZS4	Accessory Sec system protein Asp2 OS=Staphylococcus epidermidis OX=1282 GN=asp2 PE=4 SV=1	asp2	59.935	11.6	5	5	5	1.022	1.101	0.977	0.96	0.93	1.021	1.022	0.716887
Q8CQE3	Uncharacterized response regulatory protein SE_0165 OS=Staphylococcus epidermidis (strain ATCC 12228 / FDA PCI 1200) OX=176280 GN=SE_0165 PE=3 SV=1	SE_0165	29.903	18.3	4	4	5	0.916	1.03	1.105	1.013	0.962	0.976	1.103	0.0409317
Q5HDX2	30S ribosomal protein S8 OS=Staphylococcus aureus (strain COL) OX=93062 GN=rpsH PE=3 SV=1	rpsH	14.831	60.6	10	1	68	0.64	1.286	1.557	0.946	0.717	0.82	1.74	0.029139
D4FMG0	Putative membrane-bound metal-dependent hydrolase OS=Staphylococcus epidermidis M23864:W2(grey) OX=525375 GN=yfhP PE=4 SV=1	yfhP	37.214	17.6	8	1	12	1.043	0.929	1.042	0.922	0.997	1.095	0.923	0.165713
A0A0H2VJ77	Putative resolvase OS=Staphylococcus epidermidis (strain ATCC 12228 / FDA PCI 1200) OX=176280 GN=SE_p416 PE=4 SV=1	SE_p416	20.87	23.6	4	4	4	1.034	0.968	0.992	1.012	0.96	1.054	0.975	0.475049
Q5HQE2	Serine protease HtrA-like OS=Staphylococcus epidermidis (strain ATCC 35984 / RP62A) OX=176279 GN=SERP0611 PE=3 SV=1	SERP0611	66.222	48.5	24	24	55	1.048	0.973	0.996	0.982	1.01	1.026	0.957	0.0255294
D4FJH9	UbiC transcription regulator-associated domain protein OS=Staphylococcus epidermidis M23864:W2(grey) OX=525375 GN=HMPREF0794_0717 PE=4 SV=1	HMPREF0794_0717	26.701	43.5	6	1	20	1.085	0.952	0.862	1.08	1.083	0.981	0.919	0.297617
Q5HNS8	Cysteine desulfurase OS=Staphylococcus epidermidis (strain ATCC 35984 / RP62A) OX=176279 GN=SERP1186 PE=3 SV=1	SERP1186	138.57	16	13	1	35	0.947	1.026	1.088	0.973	0.934	0.979	1.079	0.0981378
Q5HKR8	UDP-N-acetylglucosamine--peptide N-acetylglucosaminyltransferase stabilizing protein GtfB OS=Staphylococcus epidermidis (strain ATCC 35984 / RP62A) OX=176279 GN=gtfB PE=3 SV=1	gtfB	95.656	27.8	19	19	33	1.017	0.991	0.964	1.029	0.984	0.995	0.996	0.850277
Q5HQP0	Uncharacterized protein OS=Staphylococcus epidermidis (strain ATCC 35984 / RP62A) OX=176279 GN=SERP0508 PE=4 SV=1	SERP0508	33.51	5.7	2	2	2	0.978	1.005	1.002	1.073	0.973	0.982	1.05	0.0977858
Q8CTE7	HPr kinase/phosphorylase OS=Staphylococcus epidermidis (strain ATCC 12228 / FDA PCI 1200) OX=176280 GN=hprK PE=3 SV=1	hprK	34.696	58.7	17	17	39	0.999	0.991	0.971	0.973	1.028	1.039	0.957	0.0312877
Q8CNK7	Alanine racemase OS=Staphylococcus epidermidis (strain ATCC 12228 / FDA PCI 1200) OX=176280 GN=alr PE=3 SV=1	alr	42.955	47.6	15	15	47	1.076	0.959	0.914	0.993	1.06	0.994	0.916	0.0615096
A0A169SXT8	Cadmium efflux system accesory protein OS=Staphylococcus epidermidis OX=1282 PE=4 SV=1	--	15.284	42.1	10	10	20	0.98	1.051	1.032	1.018	0.933	0.984	1.07	0.0246444
A0A2R3SZG1	Transposase OS=Staphylococcus epidermidis OX=1282 PE=4 SV=1	--	34.656	6.5	2	2	2
D4FLV5	Uncharacterized protein OS=Staphylococcus epidermidis M23864:W2(grey) OX=525375 GN=HMPREF0794_1543 PE=4 SV=1	HMPREF0794_1543	65.032	10.3	5	5	5	0.938	1.084	0.928	1.162	1.005	0.893	1.119	0.217268
Q5HNA7	Uncharacterized protein OS=Staphylococcus epidermidis (strain ATCC 35984 / RP62A) OX=176279 GN=SERP1365 PE=4 SV=1	SERP1365	21.563	30.4	5	5	10	1.026	0.994	0.999	0.934	1.004	0.987	0.97	0.277289
Q5HPP9	Thiamine_BP domain-containing protein OS=Staphylococcus epidermidis (strain ATCC 35984 / RP62A) OX=176279 GN=SERP0859 PE=3 SV=1	SERP0859	10.876	95.8	7	6	22	1.004	1.006	1.042	0.94	1.031	0.987	0.989	0.731598
Q8CRI2	50S ribosomal protein L36 OS=Staphylococcus epidermidis (strain ATCC 12228 / FDA PCI 1200) OX=176280 GN=rpmJ PE=3 SV=1	rpmJ	4.2913	48.6	2	2	23	1.007	0.994	1.002	0.974	1.026	1.014	0.975	0.0631691
B9UDP0	Tuf (Fragment) OS=Staphylococcus epidermidis OX=1282 GN=tuf PE=4 SV=1	tuf	13.515	81.3	13	1	118
Q5HMU1	DNA-directed DNA polymerase OS=Staphylococcus epidermidis (strain ATCC 35984 / RP62A) OX=176279 GN=SERP1537 PE=4 SV=1	SERP1537	148.8	15.2	17	1	57
A0A0E1VIV7	Glutathione peroxidase OS=Staphylococcus epidermidis W23144 OX=525376 GN=gpxA-2 PE=3 SV=1	gpxA-2	42.757	27.7	8	1	53	1.128	1.038	1.047	0.966	0.87	0.965	1.03	0.68853
Q8CSJ3	Cell cycle protein GpsB OS=Staphylococcus epidermidis (strain ATCC 12228 / FDA PCI 1200) OX=176280 GN=gpsB PE=3 SV=1	gpsB	12.934	69.6	9	9	74	1.007	1.025	1.019	1.026	0.98	0.975	1.036	0.0247976
Q5HR58	Cytokinin riboside 5'-monophosphate phosphoribohydrolase OS=Staphylococcus epidermidis (strain ATCC 35984 / RP62A) OX=176279 GN=SERP0335 PE=3 SV=1	SERP0335	21.043	27.7	6	6	9	1.006	0.985	1.028	1.014	0.916	0.996	1.037	0.311122
Q8CNU2	Riboflavin biosynthesis protein RibBA OS=Staphylococcus epidermidis (strain ATCC 12228 / FDA PCI 1200) OX=176280 GN=ribBA PE=3 SV=1	ribBA	44.263	45.8	14	3	29	0.999	1.01	1.018	1.082	0.998	0.921	1.066	0.138394
A0A7G9EAI1	Uncharacterized protein OS=Staphylococcus epidermidis OX=1282 GN=ATM22_00890 PE=4 SV=1	ATM22_00890	18.815	34.7	6	2	30	1.297	0.793	0.7	0.81	1.26	1.199	0.613	0.000651755
D4FN64	Putative Na+/H+ antiporter OS=Staphylococcus epidermidis M23864:W2(grey) OX=525375 GN=HMPREF0794_2002 PE=4 SV=1	HMPREF0794_2002	115.94	12.9	11	1	16
A0A6A2CLS2	Iron transporter OS=Staphylococcus epidermidis OX=1282 GN=F9B58_03690 PE=4 SV=1	F9B58_03690	26.892	52	10	1	18	1.012	0.951	1.115	0.943	0.958	1.039	1	0.969109
Q5HD69	Uncharacterized protein SACOL2493 OS=Staphylococcus aureus (strain COL) OX=93062 GN=SACOL2493 PE=3 SV=1	SACOL2493	30.8	10.2	2	1	2
D4FLC5	tRNA uridine(34) hydroxylase OS=Staphylococcus epidermidis M23864:W2(grey) OX=525375 GN=trhO PE=3 SV=1	trhO	71.501	23.2	13	3	16	0.953	1.056	1.04	1.024	0.904	1.025	1.083	0.097957
A0A7T9WRS2	Metallophosphoesterase OS=Staphylococcus epidermidis OX=1282 GN=I6I40_09745 PE=4 SV=1	I6I40_09745	81.975	21.6	12	1	52
Q5HKT1	Mannose-6-phosphate isomerase OS=Staphylococcus epidermidis (strain ATCC 35984 / RP62A) OX=176279 GN=manA-2 PE=3 SV=1	manA-2	36.107	7.9	3	3	3
D4FMB4	Pectate_lyase_3 domain-containing protein OS=Staphylococcus epidermidis M23864:W2(grey) OX=525375 GN=HMPREF0794_1702 PE=4 SV=1	HMPREF0794_1702	71.789	14	8	1	9	0.852	1.1	1.283	0.824	0.869	1.051	1.157	0.410972
Q8CSB3	Transcription elongation factor GreA OS=Staphylococcus epidermidis (strain ATCC 12228 / FDA PCI 1200) OX=176280 GN=greA PE=3 SV=1	greA	17.769	80.4	11	11	115	1.014	1.011	0.992	0.97	1.007	1.02	0.978	0.143578
Q8CT82	Ornithine aminotransferase OS=Staphylococcus epidermidis (strain ATCC 12228 / FDA PCI 1200) OX=176280 GN=rocD PE=3 SV=1	rocD	43.43	46.5	14	1	25	0.914	1.064	1.07	1.144	0.788	0.998	1.214	0.0528276
A0A7I0ANB7	TIGR01741 family protein OS=Staphylococcus epidermidis OX=1282 GN=E1N03_01825 PE=4 SV=1	E1N03_01825	19.923	12.8	1	1	4	0.79	1.201	1.382	0.895	0.8	0.887	1.404	0.0712499
A0A6M9X6N8	Nuclease SbcCD subunit C OS=Staphylococcus epidermidis OX=1282 GN=F9B20_08005 PE=3 SV=1	F9B20_08005	100.31	41.2	33	33	45	1.014	1.019	0.997	0.98	0.978	1.02	0.995	0.77571
Q8CNF6	PTS system lactose-specific EIIA component OS=Staphylococcus epidermidis (strain ATCC 12228 / FDA PCI 1200) OX=176280 GN=lacF PE=3 SV=1	lacF	11.588	48.1	5	5	10	0.954	0.996	0.95	0.979	1.041	1.068	0.955	0.287909
Q8CSU3	DNA topoisomerase 1 OS=Staphylococcus epidermidis (strain ATCC 12228 / FDA PCI 1200) OX=176280 GN=topA PE=3 SV=1	topA	79.518	46.9	29	1	61	1.126	0.881	0.839	1.033	1.128	1.051	0.833	0.0498026
Q5HRZ9	Uncharacterized protein OS=Staphylococcus epidermidis (strain ATCC 35984 / RP62A) OX=176279 GN=SERP0040 PE=4 SV=1	SERP0040	7.8633	29.9	3	2	8	0.964	1.039	1.044	1.033	0.974	0.944	1.081	0.00128932
D4FKS9	Poly-gamma-glutamate biosynthesis protein PgsC OS=Staphylococcus epidermidis M23864:W2(grey) OX=525375 GN=pgsC PE=4 SV=1	pgsC	98.183	11.7	9	4	14	1.095	0.98	0.927	0.966	1.061	1.052	0.896	0.00588782
D4FMU1	Protein VraX OS=Staphylococcus epidermidis M23864:W2(grey) OX=525375 GN=HMPREF0794_1879 PE=4 SV=1	HMPREF0794_1879	7.1181	35.6	2	2	5	1.291	0.829	0.698	0.792	1.274	1.223	0.612	0.000795924
A0A0H2WWY0	Nitrate reductase (quinone) OS=Staphylococcus aureus (strain COL) OX=93062 GN=narG PE=3 SV=1	narG	205.6	8.3	14	1	39	1.05	0.991	0.984	1.079	0.962	0.953	1.03	0.526287
Q8CPL8	Ribonuclease HIII OS=Staphylococcus epidermidis (strain ATCC 12228 / FDA PCI 1200) OX=176280 GN=rnhC PE=3 SV=1	rnhC	34.875	34.1	11	11	24	0.992	1.053	1.02	1.046	0.944	0.957	1.078	0.0130475
Q5HRM7	DNA repair protein RadA OS=Staphylococcus epidermidis (strain ATCC 35984 / RP62A) OX=176279 GN=radA PE=3 SV=1	radA	50.303	33.5	12	12	25	1.001	1.002	1.004	1.004	0.984	1.026	1	0.988563
A0A0H2VJ59	Repressor of toxins Rot OS=Staphylococcus epidermidis (strain ATCC 12228 / FDA PCI 1200) OX=176280 GN=SE_1435 PE=4 SV=1	SE_1435	11.8	45.5	5	5	12	1.076	0.985	0.98	0.957	1.015	1.009	0.943	0.058205
Q8CPB2	Indole-3-glycerol phosphate synthase OS=Staphylococcus epidermidis (strain ATCC 12228 / FDA PCI 1200) OX=176280 GN=trpC PE=3 SV=1	trpC	30.123	3.8	1	1	1	0.973	0.999	1.022	0.981	1.014	1.031	0.995	0.817059
Q8CS99	Aspartate--tRNA ligase OS=Staphylococcus epidermidis (strain ATCC 12228 / FDA PCI 1200) OX=176280 GN=aspS PE=3 SV=1	aspS	66.882	62.9	33	31	112	1.012	1.004	1.007	1.025	1.006	0.992	1.009	0.382152
A0A0H2VIV1	Conserved hypothetical proetin OS=Staphylococcus epidermidis (strain ATCC 12228 / FDA PCI 1200) OX=176280 GN=SE_p521 PE=4 SV=1	SE_p521	28.483	74.7	18	17	33	1.019	0.999	0.984	1.009	0.998	0.998	0.992	0.48903
Q5HN92	DNA repair exonuclease family protein OS=Staphylococcus epidermidis (strain ATCC 35984 / RP62A) OX=176279 GN=SERP1380 PE=4 SV=1	SERP1380	46.444	48	15	15	34	1.034	0.974	1.002	0.98	1.021	1.009	0.965	0.0321535
A0A0H2VE62	Cadmium efflux system accesory protein OS=Staphylococcus epidermidis (strain ATCC 12228 / FDA PCI 1200) OX=176280 GN=SE_0073 PE=4 SV=1	SE_0073	7.1364	14.5	1	1	5	0.966	1.092	1.142	0.957	0.908	0.932	1.137	0.0874415
A0A0N0LYN1	HAD family hydrolase OS=Staphylococcus epidermidis OX=1282 GN=ATM22_10805 PE=4 SV=1	ATM22_10805	25.638	90.5	16	16	58	1.024	0.954	0.964	0.969	1.059	1.022	0.93	0.00425475
W5R8S0	DNA repair exonuclease OS=Staphylococcus phage phiIBB-SEP1 OX=1340769 GN=SEP1_051 PE=4 SV=1	SEP1_051	39.735	2.3	1	1	1	0.995	1.075	0.995	1.061	0.993	0.893	1.087	0.122614
A0A0H2WXW0	Uncharacterized protein OS=Staphylococcus aureus (strain COL) OX=93062 GN=SACOL2351 PE=4 SV=1	SACOL2351	253.85	3.2	4	1	13
Q8CP01	D-aminoacyl-tRNA deacylase OS=Staphylococcus epidermidis (strain ATCC 12228 / FDA PCI 1200) OX=176280 GN=dtd PE=3 SV=1	dtd	16.829	45.3	4	2	16	1.049	0.929	0.991	0.987	0.983	1.002	0.958	0.206485
A0A7G9EGG7	5-oxoprolinase subunit A OS=Staphylococcus epidermidis OX=1282 GN=pxpA PE=3 SV=1	pxpA	27.467	26.8	7	7	11	0.928	1.097	1.092	0.974	0.919	0.954	1.129	0.0411952
A0A0H2VJD8	NADH-dependent peroxiredoxin OS=Staphylococcus epidermidis (strain ATCC 12228 / FDA PCI 1200) OX=176280 GN=SE_1547 PE=4 SV=1	SE_1547	17.575	71.1	10	1	28	1.012	1.011	1.016	0.971	0.994	1.015	0.992	0.646528
Q5HNL0	Citrate synthase OS=Staphylococcus epidermidis (strain ATCC 35984 / RP62A) OX=176279 GN=gltA PE=3 SV=1	gltA	64.109	43.6	23	6	71	0.925	1.018	1.042	1.059	0.979	0.978	1.082	0.0226176
A0A6A2E0Y8	Uncharacterized protein OS=Staphylococcus epidermidis OX=1282 GN=F9B20_05865 PE=4 SV=1	F9B20_05865	21.805	43.5	7	7	12	1.107	0.942	0.935	0.989	1.041	1.012	0.907	0.0377254
Q5HMN3	Uncharacterized protein OS=Staphylococcus epidermidis (strain ATCC 35984 / RP62A) OX=176279 GN=SERP1595 PE=4 SV=1	SERP1595	35.786	5.3	1	1	1
D4FLD8	MepB protein OS=Staphylococcus epidermidis M23864:W2(grey) OX=525375 GN=HMPREF0794_1376 PE=4 SV=1	HMPREF0794_1376	18.123	18.5	2	1	4	0.933	1.007	1.241	0.996	0.879	0.934	1.181	0.0949701
Q5HL04	Anaerobic ribonucleoside-triphosphate reductase OS=Staphylococcus epidermidis (strain ATCC 35984 / RP62A) OX=176279 GN=nrdD PE=4 SV=1	nrdD	149.32	18.1	27	2	63
A0A7H5C9L5	Cysteine desulfurase OS=Staphylococcus epidermidis OX=1282 GN=F9B71_01070 PE=3 SV=1	F9B71_01070	42.514	38.2	9	1	27
A0A0H2WZR9	Uncharacterized protein OS=Staphylococcus aureus (strain COL) OX=93062 GN=SACOL0075 PE=4 SV=1	SACOL0075	22.662	6.5	1	1	2	0.691	1.259	1.432	1.054	0.721	0.774	1.713	0.00496835
Q8CSP4	UPF0291 protein SE_1024 OS=Staphylococcus epidermidis (strain ATCC 12228 / FDA PCI 1200) OX=176280 GN=SE_1024 PE=3 SV=1	SE_1024	9.3615	61.5	10	10	24	0.985	0.958	1.01	1.092	1.004	0.972	1.033	0.46604
Q8CPJ4	Carbamoyl-phosphate synthase large chain OS=Staphylococcus epidermidis (strain ATCC 12228 / FDA PCI 1200) OX=176280 GN=carB PE=3 SV=1	carB	117.39	44.2	38	38	103	0.978	0.997	1.02	1.002	0.985	1.003	1.018	0.157803
W5R8K4	Tail lysin OS=Staphylococcus phage phiIBB-SEP1 OX=1340769 GN=SEP1_028 PE=4 SV=1	SEP1_028	150.78	0.7	1	1	1	1.106	0.989	0.86	0.976	1.105	1.014	0.876	0.0655078
A0A7G9EBT7	NADP-dependent oxidoreductase OS=Staphylococcus epidermidis OX=1282 GN=ATM22_03245 PE=4 SV=1	ATM22_03245	36.939	60.2	20	1	65	0.932	1.096	1.04	1.148	0.826	0.942	1.216	0.0180559
Q8CT29	Phosphoribosylformylglycinamidine cyclo-ligase OS=Staphylococcus epidermidis (strain ATCC 12228 / FDA PCI 1200) OX=176280 GN=purM PE=3 SV=1	purM	37.39	37.9	10	4	26	1.12	0.914	0.899	0.953	1.061	1.088	0.846	0.00201935
Q8CR21	Pantothenate synthetase OS=Staphylococcus epidermidis (strain ATCC 12228 / FDA PCI 1200) OX=176280 GN=panC PE=3 SV=1	panC	32.278	46.9	13	13	29	1.014	0.978	0.986	1.014	1.039	1.014	0.971	0.096389
Q8CPD0	Catalase OS=Staphylococcus epidermidis (strain ATCC 12228 / FDA PCI 1200) OX=176280 GN=katA PE=3 SV=1	katA	58.212	72.2	26	26	172	1.04	0.964	0.939	0.956	1.039	1.034	0.918	0.000431494
D4FJM6	Phosphate acyltransferase OS=Staphylococcus epidermidis M23864:W2(grey) OX=525375 GN=plsX PE=3 SV=1	plsX	213.72	14.8	27	3	101	0.984	0.966	1.001	1.002	1.025	1.043	0.973	0.26242
Q8CRY0	UPF0342 protein SE_1526 OS=Staphylococcus epidermidis (strain ATCC 12228 / FDA PCI 1200) OX=176280 GN=SE_1526 PE=3 SV=1	SE_1526	13.442	75.4	10	4	171	1.026	0.989	0.986	0.978	1.02	1.015	0.965	0.00141202
Q8CSF4	Aminomethyltransferase OS=Staphylococcus epidermidis (strain ATCC 12228 / FDA PCI 1200) OX=176280 GN=gcvT PE=3 SV=1	gcvT	40.42	66.7	18	8	44	1.022	0.956	0.874	1.007	1.092	1.048	0.897	0.0739847
A0A0H2WX87	DNA repair protein RecN OS=Staphylococcus aureus (strain COL) OX=93062 GN=recN PE=3 SV=1	recN	64.295	17.9	8	1	18	1.127	0.844	0.996	1	1.019	1.056	0.887	0.125319
Q8CRB0	Putative hemin import ATP-binding protein HrtA OS=Staphylococcus epidermidis (strain ATCC 12228 / FDA PCI 1200) OX=176280 GN=hrtA PE=3 SV=1	hrtA	24.544	24.3	6	3	8	1.346	0.779	0.623	0.889	1.302	1.176	0.599	0.00946219
Q8CPZ2	Protein translocase subunit SecA 1 OS=Staphylococcus epidermidis (strain ATCC 12228 / FDA PCI 1200) OX=176280 GN=secA1 PE=3 SV=1	secA1	96.059	63	53	26	135	1.014	0.988	1.003	1.008	1.003	0.999	0.994	0.491395
Q5HND4	Uncharacterized protein OS=Staphylococcus epidermidis (strain ATCC 35984 / RP62A) OX=176279 GN=SERP1335 PE=4 SV=1	SERP1335	17.002	10.9	2	2	2	1.165	0.912	0.768	1.06	1.089	1.064	0.826	0.109096
Q5HP54	Uncharacterized protein OS=Staphylococcus epidermidis (strain ATCC 35984 / RP62A) OX=176279 GN=SERP1059 PE=4 SV=1	SERP1059	21.035	17.8	2	2	2	0.93	1.026	1.126	1.023	0.908	0.985	1.125	0.041976
Q5HQZ0	Uncharacterized protein OS=Staphylococcus epidermidis (strain ATCC 35984 / RP62A) OX=176279 GN=SERP0406 PE=4 SV=1	SERP0406	20.829	24	4	4	5
Q8CPK4	Cell division protein FtsZ OS=Staphylococcus epidermidis (strain ATCC 12228 / FDA PCI 1200) OX=176280 GN=ftsZ PE=3 SV=1	ftsZ	41.438	70.3	23	4	245	1.236	1.025	0.669	1.075	0.883	0.876	0.925	0.669863
Q8CPY5	Glyceraldehyde-3-phosphate dehydrogenase 1 OS=Staphylococcus epidermidis (strain ATCC 12228 / FDA PCI 1200) OX=176280 GN=gapA1 PE=3 SV=1	gapA1	36.19	92	30	1	704	0.78	0.968	1.012	1.245	0.818	0.759	1.368	0.0187591
Q5HQV6	Uncharacterized protein OS=Staphylococcus epidermidis (strain ATCC 35984 / RP62A) OX=176279 GN=SERP0440 PE=4 SV=1	SERP0440	8.9089	12.8	1	1	1
A0A0H2WXS5	Uncharacterized protein OS=Staphylococcus aureus (strain COL) OX=93062 GN=SACOL0156 PE=4 SV=1	SACOL0156	59.287	1.3	1	1	1
Q8CRH1	50S ribosomal protein L24 OS=Staphylococcus epidermidis (strain ATCC 12228 / FDA PCI 1200) OX=176280 GN=rplX PE=3 SV=1	rplX	11.444	22.9	3	3	20	1.01	1.029	1.045	0.99	0.944	0.974	1.046	0.146277
Q8CST7	Proline--tRNA ligase OS=Staphylococcus epidermidis (strain ATCC 12228 / FDA PCI 1200) OX=176280 GN=proS PE=3 SV=1	proS	64.358	58	26	25	97	1.028	0.992	0.983	1.005	1.026	1.002	0.975	0.0736221
Q8CNI0	S-ribosylhomocysteine lyase OS=Staphylococcus epidermidis (strain ATCC 12228 / FDA PCI 1200) OX=176280 GN=luxS PE=3 SV=1	luxS	17.644	42.9	5	1	56	1.07	0.926	0.965	0.932	1.12	1.036	0.875	0.00688348
A0A0H2VIY4	DNA-directed DNA polymerase OS=Staphylococcus epidermidis (strain ATCC 12228 / FDA PCI 1200) OX=176280 GN=SE_p301 PE=4 SV=1	SE_p301	127.3	37.2	32	32	42	0.894	1.104	1.073	1.084	0.894	0.913	1.207	6.54838e-05
A0A7G9EC48	Dihydroxy-acid dehydratase OS=Staphylococcus epidermidis OX=1282 GN=ilvD PE=3 SV=1	ilvD	104.99	15.4	12	1	24
Q5HP91	Endonuclease III OS=Staphylococcus epidermidis (strain ATCC 35984 / RP62A) OX=176279 GN=nth PE=3 SV=1	nth	25.295	34.2	5	4	8	0.876	1.038	1.139	1.034	0.89	0.956	1.18	0.0164762
Q5HCU5	Probable malate:quinone oxidoreductase 2 OS=Staphylococcus aureus (strain COL) OX=93062 GN=mqo2 PE=3 SV=1	mqo2	55.998	21.5	10	1	59	1.037	1.054	0.945	0.944	0.958	1.083	0.956	0.430194
Q5HDJ0	Probable malate:quinone oxidoreductase 1 OS=Staphylococcus aureus (strain COL) OX=93062 GN=mqo1 PE=3 SV=1	mqo1	54.813	1.8	1	1	1
A0A7I0AMM0	YtxH domain-containing protein OS=Staphylococcus epidermidis OX=1282 GN=E1N03_04350 PE=4 SV=1	E1N03_04350	38.072	8.1	4	1	10	1.013	0.987	1.004	0.983	0.984	1.049	0.976	0.294409
Q5HRU0	Uncharacterized protein OS=Staphylococcus epidermidis (strain ATCC 35984 / RP62A) OX=176279 GN=SERP0102 PE=4 SV=1	SERP0102	65.636	34.9	17	16	23	0.987	1.02	0.996	0.998	1.008	1.041	0.993	0.702324
Q5HMA7	Threonylcarbamoyl-AMP synthase OS=Staphylococcus epidermidis (strain ATCC 35984 / RP62A) OX=176279 GN=SERP1722 PE=3 SV=1	SERP1722	39.265	32.3	9	9	15	1.065	0.964	0.964	0.992	1.01	1.041	0.937	0.0230623
A0A0E1V9Y0	Aspartate 1-decarboxylase OS=Staphylococcus epidermidis W23144 OX=525376 GN=panD PE=3 SV=1	panD	136.42	16.9	20	1	184
Q8CNK3	Cardiolipin synthase 2 OS=Staphylococcus epidermidis (strain ATCC 12228 / FDA PCI 1200) OX=176280 GN=cls2 PE=3 SV=2	cls2	56.015	27.5	12	12	20	0.925	1.036	1.076	1.034	0.968	0.962	1.102	0.00725431
Q5HGP5	Cell division protein FtsZ OS=Staphylococcus aureus (strain COL) OX=93062 GN=ftsZ PE=3 SV=1	ftsZ	41.036	51	15	1	205	0.986	1.041	0.999	1.053	0.972	0.964	1.059	0.0305794
A0A7I0BXJ1	Glycosyltransferase (Fragment) OS=Staphylococcus epidermidis OX=1282 GN=E1M98_12585 PE=3 SV=1	E1M98_12585	134.73	30.7	29	1	168
Q5HKK6	Acyl-CoA synthetase OS=Staphylococcus epidermidis (strain ATCC 35984 / RP62A) OX=176279 GN=SERP2338 PE=3 SV=1	SERP2338	272.63	30.8	55	1	89	1.073	0.873	0.944	1.04	1.058	1.054	0.897	0.0942837
D4FJ93	Cell envelope-like function transcriptional attenuator common domain protein OS=Staphylococcus epidermidis M23864:W2(grey) OX=525375 GN=psr PE=3 SV=1	psr	37.416	41.3	11	11	23	0.964	1.027	1.054	1.027	0.984	0.97	1.065	0.00397306
Q8CQ89	Transcriptional regulator CtsR OS=Staphylococcus epidermidis (strain ATCC 12228 / FDA PCI 1200) OX=176280 GN=ctsR PE=3 SV=1	ctsR	17.784	42.5	6	6	14	1.005	1.035	0.939	1.134	0.964	0.946	1.066	0.344074
A0A4Y7VRG1	Oxidoreductase OS=Staphylococcus epidermidis OX=1282 GN=ATM22_03940 PE=3 SV=1	ATM22_03940	8.2863	16.2	2	2	2	0.933	1.07	1.077	1.04	0.92	0.956	1.135	0.00124245
A0A7M3F6E9	Uncharacterized protein OS=Staphylococcus epidermidis OX=1282 GN=E1N11_12260 PE=4 SV=1	E1N11_12260	27.256	7.4	2	1	1	1.017	0.956	0.974	1.036	0.982	1.056	0.971	0.406809
Q8CQ56	Alcohol dehydrogenase OS=Staphylococcus epidermidis (strain ATCC 12228 / FDA PCI 1200) OX=176280 GN=adh PE=3 SV=1	adh	36.519	63.5	16	13	82	1.028	0.983	0.984	0.975	1.019	1.016	0.96	0.000913349
D4FP79	Energy-coupling factor transporter ATP-binding protein EcfA OS=Staphylococcus epidermidis M23864:W2(grey) OX=525375 GN=ecfA PE=3 SV=1	ecfA	57.056	21.9	8	4	10	0.904	1.043	0.765	1.1	1.183	0.955	0.956	0.736196
D4FL27	Response regulator receiver domain protein OS=Staphylococcus epidermidis M23864:W2(grey) OX=525375 GN=HMPREF0794_1265 PE=4 SV=1	HMPREF0794_1265	25.629	6.3	2	2	3	1.087	1.093	0.814	0.983	0.929	1.117	0.922	0.458826
Q8CTE0	ATP-dependent Clp protease proteolytic subunit OS=Staphylococcus epidermidis (strain ATCC 12228 / FDA PCI 1200) OX=176280 GN=clpP PE=3 SV=1	clpP	21.384	63.9	12	12	78	0.965	1.027	1.031	0.998	0.988	0.988	1.039	0.0413059
D4FKN6	Gluconokinase OS=Staphylococcus epidermidis M23864:W2(grey) OX=525375 GN=gntK PE=3 SV=1	gntK	115.51	14.9	15	4	22	0.942	1.048	1.074	1.049	0.932	0.95	1.123	0.000286051
Q8CS62	UPF0173 metal-dependent hydrolase SE_1382 OS=Staphylococcus epidermidis (strain ATCC 12228 / FDA PCI 1200) OX=176280 GN=SE_1382 PE=3 SV=1	SE_1382	25.241	24.5	5	5	11	0.997	1.01	1.002	1.043	1.016	0.99	1.017	0.304122
A0A7I0A7E7	NAD(P)-dependent oxidoreductase OS=Staphylococcus epidermidis OX=1282 GN=E1N12_05200 PE=4 SV=1	E1N12_05200	23.644	71.6	14	14	35	0.98	1.038	1.052	1.061	0.961	0.917	1.103	0.00912285
D4FNT3	Protein DltD OS=Staphylococcus epidermidis M23864:W2(grey) OX=525375 GN=dltD PE=3 SV=1	dltD	47.452	37.6	13	1	32	1.493	0.695	0.555	1.001	1.313	1.078	0.58	0.0446667
D4FK83	UPF0738 protein HMPREF0794_0971 OS=Staphylococcus epidermidis M23864:W2(grey) OX=525375 GN=HMPREF0794_0971 PE=3 SV=1	HMPREF0794_0971	107.13	11.9	11	6	26	1.031	0.938	0.938	0.962	1.062	1.033	0.908	0.00162342
A0A0H2VKB0	Uncharacterized protein OS=Staphylococcus epidermidis (strain ATCC 12228 / FDA PCI 1200) OX=176280 GN=SE_p404 PE=4 SV=1	SE_p404	9.6451	29.1	3	3	4	1.003	1.03	1.018	0.977	0.971	1.026	1.008	0.732425
Q5HP62	Ferredoxin OS=Staphylococcus epidermidis (strain ATCC 35984 / RP62A) OX=176279 GN=fer PE=4 SV=1	fer	120.3	17.4	20	19	63	1.014	1.012	0.996	1.01	0.98	0.998	1.009	0.474189
Q8CRQ0	Antitoxin MazE OS=Staphylococcus epidermidis (strain ATCC 12228 / FDA PCI 1200) OX=176280 GN=mazE PE=3 SV=1	mazE	6.2899	16.1	1	1	1	1.299	0.769	0.986	0.88	1.113	1.031	0.765	0.0535751
H9BJI9	Carbamate kinase OS=Staphylococcus epidermidis OX=1282 GN=arcC PE=3 SV=1	arcC	33.545	47.7	11	11	35	1.301	0.759	0.742	0.73	1.265	1.28	0.58	2.54904e-06
Q8CSV4	Uncharacterized protein SE_0901 OS=Staphylococcus epidermidis (strain ATCC 12228 / FDA PCI 1200) OX=176280 GN=SE_0901 PE=4 SV=1	SE_0901	60.809	53.4	26	26	98	0.994	1.012	1.014	1.012	0.976	0.99	1.026	0.00955354
D2JC68	Beta-lactamase regulatory sensor-transducer BlaR1 OS=Staphylococcus epidermidis OX=1282 GN=blaR1 PE=3 SV=1	blaR1	69.268	25	16	6	31	1.331	0.713	0.792	0.726	1.273	1.27	0.576	0.000103289
A0A0H2WZN5	Transaldolase OS=Staphylococcus aureus (strain COL) OX=93062 GN=tal PE=4 SV=1	tal	25.705	22.8	4	1	18
Q8CMT6	Cysteine synthase OS=Staphylococcus epidermidis (strain ATCC 12228 / FDA PCI 1200) OX=176280 GN=cysK PE=3 SV=1	cysK	33.151	85.8	17	17	133	0.844	1.104	1.115	1.099	0.888	0.907	1.257	0.000459849
Q8CMY2	Oxygen-dependent choline dehydrogenase OS=Staphylococcus epidermidis (strain ATCC 12228 / FDA PCI 1200) OX=176280 GN=betA PE=3 SV=1	betA	64.26	78.8	41	32	282	0.958	1.02	1.043	1.03	0.973	0.973	1.065	0.00159387
D4FNE0	7-carboxy-7-deazaguanine synthase OS=Staphylococcus epidermidis M23864:W2(grey) OX=525375 GN=queE PE=3 SV=1	queE	27.04	40.9	6	6	9	0.875	1.123	1.049	1.226	0.828	0.796	1.36	0.00441196
A0A7I0APM8	Membrane-associated protein TcaA (Fragment) OS=Staphylococcus epidermidis OX=1282 GN=E1N00_11915 PE=3 SV=1	E1N00_11915	51.706	34.9	16	3	21	1.049	0.99	0.997	1.032	1.018	0.998	0.985	0.47953
D4FIU6	Putative alanine racemase OS=Staphylococcus epidermidis M23864:W2(grey) OX=525375 GN=HMPREF0794_0597 PE=4 SV=1	HMPREF0794_0597	41.631	10.1	3	1	4	0.979	1.014	1.063	1.1	0.959	0.893	1.122	0.03404
Q8CPK5	Cell division protein FtsA OS=Staphylococcus epidermidis (strain ATCC 12228 / FDA PCI 1200) OX=176280 GN=ftsA PE=3 SV=1	ftsA	52.143	54.3	20	14	76	1.017	0.996	1.041	0.986	1.003	0.992	1.004	0.859842
A0A7G9EEF0	Phenylalanine--tRNA ligase alpha subunit OS=Staphylococcus epidermidis OX=1282 GN=pheS PE=3 SV=1	pheS	40.185	39.8	12	1	48
A0A7G9EF33	Fe-S_biosyn domain-containing protein OS=Staphylococcus epidermidis OX=1282 GN=ATM22_09355 PE=4 SV=1	ATM22_09355	12.573	11.8	1	1	2	0.918	1.081	1.087	1.006	0.948	0.958	1.124	0.014267
D4FL82	LPXTG-motif cell wall anchor domain protein OS=Staphylococcus epidermidis M23864:W2(grey) OX=525375 GN=sraP PE=4 SV=1	sraP	75.081	60.9	42	4	126	1.048	0.998	0.956	0.932	1.048	1.043	0.919	0.0135315
Q5HLI9	Uncharacterized protein OS=Staphylococcus epidermidis (strain ATCC 35984 / RP62A) OX=176279 GN=SERP1998 PE=1 SV=1	SERP1998	17.705	28.2	2	2	4	0.768	1.026	1.112	1.122	0.998	1.013	1.173	0.151909
Q8CQD9	Accumulation-associated protein OS=Staphylococcus epidermidis (strain ATCC 12228 / FDA PCI 1200) OX=176280 GN=SE_0175 PE=3 SV=1	SE_0175	157.14	81.4	62	1	315	1.042	0.927	0.985	0.948	1.043	1.005	0.926	0.0227182
Q5HPT7	GTP-sensing transcriptional pleiotropic repressor CodY OS=Staphylococcus epidermidis (strain ATCC 35984 / RP62A) OX=176279 GN=codY PE=3 SV=1	codY	28.746	74.2	18	18	105	1.002	0.996	0.986	1.006	0.999	0.995	0.997	0.682597
Q8CSW3	DNA-directed RNA polymerase subunit omega OS=Staphylococcus epidermidis (strain ATCC 12228 / FDA PCI 1200) OX=176280 GN=rpoZ PE=3 SV=1	rpoZ	7.7909	40	4	4	15	0.878	1.129	1.148	1.1	0.887	0.949	1.244	0.00132493
Q5HNS3	HesA/MoeB/ThiF family protein OS=Staphylococcus epidermidis (strain ATCC 35984 / RP62A) OX=176279 GN=SERP1191 PE=4 SV=1	SERP1191	28.785	40.7	10	10	26	0.956	1.078	1.072	1.039	0.941	0.937	1.125	0.000816549
D4FNZ5	FAD binding domain protein OS=Staphylococcus epidermidis M23864:W2(grey) OX=525375 GN=HMPREF0794_2283 PE=4 SV=1	HMPREF0794_2283	84.792	38.8	24	3	67	1.041	0.992	1	1.101	1.025	0.965	1.02	0.654524
Q5HP03	Thiamine_BP domain-containing protein OS=Staphylococcus epidermidis (strain ATCC 35984 / RP62A) OX=176279 GN=SERP1111 PE=3 SV=1	SERP1111	12.32	63	5	1	39	0.88	1.018	0.991	1.134	0.84	0.958	1.174	0.0470376
Q8CNH8	Pyrimidine-nucleoside phosphorylase OS=Staphylococcus epidermidis (strain ATCC 12228 / FDA PCI 1200) OX=176280 GN=pdp PE=3 SV=1	pdp	46.36	74.6	34	5	178	1.034	0.952	0.954	1.011	1.05	1.034	0.936	0.0301789
A0A2G7I1K9	Cof-type HAD-IIB family hydrolase OS=Staphylococcus epidermidis OX=1282 GN=ATM22_09185 PE=4 SV=1	ATM22_09185	31.317	71.1	12	1	35
Q5HRS0	PSP1 C-terminal domain-containing protein OS=Staphylococcus epidermidis (strain ATCC 35984 / RP62A) OX=176279 GN=SERP0123 PE=4 SV=1	SERP0123	30.409	50.2	12	12	14	0.969	1.061	1.012	1.057	1.032	0.917	1.073	0.129816
D4FIN3	Bifunctional ligase/repressor BirA OS=Staphylococcus epidermidis M23864:W2(grey) OX=525375 GN=birA PE=3 SV=1	birA	37.353	17.3	6	1	9	0.925	0.695	1.006	1.241	0.988	1.166	0.956	0.727086
Q8CMZ0	L-lactate dehydrogenase OS=Staphylococcus epidermidis (strain ATCC 12228 / FDA PCI 1200) OX=176280 GN=ldh PE=3 SV=1	ldh	34.101	45.6	14	1	130	1.513	0.691	0.535	0.974	1.312	1.076	0.564	0.0410966
A0A169SY45	Cassette chromosome recombinase C3 allele 1 OS=Staphylococcus epidermidis OX=1282 GN=ccrC3 PE=4 SV=1	ccrC3	64.955	3.9	1	1	1	0.988	1.038	0.98	1.031	1.011	0.971	1.027	0.293787
Q8CQU8	50S ribosomal protein L25 OS=Staphylococcus epidermidis (strain ATCC 12228 / FDA PCI 1200) OX=176280 GN=rplY PE=3 SV=1	rplY	24.093	31.5	6	6	75	0.931	1.044	1.07	1.08	0.958	0.938	1.13	0.00077198
Q8CSN0	Conserved virulence factor B OS=Staphylococcus epidermidis (strain ATCC 12228 / FDA PCI 1200) OX=176280 GN=cvfB PE=3 SV=1	cvfB	33.856	66.8	20	5	45	0.967	0.978	0.957	0.998	0.961	1.026	0.993	0.790695
Q8CTK9	Probable transcriptional regulatory protein SE_0437 OS=Staphylococcus epidermidis (strain ATCC 12228 / FDA PCI 1200) OX=176280 GN=SE_0437 PE=3 SV=2	SE_0437	26.566	79	12	12	102	0.988	1.013	1.013	1.008	0.967	0.995	1.028	0.0322704
Q8CPT5	Chaperone protein ClpB OS=Staphylococcus epidermidis (strain ATCC 12228 / FDA PCI 1200) OX=176280 GN=clpB PE=3 SV=1	clpB	98.186	53	41	20	114	0.833	1.132	1.139	1.152	0.843	0.854	1.353	4.34429e-06
Q5HR45	Na(+)/dicarboxylate symporter OS=Staphylococcus epidermidis (strain ATCC 35984 / RP62A) OX=176279 GN=SERP0348 PE=3 SV=1	SERP0348	55.888	2.3	2	2	3	0.941	1.055	0.991	0.987	1.032	1.008	1.017	0.642666
Q8CPI3	3-oxoacyl-[acyl-carrier-protein] reductase FabG OS=Staphylococcus epidermidis (strain ATCC 12228 / FDA PCI 1200) OX=176280 GN=fabG PE=3 SV=1	fabG	26.074	64.3	13	5	96	1.074	0.911	0.903	0.991	1.038	1.023	0.895	0.0273929
Q8CSW0	Probable dual-specificity RNA methyltransferase RlmN OS=Staphylococcus epidermidis (strain ATCC 12228 / FDA PCI 1200) OX=176280 GN=rlmN PE=3 SV=1	rlmN	42.211	32.7	9	3	22	1.059	0.943	0.948	0.945	1.061	1.034	0.899	0.000229171
Q8CNI5	Putative aldehyde dehydrogenase SE_1720 OS=Staphylococcus epidermidis (strain ATCC 12228 / FDA PCI 1200) OX=176280 GN=SE_1720 PE=3 SV=1	SE_1720	51.89	56.6	20	14	88	0.996	1.014	1.022	1.05	0.974	0.975	1.048	0.0219604
A0A6N4IVU9	DUF1672 family protein (Fragment) OS=Staphylococcus epidermidis OX=1282 GN=E1N09_13150 PE=4 SV=1	E1N09_13150	13.056	14.3	1	1	1	1.022	1.013	1.035	0.91	0.999	1.043	0.965	0.429557
Q5HQD6	IDEAL domain-containing protein OS=Staphylococcus epidermidis (strain ATCC 35984 / RP62A) OX=176279 GN=SERP0617 PE=4 SV=1	SERP0617	8.4195	13.9	1	1	1
Q8CRU5	Diacylglycerol kinase OS=Staphylococcus epidermidis (strain ATCC 12228 / FDA PCI 1200) OX=176280 GN=dagK PE=3 SV=1	dagK	34.95	22.5	6	1	16	0.997	1.018	1.124	0.948	0.95	0.972	1.059	0.346642
Q8CRG8	30S ribosomal protein S17 OS=Staphylococcus epidermidis (strain ATCC 12228 / FDA PCI 1200) OX=176280 GN=rpsQ PE=3 SV=1	rpsQ	10.189	49.4	5	1	19	1.079	0.964	0.914	1.026	0.99	0.982	0.952	0.332295
Q5HNX3	NfeD domain-containing protein OS=Staphylococcus epidermidis (strain ATCC 35984 / RP62A) OX=176279 GN=SERP1141 PE=4 SV=1	SERP1141	26.391	16.9	3	3	3	0.898	1.015	1.13	1.064	0.918	0.969	1.152	0.0212571
A0A0H2VGW9	Multifunctional fusion protein OS=Staphylococcus epidermidis (strain ATCC 12228 / FDA PCI 1200) OX=176280 GN=secD PE=3 SV=1	secD	84.427	27.1	17	17	31	0.964	1.074	1.047	1.038	0.972	0.923	1.105	0.00629032
Q5HIC3	Ribulokinase OS=Staphylococcus aureus (strain COL) OX=93062 GN=araB PE=3 SV=1	araB	61.01	3.5	2	2	3	1.111	0.933	0.917	0.885	1.11	1.096	0.825	0.000280364
Q8CT80	Glucose-6-phosphate isomerase OS=Staphylococcus epidermidis (strain ATCC 12228 / FDA PCI 1200) OX=176280 GN=pgi PE=3 SV=1	pgi	49.707	60.9	26	1	145	1.174	0.916	1.006	0.907	1.051	0.994	0.879	0.0961873
A0A7G9ECB3	Beta-lactamase OS=Staphylococcus epidermidis OX=1282 GN=ATM22_04235 PE=3 SV=1	ATM22_04235	31.409	53.4	17	8	25	1.315	0.715	0.597	0.8	1.312	1.231	0.547	0.00228029
A0A7I0AWX5	N-acetyltransferase OS=Staphylococcus epidermidis OX=1282 GN=E1M98_11025 PE=4 SV=1	E1M98_11025	21.422	26.9	4	2	5	1.034	0.776	0.756	1.608	0.957	0.893	1.089	0.934984
A0A0H2WZQ5	Uncharacterized protein OS=Staphylococcus aureus (strain COL) OX=93062 GN=SACOL0058 PE=4 SV=1	SACOL0058	67.78	1.4	1	1	1
A0A2G7HWJ6	L-serine deaminase OS=Staphylococcus epidermidis OX=1282 GN=sdaAB PE=3 SV=1	sdaAB	24.417	65	11	11	38	1.1	0.923	0.94	0.926	1.105	1.11	0.841	9.85088e-06
A0A0H2VI94	Probable succinyl-diaminopimelate desuccinylase OS=Staphylococcus epidermidis (strain ATCC 12228 / FDA PCI 1200) OX=176280 GN=SE_2220 PE=4 SV=1	SE_2220	46.073	41.5	12	12	28	1.028	0.959	0.995	0.986	1.044	1.057	0.94	0.0103953
Q8CP67	Chorismate synthase OS=Staphylococcus epidermidis (strain ATCC 12228 / FDA PCI 1200) OX=176280 GN=aroC PE=3 SV=1	aroC	43.105	43.6	13	13	21	1.021	1.004	0.956	1.007	1.034	0.998	0.972	0.219845
D4FNS4	Uncharacterized protein OS=Staphylococcus epidermidis M23864:W2(grey) OX=525375 GN=HMPREF0794_2212 PE=4 SV=1	HMPREF0794_2212	15.556	67.4	9	9	19	1.05	0.976	0.992	1.013	0.995	1.013	0.975	0.255583
A0A7I0BKJ2	Uncharacterized protein OS=Staphylococcus epidermidis OX=1282 GN=E1N03_07190 PE=4 SV=1	E1N03_07190	33.125	17.8	4	1	5	0.957	1.104	1.187	0.979	0.846	0.915	1.203	0.0517499
D4FIV0	4-hydroxy-tetrahydrodipicolinate synthase OS=Staphylococcus epidermidis M23864:W2(grey) OX=525375 GN=dapA PE=3 SV=1	dapA	32.676	21.6	5	5	8	0.911	1.085	1.026	1.084	0.936	0.917	1.156	0.00201516
D4FK80	Pseudouridine synthase OS=Staphylococcus epidermidis M23864:W2(grey) OX=525375 GN=HMPREF0794_0968 PE=3 SV=1	HMPREF0794_0968	62.59	9.1	6	2	9
Q8CS92	S-adenosylmethionine:tRNA ribosyltransferase-isomerase OS=Staphylococcus epidermidis (strain ATCC 12228 / FDA PCI 1200) OX=176280 GN=queA PE=3 SV=2	queA	39.002	43.1	11	8	27	0.956	1.009	1.023	0.99	1.023	0.982	1.021	0.397652
Q8CN40	Uncharacterized oxidoreductase SE_2036 OS=Staphylococcus epidermidis (strain ATCC 12228 / FDA PCI 1200) OX=176280 GN=SE_2036 PE=3 SV=1	SE_2036	24.541	66.5	10	10	37	1.042	0.956	0.985	0.958	1.048	1.056	0.921	0.00139815
Q5HPX2	Protein phosphatase 2C domain protein OS=Staphylococcus epidermidis (strain ATCC 35984 / RP62A) OX=176279 GN=SERP0785 PE=4 SV=1	SERP0785	58.474	16.4	9	3	15	0.603	1.348	1.311	0.902	0.781	0.988	1.501	0.100134
Q5HMG8	MutS family protein OS=Staphylococcus epidermidis (strain ATCC 35984 / RP62A) OX=176279 GN=SERP1660 PE=4 SV=1	SERP1660	62.434	11.9	6	6	8	0.993	0.998	0.916	1.123	0.96	0.966	1.04	0.578288
D2JCN0	Uncharacterized protein OS=Staphylococcus epidermidis OX=1282 GN=SAP025A_018 PE=4 SV=1	SAP025A_018	4.2337	68.4	3	3	12	1.242	0.663	0.747	0.705	1.376	1.337	0.535	0.000168794
A0A0H2VL23	Uncharacterized protein OS=Staphylococcus epidermidis (strain ATCC 12228 / FDA PCI 1200) OX=176280 GN=SE_p305 PE=4 SV=1	SE_p305	17.874	56.4	10	10	21	1.031	0.994	0.976	0.96	1.014	1.026	0.954	0.0136493
D4FJK2	ATP-dependent protease ATPase subunit HslU OS=Staphylococcus epidermidis M23864:W2(grey) OX=525375 GN=hslU PE=3 SV=1	hslU	82.256	40.7	23	1	89	1.142	0.879	0.766	1.061	1.164	1.053	0.806	0.0868764
D4FHQ6	Uncharacterized protein OS=Staphylococcus epidermidis M23864:W2(grey) OX=525375 GN=HMPREF0794_0094 PE=4 SV=1	HMPREF0794_0094	65.756	32.4	15	5	47	0.987	0.992	0.98	0.987	1.024	1.018	0.977	0.123369
A0A7I0AQG1	PTS transporter subunit IIC OS=Staphylococcus epidermidis OX=1282 GN=CP553_07040 PE=4 SV=1	CP553_07040	37.468	5.4	2	1	2
Q5HLK5	Oxygen sensor histidine kinase NreB OS=Staphylococcus epidermidis (strain ATCC 35984 / RP62A) OX=176279 GN=nreB PE=3 SV=1	nreB	88.911	26.2	17	1	27
A0A509LQB0	Replication protein OS=Staphylococcus epidermidis OX=1282 GN=D9V05_13650 PE=4 SV=1	D9V05_13650	36.876	32.8	8	8	9	1.097	0.918	0.928	0.998	1.034	1.087	0.884	0.0180196
A0A1U9X4B1	Transposase OS=Staphylococcus epidermidis OX=1282 GN=tnp PE=4 SV=1	tnp	42.151	3.1	1	1	1	0.961	0.979	1.028	0.914	1.125	1.025	0.939	0.337669
A0A0H2VI10	Integral membrane efflux protein OS=Staphylococcus epidermidis (strain ATCC 12228 / FDA PCI 1200) OX=176280 GN=SE_2010 PE=4 SV=1	SE_2010	85.214	12.1	9	1	16	0.903	1.013	0.992	1.159	0.988	0.95	1.114	0.127715
A0A7I0AAG5	RNA methyltransferase OS=Staphylococcus epidermidis OX=1282 GN=E1N12_00845 PE=4 SV=1	E1N12_00845	27.069	31.3	7	1	18	1.049	0.901	0.843	1.008	1.069	1.073	0.862	0.0457732
Q8CQ97	Lactonase drp35 OS=Staphylococcus epidermidis (strain ATCC 12228 / FDA PCI 1200) OX=176280 GN=drp35 PE=3 SV=1	drp35	36.142	42.2	9	9	28	1.098	0.922	0.872	0.992	1.065	1.076	0.86	0.0167018
D4FHV4	Response regulator receiver domain protein OS=Staphylococcus epidermidis M23864:W2(grey) OX=525375 GN=vraR PE=4 SV=1	vraR	23.624	34.3	7	4	9	0.884	1.106	1.014	0.956	1.047	1.002	1.049	0.504784
A0A0E1VFE8	DUF2154 domain-containing protein OS=Staphylococcus epidermidis W23144 OX=525376 GN=HMPREF0791_0250 PE=4 SV=1	HMPREF0791_0250	55.984	11.6	5	4	9	1.023	0.984	0.964	0.9	1.076	1.078	0.896	0.0264712
A0A0E1VBH3	30S ribosomal protein S13 OS=Staphylococcus epidermidis W23144 OX=525376 GN=rpsM PE=3 SV=1	rpsM	42.565	30.8	13	8	59	0.886	1.06	1.088	1.02	0.908	0.924	1.166	0.00238456
Q8CT04	UPF0358 protein SE_0811 OS=Staphylococcus epidermidis (strain ATCC 12228 / FDA PCI 1200) OX=176280 GN=SE_0811 PE=3 SV=1	SE_0811	10.409	12.1	1	1	2	1.392	0.707	0.59	0.839	1.398	1.21	0.534	0.00478893
Q8CPC6	Nuclease SbcCD subunit D OS=Staphylococcus epidermidis (strain ATCC 12228 / FDA PCI 1200) OX=176280 GN=sbcD PE=3 SV=1	sbcD	43.553	20.1	7	7	13	1.016	1.026	0.982	1.009	0.953	1.016	1.011	0.682387
Q8CN91	Probable malate:quinone oxidoreductase 1 OS=Staphylococcus epidermidis (strain ATCC 12228 / FDA PCI 1200) OX=176280 GN=mqo1 PE=3 SV=2	mqo1	55.031	48.8	22	22	42	1.028	0.991	0.97	1.046	0.978	0.98	1.007	0.819176
A0A0H2WWF2	AAA_27 domain-containing protein OS=Staphylococcus aureus (strain COL) OX=93062 GN=SACOL1899 PE=4 SV=1	SACOL1899	153.46	5.9	8	1	21	1.161	0.916	0.889	0.95	1.07	1.044	0.841	0.00999302
Q5HRC1	Uncharacterized protein OS=Staphylococcus epidermidis (strain ATCC 35984 / RP62A) OX=176279 GN=SERP0272 PE=4 SV=1	SERP0272	27.897	10.9	3	3	4	1.097	0.962	0.929	1.026	1.03	1.018	0.928	0.112125
A0A7H5C413	Uncharacterized protein OS=Staphylococcus epidermidis OX=1282 GN=F9B71_12285 PE=4 SV=1	F9B71_12285	15.931	42.1	7	7	16	1.488	0.692	0.576	0.787	1.332	1.223	0.508	0.00310267
Q8CNH0	Phosphoglucosamine mutase OS=Staphylococcus epidermidis (strain ATCC 12228 / FDA PCI 1200) OX=176280 GN=glmM PE=3 SV=1	glmM	49.215	57.9	18	18	86	1.039	0.994	0.955	0.991	1.015	1.017	0.957	0.0425641
A0A7U0ACB4	Thiazole synthase OS=Staphylococcus epidermidis OX=1282 GN=I6I40_03590 PE=4 SV=1	I6I40_03590	72.099	15.1	6	1	9	0.988	1.021	1.042	1.046	0.928	0.982	1.073	0.0295549
D4FP50	30S ribosomal protein S10 OS=Staphylococcus epidermidis M23864:W2(grey) OX=525375 GN=rpsJ PE=3 SV=1	rpsJ	62.016	15.5	9	6	44	0.934	1.048	1.091	1.04	0.932	0.936	1.135	0.00107046
D4FM07	DUF4352 domain-containing protein OS=Staphylococcus epidermidis M23864:W2(grey) OX=525375 GN=HMPREF0794_1595 PE=4 SV=1	HMPREF0794_1595	23.348	58.5	11	1	34	1.176	0.825	0.546	0.992	1.325	1.238	0.632	0.053516
Q8CRN4	Uracil phosphoribosyltransferase OS=Staphylococcus epidermidis (strain ATCC 12228 / FDA PCI 1200) OX=176280 GN=upp PE=3 SV=1	upp	23.046	75.1	12	8	102	1.041	0.993	0.963	0.968	1.03	1.039	0.94	0.00353042
D4FHG6	Tex-like protein N-terminal domain protein OS=Staphylococcus epidermidis M23864:W2(grey) OX=525375 GN=yhgF PE=4 SV=1	yhgF	109.4	33.4	30	1	48	1.052	0.959	0.862	1.165	1.048	0.945	0.981	0.79609
A0A0H2VI56	Glycine betaine aldehyde dehydrogenase gbsA OS=Staphylococcus epidermidis (strain ATCC 12228 / FDA PCI 1200) OX=176280 GN=SE_2166 PE=3 SV=1	SE_2166	54.606	70.6	28	28	164	1.01	0.994	0.99	1.027	0.989	0.99	1.007	0.619514
A0A0H2WX37	DNA repair exonuclease family protein OS=Staphylococcus aureus (strain COL) OX=93062 GN=SACOL1900 PE=4 SV=1	SACOL1900	46.224	1.8	1	1	1	1.018	0.996	1.032	0.977	0.989	1.007	0.997	0.869313
A0A2Z5HSL4	dUTPase OS=Staphylococcus phage Lorac OX=2234038 GN=Lorac_062 PE=4 SV=1	Lorac_062	20.673	9.6	1	1	1
A0A0H2WZM7	Anaerobic ribonucleoside-triphosphate reductase OS=Staphylococcus aureus (strain COL) OX=93062 GN=nrdD PE=4 SV=1	nrdD	70.479	5.4	3	1	9
A0A4Y4YQC1	Uncharacterized protein OS=Staphylococcus epidermidis OX=1282 GN=CP553_10180 PE=4 SV=1	CP553_10180	18.859	40.2	10	1	67	1.212	0.728	0.762	0.52	1.389	1.454	0.496	0.00574134
Q8CRD1	Lysostaphin resistance protein A OS=Staphylococcus epidermidis (strain ATCC 12228 / FDA PCI 1200) OX=176280 GN=lyrA PE=3 SV=1	lyrA	43.176	12.3	6	1	11	1.207	0.9	0.794	1.103	1.267	0.807	0.852	0.434124
Q8CMT7	Dihydropteroate synthase OS=Staphylococcus epidermidis (strain ATCC 12228 / FDA PCI 1200) OX=176280 GN=folP PE=3 SV=1	folP	30.368	72.1	16	16	91	0.981	0.994	0.999	1.049	1.011	0.997	1.018	0.418392
A0A7I0BA76	DUF1700 domain-containing protein (Fragment) OS=Staphylococcus epidermidis OX=1282 GN=E1N10_13360 PE=4 SV=1	E1N10_13360	17.279	16.4	2	2	2
Q8CN75	Oxygen regulatory protein NreC OS=Staphylococcus epidermidis (strain ATCC 12228 / FDA PCI 1200) OX=176280 GN=nreC PE=3 SV=1	nreC	24.517	37.2	6	6	10	0.848	1.166	1.111	1.118	0.859	0.867	1.319	7.36685e-05
Q5HP16	Octanoyltransferase LipM OS=Staphylococcus epidermidis (strain ATCC 35984 / RP62A) OX=176279 GN=lipM PE=3 SV=1	lipM	32.013	55.1	13	13	30	1.02	0.996	1.003	0.998	1.007	0.99	0.993	0.500398
Q5HL72	Pyruvate oxidase OS=Staphylococcus epidermidis (strain ATCC 35984 / RP62A) OX=176279 GN=SERP2115 PE=3 SV=1	SERP2115	64.067	61.3	27	1	189	0.978	1.106	1.088	1.019	0.876	0.921	1.158	0.0221886
A0A509LUZ0	Pyruvate carboxylase OS=Staphylococcus epidermidis OX=1282 GN=D9V05_00030 PE=4 SV=1	D9V05_00030	129.5	67.3	61	2	256	0.961	1.07	1.037	1.026	0.93	0.942	1.106	0.00312545
Q5HJZ4	Beta sliding clamp OS=Staphylococcus aureus (strain COL) OX=93062 GN=dnaN PE=3 SV=1	dnaN	41.913	19.6	8	1	20	0.991	1.032	1.088	1.046	0.959	0.892	1.114	0.0357415
A0A7I0BK19	Uncharacterized protein OS=Staphylococcus epidermidis OX=1282 GN=CP553_03760 PE=4 SV=1	CP553_03760	48.858	7.4	3	2	4	1.369	0.697	0.675	0.637	1.374	1.383	0.487	1.09038e-05
Q8CPT8	Uncharacterized protein SE_0665 OS=Staphylococcus epidermidis (strain ATCC 12228 / FDA PCI 1200) OX=176280 GN=SE_0665 PE=3 SV=1	SE_0665	33.221	88	22	22	177	1.055	0.968	0.943	0.97	1.054	1.046	0.913	0.00066079
Q5HRP9	S4 domain protein OS=Staphylococcus epidermidis (strain ATCC 35984 / RP62A) OX=176279 GN=SERP0144 PE=4 SV=1	SERP0144	9.8873	46	4	4	15	0.964	1.037	1.058	1.058	0.978	0.958	1.087	0.000765482
D4FLE3	Acyl-CoA synthetase OS=Staphylococcus epidermidis M23864:W2(grey) OX=525375 GN=HMPREF0794_1381 PE=3 SV=1	HMPREF0794_1381	314.59	32.7	71	2	153	1.006	0.977	1.016	1.02	1.016	0.986	1.002	0.928947
Q8CS95	Adenine phosphoribosyltransferase OS=Staphylococcus epidermidis (strain ATCC 12228 / FDA PCI 1200) OX=176280 GN=apt PE=3 SV=1	apt	19.034	64	10	10	50	1.023	0.949	0.916	1.021	1.066	1.033	0.924	0.0813001
A0A7T9WSR8	DUF1934 family protein OS=Staphylococcus epidermidis OX=1282 GN=I6I40_00450 PE=4 SV=1	I6I40_00450	16.231	15.9	2	2	5	1.335	0.715	0.468	1.196	1.285	1.114	0.637	0.132872
D4FMU6	Uncharacterized protein OS=Staphylococcus epidermidis M23864:W2(grey) OX=525375 GN=HMPREF0794_1884 PE=3 SV=1	HMPREF0794_1884	41.788	37.2	12	6	85	0.906	1.075	1.074	1.062	0.907	0.936	1.168	0.000165949
A0A4Q9W791	Acetoacetyl-CoA thiolase OS=Staphylococcus epidermidis OX=1282 GN=CP553_00425 PE=3 SV=1	CP553_00425	78.506	44.5	23	18	75	0.983	1.022	1.002	1.008	1	0.996	1.018	0.0870889
Q8CQ69	3-hexulose-6-phosphate synthase OS=Staphylococcus epidermidis (strain ATCC 12228 / FDA PCI 1200) OX=176280 GN=SE_0341 PE=3 SV=1	SE_0341	22.371	78.6	11	9	78	0.93	1.054	1.068	1.047	0.94	0.948	1.125	0.000128673
A0A0E1VHW8	Lysine--tRNA ligase OS=Staphylococcus epidermidis W23144 OX=525376 GN=lysS PE=3 SV=1	lysS	77.369	61.2	39	24	232	0.974	1.01	1.019	1.002	0.968	0.983	1.036	0.00572021
Q8CSP0	Uncharacterized protein SE_1034 OS=Staphylococcus epidermidis (strain ATCC 12228 / FDA PCI 1200) OX=176280 GN=SE_1034 PE=3 SV=1	SE_1034	11.616	36.7	3	3	5	1.09	0.972	0.885	0.967	1.064	0.998	0.896	0.0520584
Q5HQ62	Inositol monophosphatase family protein OS=Staphylococcus epidermidis (strain ATCC 35984 / RP62A) OX=176279 GN=SERP0694 PE=4 SV=1	SERP0694	115.66	28.9	30	1	63	1.033	1.063	1.004	1.007	0.889	1.012	1.048	0.391974
Q8CMP5	5-methyltetrahydropteroyltriglutamate--homocysteine methyltransferase OS=Staphylococcus epidermidis (strain ATCC 12228 / FDA PCI 1200) OX=176280 GN=metE PE=3 SV=1	metE	85.928	48.5	34	4	100	0.79	1.2	1.231	1.177	0.75	0.796	1.545	4.43259e-05
Q5HRF6	Octanoyl-[GcvH]:protein N-octanoyltransferase OS=Staphylococcus epidermidis (strain ATCC 35984 / RP62A) OX=176279 GN=lipL PE=3 SV=1	lipL	31.976	21.1	6	6	6	0.979	1.1	1.067	0.976	0.898	0.942	1.115	0.0686975
Q5HRR1	Uncharacterized protein OS=Staphylococcus epidermidis (strain ATCC 35984 / RP62A) OX=176279 GN=SERP0132 PE=4 SV=1	SERP0132	9.9601	34.5	3	3	8	0.954	1.018	0.966	1.09	0.97	0.922	1.08	0.116045
Q8CNU8	Leucine--tRNA ligase OS=Staphylococcus epidermidis (strain ATCC 12228 / FDA PCI 1200) OX=176280 GN=leuS PE=3 SV=2	leuS	92.163	42.7	29	29	98	1.023	0.971	0.976	1.008	1.022	1.022	0.963	0.0332472
Q5HKT2	EIIA OS=Staphylococcus epidermidis (strain ATCC 35984 / RP62A) OX=176279 GN=SERP2260 PE=4 SV=1	SERP2260	69.575	2.9	2	2	3
A0A7I0AXK4	Uncharacterized protein OS=Staphylococcus epidermidis OX=1282 GN=E1M98_10945 PE=4 SV=1	E1M98_10945	5.8989	38.5	3	2	13	0.917	1.029	1.089	1.048	0.93	0.948	1.133	0.00296509
A0A0H2VEP8	N-acetyltransferase domain-containing protein OS=Staphylococcus epidermidis (strain ATCC 12228 / FDA PCI 1200) OX=176280 GN=SE_0314 PE=4 SV=1	SE_0314	15.708	12.8	2	1	2
Q5HRR8	MTS domain-containing protein OS=Staphylococcus epidermidis (strain ATCC 35984 / RP62A) OX=176279 GN=SERP0125 PE=4 SV=1	SERP0125	216.85	29.3	51	5	127	0.911	1.094	1.27	1.037	0.857	0.841	1.304	0.0159488
A0A7I0AJQ9	L-lactate dehydrogenase OS=Staphylococcus epidermidis OX=1282 GN=ldh PE=3 SV=1	ldh	34.083	45.9	14	1	119	1.056	0.899	0.847	1.094	1.107	1.042	0.886	0.186145
A0A0E1VBF1	50S ribosomal protein L15 OS=Staphylococcus epidermidis W23144 OX=525376 GN=rplO PE=3 SV=1	rplO	90.115	24.8	23	13	92	1.029	0.983	0.991	0.999	1.003	1.008	0.978	0.0711838
Q5HG65	DNA topoisomerase 4 subunit B OS=Staphylococcus aureus (strain COL) OX=93062 GN=parE PE=3 SV=2	parE	74.363	24.7	17	1	30	1.093	0.97	1.003	0.91	1.068	0.996	0.913	0.0853223
A0A0E1VLK4	Thymidylate synthase OS=Staphylococcus epidermidis W23144 OX=525376 GN=thyA PE=3 SV=1	thyA	67.35	26	16	1	32	1.036	0.993	1.039	0.918	1.07	0.976	0.957	0.38104
Q5HLE2	Short chain dehydrogenase/reductase family protein OS=Staphylococcus epidermidis (strain ATCC 35984 / RP62A) OX=176279 GN=SERP2045 PE=4 SV=1	SERP2045	29.215	51.8	8	8	13	0.93	1.058	1.123	1.116	0.913	0.906	1.199	0.000890194
Q5HL67	Secretory antigen SsaA-related protein OS=Staphylococcus epidermidis (strain ATCC 35984 / RP62A) OX=176279 GN=SERP2120 PE=4 SV=1	SERP2120	16.632	28.7	4	4	7	1.552	0.676	0.587	0.76	1.408	1.206	0.486	0.00231449
Q8CQU3	Methionine--tRNA ligase OS=Staphylococcus epidermidis (strain ATCC 12228 / FDA PCI 1200) OX=176280 GN=metG PE=3 SV=1	metG	75.116	50.6	31	1	128	1.042	1.014	0.914	1.004	1.018	1.034	0.948	0.18001
D4FHQ9	Uncharacterized protein OS=Staphylococcus epidermidis M23864:W2(grey) OX=525375 GN=HMPREF0794_0097 PE=4 SV=1	HMPREF0794_0097	12.175	77.1	6	6	9	0.943	1.018	1.006	1.018	0.971	0.998	1.045	0.0594891
Q8CSX5	Purine nucleoside phosphorylase SE_0862 OS=Staphylococcus epidermidis (strain ATCC 12228 / FDA PCI 1200) OX=176280 GN=SE_0862 PE=3 SV=1	SE_0862	30.306	33.8	8	4	22	0.944	0.95	1.076	0.95	1.004	1.038	0.997	0.935084
Q8CS75	Translation initiation factor IF-3 OS=Staphylococcus epidermidis (strain ATCC 12228 / FDA PCI 1200) OX=176280 GN=infC PE=3 SV=1	infC	20.269	54.3	9	1	35	0.926	1.093	1.099	1.049	0.915	0.911	1.178	0.000456466
Q5HN22	Nicotinate phosphoribosyltransferase OS=Staphylococcus epidermidis (strain ATCC 35984 / RP62A) OX=176279 GN=SERP1450 PE=3 SV=1	SERP1450	102.14	42.1	37	5	91	0.981	0.984	1.005	0.946	0.907	1.03	1.006	0.875426
D4FNE7	AHS1 domain-containing protein OS=Staphylococcus epidermidis M23864:W2(grey) OX=525375 GN=HMPREF0794_2085 PE=4 SV=1	HMPREF0794_2085	28.144	23.9	6	6	10	1.002	0.96	1	1.039	1.019	0.995	0.994	0.810445
Q8CSI0	Nucleoside diphosphate kinase OS=Staphylococcus epidermidis (strain ATCC 12228 / FDA PCI 1200) OX=176280 GN=ndk PE=3 SV=2	ndk	16.749	67.1	9	9	30	1.001	1.015	1.003	1.034	0.998	1.005	1.016	0.157449
Q5HLE6	Glutamate synthase-related protein OS=Staphylococcus epidermidis (strain ATCC 35984 / RP62A) OX=176279 GN=SERP2041 PE=3 SV=1	SERP2041	58.475	10.3	6	5	7	1.137	0.939	1.014	0.982	1	1.018	0.93	0.196268
Q8CRT9	ATP-dependent DNA helicase PcrA OS=Staphylococcus epidermidis (strain ATCC 12228 / FDA PCI 1200) OX=176280 GN=pcrA PE=3 SV=1	pcrA	83.811	58.8	36	36	75	0.927	1.056	1.06	1.058	0.928	0.954	1.13	0.00020669
A0A7U0ABY9	Uncharacterized protein OS=Staphylococcus epidermidis OX=1282 GN=I6I40_03160 PE=4 SV=1	I6I40_03160	32.616	14.7	3	3	6	1.078	0.908	0.854	0.974	1.101	1.055	0.846	0.0134768
Q5HQ48	Uncharacterized protein OS=Staphylococcus epidermidis (strain ATCC 35984 / RP62A) OX=176279 GN=SERP0709 PE=4 SV=1	SERP0709	16.565	22.9	3	3	4	0.998	1.037	1.008	1.037	0.98	0.956	1.05	0.0344965
Q5HR99	Uncharacterized protein OS=Staphylococcus epidermidis (strain ATCC 35984 / RP62A) OX=176279 GN=SERP0294 PE=4 SV=1	SERP0294	103.53	12.6	11	1	19
Q8CRJ0	30S ribosomal protein S9 OS=Staphylococcus epidermidis (strain ATCC 12228 / FDA PCI 1200) OX=176280 GN=rpsI PE=3 SV=1	rpsI	14.646	51.5	4	4	37	1.013	1.023	0.972	1.003	0.992	1.002	0.997	0.8527
A0A0H2VJ52	Uncharacterized protein OS=Staphylococcus epidermidis (strain ATCC 12228 / FDA PCI 1200) OX=176280 GN=SE_p304 PE=4 SV=1	SE_p304	15.158	40.9	7	7	39	0.961	1.011	1.04	1.046	0.97	0.986	1.062	0.00980797
Q5HL34	2-dehydropantoate 2-reductase OS=Staphylococcus epidermidis (strain ATCC 35984 / RP62A) OX=176279 GN=SERP2153 PE=3 SV=1	SERP2153	33.156	22.8	5	4	11	0.958	0.98	1.038	1.034	0.92	0.954	1.078	0.0297478
A0A7T9WQR9	Protoporphyrinogen oxidase OS=Staphylococcus epidermidis OX=1282 GN=I6I40_06705 PE=4 SV=1	I6I40_06705	52.194	44.1	17	3	38	0.929	1.029	1.202	1.02	0.852	0.959	1.186	0.0571557
Q5HLP5	Uncharacterized protein OS=Staphylococcus epidermidis (strain ATCC 35984 / RP62A) OX=176279 GN=SERP1940 PE=4 SV=1	SERP1940	15.297	30.2	3	3	5	1.101	0.922	0.845	1.088	1.049	1.05	0.892	0.190516
A0A0H2VIZ3	Uncharacterized protein OS=Staphylococcus epidermidis (strain ATCC 12228 / FDA PCI 1200) OX=176280 GN=SE_p403 PE=4 SV=1	SE_p403	10.424	75.3	6	6	29	0.936	1.027	1.049	1.03	0.948	0.967	1.089	0.00177144
D4FLN7	Uncharacterized protein OS=Staphylococcus epidermidis M23864:W2(grey) OX=525375 GN=HMPREF0794_1475 PE=4 SV=1	HMPREF0794_1475	9.0174	40	2	2	6	1.001	0.967	1.077	0.964	0.975	1.041	0.997	0.927744
Q5HKB3	Metallo-beta-lactamase family protein OS=Staphylococcus epidermidis (strain ATCC 35984 / RP62A) OX=176279 GN=SERP2435 PE=4 SV=1	SERP2435	90.793	16.4	9	9	9	0.98	0.922	1.019	1.073	1.028	0.99	1.005	0.942912
A0A3G1RL81	Uncharacterized protein OS=Staphylococcus epidermidis OX=1282 PE=4 SV=1	--	22.286	10.1	1	1	1
Q5HQI7	FeS_assembly_P domain-containing protein OS=Staphylococcus epidermidis (strain ATCC 35984 / RP62A) OX=176279 GN=SERP0562 PE=4 SV=1	SERP0562	182.47	37.9	50	7	294	1.011	0.988	0.972	1.018	0.996	1.004	0.989	0.475243
D4FHM3	Probable DNA-directed RNA polymerase subunit delta OS=Staphylococcus epidermidis M23864:W2(grey) OX=525375 GN=rpoE PE=3 SV=1	rpoE	106.53	24.9	20	9	109	1.11	0.902	0.929	0.948	1.091	1.074	0.849	0.000684932
A0A1S6KVE1	Amidase OS=Staphylococcus phage St 134 OX=1958922 PE=4 SV=1	--	51.435	4.4	2	2	3	1.026	0.979	0.968	0.904	1.054	1.101	0.896	0.0273243
Q5HQW2	Gluconeogenesis factor OS=Staphylococcus epidermidis (strain ATCC 35984 / RP62A) OX=176279 GN=SERP0434 PE=3 SV=1	SERP0434	35.829	45.7	9	9	17	0.965	0.983	0.998	1.006	0.968	1.048	1.002	0.927399
Q8CTF2	Ribosome hibernation promotion factor OS=Staphylococcus epidermidis (strain ATCC 12228 / FDA PCI 1200) OX=176280 GN=hpf PE=3 SV=1	hpf	22.063	40.2	7	7	22	1.058	1.052	1.054	1.018	0.938	0.936	1.065	0.197095
A0A2G7HYI8	ATP-dependent Clp protease ATP-binding subunit ClpX OS=Staphylococcus epidermidis OX=1282 GN=clpX PE=3 SV=1	clpX	88.841	31.8	24	17	107	0.967	1.016	1.032	1.017	0.988	0.982	1.044	0.00635246
Q8CQ83	DNA-directed RNA polymerase subunit beta' OS=Staphylococcus epidermidis (strain ATCC 12228 / FDA PCI 1200) OX=176280 GN=rpoC PE=3 SV=1	rpoC	135.26	72.9	90	34	370	0.953	1.044	1.029	1.033	0.953	0.956	1.085	5.15364e-05
Q5HM46	Uncharacterized protein OS=Staphylococcus epidermidis (strain ATCC 35984 / RP62A) OX=176279 GN=SERP1783 PE=4 SV=1	SERP1783	9.1658	25.3	1	1	2	0.917	1.121	1.037	1.144	0.861	0.906	1.23	0.00438491
A0A7T9WT41	Efflux RND transporter periplasmic adaptor subunit OS=Staphylococcus epidermidis OX=1282 GN=I6I40_01705 PE=4 SV=1	I6I40_01705	40.612	22.8	8	1	9	1.019	1.374	0.805	0.774	1.048	1.003	0.962	0.707874
A0A0H2VHG6	Riboflavin biosynthesis protein OS=Staphylococcus epidermidis (strain ATCC 12228 / FDA PCI 1200) OX=176280 GN=SE_0949 PE=3 SV=1	SE_0949	68.461	25.4	16	1	37
Q8CSV1	UPF0122 protein SE_0911 OS=Staphylococcus epidermidis (strain ATCC 12228 / FDA PCI 1200) OX=176280 GN=SE_0911 PE=3 SV=1	SE_0911	13.533	50	7	7	7	0.979	1.012	1.053	0.997	0.975	1.01	1.033	0.176339
A0A0H2VFH6	Uncharacterized protein OS=Staphylococcus epidermidis (strain ATCC 12228 / FDA PCI 1200) OX=176280 GN=SE_0693 PE=4 SV=1	SE_0693	23.535	61.2	9	4	42	1.14	0.913	0.843	0.956	1.112	1.056	0.82	0.00982459
Q5HS03	Trans-sulfuration enzyme family protein OS=Staphylococcus epidermidis (strain ATCC 35984 / RP62A) OX=176279 GN=SERP0036 PE=3 SV=1	SERP0036	42.922	11.8	4	4	5	0.764	1.213	1.177	1.216	0.783	0.78	1.55	4.57629e-06
A0A4V2KVF2	DNA mismatch repair protein MutS OS=Staphylococcus epidermidis OX=1282 GN=mutS PE=3 SV=1	mutS	100.76	50.2	40	1	91
D4FIW1	Uncharacterized protein OS=Staphylococcus epidermidis M23864:W2(grey) OX=525375 GN=HMPREF0794_0612 PE=4 SV=1	HMPREF0794_0612	13.406	8.1	1	1	1	1.121	0.962	0.799	1.109	1.05	1.004	0.904	0.338123
A0A7H5C3Y6	Uncharacterized protein OS=Staphylococcus epidermidis OX=1282 GN=F9B71_12510 PE=4 SV=1	F9B71_12510	16.026	51.9	7	7	14	0.987	1.02	1.031	0.985	0.987	0.956	1.036	0.111298
Q8CMQ1	Alkyl hydroperoxide reductase subunit F OS=Staphylococcus epidermidis (strain ATCC 12228 / FDA PCI 1200) OX=176280 GN=ahpF PE=3 SV=1	ahpF	54.669	59.6	21	16	111	0.968	1.049	1.012	1.028	0.987	0.971	1.056	0.0107765
A0A0E1VP48	[Ribosomal protein S18]-alanine N-acetyltransferase (Fragment) OS=Staphylococcus epidermidis W23144 OX=525376 GN=HMPREF0791_0344 PE=3 SV=1	HMPREF0791_0344	12.07	10.5	1	1	1
D4FIY8	Ribosome biogenesis GTPase YqeH OS=Staphylococcus epidermidis M23864:W2(grey) OX=525375 GN=yqeH PE=4 SV=1	yqeH	89.841	31	19	1	49	0.846	1.126	1.113	0.993	0.96	0.952	1.172	0.0501948
A0A2G7HZY7	Glycosyltransferase family 2 protein OS=Staphylococcus epidermidis OX=1282 GN=D9V05_03390 PE=4 SV=1	D9V05_03390	40.483	46.6	13	1	38	1.176	0.923	0.83	1.065	1.06	1.03	0.863	0.141602
Q8CMK8	Membrane protein insertase YidC 1 OS=Staphylococcus epidermidis (strain ATCC 12228 / FDA PCI 1200) OX=176280 GN=yidC1 PE=3 SV=1	yidC1	33.747	18.3	6	6	15	0.987	1.017	1.081	0.994	0.962	0.99	1.052	0.132649
A0A0E1VGP0	Lactose phosphotransferase system repressor OS=Staphylococcus epidermidis W23144 OX=525376 GN=HMPREF0791_0586 PE=4 SV=1	HMPREF0791_0586	101.92	17	13	1	24	0.812	1.112	1.236	0.991	0.885	0.94	1.266	0.0380219
A0A0E1VDB0	LysM domain protein OS=Staphylococcus epidermidis W23144 OX=525376 GN=sle1 PE=4 SV=1	sle1	77.685	43.2	22	14	137	1.398	0.663	0.624	0.598	1.42	1.394	0.448	1.22291e-05
A0A0H2VIY8	Mobilization protein OS=Staphylococcus epidermidis (strain ATCC 12228 / FDA PCI 1200) OX=176280 GN=SE_p306 PE=4 SV=1	SE_p306	40.199	17.2	5	5	5	1.074	0.997	0.864	1.05	1.08	0.968	0.932	0.350937
Q8CNP3	DNA polymerase IV OS=Staphylococcus epidermidis (strain ATCC 12228 / FDA PCI 1200) OX=176280 GN=dinB PE=3 SV=1	dinB	40.668	19.1	6	6	9	1.056	0.97	0.868	0.991	1.071	1.019	0.899	0.0692659
D2JG86	Replication initiation protein OS=Staphylococcus epidermidis OX=1282 GN=repC PE=3 SV=1	repC	37.642	39.2	12	10	31	1.051	0.928	0.926	0.942	1.042	1.066	0.885	0.000139848
A0A0H2WWD5	Epidermin immunity protein F OS=Staphylococcus aureus (strain COL) OX=93062 GN=epiF PE=4 SV=1	epiF	66.133	2	1	1	1	1	0.981	0.99	1.031	1.018	1.005	0.993	0.680203
Q8CSX1	Isoleucine--tRNA ligase OS=Staphylococcus epidermidis (strain ATCC 12228 / FDA PCI 1200) OX=176280 GN=ileS PE=3 SV=1	ileS	105.18	54.5	40	40	153	1.046	0.966	0.942	1.002	1.043	1.014	0.938	0.0346553
A0A0E1VPS8	MazG nucleotide pyrophosphohydrolase domain protein OS=Staphylococcus epidermidis W23144 OX=525376 GN=HMPREF0791_0116 PE=4 SV=1	HMPREF0791_0116	92.626	24.4	15	1	30	1.073	1.004	0.911	0.946	1.059	1.045	0.901	0.0227524
Q8CRH5	50S ribosomal protein L6 OS=Staphylococcus epidermidis (strain ATCC 12228 / FDA PCI 1200) OX=176280 GN=rplF PE=3 SV=1	rplF	19.664	60.1	10	8	74	1.001	1.015	0.987	1.082	0.968	0.944	1.059	0.15234
A0A0H2VJ62	Glycos_transf_1 domain-containing protein OS=Staphylococcus epidermidis (strain ATCC 12228 / FDA PCI 1200) OX=176280 GN=SE_1944 PE=4 SV=1	SE_1944	44.089	40	12	1	23	0.997	1.011	0.968	0.972	1.084	0.96	0.97	0.493773
Q8CMN4	Ribonuclease P protein component OS=Staphylococcus epidermidis (strain ATCC 12228 / FDA PCI 1200) OX=176280 GN=rnpA PE=3 SV=1	rnpA	13.484	13.9	2	2	3	1.061	1.041	0.983	1.043	0.972	0.918	1.039	0.437398
Q5HS20	Uncharacterized protein OS=Staphylococcus epidermidis (strain ATCC 35984 / RP62A) OX=176279 GN=SERP0019 PE=4 SV=1	SERP0019	121.17	23.8	18	4	46	1.023	0.952	1.065	1.027	0.945	0.946	1.045	0.363359
Q8CS46	UPF0354 protein SE_1416 OS=Staphylococcus epidermidis (strain ATCC 12228 / FDA PCI 1200) OX=176280 GN=SE_1416 PE=3 SV=1	SE_1416	33.059	25.4	7	7	15	0.976	1.039	1.031	1.041	0.958	0.982	1.067	0.00126635
D2JCR7	Signal peptidase I OS=Staphylococcus epidermidis OX=1282 GN=SAP110B_002 PE=3 SV=1	SAP110B_002	22.278	15.1	4	3	7	0.986	1.04	0.989	1.048	1.015	0.954	1.041	0.188032
A0A509LVB6	DUF3427 domain-containing protein OS=Staphylococcus epidermidis OX=1282 GN=D9V05_04410 PE=4 SV=1	D9V05_04410	110.57	26.9	25	8	30	1.082	1.014	0.988	1.022	0.961	0.986	0.998	0.991056
D2JCC2	ThiJ/PfpI family protein OS=Staphylococcus epidermidis OX=1282 GN=SAP107A_012 PE=3 SV=1	SAP107A_012	18.807	46.5	7	1	24	0.607	1.182	1.332	1.243	0.702	0.853	1.738	0.00580139
A0A0H2VIM4	Anaerobic ribonucleoside-triphosphate reductase OS=Staphylococcus epidermidis (strain ATCC 12228 / FDA PCI 1200) OX=176280 GN=SE_2172 PE=4 SV=1	SE_2172	70.252	39	26	1	62	0.857	1.057	1.02	1.132	1.013	0.921	1.15	0.0695832
A0A509LN09	Dihydrofolate reductase (Fragment) OS=Staphylococcus epidermidis OX=1282 GN=dfrC PE=3 SV=1	dfrC	18.333	65	7	2	14	1.152	0.885	0.785	1.08	1.07	1.088	0.831	0.113087
D4FHM8	Peptidase M20 domain-containing protein 2 OS=Staphylococcus epidermidis M23864:W2(grey) OX=525375 GN=HMPREF0794_0066 PE=3 SV=1	HMPREF0794_0066	43.061	28.2	9	7	18	0.822	1.12	1.186	1.152	0.832	0.816	1.4	4.2975e-05
Q8CNC9	Urease subunit alpha OS=Staphylococcus epidermidis (strain ATCC 12228 / FDA PCI 1200) OX=176280 GN=ureC PE=3 SV=1	ureC	62.084	67.1	23	23	138	1.138	0.906	0.894	0.882	1.129	1.092	0.798	0.000109974
Q8CP34	Elongation factor P OS=Staphylococcus epidermidis (strain ATCC 12228 / FDA PCI 1200) OX=176280 GN=efp PE=3 SV=1	efp	20.593	82.7	12	1	90	1.066	0.962	0.898	0.982	0.987	1.087	0.905	0.0674646
Q5HQU6	Ribonuclease R OS=Staphylococcus epidermidis (strain ATCC 35984 / RP62A) OX=176279 GN=rnr PE=3 SV=1	rnr	91.093	45.7	37	37	69	0.963	1.031	1.036	1.047	0.949	0.98	1.077	0.00201781
Q5HMB2	UDP-N-acetylglucosamine 2-epimerase OS=Staphylococcus epidermidis (strain ATCC 35984 / RP62A) OX=176279 GN=SERP1717 PE=3 SV=1	SERP1717	43.149	39.9	13	13	44	1.033	1.017	0.942	1.018	0.993	1.021	0.977	0.447578
Q5HP95	Uncharacterized protein OS=Staphylococcus epidermidis (strain ATCC 35984 / RP62A) OX=176279 GN=SERP1018 PE=4 SV=1	SERP1018	13.133	17.3	2	2	2	0.715	1.644	0.751	0.916	0.857	1.076	1.25	0.531921
Q5HLH5	Glycerate kinase 2 OS=Staphylococcus epidermidis (strain ATCC 35984 / RP62A) OX=176279 GN=garK PE=3 SV=1	garK	108.4	26.1	19	6	42	1.112	1.021	1.069	0.914	0.89	1	1.001	0.974944
Q9L4Z1	Dihydrolipoamide acetyltransferase component of pyruvate dehydrogenase complex OS=Staphylococcus epidermidis OX=1282 GN=pdhC PE=3 SV=1	pdhC	46.962	57.7	22	22	158	1.027	0.988	1.014	0.965	1.026	1.011	0.968	0.100076
I0B6K6	Mobilization protein OS=Staphylococcus epidermidis OX=1282 GN=rlx PE=4 SV=1	rlx	38.414	21.4	8	6	11	0.965	1.034	1.037	0.962	1.022	0.996	1.017	0.611603
A0A7I0B6U9	Phosphonates import ATP-binding protein PhnC OS=Staphylococcus epidermidis OX=1282 GN=phnC PE=3 SV=1	phnC	79.315	25.2	14	1	44	1.005	1.115	0.971	0.907	1.042	0.983	0.988	0.815397
A0A0H2VG23	Lysophospholipase OS=Staphylococcus epidermidis (strain ATCC 12228 / FDA PCI 1200) OX=176280 GN=SE_0980 PE=4 SV=1	SE_0980	79.593	16.8	11	2	23	0.957	1.042	1.1	1.002	0.948	0.954	1.1	0.0256434
Q5HQY7	Glycerate kinase family protein OS=Staphylococcus epidermidis (strain ATCC 35984 / RP62A) OX=176279 GN=SERP0409 PE=3 SV=1	SERP0409	41.948	38.6	10	10	42	1.135	0.916	0.838	0.979	1.139	1.064	0.819	0.0159389
A0A7I0AVS1	Ribonuclease 3 OS=Staphylococcus epidermidis OX=1282 GN=rnc PE=3 SV=1	rnc	73.5	38.7	21	11	54	1.03	0.998	0.978	0.991	1	1.015	0.974	0.067256
A0A0E1VG07	EVE domain-containing protein OS=Staphylococcus epidermidis W23144 OX=525376 GN=HMPREF0791_0074 PE=4 SV=1	HMPREF0791_0074	52.905	51.5	21	21	40	1.063	0.978	0.951	1.023	1.03	1.003	0.953	0.15242
A0A7Z1QVZ0	GNAT family N-acetyltransferase OS=Staphylococcus epidermidis OX=1282 GN=CP553_10080 PE=4 SV=1	CP553_10080	18.466	22.2	3	1	9
Q5HL64	Methylated-DNA--[protein]-cysteine S-methyltransferase OS=Staphylococcus epidermidis (strain ATCC 35984 / RP62A) OX=176279 GN=ogt PE=4 SV=1	ogt	19.322	38.4	9	9	12	1.069	0.958	0.93	0.992	1.071	1.007	0.915	0.0322924
Q8CP16	Protein GrpE OS=Staphylococcus epidermidis (strain ATCC 12228 / FDA PCI 1200) OX=176280 GN=grpE PE=3 SV=1	grpE	24.035	52.9	11	11	78	0.898	1.068	1.083	1.09	0.897	0.917	1.195	4.48699e-05
A0A7I0BKE7	Arginine-ornithine antiporter OS=Staphylococcus epidermidis OX=1282 GN=arcD PE=3 SV=1	arcD	50.039	3.5	1	1	1
A0A7I0ALA1	Serine acetyltransferase OS=Staphylococcus epidermidis OX=1282 GN=cysE PE=3 SV=1	cysE	23.663	38	6	1	10
A0A0H2WXB3	Uncharacterized protein OS=Staphylococcus aureus (strain COL) OX=93062 GN=SACOL2076 PE=4 SV=1	SACOL2076	50.837	3.2	1	1	2	0.66	1.294	1.544	0.859	0.728	0.839	1.66	0.0612872
Q5HL09	HTH-type transcriptional regulator OS=Staphylococcus epidermidis (strain ATCC 35984 / RP62A) OX=176279 GN=SERP2178 PE=3 SV=1	SERP2178	22.088	55.1	11	11	29	1.047	0.929	0.927	0.96	1.078	1.062	0.884	0.000929508
Q5HCU1	Oxygen-dependent choline dehydrogenase OS=Staphylococcus aureus (strain COL) OX=93062 GN=betA PE=3 SV=1	betA	132.23	9.6	11	2	98	1.524	0.611	0.533	0.756	1.398	1.337	0.446	0.00168475
Q5HRJ6	Ribulose-5-phosphate reductase OS=Staphylococcus epidermidis (strain ATCC 35984 / RP62A) OX=176279 GN=tarJ PE=3 SV=1	tarJ	130.47	15.1	16	1	59	0.997	1.033	0.942	1.018	1.041	0.993	0.987	0.70425
Q5HFI0	Chaperone protein DnaK OS=Staphylococcus aureus (strain COL) OX=93062 GN=dnaK PE=3 SV=1	dnaK	66.361	34.6	26	4	106	0.995	0.999	0.966	1.191	1.005	0.938	1.074	0.378039
A0A7T9WSU4	TatD family hydrolase OS=Staphylococcus epidermidis OX=1282 GN=I6I40_01150 PE=4 SV=1	I6I40_01150	29.385	41	8	1	22	0.907	1.076	1.071	1.08	0.892	0.928	1.183	0.000136142
A0A0H2WVA1	Uncharacterized protein OS=Staphylococcus aureus (strain COL) OX=93062 GN=SACOL0646 PE=4 SV=1	SACOL0646	24.12	4.9	1	1	2	0.737	1.253	1.379	0.872	0.753	0.949	1.437	0.0956305
Q5HN06	Uncharacterized protein OS=Staphylococcus epidermidis (strain ATCC 35984 / RP62A) OX=176279 GN=SERP1468 PE=4 SV=1	SERP1468	32.808	7.3	2	1	6	1.276	0.838	0.584	1.022	1.27	1.111	0.668	0.0659324
D4FIY1	Biotin-dependent carboxylase domain protein OS=Staphylococcus epidermidis M23864:W2(grey) OX=525375 GN=HMPREF0794_0395 PE=4 SV=1	HMPREF0794_0395	37.22	17.7	4	4	5	0.916	1.029	1.071	1.076	0.954	0.95	1.126	0.00344228
A0A6H3GPW6	DUF4355 domain-containing protein OS=Staphylococcus epidermidis OX=1282 GN=CP553_01555 PE=4 SV=1	CP553_01555	14.74	8	1	1	1
Q5HQQ1	FeS assembly protein SufD OS=Staphylococcus epidermidis (strain ATCC 35984 / RP62A) OX=176279 GN=sufD PE=3 SV=1	sufD	94.227	32.6	22	22	64	0.977	1.062	1.02	1.028	0.956	0.962	1.074	0.00683681
Q8CPY9	UvrABC system protein A OS=Staphylococcus epidermidis (strain ATCC 12228 / FDA PCI 1200) OX=176280 GN=uvrA PE=3 SV=1	uvrA	105.16	53.9	41	22	99	0.994	1.018	1.007	1.047	0.981	0.986	1.037	0.0398934
Q5HR75	LysM domain protein OS=Staphylococcus epidermidis (strain ATCC 35984 / RP62A) OX=176279 GN=SERP0318 PE=4 SV=1	SERP0318	28.229	42.5	6	6	14	1.526	0.549	0.563	0.595	1.451	1.422	0.388	7.48993e-06
Q8CPZ6	Peptidase T OS=Staphylococcus epidermidis (strain ATCC 12228 / FDA PCI 1200) OX=176280 GN=pepT PE=3 SV=1	pepT	46.311	44.2	15	14	61	1.035	0.972	0.974	0.956	1.034	1.047	0.931	0.000569053
Q5HLL8	DUF1722 domain-containing protein OS=Staphylococcus epidermidis (strain ATCC 35984 / RP62A) OX=176279 GN=SERP1969 PE=4 SV=1	SERP1969	14.939	12.8	2	2	2	1.001	0.983	0.974	1.004	1.064	1.003	0.965	0.184179
A0A7G9EDK6	Dihydrolipoyllysine-residue succinyltransferase component of 2-oxoglutarate dehydrogenase complex OS=Staphylococcus epidermidis OX=1282 GN=ATM22_06675 PE=3 SV=1	ATM22_06675	46.022	36	15	15	33	1.04	0.973	0.967	0.987	1.046	1.024	0.941	0.00230244
Q5HIC7	Elongation factor Tu OS=Staphylococcus aureus (strain COL) OX=93062 GN=tuf PE=3 SV=1	tuf	43.103	56.6	20	3	410	1.146	0.953	0.858	1.006	1.062	1.024	0.872	0.0729676
Q8CSS0	Glycerol kinase OS=Staphylococcus epidermidis (strain ATCC 12228 / FDA PCI 1200) OX=176280 GN=glpK PE=3 SV=1	glpK	56.325	54.3	20	14	94	1.011	0.996	0.98	0.994	1.002	1.026	0.977	0.0555345
Q8CT67	ClpXP adapter protein SpxH OS=Staphylococcus epidermidis (strain ATCC 12228 / FDA PCI 1200) OX=176280 GN=spxH PE=3 SV=2	spxH	31.25	8.3	2	2	3	0.772	1.108	1.242	1.018	0.819	0.899	1.353	0.0144258
Q8CTH8	7-cyano-7-deazaguanine synthase OS=Staphylococcus epidermidis (strain ATCC 12228 / FDA PCI 1200) OX=176280 GN=queC PE=3 SV=1	queC	25.171	37.2	7	7	14	0.937	1.122	1.13	1.141	0.861	0.863	1.275	0.000990393
A0A7H5C4B2	Pathogenicity island protein OS=Staphylococcus epidermidis OX=1282 GN=F9B71_11715 PE=4 SV=1	F9B71_11715	16.841	8	1	1	1
Q5HQT1	Cold shock protein CspA OS=Staphylococcus epidermidis (strain ATCC 35984 / RP62A) OX=176279 GN=SERP0466 PE=4 SV=1	SERP0466	7.344	89.4	6	6	25	1.019	0.995	1.004	0.997	0.975	1.013	0.996	0.817129
A0A0H2VIL0	ABC transporter (ATP-binding protein)-like protein OS=Staphylococcus epidermidis (strain ATCC 12228 / FDA PCI 1200) OX=176280 GN=SE_1550 PE=4 SV=1	SE_1550	65.288	23.9	12	1	18	1.038	1.013	0.998	0.926	1.08	0.906	0.971	0.674217
A0A0H2WZ87	Ribosomal RNA small subunit methyltransferase E OS=Staphylococcus aureus (strain COL) OX=93062 GN=SACOL1634 PE=3 SV=1	SACOL1634	107.77	1.8	2	1	4	1.529	0.572	0.511	0.494	1.505	1.57	0.343	2.00082e-05
Q5HKX6	Uncharacterized protein OS=Staphylococcus epidermidis (strain ATCC 35984 / RP62A) OX=176279 GN=SERP2211 PE=4 SV=1	SERP2211	3.7123	42.4	2	2	6	1.014	1.008	1.054	0.99	0.985	0.944	1.037	0.261383
Q5HRE2	HD domain protein OS=Staphylococcus epidermidis (strain ATCC 35984 / RP62A) OX=176279 GN=SERP0251 PE=4 SV=1	SERP0251	93.88	19.4	13	1	28
Q5HQC2	Aminotransferase OS=Staphylococcus epidermidis (strain ATCC 35984 / RP62A) OX=176279 GN=SERP0633 PE=3 SV=1	SERP0633	44.649	19.5	5	4	6	0.926	1.095	0.982	1.186	0.984	0.879	1.17	0.0716134
Q8CN92	Heme response regulator HssR OS=Staphylococcus epidermidis (strain ATCC 12228 / FDA PCI 1200) OX=176280 GN=hssR PE=3 SV=1	hssR	25.782	28.1	6	6	8	1.052	0.913	1.006	1.029	0.983	0.994	0.973	0.544065
Q8CPR3	Processive diacylglycerol beta-glucosyltransferase OS=Staphylococcus epidermidis (strain ATCC 12228 / FDA PCI 1200) OX=176280 GN=ugtP PE=3 SV=1	ugtP	44.776	12.5	3	3	3	0.923	1.044	0.914	1.131	1.014	0.911	1.085	0.32876
A0A1W5ZMQ9	DUF1541 domain-containing protein OS=Staphylococcus epidermidis OX=1282 GN=CP553_07435 PE=4 SV=1	CP553_07435	17.901	65.6	12	3	36	0.991	1.006	0.977	1.003	1.043	1.032	0.974	0.221029
A0A0E1VI06	Glutamine--fructose-6-phosphate aminotransferase [isomerizing] OS=Staphylococcus epidermidis W23144 OX=525376 GN=glmS PE=3 SV=1	glmS	96.098	35.1	29	28	133	1.054	0.967	0.943	0.992	1.035	1.016	0.935	0.019961
Q5HLY5	Glyoxalase-like_dom domain-containing protein OS=Staphylococcus epidermidis (strain ATCC 35984 / RP62A) OX=176279 GN=SERP1845 PE=4 SV=1	SERP1845	29.404	14.2	4	4	5	0.937	1.04	1.092	1.06	0.908	0.96	1.138	0.00383681
Q5HLR5	Amidohydrolase family protein OS=Staphylococcus epidermidis (strain ATCC 35984 / RP62A) OX=176279 GN=SERP1918 PE=4 SV=1	SERP1918	41.602	8.1	3	2	5	0.932	1.004	1.154	1.08	0.907	0.919	1.174	0.0178664
A0A0H2VJA1	Replication protein OS=Staphylococcus epidermidis (strain ATCC 12228 / FDA PCI 1200) OX=176280 GN=SE_p522 PE=4 SV=1	SE_p522	34.403	30.1	8	5	13	1.025	1.044	1.046	1.081	0.931	0.892	1.113	0.0628066
A0A0H2VE12	Cadmium resistance protein B OS=Staphylococcus epidermidis (strain ATCC 12228 / FDA PCI 1200) OX=176280 GN=SE_0075 PE=3 SV=1	SE_0075	87.015	50.2	36	36	129	0.987	1.01	1.006	1.008	0.991	1.017	1.01	0.361641
A0A7H5C4R2	UDP-N-acetylmuramoyl-tripeptide--D-alanyl-D-alanine ligase OS=Staphylococcus epidermidis OX=1282 GN=murF PE=3 SV=1	murF	50.171	56.5	25	1	89	0.954	1.057	1	1.026	0.948	1.022	1.054	0.139168
Q8CNE5	Probable molybdenum cofactor guanylyltransferase OS=Staphylococcus epidermidis (strain ATCC 12228 / FDA PCI 1200) OX=176280 GN=mobA PE=3 SV=1	mobA	23.314	14.9	3	3	3	1.068	1.015	0.972	0.948	1.006	1.02	0.949	0.121223
Q5HS17	Uncharacterized protein OS=Staphylococcus epidermidis (strain ATCC 35984 / RP62A) OX=176279 GN=SERP0022 PE=4 SV=1	SERP0022	14.307	54.8	4	4	17	1.123	0.914	0.956	0.919	1.12	1.107	0.833	0.000245025
A0A5R1C2G0	RepB family plasmid replication initiator protein OS=Staphylococcus epidermidis OX=1282 GN=E1N04_12180 PE=4 SV=1	E1N04_12180	34.774	15	5	4	6	1.062	0.944	0.904	0.977	1.111	1.055	0.875	0.00853559
Q8CP40	Arginine repressor OS=Staphylococcus epidermidis (strain ATCC 12228 / FDA PCI 1200) OX=176280 GN=argR PE=3 SV=2	argR	17.127	49.3	8	8	21	1.038	0.975	0.975	1.009	1.042	1.041	0.948	0.00964231
A0A7H5NL93	Lysostaphin resistance protein A OS=Staphylococcus epidermidis OX=1282 GN=ATM22_02615 PE=4 SV=1	ATM22_02615	43.176	12.8	7	2	14	1.048	0.992	0.924	0.977	1.062	0.935	0.95	0.33606
Q5HNT0	TPR domain protein OS=Staphylococcus epidermidis (strain ATCC 35984 / RP62A) OX=176279 GN=SERP1184 PE=4 SV=1	SERP1184	25.648	39.2	4	4	8	1.099	0.964	0.785	0.993	1.079	1.113	0.833	0.0652348
Q8CP76	Extracellular matrix-binding protein ebh OS=Staphylococcus epidermidis (strain ATCC 12228 / FDA PCI 1200) OX=176280 GN=ebh PE=4 SV=1	ebh	1050.8	0.8	5	1	5
Q8CPQ1	Bifunctional autolysin OS=Staphylococcus epidermidis (strain ATCC 12228 / FDA PCI 1200) OX=176280 GN=atl PE=3 SV=1	atl	148.28	67.8	71	1	360	1.757	0.529	0.356	0.575	1.537	1.459	0.307	0.00161868
Q5HRT6	Uncharacterized protein OS=Staphylococcus epidermidis (strain ATCC 35984 / RP62A) OX=176279 GN=SERP0106 PE=4 SV=1	SERP0106	41.311	4.6	2	2	2	0.756	1.542	1.027	0.964	0.894	0.775	1.457	0.0844825
Q5HPN5	GTPase HflX OS=Staphylococcus epidermidis (strain ATCC 35984 / RP62A) OX=176279 GN=hflX PE=3 SV=1	hflX	47.768	41.8	12	2	23	0.818	1.034	1.01	1.12	0.955	1.054	1.119	0.217989
A0A0D4ZYY8	Uncharacterized protein OS=Staphylococcus epidermidis OX=1282 PE=4 SV=1	--	30.905	3	1	1	1	1.063	0.944	0.917	0.898	1.151	1.079	0.838	0.00340006
Q8CMN5	tRNA modification GTPase MnmE OS=Staphylococcus epidermidis (strain ATCC 12228 / FDA PCI 1200) OX=176280 GN=mnmE PE=3 SV=1	mnmE	51.451	53.2	20	1	51	0.995	1.034	0.938	0.988	0.979	1.018	0.989	0.725865
Q5HNX6	PhoH family protein OS=Staphylococcus epidermidis (strain ATCC 35984 / RP62A) OX=176279 GN=SERP1138 PE=4 SV=1	SERP1138	76.791	31.8	19	13	59	0.978	1.015	1.036	1.009	0.98	0.976	1.043	0.006551
Q5HPY5	Uncharacterized protein OS=Staphylococcus epidermidis (strain ATCC 35984 / RP62A) OX=176279 GN=SERP0772 PE=4 SV=1	SERP0772	66.415	33	16	4	57	0.962	0.962	1.043	1.045	1.072	0.939	1.026	0.617304
Q8CTA3	UPF0051 protein SE_0610 OS=Staphylococcus epidermidis (strain ATCC 12228 / FDA PCI 1200) OX=176280 GN=SE_0610 PE=3 SV=1	SE_0610	52.538	58.7	22	22	76	0.943	1.033	1.041	1.03	0.966	0.974	1.077	0.00192786
A0A7G9EA52	Teichoic acid biosynthesis protein F OS=Staphylococcus epidermidis OX=1282 GN=ATM22_00210 PE=3 SV=1	ATM22_00210	90.626	44.4	38	37	79	1.021	0.972	0.976	1.009	1.039	1.03	0.957	0.026528
A0A0E1VCR8	Ribosomal RNA large subunit methyltransferase H OS=Staphylococcus epidermidis W23144 OX=525376 GN=rlmH PE=3 SV=1	rlmH	65.651	20.7	11	4	22	0.948	1.062	1.158	0.982	0.901	0.944	1.146	0.0554612
D4FIJ8	Putative pre-16S rRNA nuclease OS=Staphylococcus epidermidis M23864:W2(grey) OX=525375 GN=HMPREF0794_0386 PE=3 SV=1	HMPREF0794_0386	61.163	25.4	12	7	19	0.988	1.003	1.034	1.057	0.951	0.994	1.055	0.060232
Q8CS66	Acetyl-coenzyme A carboxylase carboxyl transferase subunit beta OS=Staphylococcus epidermidis (strain ATCC 12228 / FDA PCI 1200) OX=176280 GN=accD PE=3 SV=1	accD	31.88	62.1	16	1	55	0.974	1.05	1.06	0.862	1.175	0.916	0.97	0.783953
Q5HQB6	Uncharacterized protein OS=Staphylococcus epidermidis (strain ATCC 35984 / RP62A) OX=176279 GN=SERP0639 PE=4 SV=1	SERP0639	18.209	56.4	5	5	23	1.102	0.927	0.935	0.978	1.026	1.099	0.88	0.0112847
Q8CSH9	Demethylmenaquinone methyltransferase OS=Staphylococcus epidermidis (strain ATCC 12228 / FDA PCI 1200) OX=176280 GN=menG PE=3 SV=1	menG	27.194	47.7	8	8	23	0.977	1.009	0.995	1.008	1.01	1.01	1.005	0.691891
Q5HHB0	Chaperone protein ClpB OS=Staphylococcus aureus (strain COL) OX=93062 GN=clpB PE=3 SV=1	clpB	98.302	28	23	2	63	0.872	1.172	1.121	1.083	0.849	0.881	1.297	0.000511784
Q8CP23	DNA primase OS=Staphylococcus epidermidis (strain ATCC 12228 / FDA PCI 1200) OX=176280 GN=dnaG PE=3 SV=1	dnaG	70.421	41	24	3	41	1.05	0.944	0.896	1.052	1.043	1.012	0.931	0.206617
D4FNA1	LysR substrate binding domain protein OS=Staphylococcus epidermidis M23864:W2(grey) OX=525375 GN=HMPREF0794_2039 PE=3 SV=1	HMPREF0794_2039	32.86	23.2	6	6	10	1.016	0.963	1.018	1.05	1.052	0.983	0.993	0.841393
A0A7H5C4L8	S-ribosylhomocysteine lyase OS=Staphylococcus epidermidis OX=1282 GN=luxS PE=3 SV=1	luxS	17.643	42.9	5	1	56	1.137	0.932	0.926	0.917	1.102	1.039	0.847	0.00348033
A0A1Z1UYZ7	Regulatory protein OS=Staphylococcus epidermidis OX=1282 GN=merR PE=3 SV=1	merR	49.581	51.9	18	1	44
Q5HQA3	Phosphoribosylformylglycinamidine synthase subunit PurS OS=Staphylococcus epidermidis (strain ATCC 35984 / RP62A) OX=176279 GN=purS PE=3 SV=1	purS	9.793	59.3	3	3	19	1.093	0.92	0.824	0.973	1.192	1.097	0.803	0.0174427
D4FHN1	Phosphopentomutase OS=Staphylococcus epidermidis M23864:W2(grey) OX=525375 GN=deoB PE=3 SV=1	deoB	217.47	33.3	60	3	224	1.152	0.946	0.869	1.066	1.08	0.999	0.892	0.181831
Q5HNY4	CBS domain protein OS=Staphylococcus epidermidis (strain ATCC 35984 / RP62A) OX=176279 GN=SERP1130 PE=4 SV=1	SERP1130	23.761	37.7	7	7	17	1.052	0.981	0.954	1.018	1.027	1.03	0.95	0.0630575
D4FMM5	HTH-type transcriptional regulator NorG OS=Staphylococcus epidermidis M23864:W2(grey) OX=525375 GN=HMPREF0794_1813 PE=3 SV=1	HMPREF0794_1813	120.65	14.5	13	2	22	0.979	0.985	0.991	1.055	1.015	0.994	1.014	0.59776
Q8CPK0	Lipoprotein signal peptidase OS=Staphylococcus epidermidis (strain ATCC 12228 / FDA PCI 1200) OX=176280 GN=lspA PE=3 SV=2	lspA	18.235	11.2	1	1	1
Q5HQN8	5'-nucleotidase family protein OS=Staphylococcus epidermidis (strain ATCC 35984 / RP62A) OX=176279 GN=SERP0510 PE=3 SV=1	SERP0510	50.01	25.7	9	9	13	1.224	0.832	0.807	1.004	1.1	1.095	0.773	0.0280198
D4FP29	Molybdopterin-guanine dinucleotide biosynthesis protein B OS=Staphylococcus epidermidis M23864:W2(grey) OX=525375 GN=mobB PE=4 SV=1	mobB	50.082	10.5	4	1	6
Q5HS01	SpoOJ protein OS=Staphylococcus epidermidis (strain ATCC 35984 / RP62A) OX=176279 GN=SERP0038 PE=3 SV=1	SERP0038	32.46	21.8	5	5	9	0.979	1.027	1.105	1.139	0.826	0.943	1.19	0.0427614
A0A7I0AJV5	TIGR01212 family radical SAM protein OS=Staphylococcus epidermidis OX=1282 GN=E1N03_09095 PE=4 SV=1	E1N03_09095	36.289	30.3	8	1	18
D4FJG6	2-oxoglutarate ferredoxin oxidoreductase subunit beta OS=Staphylococcus epidermidis M23864:W2(grey) OX=525375 GN=porB PE=4 SV=1	porB	31.38	66.7	10	1	28	0.838	1.042	1.076	1.176	0.898	0.953	1.225	0.0173359
D2JC42	Replication-associated protein OS=Staphylococcus epidermidis OX=1282 GN=SAP105B_002 PE=4 SV=1	SAP105B_002	29.665	21.2	6	1	7
Q8CP98	Phosphate-binding protein PstS OS=Staphylococcus epidermidis (strain ATCC 12228 / FDA PCI 1200) OX=176280 GN=pstS PE=3 SV=1	pstS	35.947	48	16	16	45	1.041	0.978	0.968	0.974	1.031	1.043	0.937	0.000156973
Q8CPL5	Thioredoxin OS=Staphylococcus epidermidis (strain ATCC 12228 / FDA PCI 1200) OX=176280 GN=trxA PE=3 SV=1	trxA	11.443	80.8	10	10	77	0.976	1.038	1.053	0.968	0.979	0.985	1.04	0.209781
A0A0E1VF65	50S ribosomal protein L19 (Fragment) OS=Staphylococcus epidermidis W23144 OX=525376 GN=rplS PE=3 SV=1	rplS	12.811	41.1	6	6	16	0.944	1.072	1.111	0.998	0.95	0.948	1.119	0.024096

## Sheet: Peptide Quant
ID	Sequence	Length	Proteins	Protein accession	Protein description	Charge	m/z	Mass error [ppm]	Score	PEP	Unique [yes/no]	S_E_1	S_E_1_2MIC_P_1	S_E_1_2MIC_P_2	S_E_1_2MIC_P_3	S_E_2	S_E_3
0	AAAALILAGLVAEGTTQVTELK	22	Q8CRN6;Q5HMC2;D4FHJ6;A0A7I0AW49;A0A2G7HXX0;A0A7G9EC12;A0A7H5C4N2;A0A7I0BM56;A0A0E1VG29	Q8CRN6	UDP-N-acetylglucosamine 1-carboxyvinyltransferase 1 OS=Staphylococcus epidermidis (strain ATCC 12228 / FDA PCI 1200) OX=176280 GN=murA1 PE=3 SV=1	4	535.811	0.15977	94.384	5.82e-08	yes	0.822	1.267	0.872	1.183	0.818	1.039
1	AAAALILAGLVAEGTTQVTELK	22	Q8CRN6;Q5HMC2;D4FHJ6;A0A7I0AW49;A0A2G7HXX0;A0A7G9EC12;A0A7H5C4N2;A0A7I0BM56;A0A0E1VG29	Q8CRN6	UDP-N-acetylglucosamine 1-carboxyvinyltransferase 1 OS=Staphylococcus epidermidis (strain ATCC 12228 / FDA PCI 1200) OX=176280 GN=murA1 PE=3 SV=1	2	1070.61	0.20457	330.26	3.84e-219	yes	0.884	1.136	1.058	1.07	0.887	0.965
2	AAAALILAGLVAEGTTQVTELK	22	Q8CRN6;Q5HMC2;D4FHJ6;A0A7I0AW49;A0A2G7HXX0;A0A7G9EC12;A0A7H5C4N2;A0A7I0BM56;A0A0E1VG29	Q8CRN6	UDP-N-acetylglucosamine 1-carboxyvinyltransferase 1 OS=Staphylococcus epidermidis (strain ATCC 12228 / FDA PCI 1200) OX=176280 GN=murA1 PE=3 SV=1	3	714.079	0.20634	211.29	2.4723e-71	yes	0.864	1.086	1.059	1.07	0.946	0.975
3	AAAALILAGLVAEGTTQVTELK	22	Q8CRN6;Q5HMC2;D4FHJ6;A0A7I0AW49;A0A2G7HXX0;A0A7G9EC12;A0A7H5C4N2;A0A7I0BM56;A0A0E1VG29	Q8CRN6	UDP-N-acetylglucosamine 1-carboxyvinyltransferase 1 OS=Staphylococcus epidermidis (strain ATCC 12228 / FDA PCI 1200) OX=176280 GN=murA1 PE=3 SV=1	3	714.079	-0.059934	153.21	1.6021e-24	yes	0.81	1.114	1.162	0.978	0.893	1.044
4	AAAALILAGLVAEGTTQVTELK	22	Q8CRN6;Q5HMC2;D4FHJ6;A0A7I0AW49;A0A2G7HXX0;A0A7G9EC12;A0A7H5C4N2;A0A7I0BM56;A0A0E1VG29	Q8CRN6	UDP-N-acetylglucosamine 1-carboxyvinyltransferase 1 OS=Staphylococcus epidermidis (strain ATCC 12228 / FDA PCI 1200) OX=176280 GN=murA1 PE=3 SV=1	2	1070.61	0.028458	87.001	3.234e-06	yes	0.882	1.968	0.851	1.087	0.317	0.895
5	AAADLLGQPLYK	12	Q8CPY3;Q5HQV0;A0A7G9EF99;A0A4Q9W6H5;D4FNL3;A0A0E1VE67;Q5HHP1	Q8CPY3	Enolase OS=Staphylococcus epidermidis (strain ATCC 12228 / FDA PCI 1200) OX=176280 GN=eno PE=3 SV=1	2	630.845	-0.69694	190.86	4.9146e-18	no	1.075	0.904	0.861	0.986	1.063	1.112
6	AAADLLGQPLYK	12	Q8CPY3;Q5HQV0;A0A7G9EF99;A0A4Q9W6H5;D4FNL3;A0A0E1VE67;Q5HHP1	Q8CPY3	Enolase OS=Staphylococcus epidermidis (strain ATCC 12228 / FDA PCI 1200) OX=176280 GN=eno PE=3 SV=1	2	630.353	-0.45622	150.61	1.375e-08	no	0.928	1.05	1.042	1.062	0.884	1.033
7	AAADLLGQPLYK	12	Q8CPY3;Q5HQV0;A0A7G9EF99;A0A4Q9W6H5;D4FNL3;A0A0E1VE67;Q5HHP1	Q8CPY3	Enolase OS=Staphylococcus epidermidis (strain ATCC 12228 / FDA PCI 1200) OX=176280 GN=eno PE=3 SV=1	3	420.571	-3.461	72.652	0.0015363	no	1.028	0.881	0.863	0.996	1.106	1.127
8	AAADLLGQPLYK	12	Q8CPY3;Q5HQV0;A0A7G9EF99;A0A4Q9W6H5;D4FNL3;A0A0E1VE67;Q5HHP1	Q8CPY3	Enolase OS=Staphylococcus epidermidis (strain ATCC 12228 / FDA PCI 1200) OX=176280 GN=eno PE=3 SV=1	2	630.353	-3.3056	152.28	9.3997e-09	no	1.087	0.885	0.702	0.977	1.173	1.175
9	AAADLLGQPLYK	12	Q8CPY3;Q5HQV0;A0A7G9EF99;A0A4Q9W6H5;D4FNL3;A0A0E1VE67;Q5HHP1	Q8CPY3	Enolase OS=Staphylococcus epidermidis (strain ATCC 12228 / FDA PCI 1200) OX=176280 GN=eno PE=3 SV=1	3	420.571	-0.01868	72.652	0.0015363	no
10	AAADLLGQPLYK	12	Q8CPY3;Q5HQV0;A0A7G9EF99;A0A4Q9W6H5;D4FNL3;A0A0E1VE67;Q5HHP1	Q8CPY3	Enolase OS=Staphylococcus epidermidis (strain ATCC 12228 / FDA PCI 1200) OX=176280 GN=eno PE=3 SV=1	2	630.353	-0.35787	189.72	5.4587e-20	no	0.799	1.173	1.414	0.908	0.77	0.937
11	AAADLLGQPLYK	12	Q8CPY3;Q5HQV0;A0A7G9EF99;A0A4Q9W6H5;D4FNL3;A0A0E1VE67;Q5HHP1	Q8CPY3	Enolase OS=Staphylococcus epidermidis (strain ATCC 12228 / FDA PCI 1200) OX=176280 GN=eno PE=3 SV=1	2	630.353	-0.25025	103.55	0.00011553	no	0.72	1.22	1.568	0.871	0.718	0.903
12	AAAELNISTVAIYSNEDK	18	A0A509LUZ0;A0A0H2VFQ9;A0A7T9WRU0;A0A7G9EEG6;D4FJW7;A0A5R1C3A1;A0A7I0ATB1;A0A7I0AL28;A0A7H5C9N1;A0A0E1VFJ1;Q5HQ53	Q5HQ53	Pyruvate carboxylase OS=Staphylococcus epidermidis (strain ATCC 35984 / RP62A) OX=176279 GN=pyc PE=4 SV=1	3	636.99	-0.59716	32.981	0.042263	no
13	AAAELNISTVAIYSNEDK	18	A0A509LUZ0;A0A0H2VFQ9;A0A7T9WRU0;A0A7G9EEG6;D4FJW7;A0A5R1C3A1;A0A7I0ATB1;A0A7I0AL28;A0A7H5C9N1;A0A0E1VFJ1;Q5HQ53	Q5HQ53	Pyruvate carboxylase OS=Staphylococcus epidermidis (strain ATCC 35984 / RP62A) OX=176279 GN=pyc PE=4 SV=1	3	636.99	-0.53051	129.05	6.3345e-13	no
14	AAAELNISTVAIYSNEDK	18	A0A509LUZ0;A0A0H2VFQ9;A0A7T9WRU0;A0A7G9EEG6;D4FJW7;A0A5R1C3A1;A0A7I0ATB1;A0A7I0AL28;A0A7H5C9N1;A0A0E1VFJ1;Q5HQ53	Q5HQ53	Pyruvate carboxylase OS=Staphylococcus epidermidis (strain ATCC 35984 / RP62A) OX=176279 GN=pyc PE=4 SV=1	2	954.981	0.75622	226.93	1.1945e-62	no	1.014	0.989	0.84	1.165	0.962	1.031
15	AAAELNISTVAIYSNEDK	18	A0A509LUZ0;A0A0H2VFQ9;A0A7T9WRU0;A0A7G9EEG6;D4FJW7;A0A5R1C3A1;A0A7I0ATB1;A0A7I0AL28;A0A7H5C9N1;A0A0E1VFJ1;Q5HQ53	Q5HQ53	Pyruvate carboxylase OS=Staphylococcus epidermidis (strain ATCC 35984 / RP62A) OX=176279 GN=pyc PE=4 SV=1	3	636.99	-0.16473	105.06	6.9834e-07	no
16	AAAELNISTVAIYSNEDK	18	A0A509LUZ0;A0A0H2VFQ9;A0A7T9WRU0;A0A7G9EEG6;D4FJW7;A0A5R1C3A1;A0A7I0ATB1;A0A7I0AL28;A0A7H5C9N1;A0A0E1VFJ1;Q5HQ53	Q5HQ53	Pyruvate carboxylase OS=Staphylococcus epidermidis (strain ATCC 35984 / RP62A) OX=176279 GN=pyc PE=4 SV=1	3	636.99	-1.0528	86.005	4.7399e-05	no
17	AAAELNISTVAIYSNEDK	18	A0A509LUZ0;A0A0H2VFQ9;A0A7T9WRU0;A0A7G9EEG6;D4FJW7;A0A5R1C3A1;A0A7I0ATB1;A0A7I0AL28;A0A7H5C9N1;A0A0E1VFJ1;Q5HQ53	Q5HQ53	Pyruvate carboxylase OS=Staphylococcus epidermidis (strain ATCC 35984 / RP62A) OX=176279 GN=pyc PE=4 SV=1	3	636.99	-0.089339	30.863	0.04965	no
18	AAAENIIPNSTGAAK	15	Q8CPY5;Q5HQV4;D4FNK9;A0A2G7HZA0;A0A0E1VGE2;I3RTE8;A0A3G3IR45;D5LNH4;C3RYB9;A0A384ZLN4;A0A384ZLR1;A0A384ZLE7;I3RTB3;Q2LFB1;D5LT74;Q5HHP5;Q8L2R3	Q8CPY5	Glyceraldehyde-3-phosphate dehydrogenase 1 OS=Staphylococcus epidermidis (strain ATCC 12228 / FDA PCI 1200) OX=176280 GN=gapA1 PE=3 SV=1	2	714.87	-2.3214	137.16	1.2109e-11	no	0.978	1.074	1.041	0.956	0.964	0.987
19	AAAENIIPNSTGAAK	15	Q8CPY5;Q5HQV4;D4FNK9;A0A2G7HZA0;A0A0E1VGE2;I3RTE8;A0A3G3IR45;D5LNH4;C3RYB9;A0A384ZLN4;A0A384ZLR1;A0A384ZLE7;I3RTB3;Q2LFB1;D5LT74;Q5HHP5;Q8L2R3	Q8CPY5	Glyceraldehyde-3-phosphate dehydrogenase 1 OS=Staphylococcus epidermidis (strain ATCC 12228 / FDA PCI 1200) OX=176280 GN=gapA1 PE=3 SV=1	3	476.916	-2.3338	83.692	0.00026315	no
20	AAAENIIPNSTGAAK	15	Q8CPY5;Q5HQV4;D4FNK9;A0A2G7HZA0;A0A0E1VGE2;I3RTE8;A0A3G3IR45;D5LNH4;C3RYB9;A0A384ZLN4;A0A384ZLR1;A0A384ZLE7;I3RTB3;Q2LFB1;D5LT74;Q5HHP5;Q8L2R3	Q8CPY5	Glyceraldehyde-3-phosphate dehydrogenase 1 OS=Staphylococcus epidermidis (strain ATCC 12228 / FDA PCI 1200) OX=176280 GN=gapA1 PE=3 SV=1	4	357.939	-1.7367	42.52	0.02728	no	0.882	0.991	1.001	1.256	0.963	0.906
21	AAAENIIPNSTGAAK	15	Q8CPY5;Q5HQV4;D4FNK9;A0A2G7HZA0;A0A0E1VGE2;I3RTE8;A0A3G3IR45;D5LNH4;C3RYB9;A0A384ZLN4;A0A384ZLR1;A0A384ZLE7;I3RTB3;Q2LFB1;D5LT74;Q5HHP5;Q8L2R3	Q8CPY5	Glyceraldehyde-3-phosphate dehydrogenase 1 OS=Staphylococcus epidermidis (strain ATCC 12228 / FDA PCI 1200) OX=176280 GN=gapA1 PE=3 SV=1	2	714.87	0.055319	158.4	4.9016e-19	no	0.927	1.154	1.022	1.003	0.909	0.986
22	AAAENIIPNSTGAAK	15	Q8CPY5;Q5HQV4;D4FNK9;A0A2G7HZA0;A0A0E1VGE2;I3RTE8;A0A3G3IR45;D5LNH4;C3RYB9;A0A384ZLN4;A0A384ZLR1;A0A384ZLE7;I3RTB3;Q2LFB1;D5LT74;Q5HHP5;Q8L2R3	Q8CPY5	Glyceraldehyde-3-phosphate dehydrogenase 1 OS=Staphylococcus epidermidis (strain ATCC 12228 / FDA PCI 1200) OX=176280 GN=gapA1 PE=3 SV=1	3	476.916	-0.040913	91.441	0.00011856	no	0.825	1.087	0.978	1.131	0.895	1.085
23	AAAENIIPNSTGAAK	15	Q8CPY5;Q5HQV4;D4FNK9;A0A2G7HZA0;A0A0E1VGE2;I3RTE8;A0A3G3IR45;D5LNH4;C3RYB9;A0A384ZLN4;A0A384ZLR1;A0A384ZLE7;I3RTB3;Q2LFB1;D5LT74;Q5HHP5;Q8L2R3	Q8CPY5	Glyceraldehyde-3-phosphate dehydrogenase 1 OS=Staphylococcus epidermidis (strain ATCC 12228 / FDA PCI 1200) OX=176280 GN=gapA1 PE=3 SV=1	3	476.916	-1.5193	78.505	0.00038185	no
24	AAAENIIPNSTGAAK	15	Q8CPY5;Q5HQV4;D4FNK9;A0A2G7HZA0;A0A0E1VGE2;I3RTE8;A0A3G3IR45;D5LNH4;C3RYB9;A0A384ZLN4;A0A384ZLR1;A0A384ZLE7;I3RTB3;Q2LFB1;D5LT74;Q5HHP5;Q8L2R3	Q8CPY5	Glyceraldehyde-3-phosphate dehydrogenase 1 OS=Staphylococcus epidermidis (strain ATCC 12228 / FDA PCI 1200) OX=176280 GN=gapA1 PE=3 SV=1	3	476.916	1.207	78.505	0.00038185	no
25	AAAENIIPNSTGAAK	15	Q8CPY5;Q5HQV4;D4FNK9;A0A2G7HZA0;A0A0E1VGE2;I3RTE8;A0A3G3IR45;D5LNH4;C3RYB9;A0A384ZLN4;A0A384ZLR1;A0A384ZLE7;I3RTB3;Q2LFB1;D5LT74;Q5HHP5;Q8L2R3	Q8CPY5	Glyceraldehyde-3-phosphate dehydrogenase 1 OS=Staphylococcus epidermidis (strain ATCC 12228 / FDA PCI 1200) OX=176280 GN=gapA1 PE=3 SV=1	2	714.87	1.4941	121.08	1.775e-07	no	0.944	1.106	1.061	1.016	0.803	1.069
26	AAAENIIPNSTGAAK	15	Q8CPY5;Q5HQV4;D4FNK9;A0A2G7HZA0;A0A0E1VGE2;I3RTE8;A0A3G3IR45;D5LNH4;C3RYB9;A0A384ZLN4;A0A384ZLR1;A0A384ZLE7;I3RTB3;Q2LFB1;D5LT74;Q5HHP5;Q8L2R3	Q8CPY5	Glyceraldehyde-3-phosphate dehydrogenase 1 OS=Staphylococcus epidermidis (strain ATCC 12228 / FDA PCI 1200) OX=176280 GN=gapA1 PE=3 SV=1	2	714.87	-0.95566	138.24	9.6513e-12	no	0.931	1.158	1.004	1.041	0.916	0.95
27	AAAENIIPNSTGAAK	15	Q8CPY5;Q5HQV4;D4FNK9;A0A2G7HZA0;A0A0E1VGE2;I3RTE8;A0A3G3IR45;D5LNH4;C3RYB9;A0A384ZLN4;A0A384ZLR1;A0A384ZLE7;I3RTB3;Q2LFB1;D5LT74;Q5HHP5;Q8L2R3	Q8CPY5	Glyceraldehyde-3-phosphate dehydrogenase 1 OS=Staphylococcus epidermidis (strain ATCC 12228 / FDA PCI 1200) OX=176280 GN=gapA1 PE=3 SV=1	3	476.916	-1.1406	83.692	0.00026315	no	1.074	1.124	1.001	1.104	0.842	0.856
28	AAAENIIPNSTGAAK	15	Q8CPY5;Q5HQV4;D4FNK9;A0A2G7HZA0;A0A0E1VGE2;I3RTE8;A0A3G3IR45;D5LNH4;C3RYB9;A0A384ZLN4;A0A384ZLR1;A0A384ZLE7;I3RTB3;Q2LFB1;D5LT74;Q5HHP5;Q8L2R3	Q8CPY5	Glyceraldehyde-3-phosphate dehydrogenase 1 OS=Staphylococcus epidermidis (strain ATCC 12228 / FDA PCI 1200) OX=176280 GN=gapA1 PE=3 SV=1	2	714.87	-0.22695	119.39	2.1503e-07	no	0.901	1.097	1.14	1.011	0.87	0.982
29	AAAENIIPNSTGAAK	15	Q8CPY5;Q5HQV4;D4FNK9;A0A2G7HZA0;A0A0E1VGE2;I3RTE8;A0A3G3IR45;D5LNH4;C3RYB9;A0A384ZLN4;A0A384ZLR1;A0A384ZLE7;I3RTB3;Q2LFB1;D5LT74;Q5HHP5;Q8L2R3	Q8CPY5	Glyceraldehyde-3-phosphate dehydrogenase 1 OS=Staphylococcus epidermidis (strain ATCC 12228 / FDA PCI 1200) OX=176280 GN=gapA1 PE=3 SV=1	2	714.87	-25.971	84.658	0.0023472	no	0.877	1.018	1.003	1.105	0.971	1.028
30	AAAENIIPNSTGAAK	15	Q8CPY5;Q5HQV4;D4FNK9;A0A2G7HZA0;A0A0E1VGE2;I3RTE8;A0A3G3IR45;D5LNH4;C3RYB9;A0A384ZLN4;A0A384ZLR1;A0A384ZLE7;I3RTB3;Q2LFB1;D5LT74;Q5HHP5;Q8L2R3	Q8CPY5	Glyceraldehyde-3-phosphate dehydrogenase 1 OS=Staphylococcus epidermidis (strain ATCC 12228 / FDA PCI 1200) OX=176280 GN=gapA1 PE=3 SV=1	3	476.916	-26.102	63.037	0.0021418	no
31	AAAENIIPNSTGAAK	15	Q8CPY5;Q5HQV4;D4FNK9;A0A2G7HZA0;A0A0E1VGE2;I3RTE8;A0A3G3IR45;D5LNH4;C3RYB9;A0A384ZLN4;A0A384ZLR1;A0A384ZLE7;I3RTB3;Q2LFB1;D5LT74;Q5HHP5;Q8L2R3	Q8CPY5	Glyceraldehyde-3-phosphate dehydrogenase 1 OS=Staphylococcus epidermidis (strain ATCC 12228 / FDA PCI 1200) OX=176280 GN=gapA1 PE=3 SV=1	2	714.87	1.0797	67.456	0.015002	no
32	AAAENIIPNSTGAAK	15	Q8CPY5;Q5HQV4;D4FNK9;A0A2G7HZA0;A0A0E1VGE2;I3RTE8;A0A3G3IR45;D5LNH4;C3RYB9;A0A384ZLN4;A0A384ZLR1;A0A384ZLE7;I3RTB3;Q2LFB1;D5LT74;Q5HHP5;Q8L2R3	Q8CPY5	Glyceraldehyde-3-phosphate dehydrogenase 1 OS=Staphylococcus epidermidis (strain ATCC 12228 / FDA PCI 1200) OX=176280 GN=gapA1 PE=3 SV=1	2	714.87	-0.046655	176.51	8.1503e-24	no	0.958	1.018	1.079	1.031	0.875	1.039
33	AAAENIIPNSTGAAK	15	Q8CPY5;Q5HQV4;D4FNK9;A0A2G7HZA0;A0A0E1VGE2;I3RTE8;A0A3G3IR45;D5LNH4;C3RYB9;A0A384ZLN4;A0A384ZLR1;A0A384ZLE7;I3RTB3;Q2LFB1;D5LT74;Q5HHP5;Q8L2R3	Q8CPY5	Glyceraldehyde-3-phosphate dehydrogenase 1 OS=Staphylococcus epidermidis (strain ATCC 12228 / FDA PCI 1200) OX=176280 GN=gapA1 PE=3 SV=1	3	476.916	-0.28468	92.939	0.00010331	no	1.019	1.073	1.02	1.013	0.884	0.991
34	AAAENIIPNSTGAAK	15	Q8CPY5;Q5HQV4;D4FNK9;A0A2G7HZA0;A0A0E1VGE2;I3RTE8;A0A3G3IR45;D5LNH4;C3RYB9;A0A384ZLN4;A0A384ZLR1;A0A384ZLE7;I3RTB3;Q2LFB1;D5LT74;Q5HHP5;Q8L2R3	Q8CPY5	Glyceraldehyde-3-phosphate dehydrogenase 1 OS=Staphylococcus epidermidis (strain ATCC 12228 / FDA PCI 1200) OX=176280 GN=gapA1 PE=3 SV=1	4	357.939	0.44273	74.789	0.00043452	no	0.975	1.239	1.111	1.022	0.743	0.911
35	AAAENIIPNSTGAAK	15	Q8CPY5;Q5HQV4;D4FNK9;A0A2G7HZA0;A0A0E1VGE2;I3RTE8;A0A3G3IR45;D5LNH4;C3RYB9;A0A384ZLN4;A0A384ZLR1;A0A384ZLE7;I3RTB3;Q2LFB1;D5LT74;Q5HHP5;Q8L2R3	Q8CPY5	Glyceraldehyde-3-phosphate dehydrogenase 1 OS=Staphylococcus epidermidis (strain ATCC 12228 / FDA PCI 1200) OX=176280 GN=gapA1 PE=3 SV=1	2	714.87	-0.71536	89.403	0.0013565	no	0.836	1.072	1.171	1.193	0.816	0.912
36	AAAENIIPNSTGAAK	15	Q8CPY5;Q5HQV4;D4FNK9;A0A2G7HZA0;A0A0E1VGE2;I3RTE8;A0A3G3IR45;D5LNH4;C3RYB9;A0A384ZLN4;A0A384ZLR1;A0A384ZLE7;I3RTB3;Q2LFB1;D5LT74;Q5HHP5;Q8L2R3	Q8CPY5	Glyceraldehyde-3-phosphate dehydrogenase 1 OS=Staphylococcus epidermidis (strain ATCC 12228 / FDA PCI 1200) OX=176280 GN=gapA1 PE=3 SV=1	2	714.87	-0.15527	90.685	0.0012295	no	0.847	1.136	1.131	1.128	0.843	0.915
37	AAAENIIPNSTGAAK	15	Q8CPY5;Q5HQV4;D4FNK9;A0A2G7HZA0;A0A0E1VGE2;I3RTE8;A0A3G3IR45;D5LNH4;C3RYB9;A0A384ZLN4;A0A384ZLR1;A0A384ZLE7;I3RTB3;Q2LFB1;D5LT74;Q5HHP5;Q8L2R3	Q8CPY5	Glyceraldehyde-3-phosphate dehydrogenase 1 OS=Staphylococcus epidermidis (strain ATCC 12228 / FDA PCI 1200) OX=176280 GN=gapA1 PE=3 SV=1	3	476.916	-0.54999	82.102	0.00029954	no
38	AAAENIIPNSTGAAK	15	Q8CPY5;Q5HQV4;D4FNK9;A0A2G7HZA0;A0A0E1VGE2;I3RTE8;A0A3G3IR45;D5LNH4;C3RYB9;A0A384ZLN4;A0A384ZLR1;A0A384ZLE7;I3RTB3;Q2LFB1;D5LT74;Q5HHP5;Q8L2R3	Q8CPY5	Glyceraldehyde-3-phosphate dehydrogenase 1 OS=Staphylococcus epidermidis (strain ATCC 12228 / FDA PCI 1200) OX=176280 GN=gapA1 PE=3 SV=1	3	476.916	-0.45358	63.894	0.0020253	no
39	AAAENIIPNSTGAAK	15	Q8CPY5;Q5HQV4;D4FNK9;A0A2G7HZA0;A0A0E1VGE2;I3RTE8;A0A3G3IR45;D5LNH4;C3RYB9;A0A384ZLN4;A0A384ZLR1;A0A384ZLE7;I3RTB3;Q2LFB1;D5LT74;Q5HHP5;Q8L2R3	Q8CPY5	Glyceraldehyde-3-phosphate dehydrogenase 1 OS=Staphylococcus epidermidis (strain ATCC 12228 / FDA PCI 1200) OX=176280 GN=gapA1 PE=3 SV=1	3	476.588	-0.028775	58.831	0.0037919	no	0.834	1.086	1.133	1.097	0.944	0.905
40	AAAENIIPNSTGAAK	15	Q8CPY5;Q5HQV4;D4FNK9;A0A2G7HZA0;A0A0E1VGE2;I3RTE8;A0A3G3IR45;D5LNH4;C3RYB9;A0A384ZLN4;A0A384ZLR1;A0A384ZLE7;I3RTB3;Q2LFB1;D5LT74;Q5HHP5;Q8L2R3	Q8CPY5	Glyceraldehyde-3-phosphate dehydrogenase 1 OS=Staphylococcus epidermidis (strain ATCC 12228 / FDA PCI 1200) OX=176280 GN=gapA1 PE=3 SV=1	2	714.378	-25.574	47.559	0.053037	no	0.765	1.249	1.163	1.095	0.859	0.869
41	AAAENIIPNSTGAAK	15	Q8CPY5;Q5HQV4;D4FNK9;A0A2G7HZA0;A0A0E1VGE2;I3RTE8;A0A3G3IR45;D5LNH4;C3RYB9;A0A384ZLN4;A0A384ZLR1;A0A384ZLE7;I3RTB3;Q2LFB1;D5LT74;Q5HHP5;Q8L2R3	Q8CPY5	Glyceraldehyde-3-phosphate dehydrogenase 1 OS=Staphylococcus epidermidis (strain ATCC 12228 / FDA PCI 1200) OX=176280 GN=gapA1 PE=3 SV=1	3	476.588	0.024894	74.789	0.00043251	no	0.723	1.274	1.454	0.963	0.74	0.846
42	AAAENIIPNSTGAAK	15	Q8CPY5;Q5HQV4;D4FNK9;A0A2G7HZA0;A0A0E1VGE2;I3RTE8;A0A3G3IR45;D5LNH4;C3RYB9;A0A384ZLN4;A0A384ZLR1;A0A384ZLE7;I3RTB3;Q2LFB1;D5LT74;Q5HHP5;Q8L2R3	Q8CPY5	Glyceraldehyde-3-phosphate dehydrogenase 1 OS=Staphylococcus epidermidis (strain ATCC 12228 / FDA PCI 1200) OX=176280 GN=gapA1 PE=3 SV=1	3	476.588	-1.3425	63.128	0.0016963	no
43	AAAENIIPNSTGAAK	15	Q8CPY5;Q5HQV4;D4FNK9;A0A2G7HZA0;A0A0E1VGE2;I3RTE8;A0A3G3IR45;D5LNH4;C3RYB9;A0A384ZLN4;A0A384ZLR1;A0A384ZLE7;I3RTB3;Q2LFB1;D5LT74;Q5HHP5;Q8L2R3	Q8CPY5	Glyceraldehyde-3-phosphate dehydrogenase 1 OS=Staphylococcus epidermidis (strain ATCC 12228 / FDA PCI 1200) OX=176280 GN=gapA1 PE=3 SV=1	2	714.378	-0.81373	119.39	7.1229e-08	no	0.598	1.31	1.691	0.973	0.629	0.8
44	AAAENIIPNSTGAAK	15	Q8CPY5;Q5HQV4;D4FNK9;A0A2G7HZA0;A0A0E1VGE2;I3RTE8;A0A3G3IR45;D5LNH4;C3RYB9;A0A384ZLN4;A0A384ZLR1;A0A384ZLE7;I3RTB3;Q2LFB1;D5LT74;Q5HHP5;Q8L2R3	Q8CPY5	Glyceraldehyde-3-phosphate dehydrogenase 1 OS=Staphylococcus epidermidis (strain ATCC 12228 / FDA PCI 1200) OX=176280 GN=gapA1 PE=3 SV=1	2	714.378	1.3928	100.55	8.3252e-05	no	0.977	1.048	1.079	1.054	0.924	0.917
45	AAAENIIPNSTGAAK	15	Q8CPY5;Q5HQV4;D4FNK9;A0A2G7HZA0;A0A0E1VGE2;I3RTE8;A0A3G3IR45;D5LNH4;C3RYB9;A0A384ZLN4;A0A384ZLR1;A0A384ZLE7;I3RTB3;Q2LFB1;D5LT74;Q5HHP5;Q8L2R3	Q8CPY5	Glyceraldehyde-3-phosphate dehydrogenase 1 OS=Staphylococcus epidermidis (strain ATCC 12228 / FDA PCI 1200) OX=176280 GN=gapA1 PE=3 SV=1	3	476.588	-0.029871	102.52	6.5675e-06	no	0.933	1.074	0.991	0.995	0.997	1.01
46	AAAENIIPNSTGAAK	15	Q8CPY5;Q5HQV4;D4FNK9;A0A2G7HZA0;A0A0E1VGE2;I3RTE8;A0A3G3IR45;D5LNH4;C3RYB9;A0A384ZLN4;A0A384ZLR1;A0A384ZLE7;I3RTB3;Q2LFB1;D5LT74;Q5HHP5;Q8L2R3	Q8CPY5	Glyceraldehyde-3-phosphate dehydrogenase 1 OS=Staphylococcus epidermidis (strain ATCC 12228 / FDA PCI 1200) OX=176280 GN=gapA1 PE=3 SV=1	4	357.693	0.83027	48.823	0.0088029	no		1.121	0.858	1.468		0.553
47	AAAENIIPNSTGAAK	15	Q8CPY5;Q5HQV4;D4FNK9;A0A2G7HZA0;A0A0E1VGE2;I3RTE8;A0A3G3IR45;D5LNH4;C3RYB9;A0A384ZLN4;A0A384ZLR1;A0A384ZLE7;I3RTB3;Q2LFB1;D5LT74;Q5HHP5;Q8L2R3	Q8CPY5	Glyceraldehyde-3-phosphate dehydrogenase 1 OS=Staphylococcus epidermidis (strain ATCC 12228 / FDA PCI 1200) OX=176280 GN=gapA1 PE=3 SV=1	2	714.378	0.22187	193.23	1.0176e-30	no	0.961	1.03	0.973	1.038	0.891	1.106
48	AAAENIIPNSTGAAK	15	Q8CPY5;Q5HQV4;D4FNK9;A0A2G7HZA0;A0A0E1VGE2;I3RTE8;A0A3G3IR45;D5LNH4;C3RYB9;A0A384ZLN4;A0A384ZLR1;A0A384ZLE7;I3RTB3;Q2LFB1;D5LT74;Q5HHP5;Q8L2R3	Q8CPY5	Glyceraldehyde-3-phosphate dehydrogenase 1 OS=Staphylococcus epidermidis (strain ATCC 12228 / FDA PCI 1200) OX=176280 GN=gapA1 PE=3 SV=1	4	357.693	1.9488	72.175	0.0006347	no	0.886	1.061	0.979	0.916	1.025	1.133
49	AAAENIIPNSTGAAK	15	Q8CPY5;Q5HQV4;D4FNK9;A0A2G7HZA0;A0A0E1VGE2;I3RTE8;A0A3G3IR45;D5LNH4;C3RYB9;A0A384ZLN4;A0A384ZLR1;A0A384ZLE7;I3RTB3;Q2LFB1;D5LT74;Q5HHP5;Q8L2R3	Q8CPY5	Glyceraldehyde-3-phosphate dehydrogenase 1 OS=Staphylococcus epidermidis (strain ATCC 12228 / FDA PCI 1200) OX=176280 GN=gapA1 PE=3 SV=1	2	714.378	0.95316	178.58	1.7914e-24	no	0.894	1.093	1.029	1.079	0.933	0.972
50	AAAENIIPNSTGAAK	15	Q8CPY5;Q5HQV4;D4FNK9;A0A2G7HZA0;A0A0E1VGE2;I3RTE8;A0A3G3IR45;D5LNH4;C3RYB9;A0A384ZLN4;A0A384ZLR1;A0A384ZLE7;I3RTB3;Q2LFB1;D5LT74;Q5HHP5;Q8L2R3	Q8CPY5	Glyceraldehyde-3-phosphate dehydrogenase 1 OS=Staphylococcus epidermidis (strain ATCC 12228 / FDA PCI 1200) OX=176280 GN=gapA1 PE=3 SV=1	3	476.588	0.60618	91.441	9.4448e-05	no	0.88	1.102	1.149	1.116	0.748	1.006
51	AAAENIIPNSTGAAK	15	Q8CPY5;Q5HQV4;D4FNK9;A0A2G7HZA0;A0A0E1VGE2;I3RTE8;A0A3G3IR45;D5LNH4;C3RYB9;A0A384ZLN4;A0A384ZLR1;A0A384ZLE7;I3RTB3;Q2LFB1;D5LT74;Q5HHP5;Q8L2R3	Q8CPY5	Glyceraldehyde-3-phosphate dehydrogenase 1 OS=Staphylococcus epidermidis (strain ATCC 12228 / FDA PCI 1200) OX=176280 GN=gapA1 PE=3 SV=1	4	357.693	1.2102	46.964	0.013084	no	0.553	1.649	1.216	0.787	0.972	0.824
52	AAAENIIPNSTGAAK	15	Q8CPY5;Q5HQV4;D4FNK9;A0A2G7HZA0;A0A0E1VGE2;I3RTE8;A0A3G3IR45;D5LNH4;C3RYB9;A0A384ZLN4;A0A384ZLR1;A0A384ZLE7;I3RTB3;Q2LFB1;D5LT74;Q5HHP5;Q8L2R3	Q8CPY5	Glyceraldehyde-3-phosphate dehydrogenase 1 OS=Staphylococcus epidermidis (strain ATCC 12228 / FDA PCI 1200) OX=176280 GN=gapA1 PE=3 SV=1	2	714.378	-0.19256	116.01	9.6063e-08	no	0.761	1.187	1.209	1.097	0.758	0.988
53	AAAENIIPNSTGAAK	15	Q8CPY5;Q5HQV4;D4FNK9;A0A2G7HZA0;A0A0E1VGE2;I3RTE8;A0A3G3IR45;D5LNH4;C3RYB9;A0A384ZLN4;A0A384ZLR1;A0A384ZLE7;I3RTB3;Q2LFB1;D5LT74;Q5HHP5;Q8L2R3	Q8CPY5	Glyceraldehyde-3-phosphate dehydrogenase 1 OS=Staphylococcus epidermidis (strain ATCC 12228 / FDA PCI 1200) OX=176280 GN=gapA1 PE=3 SV=1	3	476.588	-1.3436	62.357	0.0017798	no	0.699	1.134	1.36	1.155	0.802	0.85
54	AAAENIIPNSTGAAK	15	Q8CPY5;Q5HQV4;D4FNK9;A0A2G7HZA0;A0A0E1VGE2;I3RTE8;A0A3G3IR45;D5LNH4;C3RYB9;A0A384ZLN4;A0A384ZLR1;A0A384ZLE7;I3RTB3;Q2LFB1;D5LT74;Q5HHP5;Q8L2R3	Q8CPY5	Glyceraldehyde-3-phosphate dehydrogenase 1 OS=Staphylococcus epidermidis (strain ATCC 12228 / FDA PCI 1200) OX=176280 GN=gapA1 PE=3 SV=1	2	714.378	-0.88153	103.91	2.3794e-05	no	0.225	1.19	1.837	1.483	0.599	0.666
55	AAAENIIPNSTGAAK	15	Q8CPY5;Q5HQV4;D4FNK9;A0A2G7HZA0;A0A0E1VGE2;I3RTE8;A0A3G3IR45;D5LNH4;C3RYB9;A0A384ZLN4;A0A384ZLR1;A0A384ZLE7;I3RTB3;Q2LFB1;D5LT74;Q5HHP5;Q8L2R3	Q8CPY5	Glyceraldehyde-3-phosphate dehydrogenase 1 OS=Staphylococcus epidermidis (strain ATCC 12228 / FDA PCI 1200) OX=176280 GN=gapA1 PE=3 SV=1	2	715.362	0.05123	158.04	6.8675e-19	no	0.97	1.073	0.946	1.062	0.957	0.992
56	AAAENIIPNSTGAAK	15	Q8CPY5;Q5HQV4;D4FNK9;A0A2G7HZA0;A0A0E1VGE2;I3RTE8;A0A3G3IR45;D5LNH4;C3RYB9;A0A384ZLN4;A0A384ZLR1;A0A384ZLE7;I3RTB3;Q2LFB1;D5LT74;Q5HHP5;Q8L2R3	Q8CPY5	Glyceraldehyde-3-phosphate dehydrogenase 1 OS=Staphylococcus epidermidis (strain ATCC 12228 / FDA PCI 1200) OX=176280 GN=gapA1 PE=3 SV=1	3	477.244	0.073565	62.357	0.0032648	no
57	AAAENIIPNSTGAAK	15	Q8CPY5;Q5HQV4;D4FNK9;A0A2G7HZA0;A0A0E1VGE2;I3RTE8;A0A3G3IR45;D5LNH4;C3RYB9;A0A384ZLN4;A0A384ZLR1;A0A384ZLE7;I3RTB3;Q2LFB1;D5LT74;Q5HHP5;Q8L2R3	Q8CPY5	Glyceraldehyde-3-phosphate dehydrogenase 1 OS=Staphylococcus epidermidis (strain ATCC 12228 / FDA PCI 1200) OX=176280 GN=gapA1 PE=3 SV=1	3	477.244	-0.16946	82.102	0.00043769	no
58	AAAENIIPNSTGAAK	15	Q8CPY5;Q5HQV4;D4FNK9;A0A2G7HZA0;A0A0E1VGE2;I3RTE8;A0A3G3IR45;D5LNH4;C3RYB9;A0A384ZLN4;A0A384ZLR1;A0A384ZLE7;I3RTB3;Q2LFB1;D5LT74;Q5HHP5;Q8L2R3	Q8CPY5	Glyceraldehyde-3-phosphate dehydrogenase 1 OS=Staphylococcus epidermidis (strain ATCC 12228 / FDA PCI 1200) OX=176280 GN=gapA1 PE=3 SV=1	2	715.362	0.012823	116.54	3.7747e-07	no	0.916	1.083	1.078	1.121	0.896	0.906
59	AAAENIIPNSTGAAK	15	Q8CPY5;Q5HQV4;D4FNK9;A0A2G7HZA0;A0A0E1VGE2;I3RTE8;A0A3G3IR45;D5LNH4;C3RYB9;A0A384ZLN4;A0A384ZLR1;A0A384ZLE7;I3RTB3;Q2LFB1;D5LT74;Q5HHP5;Q8L2R3	Q8CPY5	Glyceraldehyde-3-phosphate dehydrogenase 1 OS=Staphylococcus epidermidis (strain ATCC 12228 / FDA PCI 1200) OX=176280 GN=gapA1 PE=3 SV=1	3	477.244	-1.6318	99.481	5.3672e-05	no
60	AAAENIIPNSTGAAK	15	Q8CPY5;Q5HQV4;D4FNK9;A0A2G7HZA0;A0A0E1VGE2;I3RTE8;A0A3G3IR45;D5LNH4;C3RYB9;A0A384ZLN4;A0A384ZLR1;A0A384ZLE7;I3RTB3;Q2LFB1;D5LT74;Q5HHP5;Q8L2R3	Q8CPY5	Glyceraldehyde-3-phosphate dehydrogenase 1 OS=Staphylococcus epidermidis (strain ATCC 12228 / FDA PCI 1200) OX=176280 GN=gapA1 PE=3 SV=1	2	715.362	-1.1933	128.28	2.3645e-08	no	0.876	1.011	1.151	1.122	0.885	0.955
61	AAAENIIPNSTGAAKAIGK	19	Q8CPY5;Q5HQV4;D4FNK9;A0A2G7HZA0;A0A0E1VGE2;I3RTE8;A0A3G3IR45;D5LNH4;C3RYB9;A0A384ZLN4;A0A384ZLR1;A0A384ZLE7;I3RTB3;Q2LFB1;D5LT74;Q5HHP5;Q8L2R3	Q8CPY5	Glyceraldehyde-3-phosphate dehydrogenase 1 OS=Staphylococcus epidermidis (strain ATCC 12228 / FDA PCI 1200) OX=176280 GN=gapA1 PE=3 SV=1	3	599.667	-0.55466	103.66	4.6437e-07	no	0.996	1.081	1.032	0.968	0.883	1.04
62	AAAGGDEAAIFAGDLMR	17	Q8CNI7;Q5HMA4;D4FHL4;A0A2G7HWL7;A0A7H5C4S5;A0A5R1C7S3;A0A7I0AM07;A0A0E1VI71;Q5HE82	Q8CNI7	Peptide chain release factor 1 OS=Staphylococcus epidermidis (strain ATCC 12228 / FDA PCI 1200) OX=176280 GN=prfA PE=3 SV=1	2	826.391	-0.72902	88.187	0.0001587	yes	0.822	1.097	1.086	1.073	0.876	1.046
63	AAAGGDEAAIFAGDLMR	17	Q8CNI7;Q5HMA4;D4FHL4;A0A2G7HWL7;A0A7H5C4S5;A0A5R1C7S3;A0A7I0AM07;A0A0E1VI71;Q5HE82	Q8CNI7	Peptide chain release factor 1 OS=Staphylococcus epidermidis (strain ATCC 12228 / FDA PCI 1200) OX=176280 GN=prfA PE=3 SV=1	3	551.263	-1.174	75.911	0.00013806	yes	0.638	1.15	1.004	1.305	0.848	1.053
64	AAAGGDEAAIFAGDLMR	17	Q8CNI7;Q5HMA4;D4FHL4;A0A2G7HWL7;A0A7H5C4S5;A0A5R1C7S3;A0A7I0AM07;A0A0E1VI71;Q5HE82	Q8CNI7	Peptide chain release factor 1 OS=Staphylococcus epidermidis (strain ATCC 12228 / FDA PCI 1200) OX=176280 GN=prfA PE=3 SV=1	2	826.391	-1.0445	75.045	0.00041669	yes	0.824	1.154	1.114	1.033	0.839	1.037
65	AAAGGDEAAIFAGDLMR	17	Q8CNI7;Q5HMA4;D4FHL4;A0A2G7HWL7;A0A7H5C4S5;A0A5R1C7S3;A0A7I0AM07;A0A0E1VI71;Q5HE82	Q8CNI7	Peptide chain release factor 1 OS=Staphylococcus epidermidis (strain ATCC 12228 / FDA PCI 1200) OX=176280 GN=prfA PE=3 SV=1	2	818.393	-3.0041	165.51	2.0119e-26	yes	0.863	1.055	1.097	1.009	0.92	1.057
66	AAAGGDEAAIFAGDLMR	17	Q8CNI7;Q5HMA4;D4FHL4;A0A2G7HWL7;A0A7H5C4S5;A0A5R1C7S3;A0A7I0AM07;A0A0E1VI71;Q5HE82	Q8CNI7	Peptide chain release factor 1 OS=Staphylococcus epidermidis (strain ATCC 12228 / FDA PCI 1200) OX=176280 GN=prfA PE=3 SV=1	3	545.931	-2.9737	91.657	5.1163e-05	yes
67	AAAGGYGAHMDIMK	14	Q8CNF7;Q5HM40;D4FP92;A0A7I0A6G7;A0A2G7HX51;A0A7I0BKZ7;A0A0E1V9G8;Q5HE15	Q8CNF7	PTS system lactose-specific EIICB component OS=Staphylococcus epidermidis (strain ATCC 12228 / FDA PCI 1200) OX=176280 GN=lacE PE=3 SV=1	3	464.885	-0.51327	116.54	3.8186e-08	yes	1.181	0.903	0.857	0.879	1.027	1.153
68	AAAGGYGAHMDIMK	14	Q8CNF7;Q5HM40;D4FP92;A0A7I0A6G7;A0A2G7HX51;A0A7I0BKZ7;A0A0E1V9G8;Q5HE15	Q8CNF7	PTS system lactose-specific EIICB component OS=Staphylococcus epidermidis (strain ATCC 12228 / FDA PCI 1200) OX=176280 GN=lacE PE=3 SV=1	3	470.216	1.0198	64.121	0.0019401	yes
69	AAAGGYGAHMDIMK	14	Q8CNF7;Q5HM40;D4FP92;A0A7I0A6G7;A0A2G7HX51;A0A7I0BKZ7;A0A0E1V9G8;Q5HE15	Q8CNF7	PTS system lactose-specific EIICB component OS=Staphylococcus epidermidis (strain ATCC 12228 / FDA PCI 1200) OX=176280 GN=lacE PE=3 SV=1	3	470.216	1.7812	84.169	0.00023406	yes
70	AAAIAYAK	8	Q5HMW1;A0A7I0ARL7;A0A2T4LKM4;A0A0H2VJX0;D4FN94;A0A0E1VHR2;A0A7I0BLX8;A0A7H5C5H9;A0A0H2WXS4;A0A7I0A670	Q5HMW1	Uncharacterized protein OS=Staphylococcus epidermidis (strain ATCC 35984 / RP62A) OX=176279 GN=SERP1517 PE=4 SV=1	2	389.727	-5.8422	146.21	0.00046366	no	1.228	0.877	0.787	0.953	1.036	1.119
71	AAAIAYAK	8	Q5HMW1;A0A7I0ARL7;A0A2T4LKM4;A0A0H2VJX0;D4FN94;A0A0E1VHR2;A0A7I0BLX8;A0A7H5C5H9;A0A0H2WXS4;A0A7I0A670	Q5HMW1	Uncharacterized protein OS=Staphylococcus epidermidis (strain ATCC 35984 / RP62A) OX=176279 GN=SERP1517 PE=4 SV=1	2	389.727	-0.94345	129.96	0.0023043	no	0.865	1.061	1.183	0.955	0.935	1.002
72	AAAIAYAK	8	Q5HMW1;A0A7I0ARL7;A0A2T4LKM4;A0A0H2VJX0;D4FN94;A0A0E1VHR2;A0A7I0BLX8;A0A7H5C5H9;A0A0H2WXS4;A0A7I0A670	Q5HMW1	Uncharacterized protein OS=Staphylococcus epidermidis (strain ATCC 35984 / RP62A) OX=176279 GN=SERP1517 PE=4 SV=1	3	260.153	-0.95909	38.133	0.053562	no
73	AAALNGWIDEEK	12	Q8CNZ0;Q5HNN5;D4FIF6;A0A509LSI6;A0A2T4LIG3;A0A7H5C892;A0A7I0ANN0;A0A0E1VBN1	Q8CNZ0	Delta-aminolevulinic acid dehydratase OS=Staphylococcus epidermidis (strain ATCC 12228 / FDA PCI 1200) OX=176280 GN=hemB PE=3 SV=1	2	659.32	-0.093528	85.533	0.004608	yes	0.89	0.963	1.073	1.163	0.967	0.944
74	AAALNGWIDEEK	12	Q8CNZ0;Q5HNN5;D4FIF6;A0A509LSI6;A0A2T4LIG3;A0A7H5C892;A0A7I0ANN0;A0A0E1VBN1	Q8CNZ0	Delta-aminolevulinic acid dehydratase OS=Staphylococcus epidermidis (strain ATCC 12228 / FDA PCI 1200) OX=176280 GN=hemB PE=3 SV=1	3	439.882	-0.62544	85.813	0.00045581	yes	0.807	1.159	1.068	1.088	0.869	1.009
75	AAALNGWIDEEK	12	Q8CNZ0;Q5HNN5;D4FIF6;A0A509LSI6;A0A2T4LIG3;A0A7H5C892;A0A7I0ANN0;A0A0E1VBN1	Q8CNZ0	Delta-aminolevulinic acid dehydratase OS=Staphylococcus epidermidis (strain ATCC 12228 / FDA PCI 1200) OX=176280 GN=hemB PE=3 SV=1	2	659.32	-1.0051	178.81	8.0716e-15	yes
76	AAALNGWIDEEK	12	Q8CNZ0;Q5HNN5;D4FIF6;A0A509LSI6;A0A2T4LIG3;A0A7H5C892;A0A7I0ANN0;A0A0E1VBN1	Q8CNZ0	Delta-aminolevulinic acid dehydratase OS=Staphylococcus epidermidis (strain ATCC 12228 / FDA PCI 1200) OX=176280 GN=hemB PE=3 SV=1	3	439.882	-1.1207	84.479	0.00053875	yes
77	AAALNGWIDEEK	12	Q8CNZ0;Q5HNN5;D4FIF6;A0A509LSI6;A0A2T4LIG3;A0A7H5C892;A0A7I0ANN0;A0A0E1VBN1	Q8CNZ0	Delta-aminolevulinic acid dehydratase OS=Staphylococcus epidermidis (strain ATCC 12228 / FDA PCI 1200) OX=176280 GN=hemB PE=3 SV=1	3	439.882	-0.36156	42.095	0.044772	yes
78	AAALNGWIDEEK	12	Q8CNZ0;Q5HNN5;D4FIF6;A0A509LSI6;A0A2T4LIG3;A0A7H5C892;A0A7I0ANN0;A0A0E1VBN1	Q8CNZ0	Delta-aminolevulinic acid dehydratase OS=Staphylococcus epidermidis (strain ATCC 12228 / FDA PCI 1200) OX=176280 GN=hemB PE=3 SV=1	2	659.32	-0.22368	143.96	9.3838e-08	yes	0.817	1.145	1.101	1.142	0.873	0.922
79	AAALNGWIDEEK	12	Q8CNZ0;Q5HNN5;D4FIF6;A0A509LSI6;A0A2T4LIG3;A0A7H5C892;A0A7I0ANN0;A0A0E1VBN1	Q8CNZ0	Delta-aminolevulinic acid dehydratase OS=Staphylococcus epidermidis (strain ATCC 12228 / FDA PCI 1200) OX=176280 GN=hemB PE=3 SV=1	2	659.32	-0.52108	196.76	7.2567e-26	yes	0.891	1.077	1.078	1.035	0.927	0.992
80	AAALNGWIDEEK	12	Q8CNZ0;Q5HNN5;D4FIF6;A0A509LSI6;A0A2T4LIG3;A0A7H5C892;A0A7I0ANN0;A0A0E1VBN1	Q8CNZ0	Delta-aminolevulinic acid dehydratase OS=Staphylococcus epidermidis (strain ATCC 12228 / FDA PCI 1200) OX=176280 GN=hemB PE=3 SV=1	2	658.828	-0.15459	206.97	4.7344e-27	yes	0.89	1.078	1.128	1.011	0.891	1.001
81	AAALNGWIDEEK	12	Q8CNZ0;Q5HNN5;D4FIF6;A0A509LSI6;A0A2T4LIG3;A0A7H5C892;A0A7I0ANN0;A0A0E1VBN1	Q8CNZ0	Delta-aminolevulinic acid dehydratase OS=Staphylococcus epidermidis (strain ATCC 12228 / FDA PCI 1200) OX=176280 GN=hemB PE=3 SV=1	3	439.554	-0.059456	80.979	0.00060261	yes	0.943	1.045	1.128	1.098	0.78	1.006
82	AAALNGWIDEEK	12	Q8CNZ0;Q5HNN5;D4FIF6;A0A509LSI6;A0A2T4LIG3;A0A7H5C892;A0A7I0ANN0;A0A0E1VBN1	Q8CNZ0	Delta-aminolevulinic acid dehydratase OS=Staphylococcus epidermidis (strain ATCC 12228 / FDA PCI 1200) OX=176280 GN=hemB PE=3 SV=1	2	658.828	1.323	149.96	1.5443e-08	yes	0.917	1.065	1.038	1.084	0.898	0.998
83	AAALNGWIDEEK	12	Q8CNZ0;Q5HNN5;D4FIF6;A0A509LSI6;A0A2T4LIG3;A0A7H5C892;A0A7I0ANN0;A0A0E1VBN1	Q8CNZ0	Delta-aminolevulinic acid dehydratase OS=Staphylococcus epidermidis (strain ATCC 12228 / FDA PCI 1200) OX=176280 GN=hemB PE=3 SV=1	3	439.554	1.3814	77.062	0.0007967	yes	0.793	1.165	1.398	1.029	0.773	0.843
84	AAATVHTPNGGR	12	D4FLA9;A0A7I0AZK4;A0A7G9EAK1;A0A5E8Q8J5;A0A0H2VEN4;Q5HKP4;A0A4Y7VR26	D4FLA9	N-acetyltransferase OS=Staphylococcus epidermidis M23864:W2(grey) OX=525375 GN=HMPREF0794_1347 PE=3 SV=1	3	384.535	-0.42706	67.93	0.0026462	yes	0.85	1.04	1.048	1.144	0.837	1.081
85	AAAVSDYTPMDILEHK	16	D4FJP3;A0A0N1EB45;A0A0H2VFV3;A0A7I0AJT5;A0A7H5C9N5;Q5HPX9;A0A0E1VD86	D4FJP3	Coenzyme A biosynthesis bifunctional protein CoaBC OS=Staphylococcus epidermidis M23864:W2(grey) OX=525375 GN=coaBC PE=3 SV=1	3	592.954	0.46912	90.444	7.3103e-05	yes	1.053	1.031	0.97	1.054	0.875	1.018
86	AAAVSDYTPMDILEHK	16	D4FJP3;A0A0N1EB45;A0A0H2VFV3;A0A7I0AJT5;A0A7H5C9N5;Q5HPX9;A0A0E1VD86	D4FJP3	Coenzyme A biosynthesis bifunctional protein CoaBC OS=Staphylococcus epidermidis M23864:W2(grey) OX=525375 GN=coaBC PE=3 SV=1	3	587.622	-0.3103	82.578	0.00016255	yes
87	AAAVSDYTPMDILEHK	16	D4FJP3;A0A0N1EB45;A0A0H2VFV3;A0A7I0AJT5;A0A7H5C9N5;Q5HPX9;A0A0E1VD86	D4FJP3	Coenzyme A biosynthesis bifunctional protein CoaBC OS=Staphylococcus epidermidis M23864:W2(grey) OX=525375 GN=coaBC PE=3 SV=1	3	587.622	-1.2069	61.641	0.00157	yes
88	AAAVSDYTPMDILEHK	16	D4FJP3;A0A0N1EB45;A0A0H2VFV3;A0A7I0AJT5;A0A7H5C9N5;Q5HPX9;A0A0E1VD86	D4FJP3	Coenzyme A biosynthesis bifunctional protein CoaBC OS=Staphylococcus epidermidis M23864:W2(grey) OX=525375 GN=coaBC PE=3 SV=1	3	587.622	-0.49922	150.12	4.9647e-18	yes	1.196	0.884	0.708	1.17	0.966	1.076
89	AAAYNMPGVR	10	D4FLD3;A0A2G7I0Y2;A0A0H2VEX3;A0A6N4J0V1;A0A509LXH9;A0A7I0AN36;A0A0E1VCJ1;A0A7G9EAH8;Q5HPD1	Q5HPD1	Uncharacterized protein OS=Staphylococcus epidermidis (strain ATCC 35984 / RP62A) OX=176279 GN=SERP0981 PE=4 SV=1	2	533.261		46.835	0.049461	no
90	AACEAYGYELDPETEK	16	A0A7I0BZS7;Q8CTX6;A0A2G7I159;Q5HKH9;A0A7G9EAD8;A0A5R1C5R3;D4FLH2;A0A0E1VJ52	Q8CTX6	Formate acetyltransferase OS=Staphylococcus epidermidis (strain ATCC 12228 / FDA PCI 1200) OX=176280 GN=pflB PE=3 SV=1	2	923.396	1.7496	180.18	3.4161e-25	no	1.328	0.689	0.581	0.894	1.243	1.264
91	AACEAYGYELDPETEK	16	A0A7I0BZS7;Q8CTX6;A0A2G7I159;Q5HKH9;A0A7G9EAD8;A0A5R1C5R3;D4FLH2;A0A0E1VJ52	Q8CTX6	Formate acetyltransferase OS=Staphylococcus epidermidis (strain ATCC 12228 / FDA PCI 1200) OX=176280 GN=pflB PE=3 SV=1	3	615.933	1.7276	123.76	3.4666e-09	no	1.263	0.715	0.696	0.992	1.15	1.183
92	AACEAYGYELDPETEK	16	A0A7I0BZS7;Q8CTX6;A0A2G7I159;Q5HKH9;A0A7G9EAD8;A0A5R1C5R3;D4FLH2;A0A0E1VJ52	Q8CTX6	Formate acetyltransferase OS=Staphylococcus epidermidis (strain ATCC 12228 / FDA PCI 1200) OX=176280 GN=pflB PE=3 SV=1	4	462.202	1.7723	53.403	0.0048715	no
93	AACEAYGYELDPETEK	16	A0A7I0BZS7;Q8CTX6;A0A2G7I159;Q5HKH9;A0A7G9EAD8;A0A5R1C5R3;D4FLH2;A0A0E1VJ52	Q8CTX6	Formate acetyltransferase OS=Staphylococcus epidermidis (strain ATCC 12228 / FDA PCI 1200) OX=176280 GN=pflB PE=3 SV=1	3	615.933		78.285	0.00026885	no
94	AACEAYGYELDPETEK	16	A0A7I0BZS7;Q8CTX6;A0A2G7I159;Q5HKH9;A0A7G9EAD8;A0A5R1C5R3;D4FLH2;A0A0E1VJ52	Q8CTX6	Formate acetyltransferase OS=Staphylococcus epidermidis (strain ATCC 12228 / FDA PCI 1200) OX=176280 GN=pflB PE=3 SV=1	3	615.933	-0.71693	106.42	2.4358e-06	no
95	AACEAYGYELDPETEK	16	A0A7I0BZS7;Q8CTX6;A0A2G7I159;Q5HKH9;A0A7G9EAD8;A0A5R1C5R3;D4FLH2;A0A0E1VJ52	Q8CTX6	Formate acetyltransferase OS=Staphylococcus epidermidis (strain ATCC 12228 / FDA PCI 1200) OX=176280 GN=pflB PE=3 SV=1	2	923.396	-0.23136	248.77	6.09e-68	no	0.354	1.605	2.198	0.728	0.44	0.674
96	AACEAYGYELDPETEK	16	A0A7I0BZS7;Q8CTX6;A0A2G7I159;Q5HKH9;A0A7G9EAD8;A0A5R1C5R3;D4FLH2;A0A0E1VJ52	Q8CTX6	Formate acetyltransferase OS=Staphylococcus epidermidis (strain ATCC 12228 / FDA PCI 1200) OX=176280 GN=pflB PE=3 SV=1	3	615.933	-0.23273	69.431	0.00075077	no
97	AACEAYGYELDPETEK	16	A0A7I0BZS7;Q8CTX6;A0A2G7I159;Q5HKH9;A0A7G9EAD8;A0A5R1C5R3;D4FLH2;A0A0E1VJ52	Q8CTX6	Formate acetyltransferase OS=Staphylococcus epidermidis (strain ATCC 12228 / FDA PCI 1200) OX=176280 GN=pflB PE=3 SV=1	3	615.933	-1.2712	154.6	1.1111e-18	no	0.829	1.123	1.184	0.963	0.831	1.07
98	AACEAYGYELDPETEK	16	A0A7I0BZS7;Q8CTX6;A0A2G7I159;Q5HKH9;A0A7G9EAD8;A0A5R1C5R3;D4FLH2;A0A0E1VJ52	Q8CTX6	Formate acetyltransferase OS=Staphylococcus epidermidis (strain ATCC 12228 / FDA PCI 1200) OX=176280 GN=pflB PE=3 SV=1	2	923.396	-0.83641	248.77	6.09e-68	no	0.741	1.197	1.235	0.961	0.825	1.041
99	AADEIGAISHVGNVLSSDTFYNADSTFNDSWK	32	Q5HM82;D4FHN4;A0A7I0A7F1;A0A7H5C4Q6;A0A4Y7VSX8;A0A0H2VHA7	Q5HM82	Purine nucleoside phosphorylase DeoD-type OS=Staphylococcus epidermidis (strain ATCC 35984 / RP62A) OX=176279 GN=deoD PE=3 SV=1	4	858.893	0.56021	53.615	3.2815e-05	yes
100	AADEIGAISHVGNVLSSDTFYNADSTFNDSWK	32	Q5HM82;D4FHN4;A0A7I0A7F1;A0A7H5C4Q6;A0A4Y7VSX8;A0A0H2VHA7	Q5HM82	Purine nucleoside phosphorylase DeoD-type OS=Staphylococcus epidermidis (strain ATCC 35984 / RP62A) OX=176279 GN=deoD PE=3 SV=1	4	858.893	0.17055	84.665	1.5292e-12	yes	1.035	0.944	0.809	1.191	1.02	1.001
101	AADEIGAISHVGNVLSSDTFYNADSTFNDSWK	32	Q5HM82;D4FHN4;A0A7I0A7F1;A0A7H5C4Q6;A0A4Y7VSX8;A0A0H2VHA7	Q5HM82	Purine nucleoside phosphorylase DeoD-type OS=Staphylococcus epidermidis (strain ATCC 35984 / RP62A) OX=176279 GN=deoD PE=3 SV=1	3	1145.18		79.365	1.3121e-13	yes
102	AADEIGAISHVGNVLSSDTFYNADSTFNDSWK	32	Q5HM82;D4FHN4;A0A7I0A7F1;A0A7H5C4Q6;A0A4Y7VSX8;A0A0H2VHA7	Q5HM82	Purine nucleoside phosphorylase DeoD-type OS=Staphylococcus epidermidis (strain ATCC 35984 / RP62A) OX=176279 GN=deoD PE=3 SV=1	4	858.647	0.50817	126.88	4.9092e-28	yes	1.148	0.905	0.866	0.983	1.075	1.023
103	AADEIGAISHVGNVLSSDTFYNADSTFNDSWK	32	Q5HM82;D4FHN4;A0A7I0A7F1;A0A7H5C4Q6;A0A4Y7VSX8;A0A0H2VHA7	Q5HM82	Purine nucleoside phosphorylase DeoD-type OS=Staphylococcus epidermidis (strain ATCC 35984 / RP62A) OX=176279 GN=deoD PE=3 SV=1	5	687.119	0.33423	127.59	3.171e-28	yes
104	AADEIGAISHVGNVLSSDTFYNADSTFNDSWK	32	Q5HM82;D4FHN4;A0A7I0A7F1;A0A7H5C4Q6;A0A4Y7VSX8;A0A0H2VHA7	Q5HM82	Purine nucleoside phosphorylase DeoD-type OS=Staphylococcus epidermidis (strain ATCC 35984 / RP62A) OX=176279 GN=deoD PE=3 SV=1	3	1144.53	1.018	199.2	2.7935e-80	yes	1.311	0.712	0.505	1.132	1.248	1.092
105	AADEIGAISHVGNVLSSDTFYNADSTFNDSWK	32	Q5HM82;D4FHN4;A0A7I0A7F1;A0A7H5C4Q6;A0A4Y7VSX8;A0A0H2VHA7	Q5HM82	Purine nucleoside phosphorylase DeoD-type OS=Staphylococcus epidermidis (strain ATCC 35984 / RP62A) OX=176279 GN=deoD PE=3 SV=1	3	1144.53	0.20119	137.5	7.7257e-33	yes	1.368	0.763	0.584	0.992	1.179	1.114
106	AADEIGAISHVGNVLSSDTFYNADSTFNDSWK	32	Q5HM82;D4FHN4;A0A7I0A7F1;A0A7H5C4Q6;A0A4Y7VSX8;A0A0H2VHA7	Q5HM82	Purine nucleoside phosphorylase DeoD-type OS=Staphylococcus epidermidis (strain ATCC 35984 / RP62A) OX=176279 GN=deoD PE=3 SV=1	5	687.119	-0.26627	104.12	1.0004e-21	yes
107	AADLLLK	7	Q5HN22;A0A7I0AMX5;A0A5E9M1Z5;A0A0N1MU41;A0A0H2VKQ9;D4FKF1;A0A7I0A7Y8;A0A0E1VN47	Q5HN22	Nicotinate phosphoribosyltransferase OS=Staphylococcus epidermidis (strain ATCC 35984 / RP62A) OX=176279 GN=SERP1450 PE=3 SV=1	2	372.237	-1.0007	108.09	0.0090592	no	0.807	0.96	1.336	1.135	0.792	0.97
108	AADNGISAAQLAMNLNENLPEK	22	A0A7H5C573;A0A0E1VGL9;D4FLF3;A0A4V2KUX5;A0A0H2VIZ4;A0A7I0AJC7;A0A7G9EBN2;Q5HLY7	A0A7H5C573	Efflux RND transporter permease subunit OS=Staphylococcus epidermidis OX=1282 GN=F9B71_10030 PE=4 SV=1	4	571.786	-0.68816	61.524	0.00014652	no
109	AADYLVDVGPGAGNHGGEVVSSGTPNK	27	Q8CPY9;Q5HQW9;D4FNJ4;A0A2G7HXW5;A0A7G9EFB8;A0A7I0ALF5;A0A7H5C815;A0A0E1VGC5	Q8CPY9	UvrABC system protein A OS=Staphylococcus epidermidis (strain ATCC 12228 / FDA PCI 1200) OX=176280 GN=uvrA PE=3 SV=1	3	856.749	-0.83563	136.4	4.9806e-22	yes	1.364	0.788	0.405	1.079	1.269	1.095
110	AADYLVDVGPGAGNHGGEVVSSGTPNK	27	Q8CPY9;Q5HQW9;D4FNJ4;A0A2G7HXW5;A0A7G9EFB8;A0A7I0ALF5;A0A7H5C815;A0A0E1VGC5	Q8CPY9	UvrABC system protein A OS=Staphylococcus epidermidis (strain ATCC 12228 / FDA PCI 1200) OX=176280 GN=uvrA PE=3 SV=1	5	514.452	-0.80426	43.696	0.0028797	yes
111	AADYLVDVGPGAGNHGGEVVSSGTPNK	27	Q8CPY9;Q5HQW9;D4FNJ4;A0A2G7HXW5;A0A7G9EFB8;A0A7I0ALF5;A0A7H5C815;A0A0E1VGC5	Q8CPY9	UvrABC system protein A OS=Staphylococcus epidermidis (strain ATCC 12228 / FDA PCI 1200) OX=176280 GN=uvrA PE=3 SV=1	4	642.814	-0.74332	71.696	6.2945e-07	yes	1.287	0.724	0.607	1.18	1.147	1.055
112	AAEAAYLLDEEMSEIKDEIQEAQK	24	Q5HQG3;D4FK82;A0A7I0BMJ9;A0A0N1EJB3;A0A0H2VFR3;A0A0E1VG08;A0A0H2WVQ5	Q5HQG3	GTP pyrophosphokinase OS=Staphylococcus epidermidis (strain ATCC 35984 / RP62A) OX=176279 GN=relA-1 PE=4 SV=1	3	908.769	0.30517	119.01	1.8319e-13	yes
113	AAEAAYLLDEEMSEIKDEIQEAQK	24	Q5HQG3;D4FK82;A0A7I0BMJ9;A0A0N1EJB3;A0A0H2VFR3;A0A0E1VG08;A0A0H2WVQ5	Q5HQG3	GTP pyrophosphokinase OS=Staphylococcus epidermidis (strain ATCC 35984 / RP62A) OX=176279 GN=relA-1 PE=4 SV=1	4	681.828	0.00099404	244.81	9.2121e-95	yes	0.568	1.341	1.664	0.895	0.636	0.897
114	AAEAAYLLDEEMSEIKDEIQEAQK	24	Q5HQG3;D4FK82;A0A7I0BMJ9;A0A0N1EJB3;A0A0H2VFR3;A0A0E1VG08;A0A0H2WVQ5	Q5HQG3	GTP pyrophosphokinase OS=Staphylococcus epidermidis (strain ATCC 35984 / RP62A) OX=176279 GN=relA-1 PE=4 SV=1	3	908.769	0.36417	235.76	4.5171e-84	yes	0.57	1.43	1.574	0.89	0.669	0.867
115	AAEAAYLLDEEMSEIKDEIQEAQK	24	Q5HQG3;D4FK82;A0A7I0BMJ9;A0A0N1EJB3;A0A0H2VFR3;A0A0E1VG08;A0A0H2WVQ5	Q5HQG3	GTP pyrophosphokinase OS=Staphylococcus epidermidis (strain ATCC 35984 / RP62A) OX=176279 GN=relA-1 PE=4 SV=1	4	681.828	-0.62623	165.46	2.6736e-33	yes	1.058	1.011	0.831	0.978	1.059	1.063
116	AAEAAYLLDEEMSEIKDEIQEAQK	24	Q5HQG3;D4FK82;A0A7I0BMJ9;A0A0N1EJB3;A0A0H2VFR3;A0A0E1VG08;A0A0H2WVQ5	Q5HQG3	GTP pyrophosphokinase OS=Staphylococcus epidermidis (strain ATCC 35984 / RP62A) OX=176279 GN=relA-1 PE=4 SV=1	3	908.769	0.29605	261.49	8.0002e-108	yes	1.074	0.932	0.78	1.08	1.042	1.093
117	AAEAAYLLDEEMSEIKDEIQEAQK	24	Q5HQG3;D4FK82;A0A7I0BMJ9;A0A0N1EJB3;A0A0H2VFR3;A0A0E1VG08;A0A0H2WVQ5	Q5HQG3	GTP pyrophosphokinase OS=Staphylococcus epidermidis (strain ATCC 35984 / RP62A) OX=176279 GN=relA-1 PE=4 SV=1	5	545.664	-0.61427	64.87	1.9215e-05	yes	0.884	1.092	1.058	1.021	0.956	0.989
118	AAEAAYLLDEEMSEIKDEIQEAQK	24	Q5HQG3;D4FK82;A0A7I0BMJ9;A0A0N1EJB3;A0A0H2VFR3;A0A0E1VG08;A0A0H2WVQ5	Q5HQG3	GTP pyrophosphokinase OS=Staphylococcus epidermidis (strain ATCC 35984 / RP62A) OX=176279 GN=relA-1 PE=4 SV=1	3	908.769	0.46223	228.57	6.7113e-83	yes	1.082	0.924	0.838	1.022	1.013	1.12
119	AAEAAYLLDEEMSEIKDEIQEAQK	24	Q5HQG3;D4FK82;A0A7I0BMJ9;A0A0N1EJB3;A0A0H2VFR3;A0A0E1VG08;A0A0H2WVQ5	Q5HQG3	GTP pyrophosphokinase OS=Staphylococcus epidermidis (strain ATCC 35984 / RP62A) OX=176279 GN=relA-1 PE=4 SV=1	5	545.664	0.1628	93.583	1.0103e-08	yes	1.027	0.91	0.813	1.119	1.017	1.114
[truncated: 66,844 more rows]
